# Supplementary material for: Genome-wide identification and expression analysis of the LBD gene family in Jasminum sambac
Source: Research Square preprint supplement (doi:10.21203/rs.3.rs-7770306/v1), 2025-10-30
Supplement: Supplementary file 1 [file 0aecb6ee4eda416ff32a616e.xlsx]

## Sheet: Sheet1
Group	Gene 1	Original gene ID 1	Gene 2	Original gene ID 2	Ka	Ks	Ka/Ks	Selection pressure
HtLBD	HtLBD14	HT09235.t1	HtLBD22	HT16648.t1	0.236484	3.45445	0.0684577	Purifying selection
HtLBD	HtLBD17	HT12190.t1	HtLBD33	HT25728.t1	0.190298	1.38653	0.137248	Purifying selection
HtLBD	HtLBD31	HT24365.t1	HtLBD35	HT28767.t1	0.448053	3.19265	0.140339	Purifying selection
HtLBD	HtLBD26	HT20060.t1	HtLBD34	HT28587.t1	0.207501	1.36244	0.152301	Purifying selection
HtLBD	HtLBD13	HT07143.t1	HtLBD21	HT16275.t1	0.261291	1.5722	0.166194	Purifying selection
HtLBD	HtLBD12	HT07092.t1	HtLBD20	HT16108.t1	0.252624	1.34675	0.18758	Purifying selection
HtLBD	HtLBD20	HT16108.t1	HtLBD25	HT17984.t1	0.235122	1.1519	0.204117	Purifying selection
HtLBD	HtLBD18	HT13091.t1	HtLBD32	HT25085.t1	0.368964	1.5976	0.230949	Purifying selection
HtLBD	HtLBD08	HT04921.t1	HtLBD35	HT28767.t1	0.439963	0	—*	—
HtLBD	HtLBD12	HT07092.t1	HtLBD17	HT12190.t1	0.30848	0	—*	—
HtLBD	HtLBD07	HT03824.t1	HtLBD09	HT05423.t1	0.471553	0	—*	—
HtLBD	HtLBD01	HT00490.t1	HtLBD09	HT05423.t1	0.487247	0	—*	—
SjLBD	SjLBD34	SJ09548.t1	SjLBD39	SJ17258.t1	0.240963	2.83449	0.0850108	Purifying selection
SjLBD	SjLBD06	SJ26702.t1	SjLBD25	SJ12641.t1	0.189771	1.21948	0.155617	Purifying selection
SjLBD	SjLBD15	SJ29572.t1	SjLBD28	SJ20629.t1	0.207501	1.31378	0.157942	Purifying selection
SjLBD	SjLBD20	SJ07430.t1	SjLBD38	SJ16881.t1	0.261291	1.5722	0.166194	Purifying selection
SjLBD	SjLBD19	SJ07371.t1	SjLBD37	SJ16728.t1	0.244936	1.35793	0.180375	Purifying selection
SjLBD	SjLBD04	SJ26061.t1	SjLBD26	SJ13614.t1	0.368964	1.54312	0.239104	Purifying selection
SjLBD	SjLBD03	SJ25339.t1	SjLBD16	SJ29747.t1	0.227833	0.784316	0.290486	Purifying selection
SjLBD	SjLBD09	SJ00846.t1	SjLBD14	SJ01167.t1	0	0	—†	—
SjLBD	SjLBD19	SJ07371.t1	SjLBD25	SJ12641.t1	0.317003	0	—*	—
DjLBD	DjLBD06	DJ24120.t1	DjLBD10	DJ29381.t1	0.223181	0.794323	0.28097	Purifying selection
DjLBD	DjLBD08	DJ25433.t1	DjLBD23	DJ12163.t1	0.184933	1.22647	0.150785	Purifying selection
DjLBD	DjLBD10	DJ29381.t1	DjLBD14	DJ04848.t1	0.304322	1.40081	0.217247	Purifying selection
DjLBD	DjLBD11	DJ29555.t1	DjLBD32	DJ19876.t1	0.207501	1.31378	0.157942	Purifying selection
DjLBD	DjLBD18	DJ07014.t1	DjLBD28	DJ15208.t1	0.238955	1.35318	0.176587	Purifying selection
DjLBD	DjLBD19	DJ07071.t1	DjLBD27	DJ15054.t1	0.261291	1.5722	0.166194	Purifying selection
DjLBD	DjLBD28	DJ15208.t1	DjLBD31	DJ17856.t1	0.229206	1.19323	0.192089	Purifying selection
