# Supplementary material for: Genome-wide identification and expression analysis of the LBD gene family in Jasminum sambac
Source: Research Square preprint supplement (doi:10.21203/rs.3.rs-7770306/v1), 2025-10-30
Supplement: Supplementary file 2 [file 0c97a3a93ce440f37a471b39.xlsx]

## Sheet: Sheet1
ID	DJ1-1 (0 h, FPKM)	DJ1-2 (0 h, FPKM)	DJ1-3 (0 h, FPKM)	DJ3-1 (96 h, FPKM)	DJ3-2 (96 h, FPKM)	DJ3-3 (96 h, FPKM)	DJ1-1 (0 h, COUNT)	DJ1-2 (0 h, COUNT)	DJ1-3 (0 h, COUNT)	DJ3-1 (96 h, COUNT)	DJ3-2 (96 h, COUNT)	DJ3-3 (96 h, COUNT)	log2FoldChange (96h / 0h)	pvalue	padj	regulated	chr	start	end	strand	gene_name	gene_description	KEGG	KEGG pathway	NR	Swissprot	Tremble	KOG	GO	Pfam	TF-Family	TF-Category	TF-Classification
DJ19726	9.9344	8.9505	11.3068	2972.03	2257.9	2702.17	84	99	92	24581	19154	20546	8.18528	0	0	up	GWHBFHJ00000012	3852045	3852984	-	DJ19726	--	--	--	pathogenesis-related STH-2-like [Olea europaea subsp. europaea]	FRA16_FRAAN RecName: Full=Major strawberry allergen Fra a 1.06 {ECO:0000305}; AltName: Full=Class 10 plant pathogenesis-related protein Fra a 1.06 {ECO:0000305}; Short=PR10-related protein Fra a 1.06 {ECO:0000305}; EC=3.1.27.- {ECO:0000269|PubMed:30572279}; AltName: Allergen=Fra a 1 {ECO:0000305};	A0A022QXI4_ERYGU RecName: Full=Bet_v_1 domain-containing protein {ECO:0000259|Pfam:PF00407};	--	GO:0010427,abscisic acid binding; GO:0004518,nuclease activity; GO:0004864,protein phosphatase inhibitor activity; GO:0038023,signaling receptor activity; GO:0009738,abscisic acid-activated signaling pathway; GO:0006952,defense response; GO:0009607,response to biotic stimulus; GO:0003674,molecular_function; GO:0005488,binding; GO:0008289,lipid binding; GO:0019840,isoprenoid binding; GO:0031406,ca…	PF00407.22:Pathogenesis-related protein Bet v 1 family	--	--	--
DJ22422	2.5897	2.7823	2.9821	1145.73	1030.97	1046.56	37	52	41	16012	14778	13446	8.73648	0	0	up	GWHBFHJ00000013	8774093	8774898	+	DJ22422	--	K26731 K+:H+ antiporter | (RefSeq) cation/H(+) antiporter 18-like isoform X1 (A)	--	dirigent protein 5-like [Olea europaea var. sylvestris]	DIR5_ARATH RecName: Full=Dirigent protein 5; Short=AtDIR5; Flags: Precursor;	A0A6I9SSN4_SESIN RecName: Full=Dirigent protein {ECO:0000256|RuleBase:RU363099};	--	GO:0048046,apoplast; GO:0042349,guiding stereospecific synthesis activity; GO:1901599,(-)-pinoresinol biosynthetic process; GO:0003674,molecular_function; GO:0030234,enzyme regulator activity; GO:0098772,molecular function regulator activity; GO:0006725,cellular aromatic compound metabolic process; GO:0008150,biological_process; GO:0008152,metabolic process; GO:0009058,biosynthetic process; GO:00…	PF03018.17:Dirigent-like protein	--	--	--
DJ04318	1.305	0.9976	1.4794	787.712	815.711	814.818	22	22	24	12989	13796	12352	9.49019	7.20217e-287	4.91308e-283	up	GWHBFHJ00000006	23972422	23973761	-	DJ04318	--	K19642 D-galacturonate reductase [EC:1.1.1.365] | (RefSeq) D-galacturonate reductase-like (A)	ko00053: Ascorbate and aldarate metabolism; ko01240: Biosynthesis of cofactors	D-galacturonate reductase-like [Olea europaea var. sylvestris]	GALUR_FRAAN RecName: Full=D-galacturonate reductase; Short=FaGalUR; EC=1.1.1.365; AltName: Full=Aldo-keto reductase 2;	A0A2G9GDT1_9LAMI SubName: Full=Aldo/keto reductase family protein {ECO:0000313|EMBL:PIN03439.1}; EC=1.1.1.365 {ECO:0000313|EMBL:PIN03439.1};	Aldo/keto reductase family proteins	GO:0102098,D-galacturonate reductase activity; GO:0019853,L-ascorbic acid biosynthetic process; GO:0003674,molecular_function; GO:0003824,catalytic activity; GO:0016491,oxidoreductase activity; GO:0016614,oxidoreductase activity, acting on CH-OH group of donors; GO:0016616,oxidoreductase activity, acting on the CH-OH group of donors, NAD or NADP as acceptor; GO:0005975,carbohydrate metabolic proc…	PF00248.24:Aldo/keto reductase family	--	--	--
DJ26727	0.706	0.8831	1.3339	571.054	589.257	620.74	22	36	40	17407	18423	17395	9.416	6.1674e-286	3.15539e-282	up	GWHBFHJ00000003	20352458	20354303	-	DJ26727	--	K00422 polyphenol oxidase [EC:1.10.3.1] | (RefSeq) aureusidin synthase-like (A)	ko00350: Tyrosine metabolism; ko00950: Isoquinoline alkaloid biosynthesis; ko01100: Metabolic pathways; ko01110: Biosynthesis of secondary metabolites	polyphenol oxidase, chloroplastic-like [Olea europaea subsp. europaea]	PPO_MALDO RecName: Full=Polyphenol oxidase, chloroplastic; Short=PPO; EC=1.10.3.1; AltName: Full=Catechol oxidase; Flags: Precursor;	A0A6I9UES7_SESIN SubName: Full=aureusidin synthase {ECO:0000313|RefSeq:XP_011096441.1};	--	GO:0009543,chloroplast thylakoid lumen; GO:0004097,catechol oxidase activity; GO:0046872,metal ion binding; GO:0046148,pigment biosynthetic process; GO:0003674,molecular_function; GO:0003824,catalytic activity; GO:0004497,monooxygenase activity; GO:0016491,oxidoreductase activity; GO:0016679,oxidoreductase activity, acting on diphenols and related substances as donors; GO:0016682,oxidoreductase a…	PF12143.11:Protein of unknown function (DUF_B2219)	--	--	--
DJ13584	5.7003	9.0909	10.928	4150.89	3542.11	3972.47	116	242	214	82625	72317	72694	8.97792	6.27502e-264	2.56837e-260	up	GWHBFHJ00000009	31588675	31590055	+	DJ13584	--	no KO assigned | (RefSeq) glucan endo-1,3-beta-glucosidase-like (A)	--	glucan endo-1,3-beta-glucosidase, acidic-like [Olea europaea subsp. europaea]	E13H_TOBAC RecName: Full=Glucan endo-1,3-beta-glucosidase, acidic isoform PR-Q'; EC=3.2.1.39; AltName: Full=(1->3)-beta-glucan endohydrolase; Short=(1->3)-beta-glucanase; AltName: Full=Beta-1,3-endoglucanase; AltName: Full=PR-35; Flags: Precursor;	Q68V46_OLEEU SubName: Full=Beta-1,3-glucanase {ECO:0000313|EMBL:CAH17549.1};	--	GO:0046658,anchored component of plasma membrane; GO:0048046,apoplast; GO:0042973,glucan endo-1,3-beta-D-glucosidase activity; GO:0005975,carbohydrate metabolic process; GO:0006952,defense response; GO:0003674,molecular_function; GO:0003824,catalytic activity; GO:0004553,hydrolase activity, hydrolyzing O-glycosyl compounds; GO:0008422,beta-glucosidase activity; GO:0015926,glucosidase activity; GO…	PF00332.21:Glycosyl hydrolases family 17	--	--	--
DJ05793	2.5486	3.9492	3.4358	1639.35	1936.65	1744.07	37	75	48	23280	28208	22769	9.20841	3.12476e-252	1.0658e-248	up	GWHBFHJ00000006	41323534	41324352	-	DJ05793	--	K09841 xanthoxin dehydrogenase [EC:1.1.1.288] | (RefSeq) xanthoxin dehydrogenase-like (A)	ko00906: Carotenoid biosynthesis; ko01100: Metabolic pathways; ko01110: Biosynthesis of secondary metabolites	(-)-isopiperitenol/(-)-carveol dehydrogenase, mitochondrial-like [Olea europaea var. sylvestris]	ISPD_MENPI RecName: Full=(-)-isopiperitenol/(-)-carveol dehydrogenase, mitochondrial; EC=1.1.1.223; EC=1.1.1.243; Flags: Precursor;	A0A6P6X9C4_COFAR SubName: Full=(-)-isopiperitenol/(-)-carveol dehydrogenase, mitochondrial-like isoform X1 {ECO:0000313|RefSeq:XP_027125639.1}; SubName: Full=LOW QUALITY PROTEIN: (-)-isopiperitenol/(-)-carveol dehydrogenase, mitochondrial-like {ECO:0000313|RefSeq:XP_027123909.1};	Reductases with broad range of substrate specificities	GO:0005739,mitochondrion; GO:0018459,carveol dehydrogenase activity; GO:0018458,isopiperitenol dehydrogenase activity; GO:0000166,nucleotide binding; GO:0031525,menthol biosynthetic process; GO:0003674,molecular_function; GO:0003824,catalytic activity; GO:0016491,oxidoreductase activity; GO:0016614,oxidoreductase activity, acting on CH-OH group of donors; GO:0016616,oxidoreductase activity, actin…	PF13561.9:Enoyl-(Acyl carrier protein) reductase	--	--	--
novel.1260	0.8689	0.1533	0.9724	7096.64	5637.06	6573.41	13	3	14	103854	84612	88436	13.4586	2.88383e-233	8.43109e-230	up	GWHBFHJ00000005	20882767	20883945	-	--	--	K20628 expansin | (RefSeq) expansin-B15-like (A)	--	hypothetical protein BUALT_Bualt12G0068400 [Buddleja alternifolia]	EGC_CITJA RecName: Full=EG45-like domain containing protein; AltName: Full=Blight-associated protein p12; AltName: Full=Plant natriuretic peptide; Short=PNP; Flags: Precursor;	A0A022RPU1_ERYGU RecName: Full=Expansin-like EG45 domain-containing protein {ECO:0000259|PROSITE:PS50842};	--	GO:0048046,apoplast; GO:0009627,systemic acquired resistance; GO:0006950,response to stress; GO:0006952,defense response; GO:0008150,biological_process; GO:0009605,response to external stimulus; GO:0009607,response to biotic stimulus; GO:0043207,response to external biotic stimulus; GO:0044419,biological process involved in interspecies interaction between organisms; GO:0050896,response to stimul…	PF03330.21:Lytic transglycolase	--	--	--
DJ25283	0.9402	1.4824	1.4045	1039.37	1355.66	1114.77	16	33	23	17301	23145	17059	9.98842	5.21967e-219	1.33526e-215	up	GWHBFHJ00000002	25507117	25508502	+	DJ25283	--	K00430 peroxidase [EC:1.11.1.7] | (RefSeq) peroxidase N1-like (A)	ko00940: Phenylpropanoid biosynthesis; ko01100: Metabolic pathways; ko01110: Biosynthesis of secondary metabolites	peroxidase [Dorcoceras hygrometricum]	PERN1_TOBAC RecName: Full=Peroxidase N1; EC=1.11.1.7; AltName: Full=Peroxidase B2; AltName: Full=Peroxidase B3; Flags: Precursor;	A0A2Z7BEK3_9LAMI RecName: Full=Peroxidase {ECO:0000256|ARBA:ARBA00012313, ECO:0000256|RuleBase:RU362060}; EC=1.11.1.7 {ECO:0000256|ARBA:ARBA00012313, ECO:0000256|RuleBase:RU362060};	--	GO:0005576,extracellular region; GO:0009505,plant-type cell wall; GO:0020037,heme binding; GO:0046872,metal ion binding; GO:0004601,peroxidase activity; GO:0042744,hydrogen peroxide catabolic process; GO:0006979,response to oxidative stress; GO:0003674,molecular_function; GO:0005488,binding; GO:0046906,tetrapyrrole binding; GO:0097159,organic cyclic compound binding; GO:1901363,heterocyclic compo…	PF00141.26:Peroxidase	--	--	--
DJ26895	395.606	401.223	354.107	2.84	2.2364	2.7327	11108	14737	9568	78	63	69	-7.06875	1.42129e-217	3.23186e-214	down	GWHBFHJ00000003	22975934	22977606	-	DJ26895	--	K22683 aspartyl protease family protein [EC:3.4.23.-] | (RefSeq) aspartyl protease family protein 2-like (A)	--	aspartyl protease family protein At5g10770-like isoform X1 [Olea europaea var. sylvestris]	ASPA_ARATH RecName: Full=Aspartyl protease family protein At5g10770; EC=3.4.23.- {ECO:0000305}; Flags: Precursor;	A0A6I9UMY2_SESIN SubName: Full=aspartyl protease family protein At5g10770-like {ECO:0000313|RefSeq:XP_011095850.1};	Aspartyl protease	GO:0031225,anchored component of membrane; GO:0005886,plasma membrane; GO:0004190,aspartic-type endopeptidase activity; GO:0006508,proteolysis; GO:0003674,molecular_function; GO:0003824,catalytic activity; GO:0004175,endopeptidase activity; GO:0008233,peptidase activity; GO:0016787,hydrolase activity; GO:0070001,aspartic-type peptidase activity; GO:0140096,catalytic activity, acting on a protein;…	PF14543.9:Xylanase inhibitor N-terminal	--	--	--
DJ03662	1.032	1.0894	1.2766	193.717	174.566	208.531	21	29	25	3856	3564	3816	7.55429	2.80544e-209	5.74133e-206	up	GWHBFHJ00000006	7988158	7989305	-	DJ03662	--	K22097 3-O-acetylpapaveroxine carboxylesterase [EC:3.1.1.105] | (RefSeq) carboxylesterase 1-like (A)	ko00950: Isoquinoline alkaloid biosynthesis; ko01100: Metabolic pathways; ko01110: Biosynthesis of secondary metabolites	probable carboxylesterase 120 [Olea europaea subsp. europaea]	CXE20_ARATH RecName: Full=Probable carboxylesterase 120; AltName: Full=AtCXE20; EC=3.1.1.1;	A0A022Q8N9_ERYGU RecName: Full=Abhydrolase_3 domain-containing protein {ECO:0000259|Pfam:PF07859};	Arylacetamide deacetylase	GO:0043722,4-hydroxyphenylacetate decarboxylase activity; GO:0016787,hydrolase activity; GO:0003674,molecular_function; GO:0003824,catalytic activity; GO:0016829,lyase activity; GO:0016830,carbon-carbon lyase activity; GO:0016831,carboxy-lyase activity	PF07859.16:alpha/beta hydrolase fold	--	--	--
novel.2116	1.2192	1.8389	1.7806	316.056	360.63	352.293	37	73	52	9382	10980	9614	7.87852	7.21073e-206	1.34152e-202	up	GWHBFHJ00000008	2099342	2101250	-	--	--	K20617 cytochrome P450 family 71 subfamily A | (RefSeq) cytochrome P450 71A9-like (A)	--	cytochrome P450 71A6-like [Olea europaea var. sylvestris]	C7317_PRUMU RecName: Full=Cytochrome P450 736A117 {ECO:0000303|PubMed:25015725}; EC=1.14.-.- {ECO:0000305};	A0A6I9SRY0_SESIN SubName: Full=cytochrome P450 71A6-like {ECO:0000313|RefSeq:XP_011071980.1};	Cytochrome P450 CYP2 subfamily	GO:0016021,integral component of membrane; GO:0020037,heme binding; GO:0005506,iron ion binding; GO:0004497,monooxygenase activity; GO:0016705,oxidoreductase activity, acting on paired donors, with incorporation or reduction of molecular oxygen; GO:0003674,molecular_function; GO:0005488,binding; GO:0046906,tetrapyrrole binding; GO:0097159,organic cyclic compound binding; GO:1901363,heterocyclic c…	PF00067.25:Cytochrome P450	--	--	--
DJ05795	1.0458	2.043	2.1735	585.876	482.785	532.174	18	46	36	9864	8337	8237	8.38596	3.65439e-198	6.23225e-195	up	GWHBFHJ00000006	41328142	41329112	+	DJ05795	--	K09841 xanthoxin dehydrogenase [EC:1.1.1.288] | (RefSeq) xanthoxin dehydrogenase-like (A)	ko00906: Carotenoid biosynthesis; ko01100: Metabolic pathways; ko01110: Biosynthesis of secondary metabolites	(-)-isopiperitenol/(-)-carveol dehydrogenase, mitochondrial-like [Olea europaea var. sylvestris]	ISPD_MENPI RecName: Full=(-)-isopiperitenol/(-)-carveol dehydrogenase, mitochondrial; EC=1.1.1.223; EC=1.1.1.243; Flags: Precursor;	A0A2R6QGY1_ACTCC SubName: Full=(-)-isopiperitenol/(-)-carveol dehydrogenase {ECO:0000313|EMBL:PSS07877.1};	Reductases with broad range of substrate specificities	GO:0005739,mitochondrion; GO:0018459,carveol dehydrogenase activity; GO:0018458,isopiperitenol dehydrogenase activity; GO:0000166,nucleotide binding; GO:0031525,menthol biosynthetic process; GO:0003674,molecular_function; GO:0003824,catalytic activity; GO:0016491,oxidoreductase activity; GO:0016614,oxidoreductase activity, acting on CH-OH group of donors; GO:0016616,oxidoreductase activity, actin…	PF13561.9:Enoyl-(Acyl carrier protein) reductase	--	--	--
DJ09853	0.0752	0.2875	0.6253	8599.96	5797.85	5464.73	1	5	8	111837	77333	65332	14.4647	4.60041e-191	7.24211e-188	up	GWHBFHJ00000008	10286263	10288313	-	DJ09853	--	K20628 expansin | (RefSeq) expansin-B3 (A)	--	expansin-like B1 [Olea europaea var. sylvestris]	EXLB1_ARATH RecName: Full=Expansin-like B1; Short=At-EXPR1; Short=AtEXLB1; Short=AtEXPR1; AltName: Full=Ath-ExpBeta-3.1; Flags: Precursor;	A0A6I9SK31_SESIN SubName: Full=expansin-like B1 {ECO:0000313|RefSeq:XP_011070248.1};	--	GO:0005576,extracellular region; GO:0009653,anatomical structure morphogenesis; GO:0019953,sexual reproduction; GO:0008150,biological_process; GO:0032502,developmental process; GO:0048856,anatomical structure development; GO:0000003,reproduction; GO:0005575,cellular_component; GO:0110165,cellular anatomical entity	PF01357.24:Expansin C-terminal domain	--	--	--
DJ20032	12.8115	11.4533	13.4086	272.016	217.512	245.564	419	490	422	8702	7137	7222	4.43173	1.22471e-186	1.79026e-183	up	GWHBFHJ00000012	6796806	6801323	-	DJ20032	--	K08176 MFS transporter, PHS family, inorganic phosphate transporter | (RefSeq) inorganic phosphate transporter 1-4-like isoform X1 (A)	--	inorganic phosphate transporter 1-4-like isoform X4 [Olea europaea var. sylvestris]	PHT11_PETHY RecName: Full=Low affinity inorganic phosphate transporter 1 {ECO:0000303|PubMed:18315538, ECO:0000303|PubMed:19380421}; Short=PhPT1 {ECO:0000303|PubMed:18315538, ECO:0000303|PubMed:19380421}; Short=PhPht1;1 {ECO:0000303|PubMed:18315538}; AltName: Full=Arbuscular mycorrhiza-induced phosphate transporter PT1 {ECO:0000305}; Short=AM-induced phosphate transporter PT1 {ECO:0000305}; AltNa…	O22055_CATRO SubName: Full=Phosphate transporter {ECO:0000313|EMBL:BAA20522.1};	Inorganic phosphate transporter	GO:0016021,integral component of membrane; GO:0005886,plasma membrane; GO:0005315,inorganic phosphate transmembrane transporter activity; GO:0015293,symporter activity; GO:0009873,ethylene-activated signaling pathway; GO:0080187,floral organ senescence; GO:0006817,phosphate ion transport; GO:0009723,response to ethylene; GO:0003674,molecular_function; GO:0005215,transporter activity; GO:0015291,s…	PF00083.27:Sugar (and other) transporter	--	--	--
DJ18931	0.3585	0.3737	0.2371	265.142	255.16	224.444	11	15	7	7958	7855	6193	9.70832	1.33363e-181	1.81951e-178	up	GWHBFHJ00000011	33525509	33528341	+	DJ18931	--	K22277 glucan endo-1,6-beta-glucosidase [EC:3.2.1.75] | (RefSeq) probable glucan endo-1,6-beta-glucosidase B (A)	--	probable glucan 1,3-beta-glucosidase A [Olea europaea subsp. europaea]	--	A0A5B7BU40_DAVIN RecName: Full=Cellulase domain-containing protein {ECO:0000259|Pfam:PF00150};	--	GO:0005576,extracellular region; GO:0051015,actin filament binding; GO:0016985,mannan endo-1,4-beta-mannosidase activity; GO:0007015,actin filament organization; GO:0071704,organic substance metabolic process; GO:0003674,molecular_function; GO:0003779,actin binding; GO:0005488,binding; GO:0005515,protein binding; GO:0008092,cytoskeletal protein binding; GO:0044877,protein-containing complex bindi…	PF00150.21:Cellulase (glycosyl hydrolase family 5)	--	--	--
DJ05837	3397.38	2795.93	2938.04	53.8281	38.8494	53.7613	49684	53487	41347	770	570	707	-5.8276	6.35247e-181	8.12521e-178	down	GWHBFHJ00000006	41555053	41556620	+	DJ05837	--	K01602 ribulose-bisphosphate carboxylase small chain [EC:4.1.1.39] | (RefSeq) ribulose bisphosphate carboxylase small chain, chloroplastic-like (A)	ko00630: Glyoxylate and dicarboxylate metabolism; ko00710: Carbon fixation in photosynthetic organisms; ko01100: Metabolic pathways; ko01110: Biosynthesis of secondary metabolites; ko01200: Carbon metabolism	ribulose bisphosphate carboxylase small chain, chloroplastic-like [Olea europaea var. sylvestris]	RBS1B_ARATH RecName: Full=Ribulose bisphosphate carboxylase small subunit 1B, chloroplastic {ECO:0000303|PubMed:9330910}; Short=RuBisCO small subunit 1B; Flags: Precursor;	Q3LFQ4_PANGI RecName: Full=Ribulose bisphosphate carboxylase small subunit, chloroplastic {ECO:0000256|HAMAP-Rule:MF_00860}; Short=RuBisCO small subunit {ECO:0000256|HAMAP-Rule:MF_00860};	--	GO:0048046,apoplast; GO:0009507,chloroplast; GO:0009941,chloroplast envelope; GO:0009570,chloroplast stroma; GO:0009536,plastid; GO:0009579,thylakoid; GO:0003729,mRNA binding; GO:0019904,protein domain specific binding; GO:0009853,photorespiration; GO:0019253,reductive pentose-phosphate cycle; GO:0003674,molecular_function; GO:0003676,nucleic acid binding; GO:0003723,RNA binding; GO:0005488,bindi…	PF00101.23:Ribulose bisphosphate carboxylase, small chain	--	--	--
DJ09456	842.416	791.989	761.802	3.6339	2.7429	5.1641	14694	18071	12787	62	48	81	-7.5687	2.11513e-176	2.54624e-173	down	GWHBFHJ00000008	5664664	5666106	+	DJ09456	--	K00430 peroxidase [EC:1.11.1.7] | (RefSeq) peroxidase 72-like (A)	ko00940: Phenylpropanoid biosynthesis; ko01100: Metabolic pathways; ko01110: Biosynthesis of secondary metabolites	peroxidase 72-like [Olea europaea var. sylvestris]	PER72_ARATH RecName: Full=Peroxidase 72; Short=Atperox P72; EC=1.11.1.7; AltName: Full=ATP6a; AltName: Full=PRXR8; Flags: Precursor;	A0A5B6YJY2_DAVIN RecName: Full=Peroxidase {ECO:0000256|ARBA:ARBA00012313, ECO:0000256|RuleBase:RU362060}; EC=1.11.1.7 {ECO:0000256|ARBA:ARBA00012313, ECO:0000256|RuleBase:RU362060};	--	GO:0005576,extracellular region; GO:0009505,plant-type cell wall; GO:0020037,heme binding; GO:0046872,metal ion binding; GO:0004601,peroxidase activity; GO:0042744,hydrogen peroxide catabolic process; GO:0009809,lignin biosynthetic process; GO:0006979,response to oxidative stress; GO:0003674,molecular_function; GO:0005488,binding; GO:0046906,tetrapyrrole binding; GO:0097159,organic cyclic compoun…	PF00141.26:Peroxidase	--	--	--
DJ07687	0.6797	1.7586	1.0323	1153.35	1269.41	1141.89	13	44	19	21578	24359	19640	10.1206	9.99045e-172	1.13586e-168	up	GWHBFHJ00000007	27163035	27166709	+	DJ07687	--	K08070 2-alkenal reductase [EC:1.3.1.74] | (RefSeq) NADPH-dependent oxidoreductase 2-alkenal reductase (A)	--	2-alkenal reductase (NADP(+)-dependent)-like [Olea europaea subsp. europaea]	AER_ARATH RecName: Full=NADPH-dependent oxidoreductase 2-alkenal reductase {ECO:0000303|PubMed:16299173}; Short=AtAER {ECO:0000303|PubMed:16299173}; EC=1.3.1.- {ECO:0000269|PubMed:10848984}; EC=1.3.1.74 {ECO:0000269|PubMed:12514241, ECO:0000269|PubMed:16299173, ECO:0000269|PubMed:17028190, ECO:0000269|PubMed:26678323}; AltName: Full=NADP-dependent alkenal double bond reductase P1 {ECO:0000303|Pub…	A0A2G9G1R9_9LAMI SubName: Full=Putative NAD-dependent oxidoreductase {ECO:0000313|EMBL:PIM99250.1}; EC=1.3.1.74 {ECO:0000313|EMBL:PIM99250.1};	Predicted NAD-dependent oxidoreductase	GO:0005829,cytosol; GO:0005654,nucleoplasm; GO:0005634,nucleus; GO:0009536,plastid; GO:0032440,2-alkenal reductase [NAD(P)+] activity; GO:0006979,response to oxidative stress; GO:0003674,molecular_function; GO:0003824,catalytic activity; GO:0016491,oxidoreductase activity; GO:0016627,oxidoreductase activity, acting on the CH-CH group of donors; GO:0016628,oxidoreductase activity, acting on the CH…	PF00107.29:Zinc-binding dehydrogenase	--	--	--
DJ31399	1.7106	1.3077	1.0369	190.434	172.809	181.505	48	48	28	5227	4865	4580	7.20595	3.66329e-170	3.94575e-167	up	GWHBFHJ00000005	27958333	27960435	-	DJ31399	--	K01193 beta-fructofuranosidase [EC:3.2.1.26] | (RefSeq) beta-fructofuranosidase, insoluble isoenzyme 1-like (A)	ko00052: Galactose metabolism; ko00500: Starch and sucrose metabolism; ko01100: Metabolic pathways; ko01110: Biosynthesis of secondary metabolites	beta-fructofuranosidase, insoluble isoenzyme 1-like, partial [Olea europaea subsp. europaea]	INV1_DAUCA RecName: Full=Beta-fructofuranosidase, insoluble isoenzyme 1; EC=3.2.1.26; AltName: Full=Cell wall beta-fructosidase 1; AltName: Full=Invertase 1; AltName: Full=Sucrose hydrolase 1; Flags: Precursor;	A0A6I9T6S8_SESIN SubName: Full=beta-fructofuranosidase, insoluble isoenzyme 1-like {ECO:0000313|RefSeq:XP_011077846.1};	Beta-fructofuranosidase (invertase)	GO:0005576,extracellular region; GO:0004564,beta-fructofuranosidase activity; GO:0005975,carbohydrate metabolic process; GO:0003674,molecular_function; GO:0003824,catalytic activity; GO:0004553,hydrolase activity, hydrolyzing O-glycosyl compounds; GO:0016787,hydrolase activity; GO:0016798,hydrolase activity, acting on glycosyl bonds; GO:0008150,biological_process; GO:0008152,metabolic process; GO…	PF00251.23:Glycosyl hydrolases family 32 N-terminal domain	--	--	--
DJ12462	3.9098	4.768	6.1912	569.306	691.733	622.476	42	67	64	5982	7455	6013	7.14952	2.27579e-168	2.3287e-165	up	GWHBFHJ00000009	8522134	8522739	+	DJ12462	--	K25075 pterocarpan synthase [EC:4.2.1.139] | (RefSeq) dirigent protein 1 (A)	ko00943: Isoflavonoid biosynthesis; ko01100: Metabolic pathways; ko01110: Biosynthesis of secondary metabolites	Hypothetical predicted protein [Olea europaea subsp. europaea]	DIR21_ARATH RecName: Full=Dirigent protein 21; Short=AtDIR21; Flags: Precursor;	A0A6I9TXJ1_SESIN RecName: Full=Dirigent protein {ECO:0000256|RuleBase:RU363099};	--	GO:0005576,extracellular region; GO:0009699,phenylpropanoid biosynthetic process; GO:0006725,cellular aromatic compound metabolic process; GO:0008150,biological_process; GO:0008152,metabolic process; GO:0009058,biosynthetic process; GO:0009698,phenylpropanoid metabolic process; GO:0009987,cellular process; GO:0019438,aromatic compound biosynthetic process; GO:0019748,secondary metabolic process; …	PF03018.17:Dirigent-like protein	--	--	--
DJ06729	4.1788	3.1057	6.0312	788.197	945.487	956.373	36	35	50	6642	8172	7409	7.83985	1.72564e-166	1.68167e-163	up	GWHBFHJ00000007	5795687	5796459	+	DJ06729	--	K05387 glutamate receptor, ionotropic, plant | (RefSeq) LOW QUALITY PROTEIN: glutamate receptor 2.3-like (A)	--	major allergen Pru ar 1-like [Olea europaea var. sylvestris]	PRU1_PRUAR RecName: Full=Major allergen Pru ar 1; AltName: Allergen=Pru ar 1;	A0A5J5AAS6_9ASTE RecName: Full=Bet_v_1 domain-containing protein {ECO:0000259|SMART:SM01037};	--	GO:0010427,abscisic acid binding; GO:0004864,protein phosphatase inhibitor activity; GO:0038023,signaling receptor activity; GO:0009738,abscisic acid-activated signaling pathway; GO:0006952,defense response; GO:0009607,response to biotic stimulus; GO:0003674,molecular_function; GO:0005488,binding; GO:0008289,lipid binding; GO:0019840,isoprenoid binding; GO:0031406,carboxylic acid binding; GO:0033…	PF00407.22:Pathogenesis-related protein Bet v 1 family	--	--	--
DJ17042	1.2894	1.6429	0.7816	424.418	344.284	416.017	24	40	14	7727	6429	6963	8.42069	2.08479e-162	1.93933e-159	up	GWHBFHJ00000011	2386049	2388757	+	DJ17042	--	K01456 peptide-N4-(N-acetyl-beta-glucosaminyl)asparagine amidase [EC:3.5.1.52] | (RefSeq) peptide-N(4)-(N-acetyl-beta- glucosaminyl)asparagine amidase isoform X1 (A)	ko04141: Protein processing in endoplasmic reticulum	auxin-induced protein PCNT115-like [Olea europaea var. sylvestris]	AKR2_ORYSJ RecName: Full=Probable aldo-keto reductase 2; EC=1.1.1.-;	A0A6P6WQP8_COFAR SubName: Full=auxin-induced protein PCNT115-like {ECO:0000313|RefSeq:XP_027117001.1};	Voltage-gated shaker-like K+ channel, subunit beta/KCNAB	GO:0005737,cytoplasm; GO:0004033,aldo-keto reductase (NADP) activity; GO:0003674,molecular_function; GO:0003824,catalytic activity; GO:0016491,oxidoreductase activity; GO:0016614,oxidoreductase activity, acting on CH-OH group of donors; GO:0016616,oxidoreductase activity, acting on the CH-OH group of donors, NAD or NADP as acceptor; GO:0005575,cellular_component; GO:0005622,intracellular anatomic…	PF00248.24:Aldo/keto reductase family	--	--	--
DJ13057	0.1945	0.0991	0.3369	3504	3060.3	2558.76	3	2	5	52858	47350	35485	14.0406	5.21294e-160	4.63838e-157	up	GWHBFHJ00000009	24697963	24698832	-	DJ13057	--	K01051 pectinesterase [EC:3.1.1.11] | (RefSeq) pectinesterase 2 (A)	ko00040: Pentose and glucuronate interconversions; ko01100: Metabolic pathways	pectinesterase 2 [Olea europaea subsp. europaea]	PME17_ARATH RecName: Full=Probable pectinesterase/pectinesterase inhibitor 17; Includes: RecName: Full=Pectinesterase inhibitor 17; AltName: Full=Pectin methylesterase inhibitor 17; Includes: RecName: Full=Pectinesterase 17; Short=PE 17; EC=3.1.1.11; AltName: Full=Pectin methylesterase 17; Short=AtPME17; Flags: Precursor;	A0A5B6YIX0_DAVIN RecName: Full=Pectinesterase {ECO:0000256|ARBA:ARBA00013229, ECO:0000256|RuleBase:RU000589}; EC=3.1.1.11 {ECO:0000256|ARBA:ARBA00013229, ECO:0000256|RuleBase:RU000589};	--	GO:0005576,extracellular region; GO:0045330,aspartyl esterase activity; GO:0030599,pectinesterase activity; GO:0046910,pectinesterase inhibitor activity; GO:0042545,cell wall modification; GO:0050829,defense response to Gram-negative bacterium; GO:0045490,pectin catabolic process; GO:0009617,response to bacterium; GO:0009620,response to fungus; GO:0003674,molecular_function; GO:0003824,catalytic …	PF04043.18:Plant invertase/pectin methylesterase inhibitor	--	--	--
DJ04506	0.1385	0.3706	0.1799	441.77	445.313	364.005	4	14	5	12478	12901	9452	10.9076	3.33808e-158	2.84641e-155	up	GWHBFHJ00000006	27179586	27183057	+	DJ04506	--	K22425 oleuropein beta-glucosidase [EC:3.2.1.206] | (RefSeq) beta-glucosidase (A)	--	beta-glucosidase-like [Olea europaea subsp. europaea]	BGLC_OLEEU RecName: Full=Oleuropein beta-glucosidase {ECO:0000305}; EC=3.2.1.206 {ECO:0000269|PubMed:25697790}; AltName: Full=Beta-glucosidase {ECO:0000303|PubMed:25697790}; Short=OeGLU {ECO:0000303|PubMed:25697790};	A0A6I9T407_SESIN SubName: Full=beta-glucosidase-like {ECO:0000313|RefSeq:XP_011077708.1};	Beta-glucosidase, lactase phlorizinhydrolase, and related proteins	GO:0005634,nucleus; GO:0008422,beta-glucosidase activity; GO:0043621,protein self-association; GO:0005975,carbohydrate metabolic process; GO:0006952,defense response; GO:0051259,protein complex oligomerization; GO:0003674,molecular_function; GO:0003824,catalytic activity; GO:0004553,hydrolase activity, hydrolyzing O-glycosyl compounds; GO:0015926,glucosidase activity; GO:0016787,hydrolase activit…	PF00232.21:Glycosyl hydrolase family 1	--	--	--
DJ02564	0.4223	0.5947	0.5775	56.6731	57.1821	56.4558	19	35	25	2494	2581	2284	6.87713	6.21724e-156	5.08943e-153	up	GWHBFHJ00000001	41458992	41462006	-	DJ02564	--	K04733 interleukin-1 receptor-associated kinase 4 [EC:2.7.11.1] | (RefSeq) G-type lectin S-receptor-like serine/threonine-protein kinase RKS1 (A)	--	G-type lectin S-receptor-like serine threonine-kinase At1g11300 [Olea europaea subsp. europaea]	SD113_ARATH RecName: Full=G-type lectin S-receptor-like serine/threonine-protein kinase SD1-13; EC=2.7.11.1; AltName: Full=Calmodulin-binding receptor-like protein kinase 1; AltName: Full=Receptor-like protein kinase 2; AltName: Full=S-domain-1 (SD1) receptor kinase 13; Short=SD1-13; Flags: Precursor;	A0A8M8V0D2_SESIN SubName: Full=G-type lectin S-receptor-like serine/threonine-protein kinase At1g11300 {ECO:0000313|RefSeq:XP_020552107.1};	--	GO:0005576,extracellular region; GO:0016021,integral component of membrane; GO:0005886,plasma membrane; GO:0005524,ATP binding; GO:0005516,calmodulin binding; GO:0030246,carbohydrate binding; GO:0004672,protein kinase activity; GO:0106310,protein serine kinase activity; GO:0004674,protein serine/threonine kinase activity; GO:0031625,ubiquitin protein ligase binding; GO:0071446,cellular response t…	PF07714.20:Protein tyrosine and serine/threonine kinase	--	--	--
DJ26010	4.6178	6.4051	4.7492	547.917	643.957	612.148	97	176	96	11258	13571	11563	6.97752	3.72145e-155	2.92921e-152	up	GWHBFHJ00000003	3057301	3058591	-	DJ26010	--	K08287 dual-specificity kinase [EC:2.7.12.1] | (RefSeq) serine/threonine-protein kinase AFC2-like (A)	--	cytochrome b561 and DOMON domain-containing protein At4g17280-like [Olea europaea var. sylvestris]	B561P_ARATH RecName: Full=Cytochrome b561 and DOMON domain-containing protein At5g35735; AltName: Full=Protein b561A.tha16; Flags: Precursor;	A0A022RW52_ERYGU RecName: Full=Cytochrome b561 and DOMON domain-containing protein {ECO:0000256|PIRNR:PIRNR037471};	Predicted membrane protein, contains DoH and Cytochrome b-561/ferric reductase transmembrane domains	GO:0016021,integral component of membrane; GO:0046872,metal ion binding; GO:0071456,cellular response to hypoxia; GO:0003674,molecular_function; GO:0005488,binding; GO:0043167,ion binding; GO:0043169,cation binding; GO:0001666,response to hypoxia; GO:0006950,response to stress; GO:0008150,biological_process; GO:0009628,response to abiotic stimulus; GO:0009987,cellular process; GO:0033554,cellular…	PF04526.16:Protein of unknown function (DUF568)	--	--	--
DJ20053	4.2169	4.4423	6.9471	373.271	379.92	468.648	82	113	130	7100	7412	8195	6.45538	5.54229e-154	4.20085e-151	up	GWHBFHJ00000012	7027609	7029020	-	DJ20053	--	K13229 2,4-dihydroxy-1,4-benzoxazin-3-one-glucoside dioxygenase [EC:1.14.11.59] | (RefSeq) DIBOA-glucoside dioxygenase BX6 (A)	ko00402: Benzoxazinoid biosynthesis; ko00999: Biosynthesis of various plant secondary metabolites; ko01100: Metabolic pathways; ko01110: Biosynthesis of secondary metabolites	1-aminocyclopropane-1-carboxylate oxidase homolog 1-like [Olea europaea subsp. europaea]	ACCH1_ARATH RecName: Full=1-aminocyclopropane-1-carboxylate oxidase homolog 1;	A0A5H2Q8Y6_SCODU SubName: Full=2-oxoglutarate-dependent dioxygenase {ECO:0000313|EMBL:AYC63496.1};	Iron/ascorbate family oxidoreductases	GO:0046872,metal ion binding; GO:0016491,oxidoreductase activity; GO:0003674,molecular_function; GO:0005488,binding; GO:0043167,ion binding; GO:0043169,cation binding; GO:0003824,catalytic activity	PF03171.23:2OG-Fe(II) oxygenase superfamily	--	--	--
DJ12545	0.2145	0.1913	0.1486	256.166	231.474	240.839	6	7	4	7009	6496	6058	10.4922	5.33322e-152	3.89801e-149	up	GWHBFHJ00000009	9783049	9786284	-	DJ12545	--	K26385 lysine histidine transporter | (RefSeq) lysine histidine transporter-like 8 isoform X1 (A)	--	lysine histidine transporter-like 8 [Olea europaea subsp. europaea]	LHTL8_ARATH RecName: Full=Lysine histidine transporter-like 8; AltName: Full=Amino acid transporter-like protein 1;	A0A022RD99_ERYGU RecName: Full=Aa_trans domain-containing protein {ECO:0000259|Pfam:PF01490};	Amino acid transporters	GO:0016021,integral component of membrane; GO:0016020,membrane; GO:0005886,plasma membrane; GO:0015171,amino acid transmembrane transporter activity; GO:0003333,amino acid transmembrane transport; GO:0003674,molecular_function; GO:0005215,transporter activity; GO:0005342,organic acid transmembrane transporter activity; GO:0022857,transmembrane transporter activity; GO:0046943,carboxylic acid tran…	PF01490.21:Transmembrane amino acid transporter protein	--	--	--
DJ24806	2.8391	3.4565	4.8625	367.269	456.281	427.621	54	86	89	6833	8707	7314	6.9781	8.59983e-152	6.06881e-149	up	GWHBFHJ00000002	14460786	14463766	+	DJ24806	--	K13265 vestitone reductase [EC:1.1.1.348] | (RefSeq) vestitone reductase (A)	ko00943: Isoflavonoid biosynthesis; ko01100: Metabolic pathways; ko01110: Biosynthesis of secondary metabolites	vestitone reductase-like [Olea europaea var. sylvestris]	VESTR_MEDSA RecName: Full=Vestitone reductase; EC=1.1.1.348 {ECO:0000269|PubMed:7625843, ECO:0000269|PubMed:8071365};	A0A6I9U278_SESIN SubName: Full=vestitone reductase isoform X2 {ECO:0000313|RefSeq:XP_011090658.1};	Flavonol reductase/cinnamoyl-CoA reductase	GO:0016491,oxidoreductase activity; GO:0006952,defense response; GO:0009813,flavonoid biosynthetic process; GO:0003674,molecular_function; GO:0003824,catalytic activity; GO:0006950,response to stress; GO:0008150,biological_process; GO:0050896,response to stimulus; GO:0008152,metabolic process; GO:0009058,biosynthetic process; GO:0009812,flavonoid metabolic process; GO:0071704,organic substance me…	PF01370.24:NAD dependent epimerase/dehydratase family	--	--	--
DJ27820	0.501	0.9192	0.9892	254.509	258.425	211.324	10	24	19	4969	5175	3793	8.3751	2.32242e-151	1.58428e-148	up	GWHBFHJ00000003	32127498	32128854	+	DJ27820	--	K05863 solute carrier family 25 (mitochondrial adenine nucleotide translocator), member 4/5/6/31 | (RefSeq) ADP,ATP carrier protein 1, mitochondrial-like (A)	--	ADP,ATP carrier 1, mitochondrial-like [Olea europaea subsp. europaea]	ADT3_ARATH RecName: Full=ADP,ATP carrier protein 3, mitochondrial; AltName: Full=ADP/ATP translocase 3; AltName: Full=Adenine nucleotide translocator 3; Short=ANT 3; Flags: Precursor;	A0A2G9HCF9_9LAMI RecName: Full=ADP/ATP translocase {ECO:0000256|RuleBase:RU368008}; AltName: Full=ADP,ATP carrier protein {ECO:0000256|RuleBase:RU368008};	Mitochondrial ADP/ATP carrier proteins	GO:0009941,chloroplast envelope; GO:0016021,integral component of membrane; GO:0016020,membrane; GO:0005743,mitochondrial inner membrane; GO:0005739,mitochondrion; GO:0005886,plasma membrane; GO:0005471,ATP:ADP antiporter activity; GO:0140021,mitochondrial ADP transmembrane transport; GO:1990544,mitochondrial ATP transmembrane transport; GO:0015865,purine nucleotide transport; GO:0000295,adenine …	PF00153.30:Mitochondrial carrier protein	--	--	--
DJ18930	0.2918	0.2974	0.3706	331.586	516.858	368.293	9	12	11	10004	15994	10215	10.4804	3.04782e-151	2.01205e-148	up	GWHBFHJ00000011	33498228	33503197	+	DJ18930	--	K22277 glucan endo-1,6-beta-glucosidase [EC:3.2.1.75] | (RefSeq) probable glucan endo-1,6-beta-glucosidase B (A)	--	probable glucan 1,3-beta-glucosidase A [Olea europaea subsp. europaea]	--	A0A5B7BU40_DAVIN RecName: Full=Cellulase domain-containing protein {ECO:0000259|Pfam:PF00150};	--	GO:0005576,extracellular region; GO:0051015,actin filament binding; GO:0016985,mannan endo-1,4-beta-mannosidase activity; GO:0007015,actin filament organization; GO:0071704,organic substance metabolic process; GO:0003674,molecular_function; GO:0003779,actin binding; GO:0005488,binding; GO:0005515,protein binding; GO:0008092,cytoskeletal protein binding; GO:0044877,protein-containing complex bindi…	PF00150.21:Cellulase (glycosyl hydrolase family 5)	--	--	--
DJ00576	2.7379	2.99	2.6263	97.5672	85.6786	104.189	91	130	84	3172	2857	3114	5.239	1.29389e-150	8.27485e-148	up	GWHBFHJ00000001	4619152	4621728	-	DJ00576	--	K04733 interleukin-1 receptor-associated kinase 4 [EC:2.7.11.1] | (RefSeq) proline-rich receptor-like protein kinase PERK12 (A)	--	wall-associated receptor kinase-like 20 [Olea europaea subsp. europaea]	WAKLQ_ARATH RecName: Full=Wall-associated receptor kinase-like 20; EC=2.7.11.-; Flags: Precursor;	A0A6I9TIL5_SESIN SubName: Full=wall-associated receptor kinase-like 20 {ECO:0000313|RefSeq:XP_011085014.1};	Serine/threonine protein kinase	GO:0016021,integral component of membrane; GO:0005886,plasma membrane; GO:0005524,ATP binding; GO:0106310,protein serine kinase activity; GO:0004674,protein serine/threonine kinase activity; GO:0007166,cell surface receptor signaling pathway; GO:0006468,protein phosphorylation; GO:0000166,nucleotide binding; GO:0003674,molecular_function; GO:0005488,binding; GO:0017076,purine nucleotide binding; …	PF00069.28:Protein kinase domain	--	--	--
DJ05500	40.8194	37.2818	38.1288	895.884	926.337	991.166	267	319	240	5732	6079	5830	4.7444	4.19144e-149	2.59933e-146	up	GWHBFHJ00000006	38783884	38784252	-	DJ05500	--	K17278 membrane-associated progesterone receptor component | (RefSeq) membrane steroid-binding protein 2-like (A)	--	membrane steroid-binding 2-like [Olea europaea subsp. europaea]	MSBP2_ARATH RecName: Full=Membrane steroid-binding protein 2; Short=AtMP2; AltName: Full=Membrane-associated progesterone-binding protein 3 {ECO:0000303|Ref.5}; Short=AtMAPR3 {ECO:0000303|Ref.5};	A0A2C9UI66_MANES RecName: Full=Cytochrome b5 heme-binding domain-containing protein {ECO:0000259|SMART:SM01117};	Putative steroid membrane receptor Hpr6.6/25-Dx	GO:0009535,chloroplast thylakoid membrane; GO:0005829,cytosol; GO:0012505,endomembrane system; GO:0005783,endoplasmic reticulum; GO:0016021,integral component of membrane; GO:0016020,membrane; GO:0005886,plasma membrane; GO:0019904,protein domain specific binding; GO:0005496,steroid binding; GO:0003674,molecular_function; GO:0005488,binding; GO:0005515,protein binding; GO:0008289,lipid binding; G…	PF00173.31:Cytochrome b5-like Heme/Steroid binding domain	--	--	--
novel.3351	0.0626	0.0266	0.0795	35.9896	37.1626	36.2925	9	5	11	5059	5358	4690	9.55412	8.78352e-149	5.2869e-146	up	GWHBFHJ00000011	33872767	33883459	+	--	--	K03006 DNA-directed RNA polymerase II subunit RPB1 [EC:2.7.7.6] | (RefSeq) LOW QUALITY PROTEIN: DNA-directed RNA polymerase II subunit RPB1-like (A)	ko03020: RNA polymerase; ko03420: Nucleotide excision repair	Retrovirus-related Pol polyprotein from transposon TNT 1-94 [Cajanus cajan]	POLX_TOBAC RecName: Full=Retrovirus-related Pol polyprotein from transposon TNT 1-94; Includes: RecName: Full=Protease; EC=3.4.23.-; Includes: RecName: Full=Reverse transcriptase; EC=2.7.7.49; Includes: RecName: Full=Endonuclease;	A0A151RCT9_CAJCA SubName: Full=Retrovirus-related Pol polyprotein from transposon TNT 1-94 {ECO:0000313|EMBL:KYP40337.1}; EC=1.2.1.27 {ECO:0000313|EMBL:KYP40337.1};	FOG: Transposon-encoded proteins with TYA, reverse transcriptase, integrase domains in various combinations	GO:0004190,aspartic-type endopeptidase activity; GO:0004519,endonuclease activity; GO:0003676,nucleic acid binding; GO:0003964,RNA-directed DNA polymerase activity; GO:0008270,zinc ion binding; GO:0015074,DNA integration; GO:0006508,proteolysis; GO:0003674,molecular_function; GO:0003824,catalytic activity; GO:0004175,endopeptidase activity; GO:0008233,peptidase activity; GO:0016787,hydrolase acti…	PF07727.17:Reverse transcriptase (RNA-dependent DNA polymerase)	--	--	--
DJ30584	10.7662	11.6621	10.4861	479.701	467.892	395.402	271	384	254	11811	11816	8950	5.49519	1.0018e-147	5.85764e-145	up	GWHBFHJ00000005	18708790	18710615	-	DJ30584	--	K01183 chitinase [EC:3.2.1.14] | (RefSeq) acidic mammalian chitinase-like (A)	ko00520: Amino sugar and nucleotide sugar metabolism; ko01100: Metabolic pathways	acidic mammalian chitinase-like [Olea europaea subsp. europaea]	NFH1_MEDTR RecName: Full=Nod factor hydrolase protein 1 {ECO:0000303|PubMed:24082029}; Short=MtNFH1 {ECO:0000303|PubMed:24082029}; AltName: Full=Class V chitinase NFH1 {ECO:0000305}; AltName: Full=Mtchit5 {ECO:0000303|PubMed:15107993}; Flags: Precursor;	A0A5B7BN03_DAVIN SubName: Full=Putative chitinase-like protein 4 {ECO:0000313|EMBL:MPA69221.1}; EC=3.2.1.14 {ECO:0000313|EMBL:MPA69221.1};	Chitinase	GO:0005576,extracellular region; GO:0008061,chitin binding; GO:0004568,chitinase activity; GO:0016787,hydrolase activity; GO:0005975,carbohydrate metabolic process; GO:0006032,chitin catabolic process; GO:0009877,nodulation; GO:0003674,molecular_function; GO:0005488,binding; GO:0097367,carbohydrate derivative binding; GO:0003824,catalytic activity; GO:0004553,hydrolase activity, hydrolyzing O-gly…	PF00704.31:Glycosyl hydrolases family 18	--	--	--
DJ27679	1424.47	1026.12	1079.57	7.5313	7.3428	10.8864	28811	27149	21012	149	149	198	-6.96041	4.68364e-146	2.66252e-143	down	GWHBFHJ00000003	31013348	31014960	+	DJ27679	--	K08909 light-harvesting complex I chlorophyll a/b binding protein 3 | (RefSeq) chlorophyll a-b binding protein 8, chloroplastic (A)	ko00196: Photosynthesis - antenna proteins; ko01100: Metabolic pathways	chlorophyll a-b binding protein 8, chloroplastic [Olea europaea var. sylvestris]	CB13_SOLLC RecName: Full=Chlorophyll a-b binding protein 8, chloroplastic; AltName: Full=LHCI type III CAB-8; Flags: Precursor;	A0A6I9UHJ9_SESIN RecName: Full=Chlorophyll a-b binding protein, chloroplastic {ECO:0000256|RuleBase:RU363080};	--	GO:0009535,chloroplast thylakoid membrane; GO:0016021,integral component of membrane; GO:0009522,photosystem I; GO:0009523,photosystem II; GO:0016168,chlorophyll binding; GO:0046872,metal ion binding; GO:0009768,photosynthesis, light harvesting in photosystem I; GO:0009416,response to light stimulus; GO:0003674,molecular_function; GO:0005488,binding; GO:0046906,tetrapyrrole binding; GO:0097159,or…	PF00504.24:Chlorophyll A-B binding protein	--	--	--
DJ26848	0.1385	0.5295	0.1799	669.912	684.625	595.493	4	20	5	18922	19834	15463	11.2341	5.26179e-146	2.91034e-143	up	GWHBFHJ00000003	22433942	22437447	+	DJ26848	--	K22425 oleuropein beta-glucosidase [EC:3.2.1.206] | (RefSeq) beta-glucosidase (A)	--	beta-glucosidase-like [Olea europaea subsp. europaea]	BGLC_OLEEU RecName: Full=Oleuropein beta-glucosidase {ECO:0000305}; EC=3.2.1.206 {ECO:0000269|PubMed:25697790}; AltName: Full=Beta-glucosidase {ECO:0000303|PubMed:25697790}; Short=OeGLU {ECO:0000303|PubMed:25697790};	A0A6I9T407_SESIN SubName: Full=beta-glucosidase-like {ECO:0000313|RefSeq:XP_011077708.1};	Beta-glucosidase, lactase phlorizinhydrolase, and related proteins	GO:0005634,nucleus; GO:0008422,beta-glucosidase activity; GO:0043621,protein self-association; GO:0005975,carbohydrate metabolic process; GO:0006952,defense response; GO:0051259,protein complex oligomerization; GO:0003674,molecular_function; GO:0003824,catalytic activity; GO:0004553,hydrolase activity, hydrolyzing O-glycosyl compounds; GO:0015926,glucosidase activity; GO:0016787,hydrolase activit…	PF00232.21:Glycosyl hydrolase family 1	--	--	--
DJ31435	0.4234	0.1349	0.4766	365.947	426.767	331.64	12	5	13	10146	12136	8453	10.3037	1.22006e-145	6.57067e-143	up	GWHBFHJ00000005	28206740	28211357	-	DJ31435	--	K22425 oleuropein beta-glucosidase [EC:3.2.1.206] | (RefSeq) raucaffricine-O-beta-D-glucosidase-like (A)	--	beta-glucosidase-like isoform X2 [Olea europaea var. sylvestris]	BGLC_OLEEU RecName: Full=Oleuropein beta-glucosidase {ECO:0000305}; EC=3.2.1.206 {ECO:0000269|PubMed:25697790}; AltName: Full=Beta-glucosidase {ECO:0000303|PubMed:25697790}; Short=OeGLU {ECO:0000303|PubMed:25697790};	A0A6I9T407_SESIN SubName: Full=beta-glucosidase-like {ECO:0000313|RefSeq:XP_011077708.1};	Beta-glucosidase, lactase phlorizinhydrolase, and related proteins	GO:0005634,nucleus; GO:0008422,beta-glucosidase activity; GO:0043621,protein self-association; GO:0005975,carbohydrate metabolic process; GO:0006952,defense response; GO:0051259,protein complex oligomerization; GO:0003674,molecular_function; GO:0003824,catalytic activity; GO:0004553,hydrolase activity, hydrolyzing O-glycosyl compounds; GO:0015926,glucosidase activity; GO:0016787,hydrolase activit…	PF00232.21:Glycosyl hydrolase family 1	--	--	--
DJ16477	1.5188	1.1611	1.5032	146.992	111.81	133.431	21	21	20	1988	1551	1659	6.7045	1.67039e-139	8.76526e-137	up	GWHBFHJ00000010	33345427	33346681	+	DJ16477	--	K12900 serine/arginine-rich splicing factor 10 | (RefSeq) serine/arginine-rich SC35-like splicing factor SCL30A (A)	ko03040: Spliceosome	ethylene-responsive transcription factor ERF114-like [Olea europaea var. sylvestris]	EF114_ARATH RecName: Full=Ethylene-responsive transcription factor ERF114 {ECO:0000303|PubMed:16407444}; AltName: Full=ERF bud enhancer {ECO:0000303|PubMed:23616605};	A0A4D9AAM0_SALSN RecName: Full=AP2/ERF domain-containing protein {ECO:0000259|PROSITE:PS51032};	--	GO:0005634,nucleus; GO:0003700,DNA-binding transcription factor activity; GO:0000976,transcription cis-regulatory region binding; GO:0050832,defense response to fungus; GO:0009873,ethylene-activated signaling pathway; GO:0003674,molecular_function; GO:0140110,transcription regulator activity; GO:0001067,transcription regulatory region nucleic acid binding; GO:0003676,nucleic acid binding; GO:0003…	PF00847.23:AP2 domain	AP2/ERF-ERF	TF	AP2/ERF->AP2/ERF-ERF
DJ22729	11.5276	10.7584	10.8312	394.651	461.541	542.307	480	586	434	16074	19281	20306	5.54826	2.60295e-139	1.33174e-136	up	GWHBFHJ00000013	14778022	14782238	+	DJ22729	--	K00276 primary-amine oxidase [EC:1.4.3.21] | (RefSeq) primary amine oxidase-like isoform X1 (A)	ko00260: Glycine, serine and threonine metabolism; ko00350: Tyrosine metabolism; ko00360: Phenylalanine metabolism; ko00410: beta-Alanine metabolism; ko00950: Isoquinoline alkaloid biosynthesis; ko00960: Tropane, piperidine and pyridine alkaloid biosynthesis; ko01100: Metabolic pathways; ko01110: Biosynthesis of secondary metabolites	primary amine oxidase-like isoform X1 [Olea europaea var. sylvestris]	CAOG1_ARATH RecName: Full=Amine oxidase [copper-containing] gamma 1 {ECO:0000303|PubMed:31862580}; Short=AtCuAO1 {ECO:0000303|PubMed:21471330, ECO:0000303|PubMed:23915037}; Short=AtCuAOgamma1 {ECO:0000303|PubMed:31862580}; Short=Copper amine oxidase 1 {ECO:0000303|PubMed:21471330}; EC=1.4.3.21 {ECO:0000269|PubMed:23915037}; AltName: Full=Primary amine oxidase 1 {ECO:0000305}; Flags: Precursor;	A0A2G9GBZ9_9LAMI RecName: Full=Amine oxidase {ECO:0000256|RuleBase:RU000672}; EC=1.4.3.- {ECO:0000256|RuleBase:RU000672};	Copper amine oxidase	GO:0005615,extracellular space; GO:0052595,aliphatic amine oxidase activity; GO:0052594,aminoacetone:oxygen oxidoreductase(deaminating) activity; GO:0005507,copper ion binding; GO:0052596,phenethylamine:oxygen oxidoreductase (deaminating) activity; GO:0008131,primary amine oxidase activity; GO:0048038,quinone binding; GO:0052593,tryptamine:oxygen oxidoreductase (deaminating) activity; GO:0009738,…	PF01179.23:Copper amine oxidase, enzyme domain	--	--	--
DJ26525	0.4949	0.1351	0.551	253.602	240.314	311.666	14	5	15	7018	6821	7929	9.62322	6.87239e-137	3.43033e-134	up	GWHBFHJ00000003	16707902	16709497	-	DJ26525	--	K22395 cinnamyl-alcohol dehydrogenase [EC:1.1.1.195] | (RefSeq) berberine bridge enzyme-like 13 (A)	ko00940: Phenylpropanoid biosynthesis; ko01100: Metabolic pathways; ko01110: Biosynthesis of secondary metabolites	berberine bridge enzyme-like 18 [Olea europaea subsp. europaea]	STOX_BERWI RecName: Full=Tetrahydroberberine oxidase {ECO:0000303|PubMed:3402447}; Short=THB oxidase {ECO:0000305}; EC=1.3.3.8 {ECO:0000269|PubMed:21327819, ECO:0000269|PubMed:3402447}; AltName: Full=(S)-tetrahydroprotoberberine oxidase {ECO:0000303|PubMed:21327819}; Short=BwSTOX {ECO:0000303|PubMed:21327819}; Flags: Precursor;	A0A8M8VCL5_SESIN SubName: Full=berberine bridge enzyme-like 18 {ECO:0000313|RefSeq:XP_020554265.1};	--	GO:0071949,FAD binding; GO:0050328,tetrahydroberberine oxidase activity; GO:0000166,nucleotide binding; GO:0003674,molecular_function; GO:0005488,binding; GO:0036094,small molecule binding; GO:0043167,ion binding; GO:0043168,anion binding; GO:0050660,flavin adenine dinucleotide binding; GO:0097159,organic cyclic compound binding; GO:1901265,nucleoside phosphate binding; GO:1901363,heterocyclic co…	PF01565.26:FAD binding domain	--	--	--
DJ20480	0.2833	0.1624	0.2208	135.294	133.355	140.591	8	6	6	3737	3778	3570	9.43633	5.81348e-136	2.83269e-133	up	GWHBFHJ00000012	11723506	11726318	+	DJ20480	--	--	--	uncharacterized protein LOC111371543 isoform X2 [Olea europaea var. sylvestris]	--	A0A6I9STK3_SESIN SubName: Full=uncharacterized protein LOC105158774 {ECO:0000313|RefSeq:XP_011073937.1};	--	GO:0016021,integral component of membrane; GO:0005575,cellular_component; GO:0016020,membrane; GO:0031224,intrinsic component of membrane; GO:0110165,cellular anatomical entity	PF09972.12:Predicted membrane protein (DUF2207)	--	--	--
DJ17062	42.914	26.6198	40.3706	1736.34	1748.46	1881.68	1119	908	1013	44287	45741	44122	5.76626	1.31512e-134	6.25906e-132	up	GWHBFHJ00000011	2563386	2566494	+	DJ17062	--	K01456 peptide-N4-(N-acetyl-beta-glucosaminyl)asparagine amidase [EC:3.5.1.52] | (RefSeq) peptide-N(4)-(N-acetyl-beta- glucosaminyl)asparagine amidase isoform X1 (A)	ko04141: Protein processing in endoplasmic reticulum	auxin-induced protein PCNT115-like [Olea europaea var. sylvestris]	AKR2_ORYSJ RecName: Full=Probable aldo-keto reductase 2; EC=1.1.1.-;	A0A6P6WQP8_COFAR SubName: Full=auxin-induced protein PCNT115-like {ECO:0000313|RefSeq:XP_027117001.1};	Voltage-gated shaker-like K+ channel, subunit beta/KCNAB	GO:0005737,cytoplasm; GO:0004033,aldo-keto reductase (NADP) activity; GO:0003674,molecular_function; GO:0003824,catalytic activity; GO:0016491,oxidoreductase activity; GO:0016614,oxidoreductase activity, acting on CH-OH group of donors; GO:0016616,oxidoreductase activity, acting on the CH-OH group of donors, NAD or NADP as acceptor; GO:0005575,cellular_component; GO:0005622,intracellular anatomic…	PF00248.24:Aldo/keto reductase family	--	--	--
DJ25268	1413.78	972.011	935.157	2.9339	1.9615	1.3678	17242	15507	10975	35	24	15	-8.9111	2.50916e-134	1.16704e-131	down	GWHBFHJ00000002	25338731	25339418	+	DJ25268	--	K02639 ferredoxin | (RefSeq) ferredoxin-B-like (A)	ko00195: Photosynthesis; ko01100: Metabolic pathways	ferredoxin-B-like [Olea europaea var. sylvestris]	FER_CAPAN RecName: Full=Ferredoxin, chloroplastic; AltName: Full=PFLP; Flags: Precursor;	A0A2G2W8S9_CAPBA RecName: Full=Ferredoxin {ECO:0000256|RuleBase:RU364001};	--	GO:0009507,chloroplast; GO:0051537,2 iron, 2 sulfur cluster binding; GO:0009055,electron transfer activity; GO:0046872,metal ion binding; GO:0006124,ferredoxin metabolic process; GO:0003674,molecular_function; GO:0005488,binding; GO:0051536,iron-sulfur cluster binding; GO:0051540,metal cluster binding; GO:0003824,catalytic activity; GO:0016491,oxidoreductase activity; GO:0043167,ion binding; GO:0…	PF00111.30:2Fe-2S iron-sulfur cluster binding domain	--	--	--
DJ09695	0.9522	0.6492	1.0698	52.3845	52.8177	57.6971	37	33	40	1991	2059	2016	6.10127	6.00627e-134	2.73152e-131	up	GWHBFHJ00000008	8055333	8059505	+	DJ09695	--	K04733 interleukin-1 receptor-associated kinase 4 [EC:2.7.11.1] | (RefSeq) G-type lectin S-receptor-like serine/threonine-protein kinase RKS1 isoform X1 (A)	--	receptor kinase At4g00960 [Olea europaea subsp. europaea]	CRK29_ARATH RecName: Full=Cysteine-rich receptor-like protein kinase 29; Short=Cysteine-rich RLK29; EC=2.7.11.-; Flags: Precursor;	A0A6I9T3H7_SESIN SubName: Full=putative receptor-like protein kinase At4g00960 {ECO:0000313|RefSeq:XP_011076612.1};	--	GO:0016021,integral component of membrane; GO:0005886,plasma membrane; GO:0005773,vacuole; GO:0005524,ATP binding; GO:0106310,protein serine kinase activity; GO:0004674,protein serine/threonine kinase activity; GO:0006468,protein phosphorylation; GO:0009737,response to abscisic acid; GO:0000166,nucleotide binding; GO:0003674,molecular_function; GO:0005488,binding; GO:0017076,purine nucleotide bin…	PF00069.28:Protein kinase domain	--	--	--
DJ07826	3.5989	2.0634	4.3009	403.527	453.333	405.321	40	30	46	4387	5055	4051	7.16867	4.68442e-132	2.08406e-129	up	GWHBFHJ00000007	29475138	29476492	-	DJ07826	--	--	--	CASP 1 [Olea europaea subsp. europaea]	CSPLD_POPTR RecName: Full=CASP-like protein 1D1; Short=PtCASPL1D1;	A0A5B7C421_DAVIN RecName: Full=CASP-like protein {ECO:0000256|RuleBase:RU361233};	--	GO:0016021,integral component of membrane; GO:0005886,plasma membrane; GO:0051539,4 iron, 4 sulfur cluster binding; GO:0003674,molecular_function; GO:0005488,binding; GO:0051536,iron-sulfur cluster binding; GO:0051540,metal cluster binding; GO:0005575,cellular_component; GO:0016020,membrane; GO:0031224,intrinsic component of membrane; GO:0110165,cellular anatomical entity; GO:0071944,cell periphe…	PF04535.15:Casparian strip membrane protein domain	--	--	--
DJ24722	0.5021	0.4387	0.4845	69.8088	54.0131	60.8996	14	16	13	1904	1511	1527	7.16281	5.94491e-131	2.58857e-128	up	GWHBFHJ00000002	12777866	12782224	-	DJ24722	--	K22324 aliphatic glucosinolate S-oxygenase [EC:1.14.13.237] | (RefSeq) FMO_GS-OX5; flavin-monooxygenase glucosinolate S-oxygenase 5 (A)	--	Flavin-containing monooxygenase FMO GS-OX5 [Olea europaea subsp. europaea]	GSXL3_ARATH RecName: Full=Flavin-containing monooxygenase FMO GS-OX-like 3; EC=1.8.-.-; AltName: Full=Flavin-monooxygenase glucosinolate S-oxygenase-like 3;	A0A4S4D1K4_CAMSI RecName: Full=Flavin-containing monooxygenase {ECO:0000256|RuleBase:RU361177}; EC=1.-.-.- {ECO:0000256|RuleBase:RU361177};	Flavin-containing monooxygenase	GO:0050660,flavin adenine dinucleotide binding; GO:0004499,N,N-dimethylaniline monooxygenase activity; GO:0050661,NADP binding; GO:0000166,nucleotide binding; GO:0003674,molecular_function; GO:0005488,binding; GO:0036094,small molecule binding; GO:0043167,ion binding; GO:0043168,anion binding; GO:0097159,organic cyclic compound binding; GO:1901265,nucleoside phosphate binding; GO:1901363,heterocy…	PF00743.22:Flavin-binding monooxygenase-like	--	--	--
DJ21493	0.2506	0.4047	0.2478	37.9074	41.1882	42.5958	62	131	59	9175	10225	9478	7.20225	1.07847e-128	4.5981e-126	up	GWHBFHJ00000012	34969251	34983315	-	DJ21493	--	K01183 chitinase [EC:3.2.1.14] | (RefSeq) endochitinase EP3-like (A)	ko00520: Amino sugar and nucleotide sugar metabolism; ko01100: Metabolic pathways	endochitinase EP3-like [Olea europaea var. sylvestris]	CHI4_BRANA RecName: Full=Basic endochitinase CHB4; EC=3.2.1.14; Flags: Precursor;	A0A5B6Z0Q2_DAVIN SubName: Full=Putative endochitinase PR4 {ECO:0000313|EMBL:MPA37398.1}; EC=3.2.1.14 {ECO:0000313|EMBL:MPA37398.1}; Flags: Fragment;	Predicted chitinase	GO:0005615,extracellular space; GO:0008061,chitin binding; GO:0004568,chitinase activity; GO:0016998,cell wall macromolecule catabolic process; GO:0006032,chitin catabolic process; GO:0006952,defense response; GO:0000272,polysaccharide catabolic process; GO:0003674,molecular_function; GO:0005488,binding; GO:0097367,carbohydrate derivative binding; GO:0003824,catalytic activity; GO:0004553,hydrola…	PF00182.22:Chitinase class I	--	--	--
DJ11291	0.2135	0.3509	0.2219	30.5937	30.5942	34.537	20	43	20	2803	2875	2909	7.04264	3.43458e-128	1.43446e-125	up	GWHBFHJ00000008	35932698	35940937	+	DJ11291	--	K15102 solute carrier family 25 (mitochondrial phosphate transporter), member 3 | (RefSeq) mitochondrial phosphate carrier protein 3, mitochondrial-like (A)	--	mitochondrial phosphate carrier protein 3, mitochondrial-like [Olea europaea var. sylvestris]	MPCP3_ARATH RecName: Full=Mitochondrial phosphate carrier protein 3, mitochondrial; AltName: Full=Mitochondrial phosphate transporter 3; Short=MPT3; AltName: Full=Phosphate transporter 3;1; Flags: Precursor;	A0A5A7QNQ2_STRAF SubName: Full=Mitochondrial phosphate carrier protein {ECO:0000313|EMBL:GER45521.1};	Mitochondrial phosphate carrier protein	GO:0031305,integral component of mitochondrial inner membrane; GO:0005739,mitochondrion; GO:0009505,plant-type cell wall; GO:0000325,plant-type vacuole; GO:0005315,inorganic phosphate transmembrane transporter activity; GO:0003729,mRNA binding; GO:1990547,mitochondrial phosphate ion transmembrane transport; GO:0035435,phosphate ion transmembrane transport; GO:0009651,response to salt stress; GO:0…	PF00153.30:Mitochondrial carrier protein	--	--	--
DJ08161	702.536	397.48	729.078	3.7009	2.2719	3.6902	20959	15512	20931	108	68	99	-7.41823	1.16444e-127	4.76603e-125	down	GWHBFHJ00000007	33941309	33943175	+	DJ08161	--	K20618 nepetalactol monooxygenase [EC:1.14.14.161] | (RefSeq) cytochrome P450 76A1-like (A)	ko00902: Monoterpenoid biosynthesis; ko01100: Metabolic pathways; ko01110: Biosynthesis of secondary metabolites	cytochrome P450 76A1-like [Olea europaea var. sylvestris]	IO_CATRO RecName: Full=Iridoid oxidase {ECO:0000303|PubMed:24710322}; Short=CrIO {ECO:0000303|PubMed:24710322}; EC=1.14.14.161 {ECO:0000269|PubMed:24710322}; AltName: Full=Cytochrome P450 76A26 {ECO:0000303|PubMed:24710322}; Short=CrCYP76A26 {ECO:0000303|PubMed:24710322};	A0A384XD78_OLEEU SubName: Full=Iridoid oxidase {ECO:0000313|EMBL:ATN39842.1};	Cytochrome P450 CYP2 subfamily	GO:0005783,endoplasmic reticulum; GO:0005789,endoplasmic reticulum membrane; GO:0016021,integral component of membrane; GO:0020037,heme binding; GO:0005506,iron ion binding; GO:0004497,monooxygenase activity; GO:0016705,oxidoreductase activity, acting on paired donors, with incorporation or reduction of molecular oxygen; GO:0035834,indole alkaloid metabolic process; GO:0009753,response to jasmoni…	PF00067.25:Cytochrome P450	--	--	--
