# Supplementary material for: Genome-wide identification and expression analysis of the LBD gene family in Jasminum sambac
Source: Research Square preprint supplement (doi:10.21203/rs.3.rs-7770306/v1), 2025-10-30
Supplement: Supplementary file 3 [file 189f8db303f7d70f09d60b30.xlsx]

## Sheet: Sheet1
ID	DJ1-1 (0 h)	DJ1-2 (0 h)	DJ1-3 (0 h)	DJ2-1 (48 h)	DJ2-2 (48 h)	DJ2-3 (48 h)	DJ3-1 (96 h)	DJ3-2 (96 h)	DJ3-3 (96 h)
DJ00001	1.6564	6.2565	9.1124	6.3593	9.9361	10.3206	7.869	7.5749	9.2097
DJ00002	91.4188	58.3037	65.3214	46.8314	39.435	41.9293	45.0705	45.6307	49.2351
DJ00003	46.1666	91.4153	35.1036	33.6845	22.1587	33.4486	32.2324	20.3144	25.9201
DJ00004	61.0129	51.852	65.3607	74.1468	59.8684	69.355	65.2645	62.4157	67.4793
DJ00005	77.2539	74.2256	97.954	46.9482	45.4862	54.3799	46.1628	47.8726	46.9729
DJ00006	3.1661	4.8406	2.0937	1.3568	2.3696	1.9883	1.8636	1.0519	0.4268
DJ00007	0.2635	2.291	0.616	0.2149	0.2624	0.3413	0.2357	0.197	0.6226
DJ00008	0.7429	0.3904	0.386	0.4041	0.2959	0.4811	0.5221	0.324	0.4131
DJ00009	0.1679	0	0	0.3653	0.0669	0.1933	0	0.1673	0.0934
DJ00010	15.7465	13.8243	15.9068	15.7528	17.2641	16.6327	14.1398	12.875	14.6184
DJ00011	5.1679	4.5685	6.1503	5.1506	4.4163	4.9861	4.3683	4.0863	5.2332
DJ00012	2.817	3.1043	3.1935	3.9001	3.0896	3.4119	2.5059	2.6255	2.5631
DJ00013	49.5569	44.1113	52.1329	36.9236	28.936	33.5314	37.7546	36.8096	37.0668
DJ00014	413.39	216.333	358.732	1.7885	1.269	1.3606	4.5172	4.4041	3.7138
DJ00015	5.1099	4.2969	5.2039	5.5586	5.5368	8.2367	6.7912	4.3802	4.8869
DJ00016	6.2754	4.1287	5.9305	6.8265	8.1529	6.5204	7.8909	8.478	7.8053
DJ00019	22.0126	92.1439	26.4018	123.525	17.4992	43.7111	61.4649	6.0893	36.2332
DJ00020	1.2146	2.3385	2.8984	3.6703	4.8028	4.7135	5.5189	5.2911	5.0528
DJ00021	6.7159	4.0751	5.8012	41.7789	33.0068	33.5878	29.6947	36.5658	26.5593
DJ00022	1.3546	1.0355	2.4012	29.47	40.5017	33.3019	37.2267	39.4718	31.1899
DJ00023	16.8284	12.8279	21.4123	12.2214	7.7321	10.5685	7.2824	7.1478	8.4
DJ00024	4.5075	16.3277	9.5123	6.7892	8.6189	9.6211	8.401	7.4996	8.2515
DJ00025	537.501	290.494	381.742	195.558	148.821	165.03	155.506	119.759	135.632
DJ00026	0	0	0.059	0.0618	0	0	0	0.0566	0.0632
DJ00028	148.839	134.394	213.108	164.996	131.091	160.237	162.681	139.512	144.407
DJ00029	10.2042	33.7709	10.4746	146.92	232.262	226.331	100.334	239.223	127.544
DJ00030	163.129	302.339	144.464	221.798	180.477	195.399	194.784	167.416	195.223
DJ00032	10.624	13.0757	11.2609	14.7928	13.4582	15.9017	15.7487	14.2956	13.2321
DJ00033	15.7778	15.7038	18.0774	14.1804	17.1545	16.6134	16.6815	14.427	13.1467
DJ00034	133.958	65.0534	101.348	100.579	171.631	88.8418	98.3372	115.318	85.1696
DJ00035	20.6638	16.762	21.8014	8.5486	7.8543	13.0067	11.6565	9.6513	11.197
DJ00036	1.9268	9.9016	2.336	0.5822	0.2274	0.6162	0.7661	0.4268	1.5475
DJ00037	4.0295	6.1308	5.8542	2.2555	1.8078	2.7026	2.1597	1.8717	2.8713
DJ00038	10.2151	8.9909	13.3312	11.7328	13.227	11.2104	13.4162	12.8236	11.8714
DJ00039	6.7299	5.0603	5.8088	6.6008	6.7389	6.8171	5.8274	4.362	5.2347
DJ00040	0.0259	0.2179	0.1077	0.1409	0.0619	0.1193	0.106	0.0258	0.0288
DJ00041	13.3579	11.7386	17.8162	34.9325	33.234	39.6856	31.5799	39.7053	33.2239
DJ00042	9.1026	13.9885	9.6148	13.0802	11.9974	13.1328	13.6906	13.9827	13.3716
DJ00043	0.0426	0.2608	0.1329	0.0928	0.0679	0	0	0	0
DJ00047	0.1211	0.0308	0.0419	0.3951	0.4822	0.604	0.4125	0.2413	0.2692
DJ00049	0.358	0.0391	0.0531	0.0556	0.0407	0.0589	0.0523	0.051	0
DJ00056	0.154	0.1177	0.4801	0	0.1227	0.2364	0.105	0	0
DJ00057	9.5524	4.9142	8.6155	2.9409	1.3402	1.3834	1.7197	1.4971	2.4051
DJ00058	4.2026	6.6899	6.1141	3.2808	3.3089	3.1309	2.3757	2.7597	2.6941
DJ00059	1.3732	4.7917	1.6284	0.123	0.0386	0.1488	0.0495	0.0644	0.0719
DJ00062	0.4848	0.2647	0.3599	0.0753	0.0552	0.0797	0.0708	0.069	0.0385
DJ00063	0.498	0.8883	0.5463	0.9029	1.0801	0.9557	0.5657	0.4688	0.6153
DJ00064	6.3494	9.0016	8.5575	14.8185	9.3509	15.1083	12.9233	5.3506	7.7669
DJ00066	0	0.0573	0	0.326	0.3581	0.6038	0.0766	0.0747	0.0833
DJ00068	118.479	59.4551	91.5008	3.274	7.4568	3.1694	3.0769	6.0729	3.0204
DJ00069	17.8582	20.4167	21.3722	23.507	25.3056	24.8304	26.6228	21.9432	24.6266
DJ00070	35.5311	31.0484	57.6109	12.7142	10.6156	12.4702	13.2034	12.7565	13.9939
DJ00071	1.3081	5.9822	1.1652	0.6861	0.1861	0.7262	0.9075	0.6519	2.3119
DJ00072	9.3989	5.4909	7.9782	8.8897	7.2676	9.2041	9.4065	7.6524	8.4056
DJ00073	5.3403	5.4185	5.4688	3.9503	3.574	3.2868	3.0971	2.6324	3.1313
DJ00074	52.8694	90.7363	136.807	7.6472	10.5073	9.298	9.9784	8.8021	9.562
DJ00075	19.0679	23.8662	19.5068	78.2403	87.2146	66.09	45.4515	49.3361	58.7789
DJ00076	69.4956	123.375	61.2757	140.575	91.3145	116.973	118.151	86.1251	118.727
DJ00077	6.1958	10.8659	8.3052	19.4268	19.206	17.9541	18.9227	18.8642	17.891
DJ00079	64.3421	41.2479	59.7897	31.0651	24.3175	25.4478	27.5453	25.9466	25.9832
DJ00080	24.1771	15.7099	21.8999	13.8076	11.75	10.4388	12.9352	11.2459	13.219
DJ00081	12.8875	13.5865	14.6328	12.913	8.8235	14.5329	10.8702	11.4133	10.7671
DJ00082	0.0457	0.0815	0.0791	0.0331	0.0485	0.0351	0	0.0607	0.0339
DJ00083	4.5288	5.2031	3.3732	7.347	7.6334	7.5652	7.8681	7.4103	7.7435
DJ00084	17.6109	27.5957	30.4506	29.7296	29.4591	30.0363	29.9571	22.215	27.4665
DJ00085	355.91	382.683	440.16	84.2013	83.2461	73.0446	151.272	97.5141	149.645
DJ00087	52.9944	32.9236	53.4656	36.1723	34.6207	40.508	43.0715	41.5537	43.0492
DJ00088	0	0	0.0804	0.2525	0.1233	0.4455	0.2373	0.1543	0.8606
DJ00089	1.7771	3.0899	2.1726	15.6924	8.1063	6.9005	13.0022	24.8674	17.6307
DJ00090	78.5004	155.294	118.416	163.212	132.483	155.578	118.51	89.4622	118.507
DJ00092	0	0.1331	0	0	0	0	0	0	0
DJ00093	2.1671	5.1253	2.2168	18.7122	34.7208	11.5402	39.1179	28.1147	26.9237
DJ00094	25.2857	180.3	152.492	168.925	179.226	184.819	158.757	116.196	145.927
DJ00095	35.739	68.0188	72.0781	86.3897	93.7417	132.911	71.0903	142.103	67.7953
DJ00096	0	0	0	0	0	0	0	0	0.063
DJ00098	11.0455	9.2654	13.9817	10.1606	7.3531	9.1326	8.2228	9.273	8.3673
DJ00099	5.4269	84.458	8.9814	6.1221	7.313	5.7084	4.1097	3.339	2.9057
DJ00100	8.059	13.8394	6.19	2.5411	4.6527	4.0343	3.224	3.9582	4.1563
DJ00101	0.0723	0.1106	0	0.0787	0.1152	0.0833	0	0	0
DJ00102	58.9711	75.1705	55.0052	54.6429	38.9452	49.1643	44.1627	40.437	44.7198
DJ00103	705.125	1329.55	450.518	699.931	436.966	454.619	469.91	514.545	602.546
DJ00105	0.427	0.399	0.8875	0.1548	0.1134	0.0546	0.4365	0.1419	0.0528
DJ00106	4.0395	2.7508	10.9526	12.8542	18.792	11.0393	24.6831	18.9514	24.8871
DJ00107	48.9353	26.4101	44.8989	5.7086	8.9194	6.596	8.8968	8.8485	10.018
DJ00108	0.9535	1.2634	0.6275	0.4494	0.3798	0.8416	0.4874	0.2217	0.4948
DJ00109	42.9993	29.9655	79.3386	19.3748	20.6915	21.9654	27.808	31.4201	28.5494
DJ00112	155.518	321.473	144.577	229.401	193.979	194.638	188.606	179.801	214.589
DJ00113	0.4549	0.1159	0.2101	0	0.0403	0.1164	0.155	0.1008	0.1686
DJ00114	112.46	85.8303	85.0206	91.1932	100.404	80.1461	88.4019	94.2272	89.1893
DJ00116	0.2099	0.1604	0.2617	0	0	0.145	0.2575	0.0837	0.0467
DJ00117	0.8193	0.3132	0.5169	0	0	0	0.0299	0.0875	0.0325
DJ00118	4.0066	5.8603	5.1628	7.3222	7.0866	8.1191	9.2299	7.428	8.6438
DJ00119	67.8896	60.4071	56.2523	18.1995	15.9182	14.0094	27.0695	28.3903	23.1409
DJ00120	3.345	0.8293	2.4426	6.1957	2.449	4.6841	7.0243	4.9561	7.8418
DJ00121	0.3318	1.1733	1.2932	2.211	2.4125	2.77	2.29	2.1499	2.0758
DJ00122	23.387	20.8983	33.5536	28.0191	26.7742	29.6562	19.2243	17.2206	21.8486
DJ00123	27.8297	23.615	26.1892	41.1102	28.9988	37.6982	30.203	28.5816	30.8716
DJ00124	75.5955	111.061	71.4915	1348.58	1987.01	1281.16	1366.19	1306.43	1163.06
DJ00125	26.6707	71.8694	37.589	44.6847	49.7834	36.6849	26.1464	37.8344	32.7309
DJ00126	1.0644	0.8438	0.6555	19.0405	29.3355	22.2409	29.9851	29.7454	27.3996
DJ00127	19.2469	16.4327	16.2842	32.9296	32.0493	31.4998	28.9119	23.043	26.7338
DJ00128	11.3775	9.7847	18.2889	0.838	0.661	1.0916	1.3934	0.4725	1.4497
DJ00130	1.7196	3.2227	2.3057	3.0774	3.2483	4.8219	4.1681	3.7873	3.3619
DJ00131	1.4558	0.5565	1.7398	0.4751	1.5658	1.76	1.6372	0.8706	1.538
DJ00132	20.2707	17.4476	20.1377	12.8489	8.4548	10.8726	11.2264	9.1672	11.4933
DJ00133	30.7182	36.5162	28.659	16.8129	16.97	17.5728	14.2701	15.5016	15.2539
DJ00136	6.7131	12.0043	6.6701	2.0925	1.2355	1.7402	2.388	0.9782	2.2483
DJ00137	44.2366	34.8879	41.7746	45.617	36.3338	42.2518	43.2803	40.1686	42.5895
DJ00138	0.0406	0	0	0	0	0	0	0	0
DJ00139	50.6266	56.1348	50.0473	58.6847	49.8056	57.9945	54.6567	44.2391	53.4461
DJ00142	23.8038	12.08	22.7723	3.5429	2.6589	3.611	3.5352	3.1261	3.13
DJ00144	6.5981	9.2366	6.428	14.3549	11.5321	14.4814	12.9005	10.6869	12.4735
DJ00145	6.3816	4.0421	6.3284	13.8046	13.7713	21.119	17.3354	17.9193	15.4098
DJ00147	23.2696	17.6497	22.4835	15.9933	11.5111	13.8348	12.4327	12.9899	14.0486
DJ00148	9.435	8.1893	6.5874	4.7041	0.6656	1.8671	2.5621	1.4204	1.7487
DJ00149	0.2777	0.3892	0.1924	0.3524	0.1106	0.1066	0.3785	0.3229	0.2059
DJ00151	6.0291	6.7959	15.5771	1.9033	1.6388	2.2595	3.239	2.4509	3.3392
DJ00152	0.8965	1.4685	0.3327	0	0.051	0.0737	0	0	0
DJ00153	5.6317	5.8874	7.603	6.8593	7.8233	9.1443	7.775	8.348	7.3333
DJ00154	7.8394	8.3142	7.1826	9.0668	7.9566	8.1776	8.9627	7.5859	9.0852
DJ00155	24.615	19.2563	22.0956	28.8602	24.266	24.3158	25.4094	23.0073	23.7516
DJ00156	17.2095	13.6573	18.8059	20.6096	24.4095	23.8574	21.4991	22.5379	23.6862
DJ00157	12.1806	24.7837	7.4569	4.6836	3.8407	6.6944	4.9283	3.998	5.811
DJ00159	0.7392	1.2362	0.4801	6.6845	5.043	4.4685	4.7234	4.1447	4.6241
DJ00160	17.0413	19.2262	23.6759	18.5153	18.4143	20.6161	19.9467	18.9756	20.4384
DJ00161	661.895	619.511	385.286	4.9526	4.3528	12.4854	11.2976	4.1254	12.2431
DJ00163	1.0635	2.6607	1.2056	2.3663	2.0027	2.115	1.878	0.7227	2.0428
DJ00164	24.7903	16.7412	42.0101	5.1933	2.4776	7.0601	7.03	4.8895	8.134
DJ00165	3.2144	3.4919	4.7787	4.1491	4.3009	4.8165	4.7327	3.6638	4.4297
DJ00166	29.4485	39.3281	29.4959	78.1561	79.7146	83.7438	73.9955	65.2473	67.4688
DJ00168	0.2793	1.2809	1.1971	3.2278	3.3097	3.2959	4.1399	3.5839	4.2315
DJ00169	0.3134	1.126	0.3583	3.307	3.296	3.6446	1.6981	5.0606	3.067
DJ00170	1.9077	1.875	1.9352	6.6209	8.2509	12.6558	6.4081	7.3343	5.8592
DJ00171	6.5674	6.5013	8.3467	26.469	31.2811	47.436	20.9149	40.406	25.6926
DJ00172	0.4637	0.4135	0.1606	2.9423	4.2483	2.7583	1.1061	2.6189	1.8047
DJ00173	0.1409	0.3769	0.0366	2.1069	5.527	5.7168	1.728	1.6146	1.9188
DJ00174	1.2274	1.3512	1.3776	1.629	1.2322	2.6569	1.1294	0.8564	1.3923
DJ00175	0.2086	0.1367	0.418	0.3727	0.5697	1.1663	0.1828	0.1336	0.2816
DJ00176	0.1616	0.2059	0.3919	0.8792	0.8586	0.9926	0.2203	0.2148	0.1198
DJ00177	0.7312	1.2039	1.5781	2.0191	1.0755	2.3313	1.15	0.3364	0.9382
DJ00178	0.1164	0.5786	0.968	0.8233	0.2783	2.212	0.4166	0.7544	0.7769
DJ00180	0.8232	0.9649	1.2831	6.2083	7.2359	15.3852	2.721	3.7742	4.5464
DJ00181	0	0.0765	0	0	0.2391	0.1152	0.2045	0.0997	0.3337
DJ00183	6.0329	4.8562	5.4388	3.39	4.3609	4.232	3.676	5.4159	3.5988
DJ00184	8.2971	14.9014	23.0426	11.5482	13.7983	15.7688	14.446	11.2675	13.6186
DJ00185	6.591	4.8727	5.9254	3.4905	3.2647	2.8957	3.1696	2.7877	3.2307
DJ00186	2.7856	2.4971	2.9572	2.1582	2.2034	3.0457	2.7249	1.8776	2.496
DJ00187	2.299	2.4785	1.7765	4.4246	1.6438	2.7827	3.0132	3.6429	4.7198
DJ00188	38.9176	26.5031	37.5129	17.8932	19.8421	21.5581	22.4352	24.6229	23.1727
DJ00189	0.2254	0.1723	0.937	0.0613	0	0	0.0576	0	0
DJ00191	2.3279	5.2629	1.647	67.0781	83.9324	168.055	46.2801	137.537	72.9787
DJ00194	0	0	0	2.3633	1.8727	1.3122	2.403	3.4078	2.2179
DJ00198	11.2292	10.7302	10.4882	9.1614	7.6684	12.0054	8.7466	7.062	6.6897
DJ00199	6.5816	8.4737	7.1479	9.6357	6.7024	7.2359	12.7993	9.4702	7.7042
DJ00203	107.74	245.692	274.179	278.01	295.926	352.999	481.41	449.835	404.353
DJ00204	26.5092	35.2291	22.0681	60.5813	130.693	82.9163	103.383	114.475	84.8237
DJ00206	15.0181	20.3971	11.2493	61.2012	78.2901	58.2378	48.0868	115.612	47.0506
DJ00207	0.998	1.2642	1.0371	0.946	0.7837	0.8864	0.4227	0.8242	0.4439
DJ00209	0.1123	0.0215	0	0.0611	0.0447	0.0323	0.0574	0.0839	0
DJ00211	0.1403	0.0644	0.1167	0.9159	0.7603	0.6786	0.4878	0.6994	0.437
DJ00212	35.8192	22.5747	33.5535	21.5625	19.4842	24.5583	20.7908	17.8145	20.9387
DJ00214	0.3485	0.9151	0.7716	0.511	0.1207	0.3489	0.7591	0.3474	0.4887
DJ00215	2.3549	1.7206	2.2739	2.2896	1.1456	1.9435	1.3209	1.3086	2.0162
DJ00217	0.5368	1.0002	1.0459	1.4781	1.4434	2.6653	1.8521	3.0932	2.4624
DJ00218	9.8094	25.4297	15.1212	31.4218	21.1966	35.1331	26.3849	35.556	24.7555
DJ00219	239.471	232.066	219.809	116.462	91.6705	114.235	145.404	121.572	141.354
DJ00220	0.0389	0	0	0	0.031	0	0	0.0388	0.0433
DJ00221	9.7681	31.5717	8.9274	24.9206	12.4468	19.5261	22.5097	6.7234	13.4102
DJ00222	11.4121	27.566	19.5003	24.1885	19.3561	26.8886	23.0331	18.8799	22.4378
DJ00223	65.4567	57.0415	64.5626	48.4633	58.2638	58.3716	53.7907	46.6692	49.1077
DJ00224	309.351	243.476	266.679	215.286	208.317	234.413	279.25	265.672	267.774
DJ00226	3.8161	2.4649	3.0434	2.7996	3.3232	3.3038	2.8428	2.3589	3.2239
DJ00227	24.194	29.3577	33.3097	28.8861	26.1774	29.4868	32.6009	28.844	31.9446
DJ00228	9.3282	8.4892	9.2833	11.06	8.6116	9.2627	9.3851	7.9203	6.7509
DJ00229	2.6085	2.9802	3.2767	4.9892	5.7095	7.2279	4.4251	3.8858	5.1003
DJ00232	68.5585	33.7736	58.0743	141.211	199.765	203.572	141.438	138.424	133.396
DJ00233	20.0823	18.3824	19.1487	11.8943	15.9305	14.9466	16.7007	19.7563	17.4396
DJ00234	31.4447	26.0182	26.0215	32.4838	25.5111	27.9196	28.7629	22.8073	28.9665
DJ00235	0	0	0	0.0668	0.0979	0.0708	0.1885	0	0
DJ00236	0	0.0307	0.0418	0.3497	0.4482	0.2313	5.1758	5.1263	1.8767
DJ00238	26.972	19.1305	22.3044	17.4596	19.3326	15.3633	16.6514	14.436	14.5746
DJ00240	38.7292	46.0921	59.0804	41.7818	48.1012	41.3209	41.5572	37.9249	39.3312
DJ00242	2.231	0.6497	1.9872	0.7223	0.6348	0.9786	0.6788	0.6618	0.7679
DJ00243	7.0867	5.3785	7.4173	3.91	5.0571	5.7527	3.5704	3.5826	4.1672
DJ00245	40.6671	31.2337	36.8497	15.7821	14.5687	14.5842	15.4811	13.9545	15.0393
DJ00246	17.4861	40.8178	29.3476	3.5854	1.8244	4.1944	2.3055	1.6253	2.5078
DJ00247	162.481	99.5726	154.497	33.4888	34.5067	35.7405	52.1054	37.9971	45.8127
DJ00248	0	0	0	0	0	0	0	0	0.101
DJ00249	8.353	6.4318	8.6173	4.0824	3.0864	4.5996	3.5272	5.3092	3.8367
DJ00250	311.266	536.877	255.585	384.793	298.356	413.673	247.965	559.242	283.722
DJ00252	538.097	333.405	390.234	17.3086	9.332	24.9817	13.778	13.8551	20.5975
DJ00253	0.7405	0.8234	1.9588	1.4646	2.7353	3.2554	2.0647	2.684	1.8715
DJ00254	13.8515	29.047	16.2914	11.6091	14.2461	13.5559	16.2527	13.4925	15.1234
DJ00255	32.9568	16.6781	31.4083	6.4019	5.2916	7.502	7.7356	6.7878	7.6197
DJ00256	3.2942	3.0691	2.193	9.2386	8.3247	8.5339	6.3672	7.6443	7.6128
DJ00257	17.423	12.721	22.0386	9.0394	7.9177	10.0545	10.0301	8.3037	9.2643
DJ00258	4.5037	4.9277	5.0128	4.6902	5.5438	4.5464	3.9932	3.872	4.2962
DJ00259	128.493	238.248	147.421	228.427	217.856	240.589	193.403	159.067	182.219
DJ00260	17.4007	20.7133	25.8478	20.3712	21.8445	23.0883	22.4976	19.8803	22.1204
DJ00261	8.2634	19.6311	9.2806	16.9408	18.7631	17.1987	13.5491	18.4686	18.5198
DJ00262	4.5235	3.5485	3.3471	1.3139	0.5849	0.9817	0.8474	0.5665	1.1325
DJ00263	0.3879	0.4872	0.9214	0.5425	0.0883	0.4147	0.2833	0.1933	0.5546
DJ00264	6.8521	8.1647	10.4246	4.6304	4.7355	7.0825	6.156	4.3074	6.8261
DJ00266	0	0.0555	0	12.7947	10.4699	11.4106	10.6513	8.1413	11.4246
DJ00267	2.6171	1.7043	1.7124	1.4762	1.4673	1.2276	0.6937	0.8695	0.7545
DJ00268	268.8	212.938	212.386	1188.4	1168.63	1346.69	1096.69	1456.95	1136.62
DJ00269	0.4796	0.5041	0.9345	0.4565	0.8597	1.7256	0.7355	0.6573	0.8
DJ00270	0	0	0	0.1364	0.0999	0	0	0	0
DJ00271	46.0794	53.0713	56.933	38.7736	29.5587	39.4006	47.4546	36.0341	43.556
DJ00272	0.4234	10.2756	1.6498	0	0	0.1219	0.2164	0	0
DJ00273	3.1162	9.6108	12.8412	72.7053	127.902	124.338	105.349	96.6074	83.1676
DJ00274	3.3325	2.2811	3.3499	2.6774	2.8113	3.0595	2.7834	2.019	2.3011
DJ00277	34.1018	20.4916	27.471	2.128	1.3901	2.435	1.6215	1.2648	2.3518
DJ00278	0.0664	0	0	0	0	0	0	0	0
DJ00279	0	0	0	0	0	0	0	0	0.5209
DJ00280	12.8634	12.3957	14.7793	19.4867	14.651	18.1742	15.327	13.747	15.6143
DJ00281	1.2517	1.2461	1.3612	0.6966	0.7421	0.9049	0.6249	0.3192	0.7122
DJ00282	273.853	280.293	336.742	231.569	185.599	238.663	269.996	249.99	268.127
DJ00284	60.1599	29.0163	68.7074	20.4111	23.6104	22.9473	22.6045	19.7736	21.344
DJ00286	9.2245	7.5816	12.0792	11.4266	15.0385	15.4707	14.609	15.0406	12.9856
DJ00287	163.992	133.236	134.804	41.7763	60.5607	34.5132	66.6551	60.5486	61.1868
DJ00288	0.0441	0.09	0.0765	0.032	0	0.0169	0	0.044	0.0164
DJ00289	0.1081	0.0826	0.5615	0.3527	0.2583	0.2489	0.221	0.1077	0
DJ00290	7.7844	14.7927	6.4846	2.057	1.0295	2.032	2.7709	1.1937	2.1729
DJ00291	60.1275	33.5349	50.5179	72.8593	63.6207	74.5505	70.4563	135.082	57.1354
DJ00292	88.645	155.56	94.3834	13.0828	9.2242	10.7823	20.7544	19.1161	19.9722
DJ00293	3.4033	8.1136	5.3348	2.353	1.3557	1.1622	2.3293	1.5523	1.6678
DJ00295	0	0	0	0	0.0543	0	0	0	0
DJ00296	5.8506	5.6804	5.1478	6.8289	7.2811	7.1787	8.3388	7.8747	6.8385
DJ00297	0.3593	0.2747	0	0.1954	0.1431	0.4137	0.3673	0.3581	0
DJ00299	23.8176	28.7825	25.2121	33.2721	36.7383	37.9194	35.4212	31.3299	34.131
DJ00300	43.4088	40.824	55.1611	36.4578	32.298	31.5404	37.5459	33.4656	36.2657
DJ00301	13.9223	11.9201	12.6158	6.3608	4.0819	4.2319	5.7502	4.7737	4.9543
DJ00302	5.8764	16.5651	5.3432	6.2725	2.1068	2.4949	2.0651	1.6107	1.7562
DJ00303	211.496	129.079	179.547	188.421	206.948	202.66	194.199	180.949	189.738
DJ00304	0.1095	0.0558	0.0759	1.3505	2.0945	1.3033	0.8959	0.8371	0.7309
DJ00307	0	0.0701	0	0	0.0731	0.2112	0.0938	0.2743	0
DJ00308	7.8534	2.7016	6.2568	0.1424	0	0	0	0	0
DJ00310	59.326	41.6956	73.2788	11.3396	7.9632	10.0253	14.763	9.2901	10.8762
DJ00311	0.2135	0.7344	0.721	0	0	0	0.0546	0	0
DJ00312	10.7552	15.3669	14.8487	20.9478	26.3389	28.1864	27.6191	37.9287	23.3794
DJ00313	23.0459	18.2642	22.2254	46.8628	44.2175	52.1724	37.9527	51.5071	40.4931
DJ00314	439.936	158.986	464.146	45.2912	40.1337	60.0578	61.5017	57.4401	73.9528
DJ00315	94.6455	61.2513	85.454	29.2554	24.7549	33.713	23.5491	26.5682	30.2168
DJ00316	0.5531	0.1409	0.1916	0.6016	0	0	0.1885	0.1838	0.205
DJ00317	10.7774	9.6323	8.5409	10.6453	8.3317	11.1568	5.7542	10.8697	6.1881
DJ00318	28.6913	13.56	22.7643	8.9098	8.6879	7.8122	7.2834	17.4871	8.7849
DJ00319	2.3527	11.7505	2.0102	0.9669	1.0414	0.3612	0.3207	0.1042	1.4535
DJ00320	0.1725	0.1758	0.1494	0	0.0229	0.1986	0.0588	0.0287	0
DJ00321	6.8271	6.1651	6.2233	5.1682	2.163	3.1718	3.9591	3.0642	4.9282
DJ00322	9.6702	7.02	12.5295	7.1012	6.6564	7.8807	6.4745	5.7298	6.5009
DJ00323	12.0618	22.7081	9.6148	0.1222	0.0597	0.1294	0.2681	0.0747	0.0833
DJ00325	0.2383	0.1063	0.2683	0.216	0.3322	0.2286	0.3451	0.1188	0.1546
DJ00327	1.6245	2.2861	2.417	2.3294	2.3237	2.4655	1.9249	1.656	1.3549
DJ00328	0	0	0	0.0863	0.1264	0	0.2433	0	0.0882
DJ00329	15.263	10.3714	11.9216	12.2626	10.7098	9.6481	9.5357	8.5264	10.0397
DJ00330	5.4977	3.0416	6.2792	6.2678	7.3396	7.7935	6.7344	5.9405	6.1137
DJ00331	42.8165	44.1081	40.607	61.1975	76.4507	61.0948	51.3002	45.5893	46.4441
DJ00332	49.3248	75.5784	40.6167	5.2478	3.7964	6.7333	6.3209	5.2402	7.2697
DJ00333	4.6992	8.7118	3.6566	1.1854	0.5426	1.6728	1.1372	0.4526	0.6059
DJ00334	2.2679	0.8668	1.8003	1.9188	1.6563	1.9946	2.6405	1.8523	2.2418
DJ00335	0.328	0.4012	0.2727	0.4281	0.4181	0.2266	0.1341	0.1961	0.2918
DJ00336	18.1459	19.0387	22.8279	25.48	24.3161	25.4722	30.2451	26.0935	31.3671
DJ00337	42.5153	33.2495	28.7535	29.1029	28.9654	30.5851	21.6031	46.0602	22.1993
DJ00338	67.416	35.7848	55.9206	0.1088	0.1594	0.1152	0.6135	0.1994	0.7786
DJ00339	0.9305	1.9916	3.0941	2.9498	3.6219	4.1934	4.104	3.6038	4.1094
DJ00340	5.7847	6.3561	7.87	10.2541	14.2372	11.651	12.7833	10.6323	10.9843
DJ00341	0.1563	0.2787	0.2165	5.3831	7.8852	4.678	11.4494	4.569	6.256
DJ00342	18.0904	14.2841	15.2123	19.9378	21.4613	17.814	19.7921	13.5631	16.9409
DJ00343	2.605	4.359	2.3461	4.597	5.7883	6.3986	7.0723	5.7989	4.796
DJ00344	0	0	0	0.0584	0	0	0	0	0
DJ00345	0.0525	0	0.1092	0.0571	0	0	0.1611	0.0524	0.1168
DJ00346	0	0	0.148	0	0	0	0	0	0
DJ00347	18.993	19.419	20.2756	22.814	20.0508	20.3485	23.2234	17.052	22.1168
DJ00348	15.5931	14.1899	16.0313	2.1005	1.6046	2.2233	0.8915	1.221	1.039
DJ00349	1.6016	0.977	1.8997	2.0767	2.1525	2.0117	2.4809	1.806	2.033
DJ00350	113.677	75.9785	96.8606	107.624	140.392	112.149	145.892	172.87	139.97
DJ00351	15.5709	17.4555	18.352	21.9709	21.5215	21.9372	21.6655	20.5282	18.9198
DJ00352	251.995	346.166	256.09	386.422	346.341	348.43	363.705	311.804	342.625
DJ00353	16.6197	15.2996	15.8112	29.1557	24.6174	25.2668	20.8197	15.1656	17.6358
DJ00354	60.7131	98.7411	71.3128	103.37	89.2743	100.399	80.3553	73.5439	81.4779
DJ00355	200.943	349.6	197.865	78.002	33.8019	96.0868	143.42	57.9488	110.588
DJ00356	25.9319	13.3897	26.081	10.3928	8.5783	10.4762	10.2323	7.4821	8.2634
DJ00357	20.6437	11.268	26.1438	2.5814	1.7831	2.3769	2.5247	2.3269	2.8535
DJ00358	1.9629	1.6506	2.9373	0.3843	0.1877	0.452	0.3211	0.1565	0.2619
DJ00359	4.1028	1.8296	5.3294	0.5951	0.4358	0.6298	0.5593	0.6134	0.2281
DJ00360	190.417	459.869	260.334	722.162	413.19	398.416	447.909	339.741	436.501
DJ00361	0.1959	14.0756	3.2568	8.2036	3.9015	6.3148	23.0291	4.1977	20.2579
DJ00363	18.2921	13.8071	15.2548	23.4934	20.3908	24.0696	21.4506	21.2201	22.2219
DJ00364	0.0613	0	0	70.3622	91.8917	64.5999	92.6775	114.412	73.0196
DJ00365	1.9761	7.3094	5.1005	2.0456	2.5393	3.1559	4.9853	4.384	6.5924
DJ00366	11.7627	15.1211	9.0442	38.9891	25.446	21.6205	32.8134	31.0721	34.5786
DJ00367	0.3142	1.4144	0.2902	17.8861	15.1858	12.8619	19.8429	34.3431	31.0953
DJ00368	0	0	0	0.3335	0.7328	0.2353	0.1045	0.4075	0.3409
DJ00369	24.2694	33.1976	35.8714	57.5474	60.5375	53.5375	66.4625	66.3687	64.0262
DJ00371	104.236	149.561	119.253	87.7702	167.885	110.92	54.5491	47.3511	60.8749
DJ00372	31.7674	47.9822	49.5539	16.7088	34.2097	10.4503	10.4211	9.3948	11.9568
DJ00373	29.8029	18.3116	35.61	18.3834	20.9342	20.537	18.532	16.3771	18.4702
DJ00374	9.5628	2.4192	6.1483	0.0748	0.0548	0	0	0	0
DJ00375	42.3622	47.917	39.082	60.8556	37.4545	47.0304	54.8427	47.6388	50.4197
DJ00376	0.0771	0.707	0.2002	0.0419	0	0.0887	0.1182	0.0384	0.0857
DJ00377	25.8239	64.7773	22.9297	1.252	0.3725	2.671	2.0407	0.5557	1.8798
DJ00378	16.0028	21.9996	15.372	25.1612	21.1067	24.154	27.496	14.8113	22.6561
DJ00379	33.2879	18.3688	26.0964	9.974	13.6744	13.937	10.0662	9.7692	12.0044
DJ00381	73.3684	49.8435	61.5288	43.5508	50.6034	44.2045	51.8648	47.9565	51.0363
DJ00382	0.9402	0.4877	0.9422	0.7306	0.214	0.4639	1.0299	0.502	1.531
DJ00383	9.6151	11.7708	12.4373	12.5806	9.7498	13.2382	9.2112	15.9506	12.9356
DJ00384	56.591	42.7178	37.6665	24.7401	24.5607	24.7536	14.7134	21.5177	22.3274
DJ00386	3.9301	2.4411	4.1691	32.3312	23.2881	34.2203	24.6931	20.4025	26.1316
DJ00389	10.7005	10.2058	12.0375	22.5158	29.2865	30.419	26.5378	41.2015	27.1029
DJ00390	0.141	0.2875	0.0977	0	0.0375	0.1624	0	0.0469	0
DJ00391	4.3929	5.6544	9.091	11.865	14.3437	13.6389	13.3771	12.0505	12.1711
DJ00392	1.4757	1.1591	1.3084	2.3563	2.2543	2.0264	2.4498	1.2819	2.0776
DJ00393	0	0	0	0	0.0471	0	0.1814	0.0589	0.1315
DJ00394	18.8044	13.1517	21.3427	95.1697	71.1902	90.826	89.4408	137.45	109.97
DJ00395	187.629	236.58	141.845	200.202	328.872	272.491	217.038	274.64	279.089
DJ00396	31.0146	81.9576	19.0989	212.841	272.52	236.004	189.786	245.526	246.821
DJ00397	56.5379	27.9886	51.376	41.9951	40.7783	34.8421	38.194	25.8184	30.0515
DJ00399	48.2023	40.5084	53.239	42.3707	38.1824	39.4668	47.647	42.9732	48.4331
DJ00400	35.0345	32.4295	36.3486	37.3194	44.6333	41.0464	38.8491	37.04	35.9726
DJ00402	73.8068	70.1301	52.3049	70.9111	69.8402	65.5728	67.3507	59.1444	61.2792
DJ00403	28.291	28.2056	35.6531	28.022	22.988	27.1985	28.5202	27.9185	28.8965
DJ00404	1.3642	3.8334	1.1495	22.5012	25.8216	19.9527	39.1648	19.0371	30.9981
DJ00405	5.6502	4.3419	4.7034	4.4408	5.3265	5.2793	6.8953	5.278	5.6911
DJ00406	8.5564	15.0668	18.0897	15.3418	18.1944	18.1405	13.5133	14.7043	12.9931
DJ00407	0.7216	0.3894	0.7058	0.9235	0.9131	1.6128	0.7377	0.55	1.0857
DJ00408	32.5432	7.3342	20.6576	9.1007	13.8811	12.0184	3.6879	2.6776	4.1823
DJ00409	1.2253	0.9558	1.1174	0.6256	0.259	0.6046	0.3323	0.324	0.3615
DJ00410	2.3803	2.2563	3.463	2.6411	3.9446	4.2754	2.6281	2.1353	2.0647
DJ00411	244.534	1539.08	1080.11	459.415	688.406	561.586	326.561	522.268	444.785
DJ00413	143.841	110.726	133.222	16.3597	29.0228	20.7786	14.3499	18.6543	15.8322
DJ00414	0.3328	0	0.2306	21.3608	22.8926	17.5634	30.9063	34.5006	32.2615
DJ00415	0	0.2331	0	0	0	0	0	0	0.113
DJ00418	15.4478	17.4346	19.4585	5.5582	2.8721	4.5623	4.7515	3.0735	4.8206
DJ00419	23.3566	15.8163	20.1907	18.1073	15.9469	16.2297	18.4553	15.715	18.641
DJ00420	0	0	0	0.0307	0	0	0	0	0
DJ00421	0.6237	2.2251	0.7922	0.3769	0.2485	0.2394	0.0354	0.1036	0.0771
DJ00423	17.0026	28.2118	15.7792	11.2791	10.884	14.7105	12.8106	9.943	10.82
DJ00424	20.2958	14.9451	17.3174	9.8399	6.4835	7.6151	9.2807	6.5924	8.6169
DJ00425	20.1819	11.1425	17.1775	11.221	11.766	11.0652	12.4778	12.7402	12.0053
DJ00426	9.7314	10.7702	12.1955	13.0508	14.3492	13.6126	13.1561	12.3056	13.2446
DJ00427	14.2671	10.4416	14.2426	12.0597	12.5221	13.8415	10.3295	7.7397	10.5077
DJ00429	6.1151	6.4435	11.1063	8.5698	10.7097	11.2906	9.0114	7.6876	9.0058
DJ00431	15.2516	47.6477	21.5297	4.073	3.2615	6.8976	4.032	2.8612	3.9972
DJ00432	0.1426	0	0.0741	0.0776	0.2273	0.0821	0.0729	0	0
DJ00433	0.5447	1.8142	0.7682	1.9468	3.9366	2.2845	4.2559	2.986	2.6824
DJ00434	8.6242	17.0566	3.8644	37.4399	55.5357	32.9773	39.3923	84.699	40.4737
DJ00435	0.2512	0.6188	0.6962	0.0607	0.0667	0.1286	0.1998	0.1391	0.2794
DJ00436	72.6791	57.3479	86.4365	2.7813	4.941	6.4514	9.677	7.9708	10.1633
DJ00437	2.2936	1.8095	3.1168	3.1027	2.5887	2.8608	2.6304	1.9197	2.2399
DJ00438	6.6455	4.6894	9.3342	6.1963	6.8509	7.273	7.5591	6.9877	7.4916
DJ00439	22.0204	25.9844	16.7097	46.8877	48.0414	84.8548	36.9874	62.9075	56.5253
DJ00440	0	0.1997	0.0543	3.6934	2.7467	3.6085	3.2041	6.8725	5.2859
DJ00441	22.764	26.0797	27.4262	24.8511	28.6178	25.7663	25.987	25.4376	25.7429
DJ00442	4.3197	10.2346	7.9076	9.8025	8.7065	9.0907	11.1134	8.6682	9.9891
DJ00443	0.11	0.2858	0.2285	0.3828	0.5607	0.3039	0.4722	0.1754	0.2446
DJ00446	0.132	0.4203	0.3885	0.6938	0.5607	0.5571	0.4722	0.3069	0.5136
DJ00448	0	0.0434	0.059	0	0	0	0	0	0
DJ00449	0.2113	0.5999	0.2509	0.2134	0.2405	0.2259	0.2469	0.1504	0.3189
DJ00450	0	0.5867	0.1595	0	0	0	0.1569	0.153	0.1707
DJ00451	15.6388	15.9981	16.2513	23.6313	22.6086	23.4405	20.9297	16.438	19.6044
DJ00452	9.2006	16.6016	9.1729	3.6395	1.6422	2.6311	2.7791	1.3399	2.7904
DJ00453	16.0333	12.5504	13.6122	9.9555	9.4065	8.3654	10.499	8.2168	10.5269
DJ00454	0.1195	0.5787	0.207	0.1734	0	0.0917	0.2444	0.1588	0.3987
DJ00455	0.5105	1.2359	0.7958	3.8875	7.457	7.7394	3.3055	4.495	4.3526
DJ00456	48.1038	22.6958	32.9782	2.2712	1.4638	2.6923	1.8356	4.1204	2.0896
DJ00457	13.2819	23.1359	10.8907	7.7132	5.9248	6.2125	7.9915	6.7572	6.1157
DJ00458	61.4597	357.063	62.7079	234.258	28.0168	75.1052	172.964	19.0079	89.4937
DJ00459	80.9568	69.0085	69.88	35.5223	25.5163	30.7289	32.956	28.5841	30.3778
DJ00460	11.8376	10.5574	11.148	14.9561	9.9224	12.6356	9.8328	11.7375	10.2157
DJ00461	4.4002	4.3988	7.4647	4.8685	5.3935	6.7118	7.2668	4.2734	6.0225
DJ00462	106.652	138.473	95.8385	150.883	141.455	149.811	139.448	129.132	152.56
DJ00463	3.184	2.3195	2.4524	2.9746	3.0143	3.3641	3.3317	2.8003	2.3744
DJ00464	196.665	213.408	183.557	263.68	449.709	303.173	409.514	394.21	350.446
DJ00465	29.2861	23.7512	38.7244	1.0211	2.3183	1.0807	2.6869	3.8359	1.9833
DJ00466	6.7881	8.4135	10.8206	7.4558	8.5323	8.802	9.8031	8.5395	9.564
DJ00467	4.53	2.401	2.9186	29.5008	65.3249	25.6611	68.2628	63.5741	53.2636
DJ00468	1.4246	1.443	3.923	2.7507	3.8873	4.5106	3.6774	3.1239	3.4852
DJ00469	3.7694	6.9515	3.3195	0.834	0.509	1.1034	0.7185	0.6156	0.7815
DJ00470	6.7228	8.0441	4.7587	0.6359	0	0.4487	0.3984	0	0.2167
DJ00472	128.798	242.435	149.07	470.268	306.835	395.395	342.093	338.837	350.171
DJ00473	21.9385	14.8853	23.9438	3.5355	1.3872	2.2052	0.9493	1.1281	1.8394
DJ00474	0.0821	0.0837	0.0284	0.1787	0.0872	0.063	0.2518	0.1637	0.1826
DJ00476	0.7633	1.6444	0.3605	0.2264	0.1659	0.3196	0.1419	0.0692	0.0772
DJ00477	1.904	1.8328	2.638	0.8438	0	0.406	1.0093	0.2109	0.4705
DJ00478	31.1318	21.3763	35.5357	27.6152	28.9648	29.9503	36.1346	30.9956	35.7817
DJ00479	2.4177	5.6007	6.7759	2.5503	2.3348	3.6272	2.247	1.9717	2.4442
DJ00481	1.9123	2.071	1.7388	21.7558	20.8857	27.247	18.0839	28.0353	24.2785
DJ00482	27.358	41.5987	37.0933	53.764	56.3608	58.5722	50.8849	43.4907	48.0777
DJ00484	43.7359	26.5213	41.7639	34.525	41.3903	35.8957	46.948	44.3002	42.9839
DJ00486	718.517	388.763	454.302	833.145	983.999	896.058	1451.59	1565.62	1189.75
DJ00488	37.9936	29.3972	39.8176	36.0569	22.3624	34.2834	31.4322	30.5534	32.5478
DJ00489	1.3108	2.7876	0.9164	0.4667	0.2089	0.4665	0.3898	0.3088	0.3445
DJ00491	28.5429	22.2982	36.2388	1.9422	2.6971	2.2425	3.1764	3.0507	3.5325
DJ00492	6.5062	4.4884	10.1415	0.9494	0.4425	1.1876	0.6489	0.7118	0.7059
DJ00493	10.3387	69.0692	17.6336	2.9339	1.343	3.4935	6.3187	2.9123	9.3726
DJ00494	3.5743	4.4771	4.2065	6.3241	5.215	6.049	4.6226	4.8503	5.0283
DJ00495	54.9798	128.843	31.8884	1.433	2.593	4.6395	0.1981	0.0772	0.5601
DJ00496	0.1795	0.0343	0.1399	0.2441	0.3933	0.31	0.1835	0.0447	0.3494
DJ00497	5.4704	10.52	7.6388	67.8756	41.2	32.7715	71.5669	57.5925	61.9737
DJ00498	8.1092	7.4477	10.0353	3.3364	1.7703	3.6297	3.9704	2.1674	4.2977
DJ00499	0.2677	0.2046	1.0431	2.9118	2.186	2.3885	4.7206	4.4023	4.093
DJ00500	23.9372	81.8096	22.4746	3.1216	3.3179	4.5128	2.5402	3.4533	3.0355
DJ00501	45.5316	37.149	41.8396	28.9079	26.8304	26.3107	29.1585	23.0341	27.0362
DJ00502	0.5938	3.6127	0.6428	0.1077	0.0986	0.3134	0.2024	0.1726	0.5503
DJ00504	12.0093	28.4287	26.847	9.2764	7.7991	8.4241	8.2537	7.6448	11.2226
DJ00505	0.3532	0.576	0.5627	0.5635	0.9379	1.2199	1.2276	1.1734	0.9164
DJ00507	10.6322	18.9331	14.2333	8.4703	6.5774	7.849	12.1164	9.4755	10.9889
DJ00509	33.2599	27.7511	33.8953	18.7888	16.5078	18.0186	19.662	19.0351	19.4705
DJ00510	1.4751	1.3064	1.4768	0.861	0.8313	1.077	1.1402	0.5917	0.7802
DJ00511	47.9358	69.3533	79.4709	75.8035	85.117	80.3858	82.4483	61.5382	66.5347
DJ00512	17.5626	23.902	16.8403	9.5524	3.7525	8.6093	8.5149	4.4824	7.5754
DJ00513	25.2263	13.4258	20.1586	4.7473	4.3249	4.4425	3.8358	3.3154	6.2438
DJ00514	5.1545	5.491	5.902	4.9841	4.3348	4.0664	3.7326	2.8305	4.1133
DJ00515	0.2149	0.0821	0.1117	0.2338	0.1712	0	0.1099	0.1071	0
DJ00516	24.2298	22.7699	19.3573	71.3232	83.0214	83.5597	74.9489	105.174	82.9106
DJ00517	0	0.0444	0.0603	0	0	0	0.0593	0	0.1291
DJ00518	5.3256	4.1342	5.4487	6.5697	5.6865	6.2898	6.1462	5.8555	6.2887
DJ00519	3.8464	6.2401	5.4182	5.1604	0.2043	1.1317	3.1895	0.1278	0.7604
DJ00521	0.1168	0.0893	0	1.9058	0.4653	1.0758	1.4329	3.7253	1.4287
DJ00522	36.0114	23.5514	24.2603	9.4583	6.1636	8.4344	7.839	4.1626	7.0043
DJ00523	63.3767	89.3673	75.7066	77.2083	72.7248	77.0948	74.3042	61.1683	72.913
DJ00524	4.4291	4.2769	4.5219	4.9449	6.1599	7.0231	4.4486	4.802	5.0118
DJ00525	4.3793	3.7578	4.0947	4.3182	3.3181	4.0651	4.9656	3.1595	4.4686
DJ00527	32.2861	100.86	21.7403	0.8288	1.3911	2.2662	0.4868	0.2848	0.9179
DJ00529	11.8228	11.8225	17.3112	11.6654	10.3701	13.1243	15.2168	14.0691	14.7538
DJ00530	1.2894	4.0524	1.7866	4.4028	4.4803	12.908	6.7743	11.6743	7.8866
DJ00531	7.7408	7.3649	7.6968	6.4214	8.0307	6.7325	5.4086	4.1076	4.8305
DJ00532	282.016	458.342	256.449	403.908	549.288	482.559	308.099	592.153	330.849
DJ00533	2.901	4.1185	1.3996	17.3563	20.925	11.5113	19.0125	16.8843	14.6322
DJ00534	15.7111	12.367	17.0363	1.9392	1.115	2.2252	1.039	0.9798	0.982
DJ00535	19.1301	14.624	17.2993	32.9859	41.9296	33.2729	42.9842	42.8414	43.5428
DJ00536	9.1559	4.5188	6.6101	0.3495	0.3583	0.2959	0.4927	0.3843	0.2501
DJ00537	0.0458	3.4976	1.1411	0	0	0	0	0	0
DJ00539	4.8819	4.1467	8.8937	0.9834	1.1524	2.3594	2.095	1.5619	2.0777
DJ00540	5.1063	7.2654	8.6576	4.8636	3.932	4.2195	5.0205	3.9451	4.1026
DJ00542	0.8655	1.8682	1.746	1.4954	1.7443	1.7586	1.6656	1.2687	1.7552
DJ00543	0.385	0.7223	0.5819	0.0381	0	0.0806	0.0358	0.0698	0.0389
DJ00544	0.6965	12.2455	4.5492	9.7949	15.7745	21.0208	15.2574	10.512	12.06
DJ00545	1.5199	3.4514	2.1833	0.778	0.463	1.3896	1.7823	0.9802	1.6404
DJ00546	10.0778	13.418	10.1247	10.3559	7.8514	9.9762	8.8962	7.7098	8.7257
DJ00548	5.5992	5.3102	6.9123	7.2816	7.5133	6.4953	5.8534	4.49	6.5543
DJ00549	8.3028	6.0572	7.6825	12.1249	10.1188	7.9008	8.8757	8.6536	9.0644
DJ00550	17.2766	16.249	12.1957	10.8488	11.3568	9.8009	11.1226	9.8401	11.4826
DJ00551	45.8186	113.178	171.008	82.9203	157.638	64.002	88.4787	55.7494	67.0184
DJ00554	0.777	4.8709	0.8882	6.4664	12.2888	4.5628	3.9322	1.3941	2.1603
DJ00556	0	0.0529	0.1078	0	0	0.0398	0	0.0345	0
DJ00558	22.1588	20.7603	19.6334	72.93	44.0959	61.2694	56.9576	55.2994	61.5113
DJ00560	8.9971	20.5226	8.1808	7.3404	4.2489	13.074	7.937	5.8218	9.0369
DJ00561	5.2787	4.5266	7.8228	2.946	4.3519	4.8622	5.4904	4.8497	4.594
DJ00563	1.6094	6.9285	2.3766	1.8121	0.5849	1.6579	2.367	1.3227	2.8573
DJ00564	145.534	90.8384	177.012	3.917	6.694	11.6316	1.8406	1.2961	2.3358
DJ00565	0.8021	2.5889	0.4631	0.6786	0.9231	1.2313	1.0022	0.7106	1.2884
DJ00567	0.0867	0.1325	0	0	0	0	0	0	0
DJ00568	12.8295	12.3015	16.4556	17.7841	25.6414	22.1151	22.6719	25.3927	22.1343
DJ00569	3.4999	5.0336	7.7054	2.5166	2.174	2.7661	2.5774	1.8921	1.88
DJ00570	2.9878	3.1625	3.7345	1.7274	1.6147	1.708	1.602	1.1038	1.8588
DJ00571	81.5511	48.4383	62.6094	56.2613	48.3253	50.9228	39.9558	44.4887	47.5776
DJ00572	6.4729	9.3908	13.1583	8.3776	9.0343	10.499	7.7284	5.7454	8.354
DJ00573	12.3643	19.1038	14.0269	27.8251	20.9525	26.2371	22.2711	19.4966	24.177
DJ00574	9.7855	5.573	6.1521	8.569	5.6523	6.5347	7.2529	7.8029	6.6924
DJ00575	19.2797	43.7221	15.2378	23.1142	37.9954	24.4647	35.0132	40.0914	36.3118
DJ00576	2.7379	2.99	2.6263	74.1641	86.7986	79.2248	97.5672	85.6786	104.189
DJ00577	49.5146	48.2172	59.8238	0.5915	0.6227	0.8217	2.7099	1.8291	2.2675
DJ00578	20.034	15.3703	22.9482	3.0159	2.8235	3.4697	2.8836	2.427	3.6461
DJ00579	0.0545	0	0	0	0	0	0.0557	0	0.0606
DJ00580	313.263	190.274	230.363	53.5295	20.5642	33.9942	31.6651	34.2041	32.7506
DJ00581	0.1454	0	0.1511	0	0.1158	0.0837	0	0	0
DJ00583	0.5224	0.6276	0.4847	0.0913	0.0818	0.0537	0.1049	0.0558	0.0519
DJ00584	30.3547	18.0193	31.7199	11.6831	10.3131	14.3182	9.015	10.705	11.0005
DJ00585	27.7383	19.274	26.4968	12.3177	9.7679	12.1464	8.703	13.3976	9.8744
DJ00588	87.6577	47.2434	66.5846	7.0971	4.9357	7.0638	5.3848	5.2202	4.8257
DJ00589	28.1707	27.8139	33.1673	6.6618	4.8791	7.6317	3.9774	2.9443	3.6054
DJ00590	9.7537	4.2319	10.0673	6.0937	2.8878	3.5663	6.8386	3.8428	4.6904
DJ00591	11.5861	10.765	15.4853	12.4571	8.5193	10.3958	8.4177	6.0607	8.653
DJ00592	0.4414	0.27	0.9174	0.096	0.0703	0.4066	0.6318	0.088	0.2945
DJ00593	433.856	199.971	399.023	0.0749	0.2468	0.1585	0.0352	0.1029	0.421
DJ00594	44.3284	28.8943	60.1193	10.0693	7.17	9.1182	7.9911	7.0223	9.5502
DJ00595	7.7029	11.3006	10.8283	24.8126	31.44	30.6824	26.8359	23.1328	22.8704
DJ00596	17.8161	11.5433	14.1897	0.5421	0.1191	0.7459	0.2293	0.0248	0.1385
DJ00597	39.9538	48.3724	31.902	27.8603	18.6366	19.6588	14.1389	34.1393	13.0253
DJ00598	0.1813	0.5148	0.1884	0.0564	0.0206	0.0596	0	0	0.0288
DJ00599	75.9177	57.6805	66.4912	100.836	104.127	75.53	86.9016	75.1872	92.5071
DJ00600	2.3134	2.2737	2.6444	6.6867	8.6099	5.6315	10.9467	13.6703	11.4663
DJ00601	0.5008	0.4977	0.3383	0.0272	0.0199	0.0288	0.1536	0.0749	0.1949
DJ00602	4.3502	3.917	4.1648	3.8216	5.3757	4.2494	3.9417	3.4511	3.7657
DJ00604	53.3966	76.0112	46.3968	52.3753	26.102	35.3592	35.4056	24.7169	34.6212
DJ00606	11.5553	8.4365	9.2421	17.3014	30.8256	16.2942	31.9889	27.6941	29.815
DJ00607	7.7561	5.46	6.2044	10.8652	17.3825	11.5	18.4827	17.0746	17.8088
DJ00608	8.4908	12.6516	13.5341	28.1787	31.3013	27.5883	29.5721	31.5573	26.646
DJ00609	0.4529	0.2821	0.4532	1.4051	1.7508	1.6803	2.6924	2.7086	2.6862
DJ00611	1.4867	1.564	1.7434	1.0831	0.8476	1.0679	0.7251	0.5166	0.7736
DJ00613	3.3275	3.8565	4.8122	5.2043	3.9338	6.1439	7.0386	4.9673	5.4907
DJ00614	2.5937	4.0977	5.0312	5.8781	3.9263	8.0631	4.11	6.5924	4.8553
DJ00615	8.9485	9.5914	7.5108	12.5933	9.1486	9.4745	10.3958	7.2977	9.5336
DJ00616	13.3792	7.0645	11.9444	8.9525	10.7693	12.0165	10.1997	10.311	10.7369
DJ00617	0.6947	0.672	0.7956	0.8791	1.0505	0.7019	1.4059	1.5827	1.3244
DJ00618	2.4234	2.2834	2.5183	9.5024	8.9801	9.6034	12.3297	11.1785	10.2155
DJ00619	0.8144	4.2446	8.3088	10.6305	9.5553	12.7007	15.2129	22.1376	15.0661
DJ00620	3.5298	5.4949	6.3358	10.6118	10.022	13.5964	12.7287	22.6453	16.4865
DJ00621	1.2399	1.3879	1.6565	1.8304	2.2579	2.3452	3.1688	2.4275	2.7575
DJ00623	8.129	5.6901	11.4668	4.5102	5.254	6.3148	4.2721	4.6532	4.8285
DJ00624	30.1113	24.3459	29.9174	17.1388	16.7436	18.4982	18.5708	17.3053	19.0767
DJ00626	14.2875	8.4977	22.3041	6.3423	8.6777	8.4833	6.5828	7.5675	7.2673
DJ00627	21.8641	32.6278	27.3001	54.5337	49.2518	49.9268	53.7899	52.6377	46.2451
DJ00628	19.7382	14.2423	17.6681	14.0308	16.115	15.7506	16.4827	13.5054	14.452
DJ00629	10.4768	10.1283	11.3226	5.9964	5.3421	5.4931	3.9218	3.5344	4.8036
DJ00630	1.7672	3.0325	3.9296	2.7961	3.2983	3.5002	3.2469	2.6606	3.0646
DJ00631	42.8025	33.2339	35.4995	35.9922	31.9255	40.3118	35.1073	34.407	32.8608
DJ00632	1.3204	3.237	6.5294	1.3868	2.5393	2.6736	3.3049	1.9968	2.6835
DJ00633	1.0378	0.68	1.1555	0.4032	1.004	1.2803	0.8336	0.9606	1.4014
DJ00635	0.4574	0.0389	0.4753	0	0	0	0	0	0
DJ00636	46.2711	28.8693	46.165	7.8298	4.003	5.9733	6.4267	7.9662	8.6539
DJ00637	61.0081	29.5047	55.6521	33.9879	31.2788	34.2103	33.5077	30.2265	32.8148
DJ00639	0.7075	0.8321	1.1029	0.7697	0.065	0.5013	0.2504	0.3526	0.696
DJ00640	32.838	39.6294	45.9988	21.8987	19.8305	22.8968	21.5679	18.2792	22.8783
DJ00641	1.8103	2.4137	4.5061	3.4347	5.0983	6.3498	6.2838	5.2453	5.0562
DJ00642	7.3603	19.7643	6.0511	1.3682	0.4825	3.1109	1.905	0.5572	2.1758
DJ00646	0.5893	3.4811	0.5567	1.3987	1.4085	1.6038	1.6979	2.5632	1.4298
DJ00647	0.6606	0.7406	1.3271	15.9526	3.4735	7.7071	12.9213	9.8325	15.7692
DJ00648	7.7255	5.4887	8.527	9.2347	7.4938	9.0205	6.8494	6.2864	7.5718
DJ00649	26.4294	22.6583	21.1496	38.8533	35.9472	43.5657	32.7048	39.5434	31.6859
DJ00650	9.302	5.705	9.4826	5.2133	5.3399	6.2916	6.1108	5.8697	5.8801
DJ00651	0.057	0	0	0.8058	0.9534	0.328	0.6991	0.9656	0.4436
DJ00653	0.5306	0.2789	0.517	0.2525	0.1321	0.1146	0.0339	0.1983	0.1106
DJ00654	4.5263	3.0804	7.2849	0.9007	0.4838	1.3982	0.6772	0.6052	0.6138
DJ00655	91.0003	84.603	95.5246	121.99	158.386	130.457	135.141	138.067	126.876
DJ00656	15.1916	25.7054	17.9118	23.39	19.7611	19.6102	24.5207	20.2379	22.0918
DJ00657	230.232	350.603	229.353	309.923	272.737	283.218	343.135	312.639	326.808
DJ00658	0	0.0678	0.0922	4.535	7.9149	4.9021	8.6147	10.7861	7.3979
DJ00660	305.961	316.516	273.036	251.849	313.244	231.108	313.145	293.7	301.68
DJ00661	20.3934	22.1106	22.1606	15.9656	16.7046	12.8543	16.3785	13.7358	16.1618
DJ00662	0.357	0.091	0.4947	0	0	0	0	0	0
DJ00663	121.483	168.297	93.8953	57.9037	43.2264	68.9515	44.0348	69.0541	52.9612
DJ00664	27.4949	22.6106	20.3811	21.5932	19.9734	21.0033	12.8012	20.889	15.7715
DJ00665	60.1611	186.148	41.9175	32.1855	33.0805	31.0001	34.1803	25.3622	28.1865
DJ00666	27.3388	39.5236	21.3233	20.3658	16.2248	15.8099	17.4286	13.5939	17.0968
DJ00667	14.8356	25.9682	30.6753	30.0007	30.4586	38.0605	29.9448	28.5128	31.0498
DJ00668	23.1812	13.2744	18.3558	34.5219	34.2117	48.3574	36.0729	36.7047	37.241
DJ00669	15.7159	10.7618	15.4271	5.8471	5.0166	8.0749	4.3961	5.9189	5.9205
DJ00670	44.4068	35.2797	38.4857	198.65	267.809	205.022	165.618	229.823	177.035
DJ00671	2.961	4.6921	1.9552	4.0934	2.0888	6.8184	1.7028	1.7524	2.3324
DJ00672	0.0886	0.0271	0.0368	0.0386	0.0565	0.0816	0.0362	0	0
DJ00673	2.7922	1.8731	2.5463	3.4713	2.3154	3.7397	2.1263	1.6471	1.9644
DJ00674	0	0	0	0.0258	0	0	0	0.0472	0
DJ00675	5.309	3.6625	5.1133	5.0239	7.1528	6.1623	4.7215	4.044	4.8959
DJ00676	5.1749	5.2792	6.6841	6.8186	6.3295	6.3778	6.5385	6.6109	6.4436
DJ00677	1.4671	4.5947	4.5	8.4689	13.2913	21.4964	10.8137	11.0383	8.9207
DJ00678	3.7524	5.4436	4.0323	11.689	9.6482	13.5011	7.3235	7.3102	6.923
DJ00679	6.0676	11.4894	7.4015	20.1617	19.3506	19.0009	14.5542	14.2681	15.2303
DJ00681	67.9104	41.0398	61.5593	23.2114	18.5526	20.4169	27.9898	18.3547	23.5118
DJ00682	0	0.1012	0.2752	0	0	0	0	0	0
DJ00683	0.4541	0.2149	0.8538	0.0706	0.0345	0.0996	0.0663	0.0216	0.0962
DJ00684	25.9189	16.0437	22.5495	19.0449	20.1261	19.2113	19.8312	17.669	21.1145
DJ00686	0.1847	0.2117	0.1919	2.7118	1.1034	1.0631	1.0383	1.4725	1.4374
DJ00688	7.9464	8.3932	8.9826	6.6646	5.9202	8.2413	6.4805	7.7391	6.8468
DJ00689	0	0.0394	0	0	0.0821	0	0	0	0
DJ00690	8.9524	4.1515	8.5506	75.0081	127.756	90.2287	68.2048	73.4525	62.3682
DJ00691	1.4406	1.1716	1.8155	1.9339	2.8572	3.2291	2.4285	2.3219	2.2837
DJ00692	0.0983	0.1315	0.1021	0.2004	0.1272	0.1131	0.1381	0.1102	0.041
DJ00693	4.6123	11.6317	6.1606	15.3383	16.2566	16.0469	16.0167	13.7044	14.2723
DJ00694	23.0038	26.8552	35.2084	22.4278	18.0843	21.5656	20.8508	17.2311	19.8108
DJ00695	6.8659	8.465	6.0037	17.4879	17.7614	13.2556	18.7464	17.8599	20.7872
DJ00696	2.526	4.3626	1.0208	0.1018	0	0.0539	0.1435	0	0.104
DJ00697	10.6286	8.3089	13.9436	9.8355	10.652	9.358	10.5217	10.7857	10.9103
DJ00698	0.0821	0	0	0.0893	0.0981	0.0945	0.0629	0.0409	0.1141
DJ00700	0.9123	0.8524	0.474	1.4336	0.7673	0.7003	0.7773	1.263	0.9018
DJ00701	19.4469	11.9983	21.8182	9.7349	8.2267	9.7885	12.175	10.1549	13.9707
DJ00703	8.0876	7.7091	9.9607	5.9014	4.9321	5.4414	5.342	6.8338	6.44
DJ00704	69.4283	65.3253	44.9058	32.9508	21.9561	33.1162	20.7395	24.0521	23.3837
DJ00705	27.3705	54.6311	37.3635	423.899	489.026	474.211	410.834	413.858	384.712
DJ00706	1.894	2.663	3.62	8.8298	12.907	13.084	9.2318	9.203	8.5
DJ00707	14.9023	56.3231	35.1233	2.0783	0.7196	2.3997	1.9532	1.2118	2.7813
DJ00708	0.8216	2.5122	0.5122	0.1192	0.0873	0.1892	0.392	0.1092	0.0609
DJ00709	2.9646	3.1203	5.5364	4.6738	4.4158	5.7384	4.3925	4.4966	4.7301
DJ00712	0.3804	0.2684	0.3953	0.2865	0.5129	0.3032	0.4188	0.3208	0.3254
DJ00713	0.4348	0.3103	0.4519	0.2207	0.2079	0.2336	0.1185	0.1734	0.1612
DJ00714	0	0	0	0	0	0	0.0854	0	0
DJ00715	42.2647	21.0773	36.4745	9.2741	8.5266	9.6071	4.3579	7.0513	5.4464
DJ00716	7.0071	12.6198	6.0474	3.2298	1.8294	1.3218	2.226	1.8151	1.9811
DJ00718	0.6462	0.5434	0.8058	0.5624	0.4634	0.6696	0.4624	0.1932	0.5749
DJ00719	27.5364	74.722	52.1223	93.9948	88.8674	84.3097	89.9926	87.7958	89.2564
DJ00720	7.8252	10.2437	12.1179	16.9135	18.0108	18.6672	22.5358	19.9326	21.0441
DJ00722	0	0.0691	0	5.9007	3.6734	3.9554	6.8394	10.1826	5.5295
DJ00723	0	0	0	0	0.369	0.32	0.2841	0.0923	0
DJ00724	5.4244	9.1227	4.7747	46.4418	65.9437	52.829	48.1478	84.3441	43.4313
DJ00725	0.9259	4.5151	2.4219	5.3136	2.569	3.3083	1.534	1.0501	1.1716
DJ00726	0.4662	0.3189	0.4335	0.694	0.782	0.7628	0.5017	0.4402	0.4093
DJ00727	9.8008	9.1142	9.0297	5.7887	5.7691	7.5616	6.0944	5.6733	6.7041
DJ00728	3.0494	5.6612	3.5461	0.4739	0.4049	0.5016	0.3711	0.796	0.5652
DJ00729	12.986	8.4317	13.4772	9.3931	8.4516	9.8642	8.6897	7.9007	9.5273
DJ00730	383.627	438.662	340.978	432.723	333.362	414.609	345.699	284.119	353.375
DJ00731	1.9294	1.3409	1.5265	0.5486	0.4716	0.7573	0.0897	0.1967	0.2682
DJ00732	16.0557	24.7833	18.313	18.8908	19.6687	19.1072	19.7233	19.0248	19.1402
DJ00733	0	0.0211	0	0	0	0	0	0	0
DJ00736	0.3541	0.1354	0.4048	0.1926	0.1975	0.5301	0.3982	0.2471	0.1969
DJ00737	6.5801	6.0059	6.2189	4.7514	3.5251	4.7678	5.3643	3.9013	4.9203
DJ00738	40.657	26.8502	56.4789	55.9598	51.521	62.7388	52.2556	56.4164	49.6971
DJ00740	4.4728	3.7889	4.1455	4.9532	5.0082	5.2426	4.4903	4.418	4.5258
DJ00741	47.6577	56.4717	55.1907	67.0132	73.1825	78.6553	78.4695	84.1873	71.8878
DJ00742	61.6713	73.2711	60.4443	11.5584	12.3055	14.8823	11.8705	12.8836	14.374
DJ00743	6.8849	7.9277	8.3172	10.2512	8.0909	10.7016	11.2178	8.6639	11.5802
DJ00744	1.0901	1.9345	2.0633	8.1314	4.4666	8.2928	9.035	8.8477	9.0486
DJ00745	0.8797	0.3363	0.2285	1.7944	2.5408	1.5194	4.2721	6.5765	2.5681
DJ00747	0.2989	1.3385	1.7307	1.1149	1.429	1.2784	1.4407	0.4682	1.0448
DJ00748	49.4781	38.0484	48.4111	13.4624	8.8446	9.2265	12.5267	15.6573	14.6888
DJ00749	26.2522	24.9381	24.8233	23.5179	21.8383	22.2805	18.5994	19.9617	19.1583
DJ00750	23.0771	22.5041	19.5079	46.7211	48.7369	50.0291	50.9253	44.5735	47.8684
DJ00751	15.9022	21.9268	27.7239	22.7312	24.7632	25.4211	24.621	22.3673	25.9779
DJ00752	2.8153	1.6891	3.7774	2.6749	4.3441	3.4056	3.1696	3.2324	3.1704
DJ00753	0.2504	0.8137	0.976	49.584	211.258	127.238	228.387	147.969	135.077
DJ00754	17.9134	236.823	50.9946	27.5153	42.4661	33.7624	62.3227	46.765	57.2327
DJ00756	15.2216	10.773	14.5542	12.8261	11.0374	14.5506	13.0086	12.1203	12.9428
DJ00758	17.321	8.7051	16.73	11.7229	12.8962	12.3576	13.1136	11.1763	11.3533
DJ00759	0.6782	0.5844	1.0635	0.389	0.5109	0.6105	0.3278	0.295	0.288
DJ00760	5.933	5.8024	8.232	6.8506	7.4469	8.2813	8.2342	5.3851	6.266
DJ00761	14.3333	13.9454	11.2308	16.6758	13.7401	16.5029	14.9668	11.9946	16.195
DJ00762	60.3722	34.8749	55.6845	21.8399	20.3888	20.8912	23.657	22.783	22.9554
DJ00763	18.3844	15.7881	14.93	19.9816	23.1191	21.5843	20.4215	22.7838	20.0763
DJ00764	0.7897	0.6791	1.2309	1.0738	1.2583	1.4775	1.5642	1.1807	0.9879
DJ00765	0.0613	0.0468	0	0.1333	0.0976	0.0705	0.0626	0.2442	0.0681
DJ00766	8.6993	10.9972	9.8227	12.5766	15.3919	15.3926	15.4385	13.1752	12.4379
DJ00767	38.1551	30.0113	33.8464	27.0277	29.5196	26.1427	25.0247	22.8317	25.8077
DJ00768	0.3687	3.4528	0	6.9188	17.7725	7.9599	21.486	20.4888	24.7041
DJ00769	1.4553	1.6977	2.0893	2.7819	3.016	2.9638	2.6403	2.004	2.4603
DJ00770	4.1225	5.5399	8.2974	9.5827	12.8959	11.9413	9.8931	11.1161	10.3753
DJ00771	44.0597	27.5413	45.6391	43.0744	34.9534	35.3156	34.1908	33.7095	48.2651
DJ00772	5.3894	6.0807	7.1236	10.0147	15.071	13.2542	16.2015	17.6677	13.8202
DJ00774	125.019	111.314	153.135	54.0055	60.2371	58.2356	47.2357	41.7505	47.8129
DJ00776	0.4024	1.0868	0.4181	5.5443	4.424	8.9568	2.6327	5.3208	4.9817
DJ00777	0.439	0.7271	0.6083	0.7959	0.4664	1.0109	0.6732	1.8233	0.4882
DJ00779	0.6997	0.312	1.1513	1.6809	2.0905	2.2826	0.9836	1.453	0.616
DJ00780	22.2488	11.8844	20.7986	3.1392	2.225	4.716	4.0923	1.8558	3.2092
DJ00787	0.1578	0.2585	0.2812	0.2698	0.2515	0.1817	0.2536	0.2472	0.2006
DJ00788	0.2161	0.4131	0.6738	1.1756	1.1193	1.742	1.5468	0.9695	1.0816
DJ00789	0.6186	0.1891	0.5142	0.5383	0.8871	0.8546	0.6324	0.9865	0.8254
DJ00791	0.1297	0.0875	0.3646	0.2406	0.2917	0.281	0.3742	0.3269	0.2884
DJ00792	2.2842	2.4771	1.9872	3.0626	2.8567	1.9877	2.9325	2.6738	2.7173
DJ00794	33.2931	25.8843	32.4271	35.8921	37.6724	34.8635	40.2277	36.9312	37.5211
DJ00795	5.4202	5.0539	6.9206	8.6723	9.4693	9.8506	9.3927	8.6004	9.1628
DJ00796	9.9246	8.1858	10.3909	14.1647	12.2768	15.5508	13.9224	13.9086	13.6505
DJ00797	5.3727	3.0505	4.9598	4.511	3.8026	2.9729	5.5193	2.9635	5.1626
DJ00798	0.1456	0.1669	0.1009	1.2669	1.4499	2.2349	0.2729	0.7739	0.5396
DJ00799	2.1644	6.8673	2.0315	7.8481	8.7147	14.5768	5.7816	5.0337	5.5643
DJ00800	28.1843	22.9659	26.0314	22.2334	21.2421	22.2694	22.4284	20.5505	24.3219
DJ00801	0	0	0.0735	0	0	0	0	0	0.0786
DJ00802	16.872	32.811	30.3921	109.641	91.6928	146.996	77.7654	74.8084	85.6885
DJ00803	32.7309	30.6574	30.3369	36.7392	37.2914	34.5985	36.2407	34.1088	37.5163
DJ00805	0.176	1.1664	0.7521	0.2766	0.1247	0.2928	0.38	0.078	0.6091
DJ00806	50.9377	32.7485	47.1949	29.4321	27.0186	29.9862	32.3175	30.2244	36.2282
DJ00807	0	0.0187	0	0	0	0	0	0	0
DJ00808	14.9865	12.3293	15.2768	14.9827	15.9768	15.0364	15.9047	16.5025	15.4355
DJ00809	0.1792	0.7878	0.3259	0.1462	0.0357	0.1032	0.1832	0.0447	0.0997
DJ00810	23.9564	13.4084	18.9326	4.8146	4.1979	5.6351	3.232	4.4115	5.4427
DJ00812	0.919	1.1349	0.4408	0.0769	0	0.1628	0	0.0705	0
DJ00813	4.9893	9.0473	12.0574	12.6218	15.9001	14.2676	15.2782	12.8835	13.4449
DJ00814	5.6711	4.0053	8.6001	6.2986	6.9019	7.7635	8.5216	6.7802	7.3493
DJ00815	2.7114	2.0317	2.9401	4.8264	6.2329	5.3058	5.2808	3.7921	4.4214
DJ00816	8.2913	4.5569	7.7714	0.7664	0.734	0.8111	0.7756	0.7022	0.7834
DJ00817	0	0	0	0	0	0	0	0.1288	0
DJ00818	3.056	15.9325	16.323	14.6935	24.591	23.0113	23.744	23.2106	22.7692
DJ00819	11.2027	29.5148	9.9784	234.37	337.171	191.978	326.507	637.366	350.599
DJ00820	1.2799	4.3652	1.2277	37.5913	48.9458	34.3466	49.7215	78.4071	75.1058
DJ00823	0	0.0902	0.0818	0.2568	0.0313	0.2718	0.0402	0.0784	0.2187
DJ00824	10.4426	9.7503	19.1406	14.0004	22.4113	20.4973	18.9092	16.8227	16.412
DJ00826	3.2672	1.3876	1.8862	0.3949	0.4049	0.8359	0.1485	0.2171	0.4037
DJ00827	71.259	28.1617	76.4499	18.5417	16.6465	19.2452	23.384	16.2221	15.8975
DJ00828	0.1106	0	0	1.0829	1.4982	4.5849	0.6785	1.7641	1.5991
DJ00830	172.286	196.998	183.656	191.258	26.3557	70.073	131.664	92.0559	133.191
DJ00832	150.426	115.728	129.947	26.7112	9.1012	18.0512	24.2423	21.4915	26.594
DJ00834	0.0763	0.2916	0	0	0.0304	0	0.078	0.038	0
DJ00835	3.9969	17.4014	7.9113	0	0.0607	0.263	0	0	0.2117
DJ00836	71.0215	74.7549	69.16	97.0281	103.823	88.2523	99.0059	83.1664	96.2752
DJ00839	17.707	20.4743	23.8098	30.9255	37.1473	39.955	39.2067	38.5358	33.4945
DJ00843	10.5101	12.2921	8.308	13.0942	10.8785	11.8942	11.5713	12.0875	13.2861
DJ00844	0.1454	0.389	0.1511	2.5306	8.6879	3.1807	5.9457	9.2025	6.4674
DJ00845	165.749	145.81	130.464	980.624	825.351	826.235	704.518	703.389	753.143
DJ00846	81.7917	36.2299	57.6698	17.4622	19.8539	18.3064	17.0362	20.267	18.1912
DJ00847	0	0.0355	0.0482	0	0	0	0	0	0
DJ00848	0.3242	0.1416	0.385	0	0.0369	0.3733	0.0474	0	0.0515
DJ00850	1.5157	2.062	2.8564	1.537	1.5555	2.2479	1.7859	1.1522	1.6855
DJ00851	24.7104	42.6863	32.1549	38.4922	38.5535	39.1854	42.4259	34.2259	40.6269
DJ00853	97.9257	106.705	128.775	95.8367	91.2774	97.4705	114.642	97.3173	98.4555
DJ00854	14.7128	12.0646	13.2891	13.7483	11.4493	11.9416	15.1725	13.1941	14.435
DJ00855	0.7517	0.8028	1.3096	0.5291	0.5461	0.7128	0.7233	0.4848	0.6516
DJ00856	22.2874	19.2018	27.065	3.4715	2.5835	4.4447	2.8942	2.0009	3.2626
DJ00857	2.0507	1.8339	1.2867	1.9782	1.8496	1.5592	2.2151	2.5454	2.1944
DJ00858	0.163	0.2242	0.1693	0.2482	0.5453	0.4878	0.4998	0.2924	0.3987
DJ00859	181.178	133.704	146.947	46.6003	41.0324	45.7888	44.911	55.3455	56.0587
DJ00860	10.4634	10.6961	14.2027	6.6176	6.4623	9.5724	7.3387	6.5891	8.2533
DJ00861	41.3419	52.8331	57.9342	49.3745	48.7812	47.9612	53.2146	45.6581	50.3968
DJ00862	66.0563	69.9762	50.7324	67.1946	56.0055	54.0645	57.3396	50.9361	59.3669
DJ00864	9.6421	16.117	14.581	17.1029	12.5549	18.8478	13.6458	12.5153	13.7231
DJ00865	2.7794	3.8711	3.429	0.8974	0.6572	1.1544	1.3364	0.8349	1.1008
DJ00867	15.0555	24.2858	14.2251	4.46	3.9448	6.0877	5.3367	3.9526	4.5593
DJ00868	27.6698	14.2067	17.6813	7.3377	4.9793	8.5906	7.093	6.1471	6.2152
DJ00869	1.2008	0.7324	2.0975	4.3079	4.0508	5.398	3.2519	3.0432	3.239
DJ00870	34.2854	12.9773	25.845	5.4835	5.0497	7.6816	4.6229	3.6944	5.5645
DJ00871	2.8964	3.2877	2.9414	5.466	4.1606	3.6379	4.3743	3.2587	4.1969
DJ00872	22.2902	22.0886	20.0176	9.22	12.497	9.3785	10.6906	8.887	11.2003
DJ00873	0	0.0382	0	0.0272	0.0398	0	0	0	0.0278
DJ00874	63.9085	43.2781	54.2614	21.3072	18.2728	22.4946	22.8342	19.9218	21.9486
DJ00875	184.415	116.586	121.772	2.2937	0.7436	1.3532	0.8128	0.8614	1.0379
DJ00876	2.2279	3.9375	3.5046	5.5364	5.9276	4.6596	4.9524	2.9948	4.3414
DJ00877	28.1354	91.4234	23.9822	2.9444	2.27	4.5106	5.0974	3.5498	13.1488
DJ00878	44.1853	29.3001	37.4803	17.1023	11.8708	17.2733	14.9172	14.7487	16.4549
DJ00879	9.5315	10.1954	15.8303	16.7011	23.4564	19.6547	21.7203	17.455	20.4161
DJ00881	7.0738	23.1296	8.1695	1.5215	1.5883	2.1102	1.3642	1.0736	1.6448
DJ00882	1.3721	0.851	1.7218	1.2673	0.9901	1.6693	1.4293	2.0386	1.7274
DJ00883	0.7623	0.777	0.9242	0.8293	0.2025	1.024	0.7794	1.5197	2.402
DJ00884	12.2349	30.4089	12.9647	9.2116	3.9375	7.2516	10.7213	3.1539	9.1822
DJ00885	0.3365	0.1608	0.0437	0.7322	0.5027	0.9687	2.2364	0.6709	2.8069
DJ00886	0.8746	0.2674	0.0909	0.1903	0	0.2014	0.2682	0.3487	0.4863
DJ00887	0.0676	0.0517	0.0351	0	0	0.0779	0	0.0674	0.0752
DJ00888	3.5644	6.7198	4.4002	5.2767	3.3522	4.3816	4.1371	3.3925	3.9637
DJ00889	36.6575	45.577	38.8932	61.5066	54.093	62.6262	57.1156	59.49	57.9194
DJ00891	3.2597	4.3327	3.7536	2.0764	1.4506	2.333	2.1916	1.5221	1.8288
DJ00892	0.0368	0.0563	0.153	0	0	0.0424	0	0	0
DJ00893	47.4753	42.6797	49.0993	5.3899	4.6184	5.6302	4.6681	3.712	4.8257
DJ00894	3.6727	6.1768	3.9184	29.4583	10.222	15.9562	17.5722	9.1275	13.3419
DJ00897	5.6552	5.0513	8.145	4.3602	5.2486	5.9172	5.0309	3.6985	5.4283
DJ00898	5.3999	9.4458	6.8988	0.4146	0.6074	0.5852	0.7794	0.4749	1.095
DJ00899	5.9111	10.1781	9.6015	15.1701	12.6652	14.0081	16.545	13.6712	15.9548
DJ00900	1.898	1.0076	1.6984	1.6059	1.9742	3.0352	1.4014	1.4714	1.9934
DJ00901	0.6822	2.5273	2.6721	2.683	3.0521	4.4107	4.2383	2.7722	3.268
DJ00902	4.9747	4.7342	5.1695	5.1293	4.4038	4.9354	5.6508	4.8797	5.1306
DJ00903	5.4663	14.4056	14.1014	40.4245	49.2432	46.7614	47.4031	46.36	46.4441
DJ00904	1.6307	7.9862	0.8473	1.5522	1.624	1.1735	1.9797	1.2191	1.7568
DJ00905	17.9651	16.8651	13.3181	16.1492	16.9781	17.2226	16.714	13.5235	17.0105
DJ00906	0	0	0	0	0	0	0.0616	0	0
DJ00908	8.1383	8.4029	9.9673	3.3055	3.0314	4.7155	3.4307	2.6337	3.9374
DJ00910	10.8264	17.7151	8.9929	1.8119	1.8174	2.0011	1.3326	0.794	1.208
DJ00911	4.1711	8.9511	16.0941	7.325	9.7461	10.6172	9.8671	9.0422	9.9218
DJ00913	0.1939	0.0741	0.1007	8.7517	3.8613	2.0088	22.098	52.1716	6.5752
DJ00914	9.815	7.0824	6.3866	10.2777	4.8965	7.921	6.2831	19.6574	14.995
DJ00915	22.6299	19.5896	21.361	24.968	23.3907	26.1084	22.0514	23.2911	23.2178
DJ00916	0.095	0.363	0.4935	0.8265	0.9837	1.7496	0.9709	1.2306	1.0561
DJ00919	11.8433	15.1799	18.0095	8.5459	6.6679	10.5451	9.2826	7.7517	9.7021
DJ00920	11.558	12.9944	12.8053	10.006	8.3903	9.7856	12.3074	9.3643	12.367
DJ00921	28.48	21.3157	33.6243	8.002	6.7715	7.2678	8.7399	6.8862	8.6225
DJ00922	49.8205	40.1637	36.5864	11.1644	8.9349	10.8776	7.9213	7.6553	9.2212
DJ00923	0.5238	0.4004	0.1089	0.2279	0.1669	0.1206	0.0535	0.1044	0.1165
DJ00924	16.7941	8.406	12.8811	9.5693	7.4068	9.131	7.7669	6.4433	7.9668
DJ00925	38.4688	27.7545	55.0355	20.1393	12.2716	22.6264	19.3924	19.1717	23.1614
DJ00926	38.0588	51.1726	33.7293	47.3466	39.7305	42.0327	33.9415	32.1503	37.2203
DJ00927	45.9956	42.2863	40.7161	32.5901	28.763	28.9495	31.834	26.5963	28.2704
DJ00928	19.3394	21.213	16.8447	18.4188	20.0368	16.7417	15.899	17.5807	16.5804
DJ00929	2.4976	3.1058	1.9033	18.258	17.2194	15.9506	16.5801	35.55	25.2566
DJ00930	0.1932	1.883	1.5057	0.0525	0.0385	0.0556	0.0494	0.0963	0.0537
DJ00932	8.2195	24.9385	16.6054	25.5465	20.5	35.2683	24.5306	37.1979	24.6963
DJ00933	59.7065	43.8094	46.2735	53.9298	48.1966	54.8964	33.484	48.2017	47.17
DJ00934	33.5816	30.035	28.3724	15.9368	11.6722	11.6104	10.8927	11.0942	12.5891
DJ00935	6.7775	19.6729	6.3965	2.2794	0.8869	2.1111	2.3765	1.2075	2.3666
DJ00936	57.089	58.2673	46.1453	39.3858	34.0822	35.6408	25.9952	51.2707	32.6819
DJ00939	433.437	211.177	586.803	12.091	4.9049	21.2095	82.4319	16.4749	38.3864
DJ00940	18.1861	68.0662	16.9708	10.0498	7.8531	15.8717	19.2615	11.9637	17.3925
DJ00943	34.2076	57.1594	19.6424	0.5914	0.5331	1.4926	0	0.1667	0.279
DJ00947	48.6397	136.825	47.5299	33.5866	24.1192	35.2653	28.9624	23.0538	33.1173
DJ00950	8.8302	10.5803	8.083	3.9446	2.6464	3.2189	3.2544	1.9313	3.1706
DJ00951	1.0249	0.7153	1.2966	3.9263	6.3903	4.5149	7.3799	8.4388	6.2437
DJ00952	0.5052	1.2444	0.8166	0.7327	1.2075	0.9694	0.8034	1.1749	0.6866
DJ00953	52.2796	77.1422	47.8659	125.568	161.543	142.184	144.36	147.048	130.143
DJ00954	0	0	0	0	0	0.0852	0	0.0738	0
DJ00956	3.8066	4.8305	10.2056	331.183	77.032	131.614	83.3572	19.3123	67.5599
DJ00957	6.9305	14.346	5.5422	1.4892	0.2272	0.6239	0.4082	0.7391	0.6026
DJ00958	27.3496	9.7687	26.7204	4.5771	2.359	5.1137	3.1864	5.9802	3.466
DJ00959	68.7913	141.906	64.4698	48.2286	19.3947	31.483	82.6748	52.4533	68.7406
DJ00960	0	0.0912	0	0	0	0	0.4471	0.0396	0.0884
DJ00961	26.4422	22.6117	23.4288	12.9025	8.8837	12.5842	12.5016	8.5736	12.6994
DJ00962	12.0512	28.6719	19.9989	20.7678	22.1421	25.0961	24.3264	19.8565	23.0082
DJ00963	5.0428	18.6325	9.5808	9.7799	6.1077	10.4393	3.2807	2.9194	3.9085
DJ00964	2.6974	54.6725	1.7619	122.902	217.052	78.3512	344.856	391.685	349.666
DJ00965	9.5952	9.2953	6.8766	10.5278	13.8395	10.4762	10.0632	13.6039	11.4982
DJ00966	9.532	8.1374	8.7106	4.9223	4.0483	4.3985	5.4602	4.3623	7.0942
DJ00967	19.3525	18.3813	30.1836	15.4256	17.3287	21.4537	22.5859	15.8412	18.3594
DJ00968	15.2143	77.3837	20.4281	57.1066	63.3677	66.6002	86.0859	47.7462	54.4422
DJ00969	18.9662	68.5267	17.5753	29.9322	43.4879	37.2263	28.5502	49.7171	30.682
DJ00970	1.1653	3.7659	3.688	4.1488	4.8111	4.3912	4.3864	4.1182	3.5932
DJ00971	15.0452	16.0321	21.4943	22.9702	28.4374	26.8817	26.4569	23.8216	24.3759
DJ00972	1.7258	2.4684	2.7962	4.542	3.6222	5.2133	4.8187	2.9779	4.1272
DJ00973	22.0174	24.3549	22.5033	21.4753	19.4009	21.5285	24.8059	19.8074	22.4373
DJ00974	43.4994	33.702	45.5244	87.7152	62.6922	73.6674	66.485	75.4139	75.1023
DJ00976	46.0255	38.8722	45.6047	101.658	98.632	114.093	97.8451	89.4629	102.495
DJ00980	4.8853	2.4008	4.3917	5.9891	12.9739	6.7854	8.9185	10.8208	9.5287
DJ00981	0.3504	0.0893	0.4046	4.2351	12.0661	3.6757	14.3685	14.5909	9.4383
DJ00982	7.8697	114.558	90.5601	112.011	105.929	144.116	132.876	117.991	126.021
DJ00983	61.6738	58.9379	64.8811	76.5405	78.152	73.421	89.3809	83.8696	84.7308
DJ00984	10.3881	8.4927	11.8446	10.5156	15.6907	15.9474	12.5376	12.8709	11.6323
DJ00985	1.529	3.3495	3.5335	3.5748	4.6	5.0449	4.4095	3.7532	3.7052
DJ00987	187.204	101.127	131.506	5.0963	4.0197	12.9905	5.8098	3.4815	5.1174
DJ00988	126.996	73.0456	112.747	46.9529	40.1025	48.1354	54.8116	55.0089	46.4427
DJ00989	25.9847	19.463	21.4224	19.9745	18.7355	20.0045	18.0149	16.6104	16.6445
DJ00990	3.7233	3.8382	3.2829	8.1004	5.5283	6.885	4.6331	7.4223	5.2069
DJ00991	14.2437	23.6116	24.6694	26.7682	23.876	26.2161	24.6871	25.1378	25.1504
DJ00992	3.9	8.2642	9.101	5.0798	5.4104	5.7705	4.9489	4.7739	5.6305
DJ00993	1.3906	1.3487	1.251	0.2258	0.2315	0.3107	0.2122	0.3724	0.3231
DJ00995	0	0	0	0	0	0	0	0	0.0959
DJ00996	85.0785	57.0839	110.825	45.5374	29.6354	49.8505	33.544	16.2131	26.4237
DJ00997	9.6641	11.5922	8.2464	13.205	11.2677	11.9411	12.0085	11.0814	12.6692
DJ00998	19.3547	21.5132	22.7698	39.5382	46.6602	40.3205	37.7207	34.6474	34.8403
DJ00999	1.99	2.7119	3.1469	3.4197	3.5386	4.2505	3.2139	2.7022	3.079
DJ01000	0	0.1003	0.1363	0.7611	1.0104	1.2588	1.3859	1.5256	0.9726
DJ01001	16.365	13.1382	15.9196	11.9647	8.253	10.6002	10.6337	8.4748	10.606
DJ01002	19.3087	59.8584	21.5444	0.1936	0.0709	0.3073	0.091	0.1774	0.2968
DJ01003	9.7499	6.4444	12.3883	1.5747	1.3908	1.6667	1.3493	1.0185	1.1363
DJ01004	7.2017	11.1127	18.5709	14.2174	20.082	24.7219	18.4063	23.5286	16.3138
DJ01005	2.806	1.8089	2.4807	1.7768	2.9363	1.5672	2.2692	2.5881	2.4451
DJ01006	54.7264	26.3038	55.4779	25.745	25.3584	23.6217	23.7387	27.7685	27.4772
DJ01007	8.6577	6.4673	7.4357	12.5142	11.9687	16.4771	11.5993	13.6732	13.1008
DJ01008	1.3742	7.0217	3.833	1.0228	0.9796	1.832	2.8836	0.8651	3.4584
DJ01009	216.096	196.66	169.281	110.834	109.031	117.145	129.697	111.96	111.024
DJ01010	8.5419	8.1741	8.4295	0.1337	0.0979	0.2123	0.1885	0.1838	0.2734
DJ01013	3.0255	1.619	4.2323	2.7595	3.4302	3.7782	6.0433	5.1033	4.5291
DJ01014	26.2673	35.3418	32.9569	15.1091	12.7474	14.8754	19.1563	13.6452	17.5389
DJ01015	0.5322	0.1356	0.1843	0	0	0	0	0	0
DJ01016	21.4527	23.901	22.1863	38.5442	48.0694	53.4889	44.7448	40.044	38.3299
DJ01017	4.8974	7.772	5.7335	0.7418	0.1482	0.2141	0.507	0.1236	1.0341
DJ01018	32.702	27.2498	42.1086	34.3683	37.4041	37.5792	46.216	34.6148	38.2319
DJ01020	0	0	0	0.1604	0	0.1698	0.2262	0.441	0.164
DJ01023	6.1516	5.237	5.3756	4.2584	3.1189	4.1853	2.8586	1.951	2.4876
DJ01024	0.0402	0.0614	0	0.0874	0.064	0	0.2054	0.2002	0.0447
DJ01025	0	0.1691	0	0.3209	0.4113	0	0.1508	1.029	0.738
DJ01031	20.6031	9.6119	14.9174	4.0724	2.1187	3.478	4.0912	3.5513	3.9622
DJ01032	11.1438	8.797	11.1679	11.0432	11.0651	11.1554	8.891	8.0751	8.2003
DJ01033	3.5258	3.2729	6.63	10.0452	13.4435	10.3421	9.6122	8.6185	9.6155
DJ01034	88.7996	145.759	96.7382	49.727	37.4605	56.6239	73.1997	51.7418	56.7929
DJ01035	0.5732	0.4612	0.4075	0.722	0.8412	0.9031	0.8327	0.7217	0.8722
DJ01036	143.213	60.0324	131.635	81.7297	73.0363	73.5144	77.8585	88.4974	93.7448
DJ01037	53.6852	38.2839	48.4982	36.9898	26.5481	39.0388	30.978	41.9535	40.0892
DJ01038	5.9883	4.9681	7.2962	5.1886	6.537	6.5874	7.8424	6.3968	7.5885
DJ01040	2.5253	1.5857	1.8744	3.1885	2.6227	3.4268	3.3654	2.9665	3.059
DJ01041	10.9309	9.2525	9.7672	10.0393	10.4114	12.8468	14.0751	11.687	11.1672
DJ01043	1.4033	1.5019	1.6041	0.458	0.4472	0.4847	0.5739	0.9791	0.3121
DJ01044	7.8826	7.8352	12.0625	2.2165	2.5252	2.9147	3.5138	2.831	3.5246
DJ01045	0.0685	0.1047	0.3025	0.298	0.5047	0.4534	0.4201	0.2901	0.2665
DJ01046	9.4526	8.1293	9.4231	9.0571	11.8001	8.036	12.81	23.9105	12.6202
DJ01047	114.03	296.845	111.95	63.5229	86.7329	49.6312	29.6686	21.5181	28.4153
DJ01048	22.5944	16.9113	19.4781	10.1159	9.7242	10.0796	12.6635	11.4414	11.7551
DJ01049	16.2221	22.6256	24.9079	32.5562	60.5075	25.0814	18.2766	10.6915	15.0209
DJ01051	18.1395	14.8675	24.9391	8.7473	15.8923	9.6173	5.2256	4.5356	4.991
DJ01053	7.7289	8.7408	7.4935	7.9742	5.3008	10.8713	8.9605	7.4258	8.6392
DJ01054	0.0936	0	0.0972	0	0	0	0	0	0
DJ01058	37.6927	36.0834	58.8368	11.6866	5.3541	9.2639	8.9734	7.2223	8.3883
DJ01059	54.5701	42.2405	58.7121	34.5539	29.235	34.7466	39.5735	39.6084	43.1417
DJ01060	10.0427	10.8616	8.7918	32.8438	29.5348	35.432	58.1681	52.3349	53.0026
DJ01061	23.6183	16.3687	21.4564	17.3095	16.8487	15.9841	15.3955	13.4564	15.7653
DJ01062	0.3419	0.2614	0.5329	0.3719	0.4086	0.5905	0.3495	0.1704	0
DJ01063	20.9774	14.0996	20.0012	18.6521	19.6913	19.2083	24.8253	22.6026	22.7781
DJ01064	5.3934	6.8828	4.3843	19.5882	17.3267	17.5277	12.9842	13.2228	15.2361
DJ01066	6.0698	3.3663	5.8128	25.5049	25.9811	22.336	25.673	32.5039	29.3818
DJ01068	1.3493	0.4389	1.8795	1.5615	1.075	1.5536	1.3795	1.6025	1.4047
DJ01072	13.3299	8.7533	10.9073	18.0232	6.796	19.7421	12.2677	10.9231	11.7044
DJ01073	13.1611	9.3052	10.0166	181.412	194.575	266.497	135.023	198.866	162.642
DJ01076	0.1504	0.0575	0.1563	0	0	0	0	0	0
DJ01080	25.6285	62.7561	14.2711	5.498	2.6845	3.5856	6.1065	2.1881	4.7689
DJ01082	0	0	0.1031	0	0	0	0	0	0
DJ01083	25.1635	23.1852	21.3658	9.18	1.5484	2.6499	3.9216	3.4665	6.0288
DJ01084	14.484	14.4022	12.8065	14.6387	12.9504	12.9253	16.9073	16.3782	19.2968
DJ01085	13.9494	17.7515	17.0905	25.7673	23.8586	21.1206	21.7316	20.3415	21.1767
DJ01086	9.5427	13.3014	10.6892	6.8755	6.9906	7.7909	8.8182	7.8563	9.7574
DJ01087	3.0784	3.5442	3.7772	0.8069	0.5614	0.8114	0.6825	1.0721	0.9899
DJ01088	26.4168	40.3572	24.0307	4.0732	4.2618	5.4956	2.6922	3.8142	3.5691
DJ01089	0.5635	1.1655	0.93	1.1538	0.9771	0.9922	1.0166	0.6277	0.8846
DJ01090	273.137	208.098	253.185	210.163	200.11	216.479	226.075	201.19	239.616
DJ01091	1.187	1.0507	1.623	1.3592	1.7421	1.7263	1.2774	1.2454	0.9031
DJ01094	340.446	722.971	941.21	1267.83	1016.94	1352.14	1402.35	1701.89	1951.58
DJ01095	205.834	134.03	190.551	94.336	94.2141	109.791	127.388	120.473	134.924
DJ01096	7.1763	5.6637	8.7002	5.1681	7.3586	7.0384	8.0498	6.7555	7.3892
DJ01097	50.5577	21.267	45.3967	21.5133	22.8336	21.1674	23.5842	24.4916	22.3858
DJ01098	45.7309	46.1196	38.1658	32.2052	33.6382	32.9155	21.0098	24.4387	23.193
DJ01099	60.5503	50.8878	58.3439	102.98	96.3545	62.6019	179.335	128.524	158.03
DJ01100	26.6328	21.7729	23.1525	22.1359	15.709	18.2153	21.0068	17.5185	19.5581
DJ01101	5.8643	11.6179	10.214	7.3676	6.9096	7.9883	5.742	4.8573	5.6948
DJ01102	23.9167	40.1328	27.6955	41.5919	39.4341	36.0573	40.7329	34.689	37.4497
DJ01103	4.1101	2.5871	3.8622	3.5578	3.5533	3.5039	3.8174	3.7742	3.4231
DJ01105	69.5573	15.0352	55.5324	0.3131	0.0764	0.3314	0.5885	0	0.5335
DJ01106	18.1086	38.4862	22.8539	7.5521	7.9293	8.9994	10.0258	6.8714	11.0676
DJ01109	0.2048	0.2348	0.3724	0.5569	0.6934	0.8252	0.5757	0.3572	0.2846
DJ01110	28.8391	39.2817	35.1935	66.974	112.313	81.045	80.852	64.5503	67.4814
DJ01111	0.236	0.4898	0.4205	0.2201	0.0269	0.0776	0.655	0.2689	0.375
DJ01114	50.272	28.5792	37.8382	33.0382	46.5229	35.5481	37.4994	29.737	28.7361
DJ01116	31.3815	45.0855	35.9098	47.2207	69.2179	66.9208	33.4553	65.2967	42.7054
DJ01118	6.6662	4.9613	5.7067	6.6766	11.1135	7.9796	9.2469	10.0399	9.4052
DJ01119	6.7159	5.0606	7.0786	9.706	9.249	12.2614	6.9639	7.1721	6.0814
DJ01120	1.629	1.3299	1.9557	1.0322	0.6426	0.8012	0.9216	0.3941	0.4221
DJ01121	1.7844	1.0957	3.055	2.6571	2.9715	3.8396	2.4822	2.7116	2.2283
DJ01123	1.5966	1.7901	1.7698	7.2946	5.2578	6.1276	3.9174	5.0925	3.0775
DJ01124	0.0316	0.0483	0.0493	0.0344	0	0.0364	0.0162	0.0315	0
DJ01125	1.0491	0.4857	1.8579	0.209	0.3061	0.2552	0.287	0.2651	0.1643
DJ01127	0.9513	1.8908	1.2852	9.6242	10.4595	7.8863	7.6832	5.879	8.0401
DJ01129	0	0.0248	0	0.0353	0	0.0374	0	0	0
DJ01130	13.6954	10.5363	17.6232	6.4664	9.0309	11.5747	20.972	19.8662	21.4839
DJ01131	0	0	0	0	0.0317	0	0.0815	0.0397	0.0443
DJ01134	8.462	7.3618	6.5433	5.8268	5.4252	6.3312	6.6411	5.5093	6.5586
DJ01135	4.2355	5.6146	7.9132	7.4503	7.6106	9.3901	9.7196	9.4764	9.2197
DJ01136	23.4978	20.5291	31.0072	20.8952	24.4786	30.9732	25.929	29.4623	24.6789
DJ01137	1.2135	0.333	0.7437	0.3046	0.3471	0.5374	0.0318	0.2481	0.1038
DJ01138	0	1.2887	0.0815	0	0	0	0	0	0
DJ01139	10.6809	12.3195	12.5062	16.5691	23.7761	19.1177	20.5508	17.4499	18.0884
DJ01140	1.6199	3.5893	1.2686	22.5753	37.7631	28.8948	26.1844	29.507	27.673
DJ01141	29.0552	19.8733	30.1352	22.1936	24.9614	22.9749	25.3952	20.9861	24.1604
DJ01142	7.5724	8.5469	10.2828	9.1638	10.0674	9.824	9.752	8.2268	9.1957
DJ01143	56.781	55.2351	41.5015	7.2346	3.9673	5.5795	9.5324	4.2972	6.6153
DJ01144	12.9819	11.7945	16.5451	7.3382	7.5405	5.6149	5.9063	3.726	6.1222
DJ01145	109.349	67.4593	97.5213	64.5091	45.6969	60.8124	51.8273	42.833	50.5413
DJ01146	3.2072	4.9584	6.1682	5.3634	6.3881	7.468	6.7779	5.7971	5.8289
DJ01147	42.8508	48.7423	44.8504	47.6594	45.4926	46.5697	48.3006	42.1293	49.2175
DJ01149	46.0792	46.5883	32.8789	44.8896	33.836	42.1336	51.5221	52.7018	53.997
DJ01150	1.2383	1.9284	3.8605	2.8189	2.1742	2.9044	2.5554	2.4915	3.4172
DJ01151	58.6317	37.6477	48.2032	41.7962	52.7044	42.578	37.6019	48.0039	38.0648
DJ01152	10.1722	12.7169	16.5945	18.1443	20.1016	20.8666	22.7059	19.0383	21.8088
DJ01154	26.423	13.223	25.2596	9.9721	16.8545	11.7965	2.7988	12.1141	5.7199
DJ01156	0	0	0	0	0	0.0517	0.0459	0.0447	0.0998
DJ01157	145.781	124.939	144.466	92.0142	79.5448	79.5969	88.0439	81.8728	97.2293
DJ01159	4.5849	3.8764	6.016	8.0214	8.2147	8.5874	6.2641	6.9708	6.9783
DJ01160	18.3333	11.69	18.2501	20.8284	24.2644	20.4179	20.757	19.3409	18.482
DJ01162	40.4852	114.016	65.6609	108.736	114.212	111.45	126.45	89.432	104.743
DJ01163	0.1614	0	0.0839	0.0878	0.0643	0	0	0	0.0897
DJ01166	21.1623	16.6039	18.5446	12.548	8.7693	11.1183	8.972	6.9921	8.8781
DJ01167	7.8766	27.1771	7.9086	3.9657	2.3957	2.7881	3.6454	1.8301	3.1071
DJ01168	13.7322	7.12	10.5235	2.9607	2.1262	2.3604	3.451	1.4093	2.8105
DJ01170	13.1875	15.7442	19.118	18.2419	21.208	22.3069	18.8914	17.8506	16.9283
DJ01171	20.7691	55.1403	39.607	73.0298	83.7193	88.9946	82.9228	77.2665	76.0301
DJ01172	53.7305	37.1436	41.1988	5.6746	5.7592	4.1185	4.9521	4.9024	4.8066
DJ01173	112.827	137.249	114.027	129.052	167.504	205.958	159.838	184.164	170.205
DJ01175	20.093	14.4152	18.3343	6.1612	4.4408	7.3492	6.5255	4.3684	6.5983
DJ01176	3.5742	4.5597	4.9917	4.1605	2.5756	3.6434	3.9799	2.9953	3.8734
DJ01178	3.9569	3.6617	5.4231	4.0911	4.07	4.8379	4.7341	3.1137	4.2776
DJ01179	9.3789	19.2084	8.8007	2.8171	0.8365	1.9341	1.5742	1.1162	2.335
DJ01180	41.6304	88.6417	54.4053	44.3544	40.0207	43.7733	45.5293	44.8722	46.7918
DJ01181	7.2689	6.4628	13.6021	1.8909	1.6786	2.9717	2.854	1.7588	2.2551
DJ01182	53.6039	70.2289	58.9734	173.221	143.208	174.867	109.831	124.5	130.217
DJ01183	191.57	84.7179	145.552	11.6567	4.792	6.8455	10.0362	9.785	10.6095
DJ01185	7.5589	8.3939	5.5812	26.3558	34.9928	41.4084	26.9249	43.6194	22.5188
DJ01186	11.547	6.1949	9.5055	20.3548	20.0065	18.9011	15.3249	16.016	14.6973
DJ01187	20.3635	15.7319	20.4508	23.9911	23.4473	23.943	26.3721	21.8032	24.6056
DJ01188	19.1714	29.5491	28.3788	28.1971	52.1916	34.3639	49.427	42.512	41.4945
DJ01190	0.8497	7.4883	1.7906	13.6599	7.9548	8.0172	9.5076	2.2821	5.5385
DJ01191	0	0	0.0913	0.0478	0	0	0	0	0
DJ01192	0	0.2738	0	0	0	0	0	0	0
DJ01193	0.5162	1.5221	1.1495	0.3209	0.235	0.3396	0.6785	0.3675	0.41
DJ01194	6.8221	8.3844	17.1779	1.4271	1.1707	1.6918	1.5022	0.8892	1.1088
DJ01195	2.228	1.5329	1.9911	0.4847	0.355	0.667	0.5922	0.3109	0.7928
DJ01196	2.7589	1.1904	2.181	2.6513	4.1803	3.0401	3.3742	2.4968	2.9551
DJ01199	1.3948	1.7771	1.9863	0.2248	0	0.2379	0.1056	0.206	0.1149
DJ01200	54.367	62.3203	83.9689	68.707	82.1356	83.9288	99.6272	84.1236	89.2424
DJ01202	32.2169	40.884	28.9613	110.527	73.0833	85.0513	87.853	62.0068	79.186
DJ01203	11.0522	17.2982	9.7433	21.1394	17.9031	17.7308	14.9939	12.2692	13.6885
DJ01204	0	0.3472	0	160.384	179.927	119.864	153.33	170.861	154.158
DJ01206	2.3902	2.4867	1.382	7.4485	8.992	7.2836	8.2862	9.0461	9.1933
DJ01207	11.6686	8.0772	12.0779	13.3678	13.5788	14.0431	15.3575	13.8971	14.2531
DJ01208	13.1544	12.0134	17.5316	12.8428	13.5856	14.0889	13.0891	11.7902	12.625
DJ01209	2.2329	2.3239	3.9977	1.3754	1.6504	1.9514	1.4576	1.0726	1.5556
DJ01217	1.3962	1.6919	1.914	3.07	4.9821	4.7201	4.7985	3.9381	4.4267
DJ01219	0	0.0274	0	0.039	0.0856	0.0412	0	0.0357	0
DJ01220	0.5313	0.5828	1.2243	1.8093	2.0246	2.6864	2.6451	1.2434	2.1836
DJ01222	0.051	0.156	0	0	0	0.0294	0	0.0254	0.1702
DJ01223	185.651	121.535	215.026	90.2594	86.3641	91.0578	87.42	86.4157	76.2415
DJ01225	18.8573	34.1368	49.4673	34.8206	36.9664	41.8542	36.7098	24.6714	32.8473
DJ01226	23.0033	17.8664	22.3738	17.3497	18.8521	19.7691	22.8433	18.0606	21.5938
DJ01233	36.0605	23.9222	29.3433	29.2541	26.4901	25.0521	29.7112	27.2009	31.0612
DJ01236	16.6222	23.5958	26.282	38.3613	47.3903	44.077	42.2743	36.2203	40.7516
DJ01237	0	0	0.0886	0	0	0	0	0	0
DJ01240	0	0.5112	0.1895	0.1323	0.0484	0.07	0.0621	0	0.0676
DJ01245	39.1513	42.2302	32.0494	42.055	45.0508	39.2933	41.6859	35.5975	40.0096
DJ01247	14.2082	15.7758	14.9099	1.5709	2.0413	3.0036	3.9528	3.2503	4.5069
DJ01248	2.8164	2.4817	3.3512	3.0169	2.7406	2.5001	2.8353	2.3357	2.6299
DJ01249	2.8325	2.5863	3.1069	2.3965	3.6984	3.1706	4.1023	1.7253	2.2749
DJ01250	4.5474	4.7881	4.9038	5.0867	6.2206	5.5815	4.5173	2.9932	5.3431
DJ01251	32.5898	25.1499	24.2744	27.5983	34.9621	27.0141	29.0473	27.8063	31.3671
DJ01252	4.5873	4.4437	4.8762	1.0095	0.3208	0.6451	1.4678	0.349	0.5646
DJ01253	48.5372	54.0274	85.5011	88.9037	99.4455	111.712	95.63	93.5433	97.7687
DJ01254	0	0	0	0	0.0666	0	0	0	0
DJ01255	4.4073	11.1744	3.9311	57.212	99.2838	80.3026	88.4619	114.582	105.66
DJ01256	0	0	0	0.1488	0	0.0787	0.1398	0.1363	0.1521
DJ01257	4.8066	9.5052	3.8284	0.4696	0	0.0663	0.0883	0.0287	0
DJ01258	563.966	286.533	806.314	64.408	68.2422	137.823	123.234	116.583	132.121
DJ01260	2.5753	2.2012	3.4137	3.2647	2.8273	3.4087	6.2814	4.4264	5.2091
DJ01261	6.4584	6.7325	11.2874	14.3172	13.3316	15.4917	16.2565	16.4348	15.7788
DJ01263	4.0269	6.1292	4.6913	3.7912	3.2803	3.6177	3.7846	2.5559	3.4942
DJ01264	34.7009	32.5144	32.6713	44.5699	53.0507	49.5808	37.8122	42.6721	42.8353
DJ01269	1.7142	0.7743	1.1336	0.5933	0.6208	0.9868	0.6373	0.7766	0.7798
DJ01270	18.6	14.9436	15.6193	19.3838	12.7527	15.0582	21.353	15.0371	18.4822
DJ01271	4.0662	7.0676	6.0714	3.4455	2.6599	4.386	3.3475	2.3038	3.1653
DJ01273	0	0	0	0	0.0753	0	0	0.0942	0
DJ01277	1.2067	0.615	0.209	0	0	0	0	0	0.1118
DJ01280	59.4221	40.6815	57.8414	20.4557	23.8211	23.8159	26.3373	28.8644	28.2304
DJ01290	1.4736	0.6355	0.7068	0.781	0.7827	0.7396	1.3134	0.7532	1.0505
DJ01294	15.112	7.3464	13.5694	4.4689	4.1497	5.9969	5.9248	5.5571	6.3632
DJ01295	1.9046	0.6933	3.4872	0.6906	1.662	2.0885	2.1326	1.9888	0.8069
DJ01297	4.1407	2.2898	3.8757	3.5779	4.5156	4.0912	5.5241	4.9761	4.2454
DJ01299	4.5746	3.2715	5.6082	6.0771	6.1305	5.9224	6.444	5.2531	5.0403
DJ01301	0.9022	0.9196	1.9272	0.8179	0.4792	0.8945	0.4356	0.3247	0.5017
DJ01303	0	0	0	0	0	0.1093	0.1942	0.0947	0
DJ01304	0	0	0	0.1912	0.14	0	0	0	0
DJ01305	1.6619	0.847	0.6716	0.2009	0.3678	0.1063	0.0944	0.1841	0.1027
DJ01315	2.2826	1.6452	2.7109	1.1706	1.4029	1.3141	1.4002	0.5525	0.7978
DJ01322	3.4993	4.9178	7.0157	6.998	9.3777	9.5638	9.5037	8.2794	8.8048
DJ01324	30.4109	50.608	35.4068	2000.89	1245.73	833.973	1644.1	2018.15	1958.72
DJ01325	1.6568	0.8232	3.4434	6.2178	1.122	1.0492	18.6315	30.1376	32.8871
DJ01326	6.5302	12.2027	6.3147	1.6772	1.0116	1.5664	1.9472	0.3616	1.3112
DJ01327	1.6391	22.9375	2.6023	35.3145	33.6637	35.2285	18.8519	21.6023	20.2025
DJ01328	7.369	4.2317	7.8775	2.5314	4.0732	2.2327	1.3337	1.5112	1.2939
DJ01330	2.8106	8.4255	3.2754	0.4586	0.5278	0.5316	0.7594	0.4202	1.1163
DJ01331	63.406	30.1227	75.2182	36.1829	35.9488	30.5723	46.7083	60.7503	37.0941
DJ01334	3.4346	11.1588	1.6061	22.6974	21.2755	26.0008	6.3203	27.644	5.5382
DJ01335	11.0176	25.2672	10.4161	34.3331	19.2718	53.6979	22.6119	38.8899	10.4096
DJ01341	0	0	0	47.2985	78.731	41.9319	39.7041	48.5791	37.2137
DJ01343	24.5621	13.4408	22.1271	40.1264	40.4227	36.9268	41.7079	47.533	44.5083
DJ01344	0.0692	0.0529	0.1439	13.7417	15.4414	11.1973	5.2719	8.1412	8.5057
DJ01346	6.4353	10.3501	10.5956	1.2728	0.4661	0.5774	0.5126	0.833	0.9294
DJ01347	91.0361	80.2167	73.9707	87.8628	29.6293	56.3108	41.8314	53.8161	52.2336
DJ01348	23.9685	22.9096	20.3548	26.3495	26.5828	20.3959	22.9458	26.7066	24.2181
DJ01349	0	0	0	0.9741	0.5875	0.6065	0.3231	2.5726	1.4058
DJ01352	1.3286	2.9688	3.3453	4.6136	4.9261	4.1184	4.9628	5.5516	5.6824
DJ01353	0.2776	0.193	0.2885	0.5217	0.5631	0.6103	0.6451	0.8805	0.8982
DJ01356	0.5485	3.3542	0.5428	0.0852	0.0208	0.3909	0.0801	0.0521	0.029
DJ01361	0.0372	0.0427	0.0774	1.4582	0.8455	2.4009	1.5798	3.6373	2.3396
DJ01364	0	0.0274	0	0	0	0	0	0.0358	0
DJ01366	0.5522	1.6415	0.8288	0.7008	0.5132	0.6004	0.7527	0.5504	0.9893
DJ01367	14.4663	11.8515	21.0138	4.8225	2.2721	5.8505	3.7636	6.0209	5.939
DJ01368	5.926	3.3887	5.8187	3.1978	2.3049	3.5995	3.2438	2.2789	2.6982
DJ01370	0.5776	0.3532	1.1204	0.1676	0.5216	0.6207	0.433	0.6141	0.2569
DJ01376	59.5232	36.0768	56.9789	30.09	30.775	38.6323	29.5058	28.6041	32.8232
DJ01377	151.796	133.442	290.737	112.775	70.3258	150.915	80.6283	85.2689	73.5338
DJ01378	0.1065	0.0407	0.1107	0	0	0	0	0	0
DJ01389	3.4288	3.1588	3.4412	1.2433	0.6538	1.3159	0.8389	0.701	0.7496
DJ01390	120.065	136.735	86.849	415.283	516.456	394.87	265.25	546.675	317.82
DJ01391	8.2072	15.5472	10.0985	7.6525	4.5269	7.0093	7.7681	6.2927	8.5
DJ01392	15.5913	10.5835	10.1515	69.9528	106.436	58.3977	101.589	157.339	91.6552
DJ01393	1.0304	7.4829	1.8738	0.7005	1.0262	1.7795	0.1317	0.5135	0.4297
DJ01394	23.385	8.3197	22.8694	7.8301	3.8964	6.8601	11.4078	13.079	9.9195
DJ01399	1.5006	1.2487	2.5857	1.7563	2.0127	2.0557	1.903	1.4389	1.4786
DJ01401	2.545	11.534	7.6191	9.7554	11.007	12.9766	9.1682	7.4288	8.423
DJ01403	16.6725	31.8425	10.9066	6.9573	6.2279	6.105	4.2472	5.3941	2.6139
DJ01405	1.1894	4.9918	0.9936	0.1268	0.0372	0.0537	0.0954	0.0697	0.0259
DJ01406	45.8738	341.698	99.0446	365.645	148.187	326.421	578.512	168.99	489.563
DJ01410	0.0734	0.1122	0.1525	0	0	0	0	0	0
DJ01416	8.6424	7.1149	15.396	9.608	13.3928	15.5274	14.2726	14.3887	12.2511
DJ01419	7.6234	12.0718	9.6875	6.4684	3.3666	5.8934	5.4778	3.4302	5.1834
DJ01420	6.031	5.5089	6.0744	6.4597	5.5935	6.3742	6.3238	4.9941	5.5374
DJ01421	2.9637	1.25	2.2302	0	0	0.2353	0.1045	0	0
DJ01422	3.5833	5.8648	10.8844	11.5938	12.92	15.0216	13.2441	11.5389	12.9249
DJ01423	5.4459	5.6815	7.9562	8.6423	10.3367	8.7415	9.956	8.8766	8.0867
DJ01424	7.1518	5.6783	6.2554	5.0463	4.1579	5.5001	5.4483	3.7156	4.7596
DJ01426	55.7614	45.195	42.8218	37.4693	30.4361	32.3681	34.8636	31.1933	34.3102
DJ01429	15.1923	6.416	11.9233	9.4189	10.1572	7.2169	11.7844	16.0428	15.1814
DJ01430	0.5132	0.4577	0.7778	0.9305	0.9541	1.305	0.5466	0.4902	0.9988
DJ01431	2.032	1.843	1.8968	0.8617	0.8506	1.0706	1.8309	1.3731	1.149
DJ01432	121.289	75.038	108.159	3.682	2.472	3.7348	5.9836	4.1469	4.7835
DJ01436	6.9793	8.2133	7.1323	2.2052	1.7997	2.8675	2.4573	2.3669	2.4797
DJ01438	4.1989	12.1856	10.2217	8.7546	8.9829	7.6994	8.3469	8.9905	8.1714
DJ01439	0.0469	0.1971	0.2192	0.2295	0.1867	0.3778	0.1438	0.0467	0.1564
DJ01440	203.396	198.639	171.19	195.61	182.29	169.989	191.208	156.501	181.485
DJ01441	0.2838	1.0035	0.8111	1.4666	2.431	2.4919	2.2126	2.2633	1.7755
DJ01442	2.166	2.3331	1.0231	37.1629	49.8871	50.6698	49.4196	55.7387	48.0633
DJ01445	0.4088	1.0625	0.085	1.3341	3.3221	2.1651	4.0956	3.0152	2.9094
DJ01449	0	0	0	0.3409	0	0	0.2136	0.3124	0.4647
DJ01452	19.0924	16.4601	19.7875	19.1841	18.8825	17.4377	19.5707	16.835	18.8202
DJ01453	6.6805	11.954	11.0047	18.5716	19.3581	20.7962	12.2934	12.4297	12.3817
DJ01454	0.7056	1.4142	1.1297	0.7469	0.3495	0.6368	1.4428	0.6273	1.2089
DJ01455	100.249	115.915	107.401	204.828	219.866	211.743	264.781	275.332	260.46
DJ01456	18.7299	15.0018	17.192	12.7004	8.807	11.0685	11.2502	10.4734	11.9888
DJ01457	3.8852	4.3957	3.9163	1.9441	3.405	2.6393	2.8995	2.0137	2.6355
DJ01460	60.5286	28.5317	37.6565	4.4144	7.6958	6.515	4.0318	4.5576	4.0679
DJ01462	0	0	0	0.1636	0	0.0866	2.6145	1.1246	1.0874
DJ01463	0	0	0	4.5173	64.3594	25.981	29.1569	21.867	20.3015
DJ01464	0.2828	0.1081	1.1754	0.3076	0.5632	0.5698	1.5177	0.5637	0.8648
DJ01466	44.37	32.1882	32.7461	25.0196	23.9877	26.1687	22.4489	19.2245	24.4693
DJ01468	1.1781	0.4788	0.8988	1.7195	1.8297	1.5281	1.2044	1.0702	1.3764
DJ01469	3.0695	1.769	3.6881	3.7825	4.4707	4.6523	3.9102	2.6531	3.6667
DJ01470	18.9853	10.9195	18.7894	6.0974	6.3385	7.0782	8.1334	6.8485	6.8364
DJ01475	2.8322	3.8971	3.9732	4.8524	5.1475	4.4022	5.8813	4.799	5.0983
DJ01480	0.8547	0.8349	0.4935	1.808	2.6483	3.7178	1.7962	1.6093	2.1651
DJ01485	17.8122	12.2362	14.5543	11.8912	14.5801	11.2936	12.5723	10.7011	12.4274
DJ01487	53.4752	44.2483	48.0892	34.1993	24.6966	29.6008	34.9943	32.9469	36.7583
DJ01488	20.3226	36.5312	43.0978	36.3323	27.1597	35.3167	37.1082	32.3964	35.3
DJ01492	2.0695	4.0816	3.3978	3.6019	4.7814	3.5264	4.1044	2.599	3.9583
DJ01494	9.0812	18.8629	12.3919	30.8332	37.7103	31.0505	28.1331	29.349	28.8679
DJ01495	0	0	0.079	0.0826	0.1816	0.2187	0.0777	0.1136	0.0422
DJ01496	17.6213	29.1928	29.0892	64.8721	88.7878	75.0099	62.0479	75.4242	70.6284
DJ01497	10.148	9.607	9.0994	8.4773	6.7887	7.1238	5.4062	5.1641	6.9281
DJ01498	2.4052	2.563	3.6608	3.6736	4.6649	4.6714	4.2472	3.8019	4.3228
DJ01500	5.4613	8.9462	26.0685	0.6528	1.291	2.2802	1.043	0.5384	0.7341
DJ01502	10.7724	26.7203	41.0656	21.2472	28.0288	27.3192	18.4032	19.1858	21.1531
DJ01504	0	0	0	0	0	0	0.1732	0	0
DJ01506	0.8691	1.7717	1.7789	8.5948	8.645	11.5532	9.2621	7.4815	8.142
DJ01509	64.5541	34.4128	53.2729	33.1248	32.9904	29.487	35.1346	33.9482	35.8201
DJ01514	0	0.0745	0	0	0	0	0	0	0
DJ01518	69.0712	69.546	116.624	17.0558	23.3235	19.2519	21.8337	17.497	19.4922
DJ01524	38.1126	34.0446	30.6637	17.7161	17.0552	15.3199	17.2075	14.9359	18.3441
DJ01527	13.1182	16.8536	7.3603	24.1453	22.2542	24.8094	20.0402	18.3951	21.0223
DJ01528	45.2298	38.883	40.7321	36.523	32.9915	35.2603	31.9018	27.9098	34.1771
DJ01533	58.8945	53.5073	50.0738	34.1401	21.4323	29.2687	28.6585	23.2988	25.4616
DJ01534	196.303	120.268	175.459	44.7593	50.2257	51.6441	50.7764	51.1963	60.5407
DJ01539	24.7351	16.3023	15.912	5.7321	2.9634	6.4953	6.2109	8.4653	7.3075
DJ01545	0	0	0	0	0.0526	0	0.0675	0	0
DJ01548	5.3993	1.5656	5.9977	0.2025	1.0383	1.5006	1.142	0.9279	1.6563
DJ01549	24.0173	31.4479	21.5475	26.0769	26.7263	22.4635	38.9331	36.9335	33.8226
DJ01550	0.0603	0.1152	0.2505	0.0328	0.072	0.1735	0.0616	0	0
DJ01551	7.4908	9.5768	12.8305	7.5585	8.6434	9.4276	9.7178	8.4705	9.278
DJ01552	2.0445	1.3779	1.901	0.7023	0.7073	0.9912	1.2926	0.9653	1.436
DJ01555	55.0957	40.9702	49.7388	46.6669	39.3791	41.6317	41.101	34.6356	37.4837
DJ01559	4.9606	20.0902	17.2195	66.9928	91.9511	73.7627	72.0237	56.1242	67.1355
DJ01561	35.451	45.906	41.1322	158.884	172.61	147.794	133.436	128.621	128.691
DJ01562	15.7383	12.5189	15.3602	26.4516	24.146	27.3645	27.4504	27.9115	27.9278
DJ01563	0	0.0614	0	0	0	0	0.0411	0	0
DJ01567	21.6941	22.832	18.7343	32.8417	32.8844	28.0815	30.9088	30.1137	32.1824
DJ01569	31.4881	32.9873	25.5835	29.0744	26.6855	29.0896	25.3775	23.3188	27.3777
DJ01570	21.5115	23.79	17.0715	24.0748	24.7447	22.8404	24.5902	21.2559	24.5422
DJ01580	5.6983	23.7843	21.4951	49.4655	58.2475	57.2763	49.8084	52.8215	46.7021
DJ01582	6.3842	17.1481	5.8502	16.2572	16.369	20.849	15.6049	20.4208	16.458
DJ01584	12.2996	17.4586	13.0765	12.6689	12.4698	11.5449	10.1349	8.6637	9.6028
DJ01586	45.5794	40.3019	42.4463	39.7011	40.8694	42.1782	34.0947	28.2238	33.7097
DJ01589	0.9026	0	0.7816	0.6546	0.1199	0.1732	1.2304	0.4498	1.0037
DJ01590	9.7094	9.2436	13.3128	18.3368	23.8873	23.5485	23.207	21.9989	22.0444
DJ01592	11.1515	17.6346	20.4499	26.4021	24.6503	29.4552	30.0659	26.916	31.0023
DJ01593	1.6704	2.4445	4.0173	6.3859	6.5403	6.0447	6.0015	6.4221	6.0505
DJ01597	0.6943	2.4769	1.0221	0.3776	0.2305	0.5329	1.0647	0.519	0.8365
DJ01600	17.3987	27.1994	20.6781	20.6571	15.0489	17.9681	18.3294	16.31	17.551
DJ01603	3.4633	4.251	8.7187	5.2797	8.3945	7.5539	7.1312	5.9803	5.4787
DJ01605	3.8432	7.31	2.1395	2.1899	2.661	1.2643	0.9823	1.7785	0.6614
DJ01611	10.7114	12.1233	12.3059	12.0404	11.3786	12.0244	12.4106	10.7654	11.6468
DJ01618	5.9727	6.0976	7.8084	6.8325	6.6927	5.9007	6.4212	6.0301	6.342
DJ01619	0	0.0639	0	0	0	0	0	0	0
DJ01625	19.6966	10.7813	18.9681	4.1217	3.7135	3.5315	2.7976	2.7875	3.1768
DJ01630	2.7724	6.3581	4.2729	0.7116	0.2234	0.8966	0.9872	0.2484	0.8314
DJ01634	0	0	0	0	0.024	0	0	0	0.0669
DJ01635	23.4155	24.0686	19.6908	21.7097	16.0724	16.9225	18.4141	13.788	18.4277
DJ01638	11.924	12.4601	14.9595	13.189	16.0462	15.844	15.8097	13.0503	15.4885
DJ01640	0.2059	0.2099	0.8558	0.5972	0.7108	1.2643	1.0524	0.6841	0.3816
DJ01642	12.6693	24.2699	22.9361	25.556	27.1024	25.5273	32.9924	26.7723	30.1191
DJ01644	0.0908	0.2431	0.2832	0.2965	0.1086	0.2092	0.0929	0	0.1515
DJ01650	0.4133	2.4485	2.6305	0	0.1646	0.2379	0.2113	0.2575	0.2872
DJ01652	11.8982	17.4787	13.175	13.886	14.625	15.92	12.2968	12.5722	10.6043
DJ01654	0.1679	0	0	0	0.0669	0	0	0	0
DJ01657	8.2611	9.8405	10.9073	11.9718	13.0283	12.7364	13.0155	11.3925	12.3958
DJ01659	41.5252	43.1596	34.6705	46.9765	38.5502	44.9711	43.8278	40.4065	41.8893
DJ01661	7.1174	16.9142	21.7063	23.0589	26.1339	26.544	25.5938	22.5473	23.4694
DJ01663	48.3907	17.255	40.2289	5.264	4.6163	5.095	5.1098	5.3627	6.585
DJ01664	1.0078	0.889	1.477	0.8715	0.6177	0.9521	0.819	0.747	0.661
DJ01665	0	0	0.0448	0.0469	0.0344	0.0497	0	0	0
DJ01673	6.3857	5.1047	7.2046	5.5572	5.0876	5.5878	5.148	4.2918	4.139
DJ01674	0.0415	0	0.0431	0	0.0331	0.0478	0	0	0.0462
DJ01675	0.549	0.9968	1.4977	2.0904	1.531	2.1335	1.4032	1.3681	1.2211
DJ01676	2.355	1.6709	4.3028	2.6958	3.8752	3.6331	3.0685	2.4701	3.0297
DJ01677	1.3836	3.1731	6.6008	1.2999	4.4094	9.341	3.7934	3.6358	2.6576
DJ01678	156.004	105.508	125.177	3.1351	1.5733	4.916	5.9474	2.8726	6.3506
DJ01680	1.1849	0.7953	1.2614	0.6916	0.4375	0.6655	0.8568	0.4609	0.7713
DJ01681	0.1791	0	0.0931	1.9482	1.7122	1.6496	0.2746	0.4463	1.7924
DJ01684	28.1583	24.0407	31.8254	25.2626	25.9805	24.5661	24.4343	22.9547	22.7586
DJ01692	168.937	121.661	161.607	33.7025	32.8849	56.9351	27.3405	32.7921	33.4433
DJ01694	32.8629	28.1815	37.989	41.1067	42.4928	46.6985	38.0814	35.5173	33.8919
DJ01701	4.7683	11.6541	21.9836	11.3237	15.7844	18.5579	17.4392	15.3961	13.8911
DJ01703	0.8864	1.0164	1.3488	5.4411	3.178	3.572	11.2627	12.527	13.0256
DJ01706	1.1397	0.4356	0.423	280.004	255.988	225.131	349.2	268.733	317.745
DJ01707	1.249	1.8032	1.4489	30.4279	37.5095	47.5505	38.8711	41.6852	44.7129
DJ01708	1.0441	1.8969	1.3371	30.0421	32.4845	40.5555	38.2205	39.5075	43.4905
DJ01709	20.6551	28.8821	22.7843	50.4141	40.2597	40.6834	53.1515	40.2375	47.1945
DJ01710	320.387	271.756	252.982	78.368	31.2487	48.7922	63.4494	55.6302	76.2369
DJ01711	0.4359	0.5236	0.5823	0.4741	1.1906	0.6452	1.2731	1.4275	1.6618
DJ01712	154.165	89.7442	136.286	88.0914	96.3987	93.1907	104.289	90.3009	94.8371
DJ01716	0.0369	0	0	16.9995	22.3108	18.9711	21.6037	13.9193	20.1719
DJ01717	0.5223	0.3194	0.2171	0.9091	1.6646	0.3608	0.534	0.9372	0.4647
DJ01720	0	0	0	0	0.0666	0	0	0	0
DJ01726	0	0	0	9.1544	17.7112	13.9337	10.2022	9.7242	9.731
DJ01731	0.0372	0.1708	0.0387	177.62	224.163	224.526	186.914	198.343	248.949
DJ01734	0	0	0	1.8106	2.9061	2.0387	1.1585	0.4942	0.9058
DJ01735	0	0	0	0.0666	0	0	0	0	0
DJ01738	40.137	1098.23	67.0357	9.6871	16.9055	64.4129	5.5321	1.5289	6.444
DJ01741	116.757	227.707	98.8679	220.975	183.435	214.277	173.186	162.078	183.65
DJ01743	10.2272	7.3167	9.2334	3.3084	2.6369	2.9524	3.475	3.6555	3.0837
DJ01744	2.8137	3.8972	4.1109	1.9395	2.1529	2.3736	1.6803	2.027	1.8898
DJ01745	16.709	16.9065	15.8066	14.6331	12.5339	14.3631	15.5837	12.0445	15.9371
DJ01746	3.3646	10.0026	14.6849	9.6788	11.9438	12.7839	13.1857	10.7317	12.0978
DJ01748	13.4495	10.4053	16.7716	13.1539	15.9839	16.489	16.3725	14.8828	15.4412
DJ01751	0	0	0	0	0	0.0724	0.0643	0	0.0699
DJ01752	0.9558	1.0587	1.7636	1.6551	2.0359	2.6502	1.8746	1.361	1.8222
DJ01755	0	0	0	0	0.1696	0.0817	0.0725	0	0
DJ01757	0	0.1445	0	0	0	0	0	0	0
DJ01770	8.1183	9.3751	10.0158	8.9063	8.0643	8.5516	8.6527	7.5753	8.9126
DJ01774	6.3279	20.2309	8.0933	0.5295	0.2449	0.6784	0.6548	0.5618	1.1681
DJ01777	4.0309	5.8446	6.529	5.7847	5.1263	6.5584	6.1136	5.6588	6.2503
DJ01778	0.8305	1.3736	1.3808	1.5769	1.3775	1.8603	1.7367	1.332	1.696
DJ01791	51.4244	45.4045	47.5795	25.5295	24.5777	27.157	32.4127	33.3963	29.9719
DJ01792	0.1525	0.1166	0.1584	0	0	0.2341	0.1559	0.152	0.113
DJ01793	5.8505	19.1638	31.2091	23.6442	22.0348	23.0253	25.4834	22.6897	26.3791
DJ01794	1.1599	4.326	2.3194	0.9941	0.9801	0.9308	1.1499	0.6131	1.7394
DJ01795	27.1695	25.8135	20.9582	28.4896	30.0248	28.1638	32.2827	26.2768	33.0652
DJ01797	0.9343	1.3264	1.387	3.9685	2.1976	3.0735	2.3651	2.0842	2.3253
DJ01798	2.0018	2.2153	3.2293	3.9819	8.7187	5.8828	4.7947	4.8457	4.4734
DJ01802	4.7789	5.1448	4.7604	18.487	32.5545	19.9253	16.2756	17.4466	17.4209
DJ01803	1.8198	2.8244	2.3495	0.18	0	0.1905	0.0564	0.1099	0.2453
DJ01807	0.5293	0.238	0.4529	3.3867	3.299	3.943	5.4745	6.7028	6.7858
DJ01808	5.5561	3.8478	3.0869	18.7901	22.2207	32.1754	9.9543	19.6022	12.7548
DJ01810	1.2363	3.7803	4.3274	9.3431	12.9082	14.2341	17.8274	13.7493	11.5049
DJ01811	14.4206	11.5089	15.1053	12.8005	14.6142	15.1423	14.5067	12.6487	13.7271
DJ01814	0	0	0	0.3686	0.2699	0	0	0	0
DJ01818	11.7926	16.6593	7.5349	0.3034	0.127	0.3211	0.1629	0.0397	0.0443
DJ01819	0.8089	0.4033	0.6213	1.0712	0.9247	1.5793	1.1146	0.7712	1.0169
DJ01820	41.2322	30.4843	47.7752	56.5769	57.1631	53.1462	52.9508	51.1037	51.5708
DJ01821	2.1951	10.6275	2.8133	0.7163	0.5829	0.7161	0.8602	0.6199	2.0749
DJ01822	35.1732	22.3911	24.9357	26.1366	22.7441	22.7797	26.3042	24.7199	27.0287
DJ01825	28.9859	23.4913	31.4956	28.498	32.6571	28.7665	34.5762	27.422	31.2968
DJ01826	0	0	0	0.2479	0.1362	0.1968	0.0583	0.0568	0.1267
DJ01829	0.109	0	0	0.0593	0.0869	0.0628	0	0.1087	0
DJ01842	0	0	0	0.0495	0	0	0	0	0
DJ01851	27.0482	17.6737	21.3032	12.9309	9.1897	11.0767	9.8868	7.7817	10.8104
DJ01852	75.034	46.403	96.4957	40.5782	43.1886	50.6362	43.8339	34.7389	43.5938
DJ01853	9.1112	15.2361	20.3563	120.05	156.765	182.925	139.37	158.547	139.738
DJ01856	10.0328	10.935	11.2067	10.3402	11.7642	11.3997	14.9338	12.0895	14.1185
DJ01857	264.87	244.72	254.81	104.84	76.3387	95.7716	84.9997	74.1527	85.3501
DJ01859	0	0	0	0	0	0	0	0	0.1015
DJ01862	22.8063	21.2404	31.9193	41.45	39.5392	44.7502	42.5671	39.7408	42.0163
DJ01863	13.2151	18.1842	18.1903	5.1846	4.5567	8.0816	6.5558	4.4051	6.6011
DJ01864	0	0	0.4225	0	0	0	0	0	0
DJ01865	0.9426	0.2162	0.4408	0.4614	0.3379	0.5426	0.3373	0.4698	0.3669
DJ01868	8.3102	10.0585	5.2036	0.0579	0	0.0613	0.0545	0	0
DJ01870	4.3357	3.8292	6.4682	6.2171	6.7516	5.9563	6.8334	5.2874	6.173
DJ01871	70.6196	78.2236	58.5161	61.591	62.1691	73.605	63.8822	59.8207	59.9867
DJ01872	25.1312	20.0983	23.1388	18.5248	19.7284	18.9799	22.5661	22.1414	22.4944
DJ01874	0.0487	0.0745	0.3037	0	0.0776	0.0561	0.0498	0.0486	0.1625
DJ01875	0.0487	0	0.1519	0	0	0.1683	0	0	0.0542
DJ01876	15.04	32.4053	14.183	15.3126	3.6246	8.1961	19.2061	9.4427	16.5466
DJ01883	4.7519	6.0041	6.317	7.2369	7.0004	7.3087	7.2595	5.7552	6.6802
DJ01885	0.1492	0.7986	0	0.3247	0	0	0	0.2975	0.166
DJ01887	32.5906	45.2178	36.6227	37.4064	36.6992	37.6715	38.5215	37.3442	41.4264
DJ01890	145.897	58.3926	93.9316	4.6554	1.6532	8.6603	4.11	2.456	5.6244
DJ01891	5.5559	4.7917	5.5514	8.7556	7.3207	7.709	7.2819	5.3957	5.2278
DJ01893	4.6392	4.2373	5.0505	5.1558	5.3122	5.827	4.866	3.7033	4.221
DJ01894	11.8184	4.7582	12.1176	6.5138	5.5868	6.1687	5.7995	5.6544	8.5865
DJ01895	0.0368	0.0844	0.3824	46.1954	45.2386	52.284	59.9302	69.9108	71.0005
DJ01897	1.9971	1.0905	2.6485	0.9311	0.6819	0.9198	1.0306	0.7394	1.0787
DJ01899	0	0	0.0949	8.0433	11.2	10.405	8.2123	6.0051	6.9028
DJ01900	39.2452	36.9919	42.4554	56.1131	57.7194	54.4841	48.3239	45.9174	49.028
DJ01902	5.8422	7.2374	9.1336	10.8946	10.9299	15.3748	11.1986	10.3204	11.0503
DJ01903	3.5669	0.3588	1.6582	0.1021	0.0748	0.2161	0	0	0
DJ01906	0	0.0374	0	0.0533	0	0	0.0501	0	0
DJ01907	1453.84	3168.19	958.135	581.78	296.525	354.119	301.503	174.656	158.529
DJ01908	24.8115	11.2587	23.8414	12.2372	10.8641	14.9333	13.8839	10.9361	13.9501
DJ01912	16.5366	11.7023	14.7785	4.934	2.3339	3.7535	3.5261	2.9198	2.9423
DJ01913	10.663	6.679	10.5875	2.7936	2.2239	2.3461	2.1117	1.3633	1.2727
DJ01915	96.1445	81.5684	125.035	26.1248	23.3716	41.1057	33.3679	32.4524	30.6501
DJ01916	0.6364	0.8585	0.6224	0.3258	0.4175	0.1724	0.3827	0.0746	0.1665
DJ01918	49.6156	48.9789	41.8156	20.314	14.5668	19.6117	16.2954	42.6004	19.8108
DJ01920	440.088	397.071	309.436	699.851	508.147	789.764	430.963	961.491	447.456
DJ01921	38.8702	47.4904	37.962	55.7542	45.0003	58.7741	42.7624	48.6864	49.9578
DJ01922	23.2973	112.044	11.0382	21.459	8.4628	14.491	7.6654	14.7691	10.1248
DJ01925	15.9221	32.9875	27.2595	5.8337	11.0625	4.3557	7.1826	8.4945	8.2752
DJ01929	135.767	96.0925	126.246	70.449	78.3282	71.9598	70.0371	80.5721	72.0185
DJ01933	23.0307	52.9628	15.692	12.759	12.0309	10.1147	11.6996	12.8741	10.9838
DJ01935	17.8305	15.3208	23.7643	6.0817	2.7304	6.4189	6.1031	4.3605	5.9538
DJ01936	0.8021	4.0877	1.7781	4.4208	4.6863	5.3563	3.772	3.8908	3.9246
DJ01937	89.2908	68.1658	63.9811	90.4009	88.6827	89.8859	87.8117	70.982	80.9473
DJ01938	0.3959	0.3405	0.3085	0	0	0	0	0	0
DJ01940	1.6118	4.8054	0.9491	0.4091	0.1712	0.4949	0.1648	0.2142	0.239
DJ01942	6.3585	6.3592	5.7133	6.6568	5.2182	5.6145	5.3763	5.6229	5.4759
DJ01943	0.2395	0.3662	0.2489	1.6938	2.5765	0.6895	4.0408	4.1784	3.5962
DJ01945	21.5234	22.1885	23.7276	17.8758	15.9622	18.8517	17.0736	13.5603	15.5925
DJ01946	0.1445	0.0921	0.1752	0.1572	0.0768	0.1387	0.1724	0.2161	0.1875
DJ01947	2.1532	7.2013	7.3838	7.788	6.4759	8.181	8.3648	6.2239	7.4826
DJ01948	3.5078	4.3125	5.8999	1.7702	2.1896	3.1227	2.1812	1.622	2.3726
DJ01953	1.5048	2.6293	1.4041	3.9419	4.3796	5.1976	3.8302	4.3771	3.3467
DJ01956	50.4046	36.1913	39.1351	2.1649	1.3112	5.8166	1.2912	1.6785	1.8727
DJ01957	1.6243	2.7862	1.8526	8.2742	7.291	7.3436	5.5081	6.081	7.4012
DJ01958	0.5331	1.3338	0.2518	0.7381	0.2317	0.0558	2.5765	7.1011	2.4253
DJ01964	0.658	0.1324	0.108	0.7534	0.4415	0.8373	0.4957	0.5523	0.3466
DJ01965	1.5646	7.9517	1.927	0.3467	0.0923	0.367	0.4147	0.1733	0.6444
DJ01966	28.4153	60.6689	37.073	92.7314	366.113	136.295	97.0885	68.0409	80.7378
DJ01968	0.0812	0.4964	0.253	0	0	0	0	0	0
DJ01969	9.1561	16.0873	6.3687	7.952	5.0887	7.3964	6.1145	6.3295	6.1585
DJ01972	14.2295	7.4287	12.5902	7.1389	7.139	6.9021	6.7092	6.9815	5.9647
DJ01974	7.0151	6.1076	6.3787	10.9168	7.9178	7.8526	6.2753	4.8557	5.0924
DJ01975	12.526	10.4552	11.9583	6.8345	6.2492	6.6552	8.3839	7.6862	8.5313
DJ01976	0	0.0517	0	0	0	0	0	0	0
DJ01980	75.5086	51.202	57.515	122.945	81.4733	85.5989	118.021	62.7025	86.5559
DJ01982	0	0	0	0	0	0	0.0291	0	0
DJ01983	15.1677	26.3091	15.4853	12.1576	12.4377	10.3148	6.1663	17.5054	7.7925
DJ01984	1.8615	6.0217	5.3349	3.0694	4.4337	3.7677	4.0866	3.1249	3.2685
DJ01986	54.1088	38.9815	54.3056	60.0959	62.3237	65.0646	70.3159	84.0206	61.4708
DJ01988	28.3697	30.761	37.8169	36.501	41.8019	36.6437	32.7702	31.1049	32.0198
DJ01991	15.0723	7.012	14.7676	11.0554	12.0769	12.3459	12.6792	10.2586	12.4511
DJ01992	35.469	21.8796	40.2495	4.6556	5.1786	5.944	6.3443	5.199	5.8599
DJ01996	7.8126	12.8755	8.9358	9.4368	3.3345	4.7605	9.1022	5.9668	7.5315
DJ01997	0	0	0	0	0	0	0	0.0413	0
DJ02000	3.558	5.4399	4.5785	1.3341	0.7841	1.4294	1.1145	0.8602	1.1281
DJ02003	14.9061	19.1325	20.8153	25.0048	28.8173	26.8085	21.9996	20.3257	22.275
DJ02004	0.1334	0.051	0	0.0725	0.2656	0.1536	0.0682	0	0.0742
DJ02007	4.0789	7.358	8.1633	14.5788	23.2808	24.4752	16.5032	24.759	15.9595
DJ02008	0	0.0757	0	0	0	0	0	0	0
DJ02009	57.0458	77.9994	48.3706	87.6934	73.2967	88.0111	73.4489	105.861	69.6734
DJ02010	26.6788	29.1545	30.3802	30.8114	33.0068	28.9918	34.3334	29.8719	34.8632
DJ02011	4.1466	6.8927	3.7579	0.8917	0.4994	1.1658	0.9859	0.3845	1.126
DJ02013	0.9585	1.1857	1.9197	2.8627	3.8045	3.672	4.4898	4.0127	3.7404
DJ02014	2.6203	2.7101	1.4416	0.2515	0.3684	0.0887	0	0.1536	0
DJ02015	5.0668	20.9574	8.18	4.5275	0.7569	4.1149	2.59	1.9389	2.9682
DJ02016	3.5608	3.4561	5.9455	3.5689	4.112	4.5605	3.9676	3.4296	3.9153
DJ02017	6.2341	3.5938	5.0977	11.2284	4.1526	1.765	36.359	65.3972	22.3888
DJ02018	78.967	65.1334	67.7072	81.9706	72.4327	79.5803	78.1087	81.672	78.8066
DJ02019	0.7042	2.749	0.9965	0.3586	0.2984	0.3105	0.1532	0.1045	0.3499
DJ02022	0	0	0	0.0469	0.0344	0	0.0441	0.043	0.0959
DJ02023	0.1137	0.1521	0.1772	0.371	0.3849	0.5235	0.523	0.5665	0.2844
DJ02024	2.336	2.3455	3.8043	4.5134	7.8335	7.547	6.9863	5.6299	5.5445
DJ02025	17.7687	24.0492	14.3783	6.4958	6.7302	7.7138	5.5588	3.968	3.9411
DJ02026	21.7929	25.2757	22.0323	27.8649	28.7758	30.6953	28.2019	32.7596	27.3681
DJ02027	3.8324	2.9297	6.9296	3.0016	3.664	6.5306	3.7613	4.2019	3.4947
DJ02028	0.0432	0.2313	0.0449	0.5173	0.31	0.1991	0.8839	0.4309	0.7211
DJ02029	1.5823	1.3026	2.7193	41.7057	34.7151	47.9261	64.641	70.1199	75.2539
DJ02031	12.074	25.1922	8.3292	6.8864	7.0367	10.6687	11.2214	9.1341	9.8217
DJ02032	0.3276	0.5008	0.3782	3.88	3.0447	4.0229	3.9441	3.664	4.7354
DJ02034	18.2125	27.383	51.4768	21.7436	19.7784	35.5433	26.229	25.3465	21.6397
DJ02035	0.3565	1.4307	0.4631	0.5817	0.2485	0.2052	0.5011	1.5545	0.5451
DJ02038	10.3715	27.1941	10.8449	15.5351	15.7798	13.8015	13.609	10.1445	12.4319
DJ02039	2.4475	6.216	3.9096	2.1343	1.5471	2.9111	3.5154	2.5403	3.6214
DJ02042	11.9482	16.4748	10.7366	70.2273	133.321	80.9352	153.384	162.402	153.91
DJ02043	3.6809	3.242	3.9914	4.9906	6.4602	7.7697	7.1171	5.3438	6.1696
DJ02044	201.488	98.5764	174.565	115.095	134.524	126.879	150.479	142.881	138.687
DJ02045	80.0706	172.327	71.5453	25.5284	16.5223	28.0239	29.4566	13.944	30.1444
DJ02047	81.0317	84.9311	82.4121	101.093	100.53	96.5397	82.4695	77.3267	79.4027
DJ02048	0.5954	0.9293	1.3148	0.5127	0.1976	0.3142	0.0254	0.0742	0.2483
DJ02049	1.645	0.6657	0.905	161.154	254.948	181.265	190.924	192.897	199.609
DJ02050	0.1487	0.0568	0.2317	0	0.0592	0.0856	0	0	0
DJ02051	0.1446	0	1.5032	0.3147	0.1152	0	0.4436	0.2884	1.6086
DJ02053	2.3032	2.1771	2.5026	2.0064	2.0786	2.3437	1.7391	1.6574	1.913
DJ02054	0.411	0.3142	0.5339	0	0.1637	0	0.1051	0.3073	0
DJ02056	8.1928	9.1857	10.8651	1.2732	1.4298	0.8984	0.4387	0.7	0.6508
DJ02058	4.1404	7.8733	4.5715	148.632	186.338	121.861	146.828	193.914	161.785
DJ02060	5.1452	11.5656	12.7303	4.3976	13.8594	7.0524	9.7687	6.6547	9.1956
DJ02061	5.0111	3.8505	4.8047	3.6247	4.2394	4.3421	4.0667	4.2481	4.8832
DJ02063	4.9186	3.76	6.3213	6.8137	6.4939	7.6972	7.9839	6.3033	7.3004
DJ02065	13.3914	20.119	15.658	23.0044	26.4716	24.674	23.1063	20.9577	21.9671
DJ02066	33.9808	31.0818	44.4753	10.3549	8.0543	9.3032	9.4298	8.679	8.9444
DJ02067	36.3244	49.9482	30.7396	2.5274	0.3386	1.0439	0.5504	0.1412	0.3151
DJ02068	12.6331	17.3167	12.8639	6.6343	2.7766	4.7231	5.7153	4.1611	5.2884
DJ02069	2.8425	1.1143	4.6959	0.0793	0.1161	0.0839	0	0	0.0811
DJ02070	13.803	8.8865	16.2901	8.7367	10.397	9.5636	9.522	7.6298	9.2935
DJ02071	66.1226	39.7602	53.9838	17.3539	11.9639	14.7374	15.2241	8.4951	14.2341
DJ02072	20.0717	10.3444	15.0287	4.4536	2.0757	3.1527	3.6691	2.4113	3.0451
DJ02073	16.2099	16.9226	15.9544	35.7327	37.3787	31.9007	25.1133	28.6841	27.3172
DJ02075	24.3429	49.6778	31.8192	41.4278	46.5004	56.5715	43.1671	44.5839	41.4415
DJ02076	17.2744	15.1674	14.8224	1.3959	1.6122	1.2502	1.8165	1.8202	1.5917
DJ02077	2.6863	5.2919	2.8989	0.1124	0.0823	0.4758	0.845	0	0.4596
DJ02078	16.1439	20.2926	26.5342	40.8983	34.5579	43.2047	37.0333	43.954	38.6767
DJ02079	66.7221	79.2403	79.4894	24.0102	19.0212	17.8401	18.7825	14.2465	17.7583
DJ02080	1.545	1.2568	1.3791	1.0989	0.9311	1.0491	1.0733	0.612	0.837
DJ02081	0.158	0.1812	0	113.366	158.379	136.455	138.69	151.205	148.137
DJ02082	4.8123	3.0881	4.2708	16.0869	11.1104	9.0998	11.4915	6.9674	6.8359
DJ02083	9.7207	6.4995	10.2166	5.0009	4.104	5.4845	5.9174	3.2849	5.3895
DJ02084	0.3001	0.1529	0.3638	0.1088	0.3586	0.1152	0.2045	0.1994	0.0556
DJ02086	8.3644	7.211	8.2708	6.8943	6.6934	6.6607	6.2909	6.06	6.9249
DJ02091	8.3985	13.4669	17.4975	23.0405	25.6878	21.4622	22.1142	21.9282	21.8226
DJ02092	0.2612	0.1426	0.504	222.942	130.407	189.703	242.669	300.485	382.836
DJ02094	6.9582	23.0793	9.9199	0.4379	0.2291	0.5297	0.4703	0.172	0.6395
DJ02095	0.0739	0.3954	0.1344	0.2612	0.3826	0.1701	0.2266	0.3866	0.4725
DJ02096	0	0.0468	0.0637	0.6663	0.5368	0.9168	0.6888	0.3663	0.7493
DJ02098	1.8598	2.6938	1.6953	0.213	0.2859	0.5259	0.4003	0.2602	0.3991
DJ02099	20.3294	17.8207	20.7525	15.1507	12.7136	12.9438	14.1269	11.6101	14.6895
DJ02100	3.5207	3.5677	5.9559	2.4939	1.5004	3.1109	3.0971	2.4483	3.1868
DJ02101	23.8895	19.4167	28.2956	14.373	9.9176	15.2462	13.7948	14.2793	15.7912
DJ02102	2.0758	1.5869	1.9033	34.934	15.2007	19.9638	26.0901	27.2323	26.5466
DJ02103	37.8239	26.4668	37.7734	33.3772	31.6398	30.2351	29.4605	26.9093	30.2528
DJ02104	6.9493	4.6429	7.3402	5.7991	6.7502	6.9052	6.2481	6.3574	7.1775
DJ02105	1.2388	1.0927	1.4854	2.2805	4.0998	4.9373	3.2149	2.8495	2.7552
DJ02106	66.1011	54.6404	73.908	20.9483	22.7786	20.676	24.2166	22.9628	23.4514
DJ02107	24.8799	35.1982	28.5392	54.5527	35.3868	39.8517	58.5051	53.3015	48.0542
DJ02108	1.8294	2.5819	4.0764	4.1141	4.0363	4.476	3.9384	3.8924	4.2058
DJ02109	46.7126	59.7822	60.0964	65.3445	69.0531	67.573	73.1973	59.9483	64.4353
DJ02110	5.9408	6.4932	8.1633	5.9284	5.2417	7.1793	4.2665	3.964	5.3507
DJ02111	9.689	16.9334	8.7839	1.3811	0.6655	1.6156	2.1518	0.5495	1.7091
DJ02112	9.1769	8.6125	8.8552	5.7935	4.2106	6.4622	4.9841	3.5526	5.8315
DJ02113	0.7447	0.2847	1.0061	1.8228	1.9284	3.4298	1.4466	1.3733	1.7392
DJ02117	10.8275	11.4866	13.7086	12.908	10.9151	10.6855	11.3177	9.8671	11.8195
DJ02120	1.5181	1.648	2.603	0.5285	0.3024	0.4719	0.6053	0.1816	0.4558
DJ02122	7.0032	4.4014	6.0406	3.4327	4.918	3.442	3.9052	4.1938	4.4019
DJ02125	1.7562	1.6045	1.1573	2.423	2.9691	1.3316	7.1817	4.8245	5.2874
DJ02126	5.6004	3.9157	3.4067	5.052	4.3531	6.9199	5.481	4.9014	5.8481
DJ02127	0.2779	0.5665	0.6738	0.3023	0.1476	0.5333	0.5682	0.1847	0.5151
DJ02128	60.8158	57.0569	55.6972	146.791	213.348	164.149	183.695	198.946	195.034
DJ02129	23.6083	32.7462	20.0008	39.6874	33.9924	41.3513	30.1256	25.1756	34.5829
DJ02130	8.7401	21.896	8.9213	0.8011	0.6639	0.6694	0.733	0.4636	1.3361
DJ02131	4.4924	1.2157	1.983	165.159	206.863	151.373	86.7329	103.067	81.7887
DJ02132	20.0267	131.856	96.2883	85.5559	102.288	104.79	102.129	80.5955	101.368
DJ02133	0.8413	3.5559	0.9256	0.4576	0.138	0.2849	0.3288	0.4193	0.6604
DJ02134	142.572	65.276	78.0752	3.6262	1.6344	2.7556	4.8935	6.3897	6.1784
DJ02135	1.3536	1.178	2.3155	0.6796	0.73	0.6234	0.7025	0.5604	0.6716
DJ02136	16.5957	16.1403	17.6526	13.3022	13.75	21.5352	20.261	24.7373	17.3834
DJ02140	1.8828	1.9825	2.1781	2.9756	2.3492	2.6995	1.8159	1.6642	1.9753
DJ02141	0.3113	0.1904	0.5823	0	0.0496	0	0	0.0621	0.0692
DJ02142	54.8463	64.638	72.8038	91.5533	103.78	99.3082	83.7059	88.5743	86.6951
DJ02143	24.0099	34.8556	22.3442	20.3708	10.9766	14.7077	32.3748	25.1982	30.4746
DJ02144	39.6027	106.011	61.7992	20.4497	15.0036	39.1834	32.5408	33.4625	37.498
DJ02146	50.0912	33.831	86.0815	26.804	34.8715	30.9831	29.0022	19.3894	24.1563
DJ02147	9.2593	5.9735	9.1384	4.9296	4.0593	3.8075	4.9584	4.2972	3.9226
DJ02148	10.8738	14.5849	17.938	16.4304	11.4682	15.5598	11.494	10.4988	12.0922
DJ02150	76.5537	78.0676	64.2639	62.5259	71.8642	66.296	67.5271	91.7267	84.2285
DJ02151	5.6866	7.8544	3.9619	4.8503	3.5524	5.8033	3.5674	2.834	4.0242
DJ02152	10.1838	14.8859	11.3452	11.8762	5.1476	10.0149	11.0881	5.7978	10.2102
DJ02154	0.3065	0.0879	0.2986	0.4168	0.4273	0.5293	0.5092	0.3628	0.4473
DJ02155	23.5495	27.653	30.803	32.5634	31.4338	29.6434	31.1721	27.7644	31.7905
DJ02156	18.9618	16.1795	16.8429	8.8156	7.8357	7.8813	6.6762	6.9012	9.012
DJ02157	178.759	89.8272	143.708	64.994	76.9085	75.2	76.7231	73.0071	78.8812
DJ02159	7.7182	2.4137	7.7289	0.229	0.3354	0.3231	0.2152	0	0.3901
DJ02160	20.1918	23.1721	21.4493	13.2528	8.8847	11.2329	11.1029	10.4258	11.497
DJ02161	60.5989	88.6619	35.7411	32.2672	27.1123	30.5207	29.2706	32.7098	37.2358
DJ02162	2.0469	2.4619	1.8719	0.6828	0.5871	1.9168	1.0882	0.4625	0.5767
DJ02163	0.6213	0.5359	0.8443	0.6759	0.5585	0.5319	0.6189	0.4605	0.5669
DJ02164	0.1434	0.2741	0.2732	0.4941	0.3428	0.3578	0.3666	0.2144	0.1595
DJ02165	11.6334	9.9211	8.7479	3.116	2.5151	3.0962	1.9125	1.3985	1.8203
DJ02166	8.9325	17.126	15.0405	13.4062	15.0326	16.8844	15.871	12.4743	14.3954
DJ02167	42.6563	34.5234	48.2511	32.6754	38.0063	32.4216	30.5339	30.5451	32.2217
DJ02168	35.8912	33.0393	42.5579	23.5496	26.2947	24.6423	25.3353	25.953	26.1764
DJ02170	136.204	129.561	123.256	88.213	80.2408	81.5131	74.1111	62.4167	73.8465
DJ02171	50.7336	41.5411	41.5546	45.5034	48.431	46.1295	52.4941	43.6065	49.2485
DJ02172	28.6969	14.8477	28.4717	12.3656	11.9066	12.539	12.2714	10.9606	10.6079
DJ02173	32.2072	50.5348	28.0723	46.9407	48.4899	43.1004	46.3632	52.4189	53.4604
DJ02174	0.5786	0.2212	0.2004	23.3929	52.3211	33.7531	45.9412	53.8264	37.3188
DJ02175	0.3909	0.1494	0.2708	0.4252	0.7785	0.75	0.5328	0.8441	0.5795
DJ02176	35.7223	29.3649	42.7138	19.9342	19.9593	23.556	19.6354	16.4619	19.7076
DJ02177	1.8858	1.919	2.9394	2.3977	2.2731	2.6505	3.2548	2.2336	2.6962
DJ02179	7.0048	18.2982	5.9168	3.0561	1.7608	2.1565	2.8339	4.3311	3.1659
DJ02181	44.2957	33.7062	54.2845	179.042	245.604	238.628	249.881	321.813	231.422
DJ02182	1.4751	1.6153	2.8587	1.6914	2.8587	2.9837	1.9156	1.3114	1.8177
DJ02183	3.1501	6.3848	8.8595	10.5946	9.4174	10.5814	10.2523	8.613	9.4166
DJ02185	172.099	226.328	198.402	273.203	236.687	259.81	204.992	189.945	218.94
DJ02186	10.3021	6.1576	9.4622	115.623	80.4972	103.359	89.5974	80.577	93.5657
DJ02187	32.7388	31.172	44.6845	59.0282	73.0144	69.2283	60.0208	60.9537	59.7455
DJ02188	9.5739	5.1571	6.8635	3.2298	2.6713	2.6976	4.6047	2.9393	3.5938
DJ02189	91.8532	65.9833	70.8789	59.7449	49.8982	48.1625	60.3655	48.2766	55.4335
DJ02190	1.2031	1.3995	1.7394	2.5321	2.7296	2.8306	1.8716	1.5641	1.7741
DJ02191	0.1939	1.3338	0.7387	0.0703	0	0.0744	0	0.0644	0
DJ02192	1.7273	1.3952	2.8448	1.9144	1.5839	2.6266	2.7987	2.5012	2.8268
DJ02194	0.914	0.5842	0.7941	0.5705	0.7043	0.6728	0.5974	0.6273	0.5499
DJ02196	5.4468	25.4966	5.7337	0.5002	0.5072	4.1537	0.4701	0.0353	1.1406
DJ02197	1.2993	4.6618	2.5914	22.4313	16.7794	18.6027	17.5461	15.4986	21.6027
DJ02198	0	0	0	0	0.1144	0	0	0.1431	0.1596
DJ02199	7.1878	11.6971	14.2031	8.8852	9.501	7.8996	10.4657	8.087	9.0226
DJ02200	79.7503	118.305	61.3833	72.4434	46.9105	50.9717	63.7506	40.5331	56.6155
DJ02201	0.1917	0.521	0.9959	1.112	1.7476	1.4221	1.1539	1.1038	1.0183
DJ02203	87.8287	149.455	97.3174	169.003	146.786	156.195	139.605	110.525	139.077
DJ02204	22.5983	12.6097	28.9687	2.6915	1.7742	3.2286	3.5413	3.4527	3.2101
DJ02205	150.479	110.27	112.996	62.0732	66.4613	63.1587	64.2433	61.7941	67.571
DJ02206	6.2799	3.8163	5.591	3.0895	4.6098	3.8183	3.9314	2.5671	3.2956
DJ02207	0	0.0261	0	0	0	0	0	0	0
DJ02208	7.845	4.4473	4.1219	3.2601	2.9495	3.6536	1.6221	2.5479	1.6664
DJ02209	17.0487	19.9968	16.6852	11.9855	12.7112	32.2565	14.7239	18.6924	15.3086
DJ02210	36.8427	45.0833	41.4934	17.3599	16.1678	18.8279	19.5376	15.972	18.6231
DJ02211	2.8866	30.0774	12.5202	25.4615	20.6479	25.5042	25.1477	25.0186	25.8892
DJ02212	48.8668	28.3794	40.9341	13.5103	9.7332	31.3658	9.6179	11.1987	12.3812
DJ02213	16.5665	31.2121	17.3855	7.7191	3.5661	5.4991	5.3571	1.7138	4.0669
DJ02214	9.2028	11.8145	9.3917	11.7392	10.7021	11.7836	11.0325	11.0649	11.5189
DJ02215	4.9055	9.0001	4.4604	5.6031	2.4427	2.9652	7.3972	3.5449	5.4551
DJ02216	19.1484	47.2199	22.7071	156.732	132.97	165.719	114.107	132.116	129.785
DJ02218	0	0.0834	0.3402	1.187	2.2603	1.5076	1.1155	0.435	0.2427
DJ02219	43.4177	31.8161	38.8573	7.9053	6.4693	7.8763	5.2499	4.9707	5.9168
DJ02220	0.7485	1.3005	1.3436	0.8143	1.5181	1.8021	2.0871	1.3566	1.3621
DJ02221	68.5019	53.5216	107.787	89.1544	105.943	151.611	192.55	106.434	109.465
DJ02223	4.5495	1.9476	5.295	1.8476	1.8365	2.7937	2.6666	1.3906	1.7539
DJ02224	49.632	68.0688	32.8861	9.1142	8.946	8.0059	3.8181	2.3755	3.3881
DJ02225	322.479	327.091	261.259	243.248	187.457	179.395	197.474	168.607	199.823
DJ02226	29.0496	41.4399	30.9961	24.5468	21.4912	18.6645	18.0311	18.8724	19.325
DJ02227	0.7754	0.3705	0.8058	0.7381	0.1545	0.4464	0.0991	0.1932	0.3234
DJ02228	19.1352	40.5248	25.04	4.7798	3.689	4.2975	4.1057	2.1192	4.5185
DJ02229	23.4826	20.561	22.5032	21.4184	18.2144	17.8659	19.0716	15.9821	16.8723
DJ02233	1.2617	0.6275	1.4691	0.9426	1.4049	1.1377	1.3055	0.7121	0.6086
DJ02241	0.8064	0.5671	0.7709	0.4561	0.5654	1.1512	0.3957	0.1607	0.3946
DJ02244	0.3031	0.3347	1.4	1.9051	2.254	2.1715	1.8249	1.3428	1.573
DJ02247	9.2401	7.1875	18.8672	0.8817	1.2915	0.9332	0.8286	0.3232	0.1803
DJ02248	13.6448	7.1782	11.5874	0.0798	0.1169	0.4223	0	0.1462	0.2447
DJ02249	20.361	26.3704	25.4427	26.359	23.9977	24.7992	27.4817	22.1395	26.2913
DJ02250	0.2989	0.6601	0.4314	0.6503	0.4763	0.8604	0.5263	0.5462	0.6833
DJ02251	3.8246	7.2282	3.9744	4.1027	4.1898	5.2598	3.8557	3.3886	2.8945
DJ02252	12.5829	7.8956	16.0178	4.6767	2.6733	6.7609	3.484	3.7103	3.6148
DJ02253	7.6649	28.5939	5.9473	2.8905	1.547	3.177	1.2538	1.2224	1.1365
DJ02256	1.5509	1.5561	1.662	0.3163	0.1545	0.3348	0.3468	0.0483	0.2156
DJ02260	0	0	0	0	0	0	0.0236	0	0
DJ02263	13.7954	5.4613	9.3012	6.9674	5.0376	6.0509	6.3801	3.3558	6.0269
DJ02264	8.4067	4.5662	8.8509	5.6554	3.6133	6.6226	5.315	4.0794	4.4283
DJ02265	11.5244	13.2456	11.1384	3.7697	2.1831	4.5467	3.2132	1.6066	3.5848
DJ02266	0.8038	0.2234	0.3037	0	0	0	0	0	0
DJ02267	1533.72	597.513	3064.22	26.2432	34.0608	167.043	9.1296	4.3177	7.5963
DJ02268	0	0.0384	0.0522	0.1641	0.1602	0.2605	0.2313	0.1002	0.4193
DJ02269	0.6388	0.3995	0.6336	0.1263	0.2776	0.2006	0.1187	0.1158	0
DJ02270	6.3065	31.8321	17.0572	24.2461	23.6772	18.7	9.2736	10.0748	8.0699
DJ02271	6.4775	6.2699	8.5909	8.4098	7.9315	9.1848	7.3999	5.9653	7.3241
DJ02274	1.234	3.0322	0.7328	2.2054	14.8882	2.0298	7.8399	15.8145	5.2932
DJ02275	3.1973	1.4292	3.773	1.0611	1.0794	1.0607	0.8587	0.8642	0.7533
DJ02276	0	0	0	0.1567	0.2583	0.3733	0.2578	0.1436	0.1202
DJ02277	0	0	0	0	0.025	0.0361	0.032	0.0312	0.0349
DJ02278	0.118	0.1504	0.327	0	0.0313	0.0453	0	0	0.0875
DJ02279	9.5233	10.2672	16.2218	10.2528	9.1049	9.7666	11.6028	10.0598	11.966
DJ02280	5.4594	2.5531	4.1826	1.8398	0.9381	1.9966	1.2257	0.8749	1.238
DJ02281	0.2662	0.3618	0.4611	0.9332	0.4714	0.9877	0.7863	0.3243	0.5592
DJ02282	0	0	0	0.0494	0.0724	0.1307	0.1161	0.0453	0.0505
DJ02283	0.053	0.0607	0.0826	0.0288	0.0211	0.1525	0.1354	0.0264	0.1178
DJ02284	0.1639	0.1253	0.146	3.3626	1.959	2.4266	4.3572	3.5012	4.7917
DJ02291	1.1061	0.2114	1.0058	8.7237	5.3979	8.1191	10.3189	7.0287	10.917
DJ02292	0.092	0.0469	0.1913	1.3014	1.0998	1.4834	0.8154	1.223	1.0916
DJ02293	0	0.2114	0.1437	0.1504	0.1102	0.3184	0	0	0
DJ02294	0	0.0701	0.3813	0.0998	0	0.1056	0	0	0
DJ02295	0.3014	0.428	0.7608	0.2342	0.2573	0.2975	0.2862	0.1502	0.2155
DJ02297	0.0793	0	0.0275	0.4599	0.3158	0.7301	0.2701	0.3951	0.4408
DJ02299	36.8485	38.13	39.3767	33.8171	25.4301	32.0533	31.9593	27.8256	27.9917
DJ02300	3.9377	2.8259	3.5074	7.4305	5.6342	6.8468	5.6687	5.2064	5.5406
DJ02301	7.3191	6.3486	12.4656	8.4408	8.0367	10.1654	7.0751	5.8947	7.3695
DJ02302	1.1111	1.1772	1.3977	2.7566	0.7765	2.5137	0.9566	0.6606	1.1055
DJ02303	0.7912	0.6653	1.3155	1.0328	1.0716	1.0021	0.6471	0.7886	1.5838
DJ02304	1.2645	7.4838	1.6531	1.0206	0.5525	0.9863	1.3761	1.7076	3.1299
DJ02305	0.0329	0	0.0342	0.0358	0.0524	0.0757	0	0.0655	0
DJ02306	6.4853	5.3041	5.621	6.5926	5.6182	6.717	6.8038	6.8311	7.1804
DJ02312	0.0545	0.75	0.2266	0.2372	0.0434	0.3138	0.6687	0.2173	0.3031
DJ02315	0	0	0	0	0	0.0392	0	0.034	0.0379
DJ02316	6.4737	4.0276	14.3864	0.3049	0.1786	0.8067	0	0.0279	0.1247
DJ02317	9.8198	12.9627	13.8865	9.3881	5.8072	7.8969	7.5552	5.7768	6.3607
DJ02320	73.9582	137.63	65.2614	92.1973	70.6081	84.9459	77.9091	71.744	84.6461
DJ02321	9.6735	11.8746	9.1825	6.7792	2.4085	4.7657	3.8037	2.5959	3.8789
DJ02322	8.9215	7.119	7.0104	11.4598	7.77	10.1875	11.0448	7.9423	9.4319
DJ02323	4.0795	4.4016	5.9592	3.2712	2.7302	3.2745	3.4318	2.0447	3.2145
DJ02325	3.1397	14.3622	2.8943	1.928	1.7349	2.099	2.4332	2.5742	2.8157
DJ02326	2.8695	7.3742	2.0302	0	0.0486	0.1406	0.1872	0.1217	0.0679
DJ02327	5.5596	12.1876	4.1631	0.2668	0	0.6589	0.3343	0.2445	0.4546
DJ02328	16.9637	10.8921	14.0137	28.3437	1.6773	9.2739	9.0143	2.2808	9.3643
DJ02329	18.124	20.9195	23.2486	16.1745	11.8243	16.4208	14.6932	13.7755	14.0193
DJ02330	4.0898	6.5507	6.9484	7.5208	7.4737	9.1935	7.3004	6.2118	6.9304
DJ02331	182.076	171.502	136.883	9.6101	10.5735	16.5574	9.4772	9.082	11.7627
DJ02332	0.7835	0.5324	1.0856	0.7813	0.6242	0.5012	0.7788	0.6725	0.5083
DJ02333	2.1432	3.2768	7.3179	12.3234	18.2953	19.2125	15.0247	15.0301	15.7474
DJ02334	48.4047	41.3156	40.1987	183.224	181.909	187.086	161.896	143.787	157.339
DJ02335	64.735	34.0709	41.7523	3.6654	4.5556	18.1632	1.8267	2.4934	2.7819
DJ02338	5.6864	4.9925	4.739	4.5321	3.2296	3.9542	4.2017	2.6375	2.9739
DJ02339	25.3284	81.5408	25.7385	8.6313	5.801	9.7805	6.3303	4.4971	6.1938
DJ02340	21.5903	13.9879	16.975	4.8901	5.9524	3.0617	5.5019	5.6797	6.4072
DJ02342	11.095	24.061	31.0706	27.2013	34.8507	36.9338	35.433	34.5462	33.4731
DJ02343	9.1049	4.938	11.4646	8.0529	7.5154	8.4762	7.086	8.973	7.8446
DJ02344	9.549	13.9782	14.6382	15.9127	16.5106	21.3649	15.4395	14.783	15.5894
DJ02345	0	0	0	0.1337	0	0.2123	0	0.1838	0
DJ02347	64.4041	31.4303	41.5897	5.1263	3.5913	4.4822	3.3515	3.4718	2.4304
DJ02348	247.438	208.356	268.703	165.045	158.41	196.308	147.922	115.659	144.361
DJ02349	24.7127	54.3379	41.1496	50.5189	63.7355	53.0515	44.9105	33.8102	42.6188
DJ02350	9.4126	8.3683	12.4097	9.7655	10.2412	10.909	10.5554	7.708	9.4297
DJ02351	35.5123	27.7149	22.3287	0.595	0.0934	0.3598	0.1198	0.4673	0.5213
DJ02352	1.06	0.5402	0.8567	0	0.0938	0.1356	0	0.2348	0
DJ02353	21.7387	13.1304	22.5345	3.8537	2.9507	4.326	3.2376	2.6215	4.1186
DJ02354	3.7824	5.3511	6.6872	6.4735	6.9592	6.2363	7.7543	6.3538	7.0103
DJ02355	3.849	4.577	4.7674	4.3139	4.4914	5.5507	4.4517	3.604	4.41
DJ02356	17.6894	19.5039	21.7406	20.7229	20.6433	18.4087	18.3742	17.9708	20.3019
DJ02357	0.4059	1.9649	0.1406	133.33	402.138	129.126	245.629	213.051	151.043
DJ02358	0.749	1.6876	2.7857	6.2611	5.9362	5.7645	5.3199	5.1475	6.1375
DJ02359	10.3582	14.3609	17.5927	9.8341	6.744	7.8011	8.5779	7.1605	8.2779
DJ02362	9.7789	7.4755	11.2549	11.3435	12.1233	12.2897	10.8208	9.9701	10.7999
DJ02363	8.5006	24.9431	6.5137	136.278	148.655	149.974	169.859	235.017	210.26
DJ02364	12.4536	26.2848	23.5626	50.7884	63.564	68.5515	54.0208	62.4606	58.5409
DJ02365	24.3657	19.5514	25.5297	27.7617	29.4767	29.3205	38.1425	33.2771	33.62
DJ02366	12.5552	19.3116	13.1061	25.6262	28.0928	28.7806	26.3294	19.5359	24.8494
DJ02367	34.5759	24.3648	33.2828	47.0858	38.8353	50.1661	51.2146	57.7064	59.7275
DJ02368	10.5288	13.1209	13.6604	7.6243	9.133	12.1584	7.7067	8.4453	8.9026
DJ02369	18.3706	17.7935	20.1045	32.9977	27.9364	30.5744	33.4677	24.8717	31.7846
DJ02371	195.487	132.826	118.974	0.7106	1.1828	2.2562	0.7285	0.5327	1.3207
DJ02372	4.711	9.0943	10.7801	9.3694	10.0658	10.5469	11.3838	10.1977	10.7159
DJ02373	6.6584	9.397	12.2923	45.0768	38.8633	36.0847	36.2544	37.9968	34.1743
DJ02375	2.1827	2.952	2.0937	2.3743	1.739	0.7732	2.0597	1.0041	2.8006
DJ02376	2.4829	3.6426	5.9761	2.3633	2.1091	3.6575	3.0796	2.8934	3.9183
DJ02377	1.2635	4.3705	1.6084	0.5498	0.7046	1.1274	0.9042	0.4408	0.8079
DJ02378	1.2571	0.7208	2.5311	43.333	53.1458	33.1095	53.4157	48.398	46.6574
DJ02379	0.1561	0.0895	0.0405	0.1273	0.0932	0.0898	0.0798	0.0389	0
DJ02380	0.2114	0.6263	0.563	0.3738	0.3685	0.426	0.6755	0.4215	0.5143
DJ02381	1.9595	1.8659	1.9648	24.8684	12.6811	18.2469	12.125	10.3481	14.1448
DJ02382	2.8813	1.9708	3.7821	1.3197	0.8457	1.2222	2.0155	1.1337	1.3491
DJ02383	0	0	0	0	0	0	0.4159	0	0.1508
DJ02384	17.0058	12.5001	14.146	16.9426	19.6718	14.1672	18.4303	15.7279	15.8654
DJ02385	35.8589	31.3123	33.1574	34.0233	33.4024	34.8364	36.1665	30.8975	33.791
DJ02387	8.1814	12.0867	9.2927	21.256	20.3429	23.1989	24.742	24.7296	25.3476
DJ02389	3.357	1.5339	2.045	2.7703	1.4449	2.7101	1.3018	1.7692	1.416
DJ02390	4.0711	5.4092	11.2814	10.1224	21.0827	21.316	20.8098	20.0957	13.905
DJ02391	43.337	94.8599	56.7021	885.465	1230.85	1073.53	726.826	708.224	731.645
DJ02392	8.4933	10.0939	19.4847	13.2276	19.265	16.8861	14.0209	17.6714	14.9158
DJ02393	2.4203	3.4263	4.5644	2.8603	2.9519	3.5091	3.238	1.9656	3.9209
DJ02394	4.0822	3.412	5.3793	4.133	5.5839	4.5019	5.2921	3.6522	4.4029
DJ02395	0.9176	0.3897	0.6963	0.5387	0.6731	0.6373	0.5361	0.6243	0.5669
DJ02396	33.8252	17.6382	28.9262	3.6609	2.454	4.5644	2.6825	2.2173	3.1082
DJ02397	13.3131	11.9535	15.1833	14.2545	16.8274	16.2201	16.2854	14.6259	15.8756
DJ02402	0.5218	0.4829	0.6279	0.4482	0.4158	0.4743	0.4212	0.3833	0.3971
DJ02403	0	0	0	0	0	0	0	0	0.1315
DJ02404	0.073	0.2791	1.2142	0.5561	0.8727	0.6726	0.8212	0.5095	0.5279
DJ02405	0	0.0904	0	0	0	0	0	0	0
DJ02406	14.2357	21.3135	21.608	33.4971	44.1828	29.9673	33.5627	24.1766	32.7033
DJ02407	0	0.2712	0	0	0.1413	0	0	0	0
DJ02408	13.3468	16.7281	36.6092	10.8891	12.3646	15.367	15.0727	14.8501	14.6696
DJ02411	4.2652	7.71	6.0974	6.4853	7.3783	7.841	7.2272	4.7915	6.3415
DJ02412	3.1463	3.5445	3.7858	4.6235	4.2659	4.8301	3.4987	3.3562	3.0692
DJ02413	17.4101	18.5522	19.1298	10.7607	9.4274	10.999	11.1724	9.8786	11.7967
DJ02414	17.1001	26.4484	17.3567	74.0359	124.154	78.3616	80.7305	84.6555	81.6871
DJ02415	6.3621	8.7728	4.9794	8.191	6.1595	6.9542	6.9158	6.4216	5.8659
DJ02416	2.9691	3.9422	2.6957	8.5336	12.1266	9.464	9.905	10.654	7.9243
DJ02417	0.8672	1.1863	0.8063	0.9433	1.2727	1.1036	1.1199	0.6824	0.6598
DJ02418	0.7166	0.3595	1.1869	1.2424	1.2668	1.444	1.6256	1.0938	1.3697
DJ02421	0.4643	0.0986	0.4557	0.3367	0.3494	0.5049	0.501	0.3085	0.3155
DJ02422	0.042	0.2888	0.1309	0.137	0.0334	0	0.0429	0.0418	0
DJ02423	18.6808	30.7893	25.0573	30.4962	21.3011	26.2373	29.9607	19.4914	29.9674
DJ02424	37.2695	97.1487	103.49	90.4997	135.81	144.091	127.526	132.251	115.617
DJ02425	0.9643	1.2637	0.8947	1.1614	0.7683	1.15	1.1619	0.8925	0.766
DJ02426	11.312	10.1611	9.7927	32.8275	31.7262	30.3759	30.1579	30.7188	30.0928
DJ02427	8.8172	6.8042	9.3363	13.6826	12.7845	14.5301	12.1754	11.0793	11.1992
DJ02428	2.6834	3.823	6.1264	3.2508	3.8872	5.126	3.1798	2.8773	2.5094
DJ02430	14.9265	18.5841	16.9368	19.8786	19.1499	20.5346	19.6357	18.4332	17.3312
DJ02431	22.3934	30.7635	21.6965	22.8456	17.3519	20.7867	21.0937	18.1991	22.8083
DJ02432	17.2171	18.9303	23.4492	6.5352	4.2027	5.2299	3.3705	5.6229	4.481
DJ02433	13.6674	14.6639	19.5146	15.7923	16.6896	14.5189	18.5409	14.3398	17.2228
DJ02434	2.1216	3.7223	5.0238	3.6699	4.3505	5.5662	5.618	4.6453	4.7186
DJ02435	2.1074	2.181	2.3584	2.1514	3.513	2.5757	2.7842	3.1023	2.5238
DJ02436	8.5641	10.5711	12.2472	10.3845	9.0141	10.1319	9.5988	10.1808	9.8295
DJ02437	51.9361	42.0605	42.6318	28.6812	21.3233	22.3	27.6328	22.3794	25.669
DJ02438	6.6965	7.291	9.4893	10.1543	10.1451	9.6669	10.4506	9.4053	10.0138
DJ02439	71.5782	90.5631	76.1469	81.7567	67.7565	73.1938	66.4169	61.7919	67.9957
DJ02441	8.9422	6.9018	7.9479	3.0027	2.0617	2.8802	2.4104	2.0061	2.3981
DJ02442	115.386	101.513	125.172	85.7022	79.6946	77.9194	89.9635	86.8443	90.6856
DJ02443	3.4351	4.2047	4.9508	3.6923	2.6391	3.649	3.031	2.2418	2.9105
DJ02444	16.9197	13.0333	18.1207	14.2736	15.5779	13.07	16.2384	16.4773	17.2315
DJ02445	7.1305	9.159	10.0813	7.0179	8.1157	8.154	6.1987	4.9316	6.0415
DJ02446	28.2359	28.9064	48.7615	24.2673	23.729	23.668	26.6872	26.3102	28.0875
DJ02447	58.7588	59.5922	67.7308	60.4718	55.5671	59.907	67.3272	54.2813	61.4301
DJ02451	0.9521	1.0008	0.4947	42.206	56.5137	46.1793	40.152	59.0764	48.4403
DJ02452	0.3526	0.0898	0.1221	1437.39	1809.99	1310.96	1633.23	1568.68	1600.37
DJ02454	53.151	53.4846	53.8769	27.8991	23.3124	29.5869	34.3267	25.6634	30.5299
DJ02455	1.0538	1.4569	0.8621	8.6587	5.5021	5.0599	3.6905	4.8273	4.2887
DJ02457	6.6457	17.5628	4.8748	1.8646	1.1739	1.9389	1.2604	0.4196	1.3711
DJ02458	10.6373	11.2382	16.0841	3.9004	5.0468	7.087	5.865	4.11	4.3861
DJ02459	54.333	33.9542	50.8763	23.4605	20.2489	23.9929	17.5465	14.619	17.2355
DJ02460	3.1749	2.3912	2.5842	16.2477	21.3575	18.5656	21.7613	22.0584	20.7665
DJ02461	14.1471	33.4154	22.8484	164.995	175.559	170.803	145.123	153.889	164.287
DJ02463	6.3281	3.6818	5.5885	2.138	1.7551	2.8348	1.8768	1.593	2.2096
DJ02464	66.1842	39.4835	65.2658	40.4795	40.4722	38.5629	46.193	38.8833	36.0025
DJ02465	6.5938	4.8006	3.9155	4.1557	1.9596	3.4947	3.5845	2.7645	3.4335
DJ02466	2.3549	1.9208	4.2826	2.8934	4.4141	4.055	4.6108	3.5314	4.1152
DJ02467	3.0132	3.5831	4.088	4.3704	2.7341	4.2884	4.1501	2.9616	4.0023
DJ02468	1.2302	2.8885	0.3653	0.1912	0	0.1012	0.0898	0	0.0977
DJ02470	20.8739	33.9322	35.8139	7.1258	3.1158	5.8536	4.248	3.8493	4.349
DJ02471	119.573	83.6466	107.289	87.7594	21.0282	47.6959	40.8451	23.9199	38.9309
DJ02472	2.5435	2.4397	3.3413	3.0801	2.7338	2.9285	2.6248	2.033	2.4282
DJ02473	2.0073	1.5874	2.3018	3.4637	3.1434	3.4269	2.5711	2.3918	2.5658
DJ02474	1.5609	2.1069	2.9147	2.0164	1.8654	2.3588	2.0695	1.6288	1.7087
DJ02475	54.9327	28.6031	27.9555	3.385	5.0184	5.2586	3.5148	2.4513	3.1535
DJ02477	0	0.0534	0	0	0	0	0	0.0348	0.0777
DJ02478	0.9976	7.016	1.866	0.6511	0.3179	0.5743	1.0199	0.4474	1.7195
DJ02480	29.1437	10.9666	15.3105	13.2856	7.7741	12.6483	7.5972	8.3088	8.8388
DJ02481	10.7454	9.4978	15.8771	7.123	4.1468	7.3458	4.4628	4.1837	4.8544
DJ02482	0.8142	0.4618	0.9279	0.5142	0.3766	0.7862	0.5638	0.3403	0.4381
DJ02483	27.2528	15.9376	18.6914	16.4535	11.6163	13.9632	17.5526	11.4089	15.6078
DJ02484	6.2444	5.3947	6.0001	9.1655	11.8242	9.4056	7.5207	7.7587	7.6099
DJ02485	30.9906	18.1949	25.5919	7.7541	3.8998	6.305	4.4725	4.8484	4.1165
DJ02488	302.305	368.392	573.645	114.76	225.997	737.78	21.3422	76.0844	97.2911
DJ02490	1.9763	1.6138	2.8005	1.5146	1.6103	1.2928	2.5255	2.328	1.4984
DJ02492	743.361	185.999	586.797	406.357	544.207	314.637	526.375	651.717	520.788
DJ02493	16.1711	13.0161	15.6486	7.8182	6.6805	7.2571	8.6888	8.5566	8.1827
DJ02495	18.8381	13.3821	16.5756	15.4186	17.7916	15.7616	14.3047	13.5039	15.1334
DJ02496	19.4543	24.5898	20.3007	3.1368	3.1711	3.928	2.2421	1.5788	2.2582
DJ02497	24.0259	27.2075	27.4778	35.7334	32.4438	34.3517	33.7212	26.2205	31.0048
DJ02498	0.1266	0.1936	0.5922	0.6199	0.454	0.729	0.712	1.1359	0.7041
DJ02499	0.9434	1.3942	1.6992	8.6201	4.3092	5.648	24.7537	7.0208	23.0095
DJ02501	12.3956	17.7412	13.3512	26.2298	27.6088	25.0539	22.2922	23.583	22.8399
DJ02502	1.2969	3.0568	3.2007	7.759	13.8194	13.1896	9.3359	7.8635	7.5113
DJ02503	87.6667	80.6533	80.3258	80.6645	69.7672	77.6262	73.2466	77.5358	75.2482
DJ02505	32.9525	16.0063	35.4556	14.407	10.3256	11.9449	14.9582	13.2009	15.1137
DJ02506	6.9513	4.6104	5.6771	5.9216	2.7925	4.5767	3.7434	2.9081	3.9631
DJ02507	137.609	41.089	91.3452	1030.67	1016.05	751.828	312.825	502.651	317.321
DJ02508	3.8639	5.3168	3.6584	118.904	93.5166	94.8089	146.333	180.157	180.086
DJ02509	179.119	112.009	172.993	143.657	116.66	126.993	163.504	223.586	189.264
DJ02510	61.6018	77.5072	49.5377	65.6702	62.3709	63.0383	57.4971	52.8865	58.8452
DJ02511	26.6396	12.4836	30.2543	13.1885	19.2529	17.2827	21.5852	17.4278	18.7102
DJ02513	17.5165	16.7381	15.7934	14.9074	18.5118	16.4309	18.0656	16.6891	14.8958
DJ02514	10.9389	21.5826	12.45	3.0032	0.581	2.459	1.6508	2.0768	1.5061
DJ02515	17.6373	15.409	21.5818	31.5602	34.1556	31.3777	25.2094	36.5076	24.1872
DJ02516	21.0798	12.0793	18.4571	6.5089	6.0137	6.3547	7.1893	6.2725	6.6922
DJ02517	57.0899	37.4363	55.8109	56.0455	59.4988	62.7954	56.5557	51.094	53.1851
DJ02518	41.3223	31.7251	29.0491	300.598	358.57	296.921	397.667	517.316	398.935
DJ02520	124.236	160.039	92.6924	48.1726	51.7865	50.7107	29.435	44.1995	29.3472
DJ02521	28.6817	43.5338	17.5252	33.9779	25.5006	30.0149	33.511	28.4698	30.4426
DJ02522	6.1098	4.2937	7.5165	3.7851	3.8419	5.1735	4.9298	5.0522	3.9913
DJ02525	15.1919	22.6352	13.7759	1.3684	0.9765	2.0797	0.6595	0.6108	1.363
DJ02526	11.9647	13.786	18.0194	23.6414	23.2556	25.0892	21.1546	23.6786	22.754
DJ02527	3.8992	15.8549	14.5696	20.3955	28.4214	31.9987	25.6136	20.2591	23.5253
DJ02528	0.5253	0.1606	0.3275	0	0	0.121	0	0	0.1168
DJ02529	32.3543	24.4827	55.6164	21.6754	20.4968	23.9592	21.6383	20.6989	21.8254
DJ02530	27.2465	34.1789	34.7145	1.6554	2.4248	2.6699	2.5558	1.7696	2.619
DJ02531	0.3988	0.2371	0.5066	0.5544	0.5119	0.4592	0.521	0.2429	0.3942
DJ02533	238.133	147.58	276.772	58.3194	21.2045	41.7866	37.6241	27.2897	36.89
DJ02534	11.2763	22.1349	19.6624	8.1776	9.2378	10.1591	9.7044	8.509	8.7495
DJ02536	0.1446	0.2212	0.9019	0	0	0	0.2958	0.1442	0
DJ02538	0	0	0.1912	417.52	553.711	500.469	458.562	435.714	442.127
DJ02539	41.0338	70.3924	42.7087	76.2224	64.5556	67.1613	68.8419	58.7897	71.846
DJ02540	8.6592	13.96	9.3547	42.0616	67.9646	46.7895	36.2866	69.7313	40.6151
DJ02541	5.1451	3.0126	4.5882	0.2382	0.5814	0.8403	0.5969	0.4365	1.2579
DJ02542	2.6926	2.5895	7.2658	8.1256	8.0272	8.6503	11.3659	9.4798	9.9486
DJ02543	3.9421	14.0287	2.5427	0.2218	0.0542	0	0.139	0.0677	0
DJ02544	0.3224	0.7393	0.335	0.1169	0.1141	0.2062	0.1831	0.1785	0.1195
DJ02545	0	0	0.0304	0	0	0	0	0	0
DJ02547	1.0711	6.0048	2.69	4.7579	3.2713	3.186	2.1901	6.2279	3.772
DJ02548	20.7724	8.3855	23.5931	12.9632	12.1074	26.5181	14.0084	9.4805	14.3867
DJ02549	0.6177	1.4165	0.3209	4.1994	3.5677	9.008	6.525	5.0278	4.6936
DJ02551	59.0053	80.9473	98.3124	44.7813	56.3033	53.8053	52.1395	50.6824	47.8984
DJ02552	6.6664	6.4113	9.3608	3.0411	2.9697	3.9065	3.1756	3.1437	3.5871
DJ02553	13.6269	16.3905	16.1411	22.4943	30.7861	24.5766	22.2606	18.379	19.7104
DJ02554	46.5307	10.0444	26.2189	3.6649	4.1754	3.4049	0.3827	0.4851	0.4579
DJ02555	15.2043	13.3238	11.3681	14.119	14.9203	13.5562	17.6289	22.27	16.1861
DJ02556	0.511	1.5625	1.1682	0.1112	0.7328	0.4707	0.6269	1.528	0.9092
DJ02557	4.9765	3.6521	4.013	0.5197	0.222	0.1834	0.407	0.2381	0.1328
DJ02558	17.3189	26.9102	24.1527	2.1478	1.5281	2.9878	2.5376	2.0243	3.3249
DJ02559	141.597	103.131	96.6024	74.6486	67.8676	68.3857	71.8852	59.6032	66.0053
DJ02560	0	0.0336	0	0	0.035	0	0	0	0.0489
DJ02562	6.4772	6.7199	2.6603	0.1678	0.1229	0.2131	0.0946	0.0615	0.0686
DJ02563	11.4686	2.8434	12.1326	41.3047	43.7107	45.9783	24.2416	21.7812	26.7137
DJ02564	0.4223	0.5947	0.5775	50.5347	78.5217	67.2814	56.6731	57.1821	56.4558
DJ02565	0	0	0	3.8656	5.3085	7.3306	4.9953	5.1654	5.269
DJ02566	0.7161	0.2618	0.6794	6.4686	6.2259	8.2445	8.2435	8.1613	9.5209
DJ02571	0.0226	0.0173	0	0	0.018	0	0	0	0.0503
DJ02572	3.712	2.549	3.3997	0.1369	0.117	0.2415	0.0643	0.1463	0.2565
DJ02574	0	0	0.117	0	0	0	0	0	0
DJ02575	53.2723	54.9071	42.3026	46.7428	41.4753	41.0353	50.4371	42.4956	44.6637
DJ02576	7.491	37.4342	38.8738	33.0476	35.2932	35.4044	39.8983	32.3089	34.6581
DJ02577	2.6037	1.7831	1.2401	0.7081	0.6483	0.5621	0.1664	0.1081	0.3016
DJ02579	6.3949	6.3756	6.5524	23.8123	27.8794	26.2076	25.4876	24.8274	26.7049
DJ02580	0.1527	0.0778	0	0.0554	0.0811	0	0.3644	0.203	0.2831
DJ02581	5.7458	3.5938	9.9876	1.3637	1.3317	1.0825	0.6408	0.9372	0.697
DJ02582	112.456	100.895	82.8202	231.479	258.204	236.839	192.874	216.372	209.565
DJ02584	91.4384	47.5146	68.0952	43.8782	34.3667	35.2859	38.3019	32.3355	39.7476
DJ02585	6.6654	11.534	6.4857	4.0208	1.8345	2.8604	1.4248	2.2347	2.0215
DJ02586	1.2286	8.1007	4.5217	23.834	26.1026	21.9848	13.764	28.9311	16.509
DJ02587	0.2247	0.7795	0.2335	0.1504	0.179	0.1592	0.2297	0.1723	0.4228
DJ02588	0.5472	1.5212	0.7754	0	0	0.0573	0	0	0.0553
DJ02589	1.1103	1.5359	2.7471	1.3803	1.8534	2.4958	1.9459	1.3175	1.4699
DJ02591	0.8971	1.0489	0.9871	1.2055	1.2193	0.9114	0.5935	1.2624	1.3498
DJ02592	4.2053	6.6347	5.2068	80.6872	69.2894	133.511	60.2113	79.3722	67.137
DJ02593	96.0083	116.907	86.5074	138.777	186.717	185.613	128.608	239.154	136.84
DJ02594	3.2998	3.5247	5.2141	8.4576	12.3168	11.2938	8.4106	7.299	9.8525
DJ02595	2.2856	1.7472	1.4035	2.3168	2.2762	2.0335	2.6022	1.6569	2.3107
DJ02596	0.935	1.7075	0.8097	2.1473	1.6141	1.0168	1.6463	0.8284	1.3286
DJ02597	1.2611	1.1569	1.5289	1.2804	1.8085	1.936	1.2033	0.9218	1.6361
DJ02598	70.3972	44.0161	64.8331	59.0593	55.8009	59.0008	60.3611	59.0289	58.0823
DJ02599	19.9724	15.2233	5.7045	16.9617	41.3628	17.2131	98.8082	92.9589	68.4491
DJ02600	67.1431	115.442	64.758	22.7323	20.7929	22.9815	24.6691	21.483	25.1666
DJ02601	8.8126	8.8309	11.7279	13.639	7.944	10.2727	12.1139	8.8775	10.2352
DJ02602	5.9261	5.2641	6.2958	5.7261	5.9215	6.0988	6.6845	5.2633	6.1667
DJ02603	27.0667	16.2342	25.656	16.4401	12.7674	16.6506	18.3475	16.2974	18.4363
DJ02608	16.9151	10.2354	12.9861	10.4868	8.6762	6.9372	7.346	5.4717	6.9484
DJ02609	128.445	78.5827	89.6835	18.747	12.6577	13.7191	26.9094	20.3983	15.0472
DJ02610	10.4769	13.4461	11.6219	13.8801	14.7398	14.083	14.7426	12.1577	13.2231
DJ02611	111.571	85.586	100.081	99.196	108.593	98.3741	82.2136	106.778	83.3054
DJ02612	16.7112	18.2499	20.8174	21.8482	24.2714	24.3796	26.5815	25.6576	27.2983
DJ02613	4.3969	8.4665	5.3881	6.0916	4.5276	4.4416	7.2091	4.548	6.4118
DJ02614	1.5527	0.9232	0.7171	0.7507	0.2749	0.5959	0	0.172	0.5755
DJ02615	23.587	17.4767	20.9391	20.5814	17.4355	14.6316	18.859	15.4953	17.1826
DJ02616	0	0	0	0.0579	0	0	0.0545	0	0.0592
DJ02617	12.7403	11.2456	14.9689	12.1111	12.3756	13.6997	15.2934	12.3175	13.7424
DJ02618	7.7646	8.7984	9.1755	8.0353	6.0219	6.7642	6.3222	5.6503	6.5332
DJ02619	123.24	88.9041	113.137	10.3756	8.1763	11.7116	11.8493	9.2964	11.4123
DJ02620	13.6301	34.9633	27.8164	25.5353	30.4362	41.2383	42.4612	25.5863	34.7775
DJ02621	61.0625	52.1387	86.7641	43.1185	36.7354	51.7633	46.4029	42.9006	47.6502
DJ02622	25.9995	18.2811	39.1904	29.4547	33.1483	38.1791	34.8951	38.387	38.4213
DJ02623	6.6991	26.1896	24.4873	21.031	24.5327	26.2516	30.038	27.8804	27.6422
DJ02624	2.171	2.1575	2.7767	3.4335	2.9139	3.2303	2.4756	1.9808	2.4329
DJ02625	3.1478	3.35	3.5918	4.0285	3.9831	4.1217	4.1646	3.199	3.5691
DJ02626	13.1305	10.7699	12.8776	12.9159	10.7475	11.0513	11.812	9.1693	11.7835
DJ02627	0.3966	0.5237	0.2998	0.2157	0.158	0.4152	0.3686	0.4852	0.822
DJ02628	0.2838	0.5967	0.8111	1.3123	1.4699	0.8987	1.3783	1.2024	1.0258
DJ02631	4.2416	9.9437	2.3508	1.8456	0.4506	0.4884	1.1563	0.7046	0.1572
DJ02632	0.1134	0.0433	0.0589	0	0	0.1306	0.3478	0.1695	0.063
DJ02633	0	0	0	0	0	0	0.0775	0	0.0843
DJ02635	1.9952	1.1061	3.6402	0.0828	0.0485	0.2806	0.1713	0.2429	0.4234
DJ02636	1.1945	0.7659	1.3214	0.2934	0.2763	0.2218	0.2364	0.0384	0.6428
DJ02637	42.829	23.2331	49.2562	6.1605	5.3534	10.441	5.0636	6.4615	7.0065
DJ02638	3.7809	3.1656	6.7354	1.2186	0.4781	0.8983	1.5952	1.7946	3.0922
DJ02639	41.3902	25.2757	57.4325	20.4498	22.7556	30.5998	28.9519	28.7098	30.8826
DJ02640	39.3975	16.7082	52.1605	0.2677	0.3399	1.8704	0.6878	0.736	1.6058
DJ02641	15.4708	9.3427	23.3367	4.3792	3.5237	6.4433	5.149	4.6783	5.5005
DJ02642	10.5817	13.6767	14.6385	15.2333	9.9526	14.2299	15.2164	12.4513	14.9631
DJ02643	30.4418	17.0143	56.1859	18.8005	20.5791	26.5682	25.1032	26.2791	25.2232
DJ02645	167.052	83.1685	121.988	18.0191	15.015	14.8257	13.0683	7.0715	13.1377
DJ02647	24.6292	27.5932	18.8261	21.6032	29.1232	22.0733	20.4903	20.9832	21.2684
DJ02648	11.6343	10.7508	19.4635	10.6045	12.0194	15.2721	13.6258	11.7556	13.3999
DJ02649	136.973	156.561	142.681	346.636	341.329	288.75	344.75	289.82	329.058
DJ02650	46.2504	50.0221	47.5803	60.7076	51.8208	57.3159	60.6623	58.3975	62.7738
DJ02651	45.1509	89.2802	64.3593	167.737	131.937	128.881	157.433	120.923	155.419
DJ02653	3.5647	7.7949	12.4482	10.8215	12.0867	13.84	13.0516	12.7663	11.1087
DJ02654	94.3551	136.932	82.2798	104.487	75.0151	83.691	94.7265	73.9441	97.7098
DJ02655	17.489	25.9133	16.0587	16.5393	19.8581	18.9883	17.4123	15.0304	15.2447
DJ02656	20.4669	34.6397	15.7698	8.5682	3.1983	5.9175	4.4149	4.0315	6.0536
DJ02657	10.5775	10.1418	13.1032	10.5637	10.4508	11.4905	11.9134	11.0493	10.6661
DJ02658	164.427	136.762	135.524	116.844	102.861	109.287	112.524	97.6077	108.978
DJ02659	2.9364	3.4535	6.1029	6.1428	4.769	6.1767	7.2163	6.9794	5.3377
DJ02660	6.0599	5.8322	6.705	5.4538	5.8005	6.2242	4.1004	3.9109	4.1209
DJ02661	7.2458	6.1325	7.1454	9.2091	7.864	8.3	7.5209	6.522	9.1676
DJ02664	0.1475	0.5074	0.1533	0	0.0588	0	0	0	0.082
DJ02665	4.9948	5.5119	7.7229	7.449	8.1033	7.9538	7.536	6.3235	7.503
DJ02666	34.2703	25.2683	34.8754	29.3606	26.4155	23.414	26.091	19.7476	24.3987
DJ02667	4.3681	3.4505	6.6071	6.6875	11.7165	7.8234	8.8155	8.998	7.5202
DJ02668	20.6918	26.3473	21.2455	31.7138	36.268	35.5817	35.993	32.7526	30.7718
DJ02669	18.6839	11.7028	11.0231	0.5901	1.0084	2.9839	1.1707	0.3604	1.3405
DJ02671	1.0165	3.7557	0.8802	24.6942	33.4729	27.6975	21.9954	38.8371	27.8819
DJ02672	0.7874	1.0268	0.7701	0.2015	0	0.0533	0.0474	0.4617	0.1545
DJ02673	25.9566	25.712	32.9273	32.9797	31.7686	30.2862	35.0733	30.6811	34.2562
DJ02674	11.1279	4.5491	9.0284	8.9979	1.3749	6.509	2.8593	5.5755	3.3749
DJ02675	5.8125	6.079	6.7072	7.5642	6.3924	8.7452	6.7443	6.5755	6.1862
DJ02676	4.2516	3.5261	6.1061	12.8711	15.083	20.1115	11.4813	10.6542	12.1989
DJ02677	18.3337	20.9019	21.7591	17.1362	12.57	15.5303	17.1003	13.6873	16.1641
DJ02678	10.8807	14.4642	13.6227	12.5016	11.8021	14.4898	10.7662	11.4549	10.5934
DJ02679	13.0911	12.6074	12.538	16.0318	9.9568	11.6231	11.8933	11.1921	11.2261
DJ02680	24.1298	18.4461	31.7416	30.2108	36.4048	32.4763	35.3104	29.538	34.1057
DJ02681	6.624	30.6607	13.3887	0.4751	0.116	0.3352	0.0744	0.0726	0.6476
DJ02683	10.0112	10.1276	9.259	10.1643	6.0751	8.1263	9.6719	2.0622	5.2882
DJ02684	13.9124	12.0449	14.2638	16.0255	10.5501	14.5173	13.5376	11.7694	13.193
DJ02685	0.2686	0.6161	0.5583	0.7306	2.3543	2.4744	1.6478	2.6776	1.643
DJ02686	1.8541	1.4173	2.0912	2.2136	2.9363	3.3062	2.8894	2.2086	2.4138
DJ02687	48.3716	29.9057	54.4132	40.9771	40.7544	43.5453	43.7647	40.8914	43.4029
DJ02688	0.7429	1.5572	1.544	0.4953	0.3246	0.4415	0.343	0.3344	0.3465
DJ02689	125.466	261.933	304.007	288.559	365.704	413.673	325.238	334.073	298.844
DJ02691	107.555	84.9562	123.564	132.446	143.911	134.557	136.393	123.966	126.709
DJ02692	11.1578	12.1897	13.2389	11.0506	11.311	13.374	10.0874	8.8805	11.7598
DJ02693	3.6396	1.9476	4.2234	4.2231	2.6097	3.2825	2.8526	3.0231	3.0355
DJ02694	36.4247	19.8789	42.183	514.406	440.831	415.729	449.955	593.218	477.011
DJ02695	20.3056	32.1326	25.8631	9.6262	1.5737	7.1866	11.5507	7.324	12.213
DJ02696	16.355	20.7191	23.1443	18.7644	15.8055	18.3224	18.6227	15.8379	17.6966
DJ02697	33.8975	50.3128	35.1518	57.3297	45.7903	47.6156	47.4465	47.1749	52.1212
DJ02698	17.2144	15.5038	20.6597	6.0755	4.0602	7.2662	6.573	5.9212	7.1828
DJ02700	25.4968	5.0799	8.8645	0.1538	0.0375	0.2171	0.0964	0.094	0.1572
DJ02701	3.2844	8.9273	4.614	4.433	3.6102	3.6065	2.736	2.6675	2.6379
DJ02702	17.101	11.581	8.4214	2.015	0.9751	2.3422	0.9976	1.2693	1.3242
DJ02703	22.8895	21.2755	18.8563	17.0727	13.9529	15.4302	14.3475	12.9639	13.3206
DJ02704	82.4542	92.1241	65.3213	140.796	121.32	128.243	112.605	94.2639	107.921
DJ02705	72.6684	175.104	142.26	131.601	118.18	135.012	280.154	197.293	264.001
DJ02706	4.3783	2.403	4.5498	3.3584	6.1716	6.3337	5.9108	6.2104	6.4295
DJ02707	44.3776	39.6814	31.5125	63.0493	64.7129	56.5141	57.0543	56.6315	61.3883
DJ02708	113.865	115.906	89.7656	32.422	16.0411	25.3519	25.6666	19.2514	28.0709
DJ02709	9.1224	7.3552	16.7427	7.2574	6.7617	8.1517	7.2381	6.2879	6.5106
DJ02710	5.3749	7.4925	4.8344	4.5202	5.7756	4.3423	3.4401	3.7816	3.1392
DJ02711	19.213	25.7785	22.225	37.1556	32.0319	36.0948	32.8982	29.7106	32.1804
DJ02712	0.2623	0.822	0.2725	31.2113	72.0255	48.6464	46.5459	43.368	38.6146
DJ02716	0	0	0	0	0	0	0	0.1802	0
DJ02720	0	0	0.0977	0	0	0	0	0	0
DJ02721	15.0849	17.5976	17.2648	21.13	20.1843	18.3675	18.8441	16.4775	17.4185
DJ02722	0.2753	1.0944	0.2575	0	0.0439	0.0634	0.1689	0.0823	0.2449
DJ02723	1.411	1.3287	1.3886	0.9555	0.6328	0.85	0.8598	0.5123	0.7378
DJ02724	5.89	4.1691	5.35	11.0584	8.3425	11.6543	9.7237	16.8732	8.5877
DJ02726	3.7221	3.9124	4.1701	1.202	0.6024	1.3392	0.9513	1.1594	1.2935
DJ02727	4.658	4.7477	8.4708	2.815	1.9071	4.7672	2.1164	1.2897	1.9425
DJ02728	12.7815	11.4579	20.1621	2.6007	1.3553	2.7527	2.7262	2.5663	2.5053
DJ02729	6.2732	10.2514	21.0684	2.9175	2.173	3.245	4.229	3.3529	3.3869
DJ02730	4.0062	9.0469	13.5088	5.8477	8.0446	10.896	9.3405	8.4548	9.3419
DJ02731	32.0073	18.116	28.1112	18.8479	22.3243	20.8929	19.9227	16.1557	19.765
DJ02732	72.1787	65.1961	57.4387	19.6292	20.7324	19.6826	16.1174	16.2819	15.9476
DJ02734	0	0.0443	0.482	0.1892	0	0.2003	0.5927	0.1156	0.1289
DJ02735	16.177	17.3062	16.6678	20.6385	18.3652	22.7941	18.178	16.2613	18.9578
DJ02736	2.9969	2.0576	2.3069	2.5658	2.1887	2.1086	2.5815	2.0191	2.0058
DJ02737	17.9734	11.8487	17.3118	13.9595	14.7662	13.4845	14.522	11.9047	13.4538
DJ02738	16.7179	16.0772	22.6083	31.763	30.805	42.0565	39.138	26.9734	32.3858
DJ02739	0	0	0	0	0	0.0202	0	0	0
DJ02740	0	0.0303	0	0	0.0316	0.0228	0.0405	0.0593	0
DJ02742	0.1245	0.1904	0.2804	0.4967	0.5292	0.7408	0.4668	0.4551	0.4616
DJ02744	6.4813	3.1105	5.7989	7.082	7.8035	9.8717	9.2407	6.7498	7.3691
DJ02745	1.9583	1.3681	1.7183	1.7705	1.6635	2.0232	1.6772	1.5253	1.5431
DJ02746	25.6019	37.2901	17.4856	26.1833	28.5209	31.0168	27.3128	26.6291	24.9388
DJ02747	34.0762	37.1333	43.9768	47.8767	59.4875	43.8101	77.9883	67.9668	71.819
DJ02749	50.981	45.4527	47.6429	67.6661	46.3723	54.9863	53.4619	50.5172	53.6394
DJ02750	325.846	312.516	348.368	313.596	314.349	323.44	285.257	229.766	279.562
DJ02752	3.1551	2.8461	3.3443	31.4386	30.5669	46.3531	52.512	86.9857	40.1386
DJ02753	0.3963	1.8937	1.4416	0.8982	0.3684	1.0268	1.6883	0.7901	1.2855
DJ02754	5.4985	6.8418	5.1697	9.1403	8.1167	9.1262	9.9528	7.5447	8.6293
DJ02755	13.0935	13.4523	12.9791	18.9909	10.6907	16.9999	9.7308	9.9501	13.0115
DJ02756	2.9473	1.9026	3.1989	2.6124	3.931	3.8459	2.0534	2.1761	1.8451
DJ02758	9.7301	12.9832	12.0823	17.3478	21.5772	19.3725	20.9002	17.1384	18.6327
DJ02759	0.2137	0.245	0.111	0.4068	0.4682	0.246	0.2731	0.2662	0.4159
DJ02760	7.611	9.9422	13.6888	14.1931	21.9563	20.8484	16.9299	16.8396	14.5558
DJ02761	0.4204	0.8569	0.6116	1.2804	2.2774	1.4843	1.4898	1.0335	1.3401
DJ02762	1.2179	22.5309	3.4425	8.0021	2.6393	4.5433	3.9345	4.8557	5.7967
DJ02763	48.9618	53.9622	40.7944	46.4602	41.673	43.9434	49.7949	45.6864	45.555
DJ02764	46.443	41.8224	42.1519	11.5874	3.4852	12.3626	10.9189	5.8608	10.2346
DJ02765	0	0	0	0	0	0.0613	0	0	0
DJ02766	0.6181	0.7732	0.4671	1.4669	1.8354	2.0055	1.4361	1.3441	0.8748
DJ02767	144.378	129.344	111.607	115.687	110.973	120.799	93.1971	95.2252	98.756
DJ02768	195.439	341.51	183.925	70.9674	173.55	64.9525	101.016	95.0725	92.8312
DJ02770	0	0.1974	0.2683	0.0468	0.0686	0.1982	0.044	0.0429	0.0479
DJ02773	82.8404	69.7895	87.0099	83.2423	72.8059	75.8121	70.7722	68.7347	72.7281
DJ02774	1.8966	2.2174	2.7437	9.83	7.9699	8.5633	6.5771	6.3013	7.0302
DJ02776	301.458	256.274	344.683	301.607	167.071	352.236	170.762	165.875	208.71
DJ02778	3.2703	5.7813	1.6143	2.8905	1.6285	1.5532	4.4717	4.4821	7.0917
DJ02779	0	0	0	0	0	0	0	0	0.0462
DJ02780	23.6331	18.3965	21.2544	26.5625	22.7073	23.7752	23.5989	21.8344	20.955
DJ02781	2.0613	1.6162	2.9476	2.1657	1.6423	2.0285	1.8372	1.2292	1.7633
DJ02782	29.9631	20.6543	30.1168	26.7497	30.3752	31.3461	31.7941	27.2393	31.1947
DJ02784	5.1442	5.0561	4.2227	8.8406	9.1957	6.4206	4.7729	19.3464	6.1532
DJ02785	11.9	21.0193	8.8631	54.7399	67.5638	43.1614	29.7707	91.6106	41.1001
DJ02786	14.6131	23.208	15.0678	27.3564	23.1947	24.2594	25.2464	15.2429	19.7776
DJ02787	0	0	0.0554	0.1159	0.0849	0	0	0.1062	0.0592
DJ02788	12.906	25.0702	16.3369	34.0442	35.0126	31.1082	30.2381	23.2497	27.3217
DJ02789	15.1858	22.2719	21.6944	47.943	49.7012	49.9607	46.6695	38.9043	46.6723
DJ02790	0.217	0.4976	0.1127	0	0	0.1249	0	0	0
DJ02791	0.2767	0.0961	0.2614	0.301	0.1202	0.3185	0.4114	0.2256	0.2517
DJ02792	37.5169	28.0862	33.4271	34.9355	21.9159	27.5388	26.64	21.2602	26.9053
DJ02793	94.2122	117.397	120.404	83.579	88.0749	75.8873	74.0816	70.9967	83.8568
DJ02794	24.4633	15.0863	25.0462	15.1096	7.6653	10.8128	11.4809	7.7569	9.8958
DJ02795	0	0.0479	0	5.9321	5.1937	2.3094	2.9477	3.8111	3.2761
DJ02796	1.1556	1.044	0.9825	1.4856	1.3392	2.4191	1.074	0.6283	0.9346
DJ02797	0	0.0678	0.0922	1.3508	2.4027	1.4298	2.8111	1.7682	0.8877
DJ02798	24.9231	21.336	22.3213	13.7418	11.9176	11.7356	12.4484	9.4094	11.3347
DJ02799	1.6352	7.0536	6.9182	6.6068	9.4916	7.2618	13.1346	14.5521	14.5471
DJ02800	0	0	0	0.1382	0	0.1463	0	0.3799	0
DJ02801	17.7234	16.3285	19.8474	23.8768	15.9475	19.7649	18.8894	18.4819	22.8058
DJ02802	55.5681	58.0716	45.4472	34.3415	21.6968	33.1321	34.9795	21.0998	29.7936
DJ02803	106.906	86.0566	92.1094	103.505	86.4543	99.3277	85.2556	98.9705	92.4553
DJ02805	0.4586	0.3506	0.5719	0.6985	1.0231	0.6337	0.6564	0.9143	0.9181
DJ02809	30.898	36.3385	32.0356	48.1355	34.0293	40.4847	35.0183	32.0514	35.526
DJ02810	21.8124	19.6896	28.5042	11.1488	8.9272	10.8369	10.6915	10.2154	11.7959
DJ02811	18.385	19.283	13.1347	0.2976	0	0.189	0.7272	0.5999	0.2434
DJ02813	5.258	8.5274	10.2131	6.4147	7.243	8.3171	9.8968	7.2001	7.7598
DJ02814	83.4426	34.7507	64.3683	96.7839	112.323	108.922	78.6069	95.4165	75.8275
DJ02818	6.5527	3.9959	6.4337	5.4239	3.7445	4.44	3.8654	3.3182	3.9031
DJ02819	11.1769	32.9646	9.025	3.5325	1.0229	2.3477	4.5552	0.7527	2.4355
DJ02820	0.6809	0.4461	0.7075	0.529	0.31	0.336	0.7955	0.5817	1.0816
DJ02821	78.8229	45.1096	57.2744	17.5065	13.9248	21.518	17.3373	19.4906	22.515
DJ02822	5.477	3.3115	3.8289	9.3703	11.5438	12.2682	10.2824	12.1094	11.8492
DJ02823	70.2897	59.384	40.2949	13.1904	14.6718	18.7392	5.701	7.9497	7.355
DJ02824	0.3348	0.192	0.3479	0.1214	0.1778	0.1285	0.1997	0.0834	0.0931
DJ02825	0.3454	0.2347	0.6979	0.1879	0.1529	0.2209	0.255	0.1721	0.2347
DJ02826	347.98	177.525	572.504	456.891	760.703	707.51	762.453	737.597	657.153
DJ02827	38.7324	26.4412	25.4359	80.1197	85.841	90.3991	45.1894	92.0267	61.9968
DJ02828	2.7766	1.4496	1.9705	0.3683	0	0.7018	0.4846	0.135	0.0753
DJ02829	40.6419	37.3753	45.3856	37.612	38.6305	39.3906	47.2133	42.2023	45.1056
DJ02830	25.4685	16.8291	26.9349	18.075	22.3364	20.0267	21.0587	20.3611	19.585
DJ02831	35.0205	32.3538	44.8891	51.4096	56.2945	57.7882	57.4626	59.8687	53.6986
DJ02832	10.7963	21.0979	5.8202	0.6413	0.7046	1.0606	0.6781	0.2938	1.0244
DJ02833	9.2067	9.5543	7.0104	32.5625	39.6616	36.2098	25.2881	45.461	27.3805
DJ02834	1.1634	2.5027	0.7873	2.0603	0.97	1.2772	0.9405	0.9978	1.0531
DJ02837	14.3298	19.7684	12.7516	40.5829	46.1265	47.221	41.1709	37.4315	39.7469
DJ02838	117.995	148.729	115.881	120.352	119.273	122.643	142.66	147.384	146.704
DJ02840	8.8961	12.5945	8.2391	53.5317	69.9984	69.2847	33.8234	84.0092	41.753
DJ02841	79.1309	57.7497	73.307	2.0101	2.9444	2.7533	1.4446	1.9502	1.8131
DJ02842	24.3128	35.8651	23.5874	66.4293	76.8007	71.1853	50.2939	50.9283	49.955
DJ02843	0.5899	10.9363	1.0728	0.4011	0.5288	0.6792	0.3016	0.588	0.738
DJ02844	17.2157	11.3387	13.0109	27.8589	33.3832	33.3772	32.1819	31.4473	28.5191
DJ02845	2.4927	2.8082	3.272	1.8553	1.4633	2.5679	0.6706	0.3923	1.1671
DJ02846	1.6088	1.5473	1.9954	0.3952	0.951	1.2548	0.5836	0.3621	0.5771
DJ02849	0	0	0	0	0	0	0	0	0.1743
DJ02850	0.3733	0.6777	1.0668	1.3197	1.3383	1.5043	1.9558	1.4418	1.2453
DJ02851	0.0353	0.027	0.0367	0	0.1405	0.1625	0.0721	0	0.1177
DJ02852	43.9448	21.0119	35.7036	11.5741	8.9184	10.2086	10.5375	10.4394	11.6471
DJ02853	3.8445	15.589	4.8635	9.6369	2.9298	5.3887	2.5632	1.0829	1.8588
DJ02855	40.2328	52.3035	46.9935	51.5716	42.364	45.5904	42.0862	38.9921	45.4701
DJ02856	1.1115	7.2532	3.2114	4.6003	1.9438	1.3421	16.5176	33.3431	16.3091
DJ02857	7.4493	4.2171	6.9042	5.0373	5.0046	5.7025	5.3515	3.6924	4.836
DJ02858	3.6627	2.0391	4.344	0.9961	1.7128	2.5211	1.9129	0.6349	0.9297
DJ02859	34.4067	37.0836	54.375	33.7222	40.6572	41.1052	65.6831	54.5996	59.3247
DJ02860	13.9118	10.4654	17.9766	12.2822	7.5016	11.4212	7.9151	7.2146	8.4527
DJ02861	22.1551	26.0843	24.1598	0.2975	0.5993	0.6298	2.1671	1.7721	1.825
DJ02862	93.7428	94.2046	71.9977	81.2684	64.2751	63.5899	64.0754	57.7531	63.9406
DJ02863	29.1697	16.2173	27.6146	21.0124	27.3987	24.5219	22.2302	17.6395	19.2766
DJ02864	1.3146	1.3108	0.8315	0.0622	0.0911	0.1974	0.0584	0.1139	0.3178
DJ02867	18.2569	7.1466	16.1737	4.4031	5.3163	5.7718	4.8652	4.6591	4.972
DJ02868	1.9317	1.7208	3.1769	1.5222	2.4357	2.3291	2.8922	2.5621	2.8585
DJ02870	2.6368	3.5009	2.7401	4.4534	5.5283	3.2756	6.3135	7.8154	5.7101
DJ02871	10.4876	14.0303	9.4043	9.8445	5.9972	7.4983	7.0902	5.1424	5.7373
DJ02872	5.2399	3.8183	5.4843	2.5834	2.8232	3.3637	3.7768	3.1374	3.5004
DJ02873	10.1114	7.0026	9.0509	2.8315	3.8285	4.1496	2.7634	2.5445	2.2823
DJ02875	0.3317	0.1658	0.4507	0.3192	0.4675	0.2644	0.2087	0.3052	0.3547
DJ02876	2.1322	1.9891	1.3895	1.7298	2.0875	1.0194	1.4963	2.8637	1.8688
DJ02877	33.6462	33.0314	23.0207	46.3354	44.9454	59.8008	37.0883	58.0658	38.4405
DJ02879	3.829	8.3692	6.5431	22.9856	25.2409	40.6892	26.5603	32.3976	26.2417
DJ02881	0	0.0433	0	0	0	0	0	0	0
DJ02882	1.2576	0.8241	1.1824	1.1726	1.1451	0.8964	1.5918	2.0295	1.5983
DJ02883	0.3419	1.1108	1.5988	0.9298	0.9534	1.2794	1.5729	1.4483	1.2357
DJ02884	7.3814	6.2439	8.2768	7.6157	6.2649	7.6518	6.3274	5.3347	5.698
DJ02885	1.6449	1.1177	1.3928	1.0603	1.359	1.6834	2.1176	1.3359	2.0324
DJ02886	39.5481	45.5511	39.8759	78.8822	99.8163	79.4653	83.3254	73.4204	73.5819
DJ02887	38.3392	56.3839	54.639	51.2385	50.3273	43.5119	46.661	47.6767	47.3044
DJ02889	12.931	10.1024	12.9945	9.236	8.2079	8.7939	10.3506	10.5165	11.0614
DJ02890	0.8818	0.7805	0.7476	1.969	1.7934	2.2978	2.0877	1.1796	1.858
DJ02891	2.717	15.5776	3.9565	8.05	6.551	7.3679	11.6223	10.3337	8.6866
DJ02892	41.0033	20.5415	23.2159	124.208	98.1581	79.753	153.267	273.892	136.706
DJ02893	1.3487	1.2667	2.0022	2.8923	3.0086	3.1944	3.5061	3.764	2.2711
DJ02894	3.3119	3.9541	3.4029	4.898	4.0617	5.1842	3.6902	4.08	3.476
DJ02895	13.5299	13.633	11.2479	11.2698	14.4753	12.314	11.4608	9.7868	9.9446
DJ02897	4.5647	18.8961	20.5404	19.2533	23.8794	18.5933	18.0063	15.8816	16.3779
DJ02898	4.7011	11.7901	7.7136	1.9289	1.6099	2.6589	1.5177	1.8497	3.0266
DJ02900	33.3851	25.1314	53.8125	12.6746	12.1584	13.0537	13.3955	15.3282	14.6147
DJ02901	0.3012	0.1645	0.626	0.5617	0.6171	0.5945	0.2639	0.386	0.335
DJ02902	1.3825	3.119	3.5041	2.5677	3.5193	4.193	2.9302	1.8485	2.4374
DJ02903	2.092	1.5459	1.9565	1.8964	1.6111	1.7663	1.6397	2.7802	2.4039
DJ02904	18.8212	30.3531	16.7345	26.7146	50.6388	22.829	36.0134	85.1216	42.3078
DJ02905	178.832	124.216	163.465	19.0902	20.8311	22.3325	18.4495	21.2454	20.8587
DJ02906	0.5223	1.6971	0.8142	3.5513	2.601	3.6085	2.937	5.9874	4.5018
DJ02907	13.7347	23.3715	14.9588	25.2603	28.8472	27.5472	27.4526	21.9608	26.5819
DJ02909	33.6459	33.0507	36.9298	22.8022	15.3472	17.352	21.1438	17.1431	20.1304
DJ02910	45.3147	20.3174	39.5538	2.4627	1.4957	2.098	2.6908	1.7795	2.4561
DJ02911	19.1122	22.7911	29.3471	58.652	42.7935	49.9544	37.5748	44.8131	42.8874
DJ02913	7.0034	4.763	8.0807	16.7341	15.3153	14.5698	15.7514	21.1342	20.6786
DJ02914	622.588	386.648	432.048	34.6458	21.1409	46.8809	29.3222	16.9776	30.056
DJ02915	16.655	10.5446	16.331	6.9682	9.1524	9.1455	10.3907	8.1301	8.3582
DJ02916	2.4757	3.4094	3.7834	7.1486	6.831	6.4345	7.2766	4.7175	6.6601
DJ02917	10.7229	11.693	11.2248	6.2182	6.7214	6.8992	6.126	8.0159	7.0581
DJ02918	24.738	22.3643	20.6215	15.0931	13.1109	14.9843	13.085	14.6872	14.3529
DJ02919	20.6746	18.7425	26.7957	3.5951	3.6128	4.1148	3.5751	6.2052	3.7606
DJ02922	13.9596	11.7505	14.9953	15.5266	18.7446	15.7716	18.9749	19.2816	18.8377
[truncated: 23,229 more rows]
