# Supplementary material for: Genome-wide identification and expression analysis of the LBD gene family in Jasminum sambac
Source: Research Square preprint supplement (doi:10.21203/rs.3.rs-7770306/v1), 2025-10-30
Supplement: Supplementary file 4 [file 1fec1d35ce7e5a1c2e67662e.xlsx]

## Sheet: Sheet1
Index	Compounds	Class	DJ1-1 (0 h, ng/g, FW)	DJ1-2 (0 h, ng/g, FW)	DJ1-3 (0 h, ng/g, FW)	DJ3-1 (96 h, ng/g, FW)	DJ3-2 (96 h, ng/g, FW)	DJ3-3 (96 h, ng/g, FW)	Index	Compounds	Class	Pvalue	FDR	Fold_Change (96h / 0h)	Log2FC	Type
MEIAA	Methyl indole-3-acetate	Auxin	0.208547	0.543845	0.197657	0.488086	0.984698	0.787343	MEIAA	Methyl indole-3-acetate	Auxin	0.0798091	0.230038	2.37896	1.25033	up
iP9G	N6-Isopentenyl-adenine-9-glucoside	CK	15.719	8.42011	18.7062	39.5148	60.5116	45.432	iP9G	N6-Isopentenyl-adenine-9-glucoside	CK	0.0173911	0.0964968	3.39497	1.7634	up
IAA-Asp	Indole-3-acetyl-L-aspartic acid	Auxin	0.422874	0.700711	0.551032	3.5261	1.96992	1.74792	IAA-Asp	Indole-3-acetyl-L-aspartic acid	Auxin	0.077194	0.230038	4.32573	2.11294	up
cZROG	cis-Zeatin-O-glucoside riboside	CK	0.665947	0.490431	0.652171	2.43354	2.95372	2.89268	cZROG	cis-Zeatin-O-glucoside riboside	CK	0.00276557	0.0677564	4.57823	2.19479	up
iPRMP	N-6-iso-pentenyladenosine-5'-monophosphate	CK	34.7776	87.505	48.2497	19.0003	21.0047	14.8114	iPRMP	N-6-iso-pentenyladenosine-5'-monophosphate	CK	0.133127	0.284972	0.321443	-1.63737	down
2MeScZR	2-Methylthio-cis-zeatin riboside	CK	0.238414	0.442247	0.195691	1.13051	0.998125	1.40842	2MeScZR	2-Methylthio-cis-zeatin riboside	CK	0.00593277	0.0726765	4.03611	2.01297	up
TRA	Tryptamine	Auxin	3.91902	6.73744	3.1572	11.6492	8.99607	19.5511	TRA	Tryptamine	Auxin	0.0965486	0.241458	2.9099	1.54097	up
DHZROG	Dihydrozeatin-O-glucoside riboside	CK	0.75544	0.989573	1.06936	4.22557	2.94073	3.26457	DHZROG	Dihydrozeatin-O-glucoside riboside	CK	0.0177239	0.0964968	3.70629	1.88998	up
SA	Salicylic acid	SA	61.7676	73.5396	73.5058	128.491	167.042	142.549	SA	Salicylic acid	SA	0.013404	0.0964968	2.09796	1.06899	up
JA	Jasmonic acid	JA	1.76403	13.1881	5.83465	1.70173	1.98656	1.87978	JA	Jasmonic acid	JA	0.268391	0.424232	0.267867	-1.90041	down
IPA	3-Indolepropionic acid	Auxin	0	43.1743	17.0699	214.522	145.87	105.811	IPA	3-Indolepropionic acid	Auxin	0.0368679	0.150544	7.73857	2.95207	up
tZR	trans-Zeatin riboside	CK	0	1.97574	0.790355	2.59221	0	4.22601	tZR	trans-Zeatin riboside	CK	0.397066	0.526803	2.46493	1.30154	up
OPDA	cis(+)-12-Oxophytodienoic acid	JA	4.14225	7.45321	8.32727	0	0	9.30907	OPDA	cis(+)-12-Oxophytodienoic acid	JA	0.377946	0.526803	0.467259	-1.09771	down
2MeSiPR	2-Methylthio-N6-isopentenyladenosine	CK	0	0	0	7.22082	6.3958	8.33529	2MeSiPR	2-Methylthio-N6-isopentenyladenosine	CK	0.00584634	0.0726765	inf	inf	up
H2JA	Dihydrojasmonic acid	JA	0.467656	0.483298	0.419156	0.30986	0	0	H2JA	Dihydrojasmonic acid	JA	0.0711833	0.230038	0.226157	-2.1446	down
cZR	cis-Zeatin riboside	CK	0.230239	0.381621	0	1.06224	1.08496	2.55458	cZR	cis-Zeatin riboside	CK	0.103482	0.241458	7.68442	2.94194	up
IAA-Glu	Indole-3-acetyl glutamic acid	Auxin	0	0	0	1.51131	0	1.1975	IAA-Glu	Indole-3-acetyl glutamic acid	Auxin	0.188928	0.31397	inf	inf	up
DHZR	Dihydrozeatin ribonucleoside	CK	0	0	0	1.40369	0.818549	1.67051	DHZR	Dihydrozeatin ribonucleoside	CK	0.0356006	0.150544	inf	inf	up
2-Coumarate	2-Coumarate	SA	0	0	0	0	16.5436	12.2942	2-Coumarate	2-Coumarate	SA	0.192226	0.31397	inf	inf	up
ST	（±）Strigol	SL	0	0	0	64.8933	84.6613	103.596	ST	（±）Strigol	SL	0.0170851	0.0964968	inf	inf	up
IAA-Phe-Me	Indole-3-acetyl-L-phenylalanne methyle ester	Auxin	2.51908	2.97342	0	0	0	0	IAA-Phe-Me	Indole-3-acetyl-L-phenylalanne methyle ester	Auxin	0.186283	0.31397	0	-inf	down
IAA-Val	N-(3-Indolylacetyl)-L-valine	Auxin	0	0	0	0	1.34347	1.47137	IAA-Val	N-(3-Indolylacetyl)-L-valine	Auxin	0.184345	0.31397	inf	inf	up
OPC-6	3-oxo-2-(2-(Z)-Pentenyl)cyclopentane-1-hexanoic acid	JA	0	0	0	0	8.43522	10.5303	OPC-6	3-oxo-2-(2-(Z)-Pentenyl)cyclopentane-1-hexanoic acid	JA	0.18844	0.31397	inf	inf	up
OPC-4	3-oxo-2-(2-(Z)-Pentenyl) cyclopentane-1-butyric acid	JA	0	0	0	9.43757	0	12.0348	OPC-4	3-oxo-2-(2-(Z)-Pentenyl) cyclopentane-1-butyric acid	JA	0.189412	0.31397	inf	inf	up
JA-Phe	N-[(-)-Jasmonoyl]-(l)-phenalanine	JA	0.13159	0	0.155936	0	0	0	JA-Phe	N-[(-)-Jasmonoyl]-(l)-phenalanine	JA	0.186415	0.31397	0	-inf	down
