# Supplementary material for: Genome-wide identification and expression analysis of the LBD gene family in Jasminum sambac
Source: Research Square preprint supplement (doi:10.21203/rs.3.rs-7770306/v1), 2025-10-30
Supplement: Supplementary file 5 [file 6ada69310fd1812124e14520.xlsx]

## Sheet: Sheet1
Index	Compounds	Class	DJ1-1 (0 h, ng/g, FW)	DJ1-2 (0 h, ng/g, FW)	DJ1-3 (0 h, ng/g, FW)	DJ2-1 (48 h, ng/g, FW)	DJ2-2 (48 h, ng/g, FW)	DJ2-3 (48 h, ng/g, FW)	Index	Compounds	Class	Pvalue	FDR	Fold_Change (48h / 0h)	Log2FC	Type
iP9G	N6-Isopentenyl-adenine-9-glucoside	CK	15.719	8.42011	18.7062	39.6115	45.7837	35.433	iP9G	N6-Isopentenyl-adenine-9-glucoside	CK	0.00373612	0.0840626	2.8201	1.49575	up
IAA-Asp	Indole-3-acetyl-L-aspartic acid	Auxin	0.422874	0.700711	0.551032	5.19618	4.0825	3.74186	IAA-Asp	Indole-3-acetyl-L-aspartic acid	Auxin	0.0111934	0.119308	7.77524	2.95889	up
cZROG	cis-Zeatin-O-glucoside riboside	CK	0.665947	0.490431	0.652171	1.68403	1.35006	1.25222	cZROG	cis-Zeatin-O-glucoside riboside	CK	0.0133029	0.119308	2.37003	1.24491	up
2MeScZR	2-Methylthio-cis-zeatin riboside	CK	0.238414	0.442247	0.195691	0.58098	0.833318	0.828787	2MeScZR	2-Methylthio-cis-zeatin riboside	CK	0.0159077	0.119308	2.55957	1.3559	up
tZRMP	9-Ribosyl-trans-zeatin 5'-monophosphate	CK	4.03767	26.5925	6.61609	30.0283	60.3432	17.7063	tZRMP	9-Ribosyl-trans-zeatin 5'-monophosphate	CK	0.198426	0.373323	2.90171	1.5369	up
TRA	Tryptamine	Auxin	3.91902	6.73744	3.1572	18.8021	22.1752	18.2039	TRA	Tryptamine	Auxin	0.000841995	0.0378898	4.28425	2.09904	up
DHZROG	Dihydrozeatin-O-glucoside riboside	CK	0.75544	0.989573	1.06936	2.43904	2.62974	1.92916	DHZROG	Dihydrozeatin-O-glucoside riboside	CK	0.0110926	0.119308	2.4865	1.31412	up
JA	Jasmonic acid	JA	1.76403	13.1881	5.83465	3.83289	2.71512	2.42683	JA	Jasmonic acid	JA	0.359852	0.506042	0.431758	-1.21171	down
tZ	trans-Zeatin	CK	0.748204	1.07894	0.756834	3.41062	2.81618	1.80956	tZ	trans-Zeatin	CK	0.0536438	0.19408	3.11008	1.63695	up
IPA	3-Indolepropionic acid	Auxin	0	43.1743	17.0699	59.6527	71.1732	54.5955	IPA	3-Indolepropionic acid	Auxin	0.0646934	0.19408	3.07783	1.62191	up
tZR	trans-Zeatin riboside	CK	0	1.97574	0.790355	2.78717	4.93924	1.13816	tZR	trans-Zeatin riboside	CK	0.199592	0.373323	3.20473	1.6802	up
2MeSiPR	2-Methylthio-N6-isopentenyladenosine	CK	0	0	0	2.00106	1.08639	1.74019	2MeSiPR	2-Methylthio-N6-isopentenyladenosine	CK	0.0274095	0.154178	inf	inf	up
H2JA	Dihydrojasmonic acid	JA	0.467656	0.483298	0.419156	0	0	0.247267	H2JA	Dihydrojasmonic acid	JA	0.0391974	0.176388	0.180472	-2.47015	down
cZR	cis-Zeatin riboside	CK	0.230239	0.381621	0	0	0	0	cZR	cis-Zeatin riboside	CK	0.207402	0.373323	0	-inf	down
IAA-Glu	Indole-3-acetyl glutamic acid	Auxin	0	0	0	2.10852	0	1.01163	IAA-Glu	Indole-3-acetyl glutamic acid	Auxin	0.229716	0.397585	inf	inf	up
12-OH-JA	12-Hydroxyjasmonic acid	JA	36.2587	0	0	35.8165	37.7408	33.5758	12-OH-JA	12-Hydroxyjasmonic acid	JA	0.188709	0.373323	2.95468	1.563	up
IAA-Phe-Me	Indole-3-acetyl-L-phenylalanne methyle ester	Auxin	2.51908	2.97342	0	0	1.49024	0	IAA-Phe-Me	Indole-3-acetyl-L-phenylalanne methyle ester	Auxin	0.291643	0.437464	0.271322	-1.88192	down
JA-Phe	N-[(-)-Jasmonoyl]-(l)-phenalanine	JA	0.13159	0	0.155936	0	0	0	JA-Phe	N-[(-)-Jasmonoyl]-(l)-phenalanine	JA	0.186415	0.373323	0	-inf	down
MEJA	Methyl jasmonate	JA	0	0	0	0	37.6851	32.6644	MEJA	Methyl jasmonate	JA	0.185575	0.373323	inf	inf	up
