# Supplementary material for: Genome-wide identification and expression analysis of the LBD gene family in Jasminum sambac
Source: Research Square preprint supplement (doi:10.21203/rs.3.rs-7770306/v1), 2025-10-30
Supplement: Supplementary file 6 [file 7af2dd19ebbb82126836a834.xlsx]

## Sheet: Sheet1
	Gene Name	Original Gene ID	Amino Acids	Molecular weight (kDa)	Theoretical pI	Instability Index	Aliphatic Index	Grand Average of Hydropathicity	Subcellular localization
			（aa）
Hutou jasmine	HtLBD01	HT00490.t1	224	24567	9.28	81.94	68.84	-0.38	Nucleus
	HtLBD02	HT00610.t1	212	23744.5	4.68	68.3	80.09	-0.12	Extracellular
	HtLBD03	HT00901.t1	214	23158.8	8.56	52.85	73.46	-0.36	Nucleus
	HtLBD04	HT00929.t1	193	21098.8	5.06	65.95	90.05	-0.07	Nucleus
	HtLBD05	HT00930.t1	204	22112.1	5.02	57.95	83.28	0	Chloroplast
	HtLBD06	HT01086.t1	188	21174.8	5.66	48.95	72.13	-0.52	Nucleus
	HtLBD07	HT03824.t1	170	18921.6	6.05	53.5	94.06	-0.06	Nucleus
	HtLBD08	HT04921.t1	217	24208	6.04	48.99	65.25	-0.39	Nucleus
	HtLBD09	HT05423.t1	159	17920	5.92	55.83	68.68	-0.44	Nucleus
	HtLBD10	HT05898.t1	258	27181.6	6.53	36.25	83.26	-0.12	Chloroplast
	HtLBD11	HT06983.t1	293	32192.5	5.86	48.37	71.64	-0.63	Nucleus
	HtLBD12	HT07092.t1	197	21271.2	6.3	55.68	83.65	-0.03	Extracellular
	HtLBD13	HT07143.t1	313	34813	6.05	59.68	66.42	-0.58	Nucleus
	HtLBD14	HT09235.t1	182	19543.8	8.23	57.34	58.02	-0.45	Nucleus
	HtLBD15	HT09493.t1	152	17418.6	8.37	56.59	75.79	-0.37	Nucleus
	HtLBD16	HT10884.t1	228	25911.5	9.23	36.91	62.32	-0.8	Nucleus
	HtLBD17	HT12190.t1	217	23833.8	8.17	56.61	78.16	-0.41	Nucleus
	HtLBD18	HT13091.t1	210	22562.4	6.88	72.23	73.86	-0.2	Nucleus
	HtLBD19	HT13092.t1	256	26735	7.14	74.1	70.94	-0.17	Nucleus
	HtLBD20	HT16108.t1	206	22851.5	6.06	72.99	72.91	-0.42	Nucleus
	HtLBD21	HT16275.t1	316	35228.1	6.22	62.32	73.83	-0.63	Nucleus
	HtLBD22	HT16648.t1	166	18610.7	6.28	54.19	67.05	-0.54	Nucleus
	HtLBD23	HT17548.t1	264	30438.4	5.68	51.54	73.56	-0.75	Nucleus
	HtLBD24	HT17624.t1	154	16927.8	6.05	39.91	68.51	-0.42	Extracellular
	HtLBD25	HT17984.t1	194	21199.2	8.07	51.97	83.92	-0.16	Extracellular
	HtLBD26	HT20060.t1	181	20230.9	5.17	72.07	80.33	-0.24	Nucleus
	HtLBD27	HT20147.t1	192	21179	5.89	64.73	73.65	-0.22	Nucleus
	HtLBD28	HT21799.t1	203	21869.9	7.54	60.13	82.12	-0.12	Chloroplast
	HtLBD29	HT21954.t1	204	23638.1	5.34	60.53	74.12	-0.76	Nucleus
	HtLBD30	HT23403.t1	244	26512	7.6	41.84	83.2	-0.24	Mitochondrion
	HtLBD31	HT24365.t1	222	24849.3	6.29	46.54	59.77	-0.58	Nucleus
	HtLBD32	HT25085.t1	229	24688.9	6.22	71.21	88.69	-0.09	Nucleus
	HtLBD33	HT25728.t1	211	23376.7	8.14	71.79	77.16	-0.23	Nucleus
	HtLBD34	HT28587.t1	186	20480	5.58	61.23	73.44	-0.34	Nucleus
	HtLBD35	HT28767.t1	209	23142.1	8.42	64.45	76.65	-0.24	Nucleus
	HtLBD36	HT28768.t1	196	21461.7	6.27	54.12	63.88	-0.33	Nucleus
	HtLBD37	HT28804.t1	169	18713.9	6.99	65.74	60.06	-0.48	Nucleus
	HtLBD38	HT31399.t1	238	25811.2	5.67	62.69	69.37	-0.5	Nucleus
single-petal jasmine	SjLBD01	SJ22801.t1	204	23637.1	5.51	59.45	74.12	-0.76	Nucleus
	SjLBD02	SJ24279.t1	241	26097.4	6.52	42.59	82.61	-0.25	Mitochondrion
	SjLBD03	SJ25339.t1	222	24849.3	6.29	46.54	59.77	-0.58	Nucleus
	SjLBD04	SJ26061.t1	229	24688.9	6.22	71.21	88.69	-0.09	Nucleus
	SjLBD05	SJ26246.t1	452	50906.8	8.56	44.62	83.27	-0.29	Mitochondrion
	SjLBD06	SJ26702.t1	211	23345.7	8.45	70.41	79.48	-0.2	Nucleus
	SjLBD07	SJ00496.t1	224	24587.1	8.92	77.02	71.88	-0.29	Nucleus
	SjLBD08	SJ00614.t1	212	23779.5	4.61	67.23	78.25	-0.13	Extracellular
	SjLBD09	SJ00846.t1	188	21174.8	5.66	48.95	72.13	-0.52	Nucleus
	SjLBD10	SJ00970.t1	214	23158.8	8.56	52.85	73.46	-0.36	Nucleus
	SjLBD11	SJ00997.t1	196	21611.2	5.43	63.28	72.3	-0.34	Nucleus
	SjLBD12	SJ00998.t1	193	21070.8	5.06	65.51	89.07	-0.08	Nucleus
	SjLBD13	SJ00999.t1	204	22142.2	5.02	57.95	82.79	-0.01	Chloroplast
	SjLBD14	SJ01167.t1	188	21174.8	5.66	48.95	72.13	-0.52	Nucleus
	SjLBD15	SJ29572.t1	186	20480	5.58	61.23	73.44	-0.34	Nucleus
	SjLBD16	SJ29747.t1	196	21489.8	6.27	54.12	64.85	-0.32	Nucleus
	SjLBD17	SJ29784.t1	169	18713.9	6.99	65.74	60.06	-0.48	Nucleus
	SjLBD18	SJ07263.t1	293	32117.4	5.69	47.68	71.33	-0.62	Nucleus
	SjLBD19	SJ07371.t1	197	21302.1	5.65	61.66	83.65	-0.02	Extracellular
	SjLBD20	SJ07430.t1	313	34813	6.05	59.68	66.42	-0.58	Nucleus
	SjLBD21	SJ04032.t1	170	18922.5	6.05	51.69	94.06	-0.08	Nucleus
	SjLBD22	SJ05193.t1	217	24222	6.04	49.38	65.71	-0.38	Nucleus
	SjLBD23	SJ05696.t1	159	17920	5.92	55.83	68.68	-0.44	Nucleus
	SjLBD24	SJ06154.t1	258	27181.6	6.53	36.25	83.26	-0.12	Chloroplast
	SjLBD25	SJ12641.t1	217	23807.7	8.17	54.84	78.62	-0.4	Nucleus
	SjLBD26	SJ13614.t1	210	22562.4	6.88	72.23	73.86	-0.2	Nucleus
	SjLBD27	SJ13615.t1	254	26721.9	7.15	72.2	72.24	-0.18	Nucleus
	SjLBD28	SJ20629.t1	181	20200.9	5.17	72.07	80.88	-0.22	Nucleus
	SjLBD29	SJ20716.t1	192	21179	5.89	64.73	73.65	-0.22	Nucleus
	SjLBD30	SJ22647.t1	203	21869.9	7.54	60.13	82.12	-0.12	Chloroplast
	SjLBD31	SJ32368.t1	238	25738.1	5.67	59.09	69.37	-0.5	Nucleus
	SjLBD32	SJ18151.t1	264	30456.4	5.68	52.01	72.08	-0.75	Nucleus
	SjLBD33	SJ18210.t1	154	16927.8	6.05	39.91	68.51	-0.42	Extracellular
	SjLBD34	SJ09548.t1	180	19385.7	8.23	59.5	58.11	-0.46	Nucleus
	SjLBD35	SJ09804.t1	152	17418.6	8.37	56.59	75.79	-0.37	Nucleus
	SjLBD36	SJ11255.t1	228	25911.5	9.23	36.91	62.32	-0.8	Nucleus
	SjLBD37	SJ16728.t1	215	23886.7	5.86	72.4	75.3	-0.34	Nucleus
	SjLBD38	SJ16881.t1	315	35122	6.37	62.18	74.06	-0.62	Nucleus
	SjLBD39	SJ17258.t1	166	18610.7	6.28	54.19	67.05	-0.54	Nucleus
double-petal jasmine	DjLBD01	DJ00592.t1	212	23779.5	4.61	67.23	78.25	-0.13	Extracellular
	DjLBD02	DJ00886.t1	214	23158.8	8.56	52.85	73.46	-0.36	Nucleus
	DjLBD03	DJ00913.t1	193	21070.8	5.06	65.51	89.07	-0.08	Nucleus
	DjLBD04	DJ00914.t1	204	22142.2	5.02	57.95	82.79	-0.01	Chloroplast
	DjLBD05	DJ01079.t1	188	21174.8	5.66	48.95	72.13	-0.52	Nucleus
	DjLBD06	DJ24120.t1	222	24849.3	6.29	46.54	59.77	-0.58	Nucleus
	DjLBD07	DJ24825.t1	229	24688.9	6.22	71.21	88.69	-0.09	Nucleus
	DjLBD08	DJ25433.t1	211	23278.4	8.14	67.57	78.1	-0.2	Extracellular
	DjLBD09	DJ29341.t1	169	18713.9	6.99	65.74	60.06	-0.48	Nucleus
	DjLBD10	DJ29381.t1	196	21475.7	6.27	55.11	64.34	-0.32	Nucleus
	DjLBD11	DJ29555.t1	186	20480	5.58	61.23	73.44	-0.34	Nucleus
	DjLBD12	DJ30834.t1	238	25765.2	5.67	59.09	69.37	-0.51	Nucleus
	DjLBD13	DJ03799.t1	170	18922.5	6.05	51.69	94.06	-0.08	Nucleus
	DjLBD14	DJ04848.t1	217	24190	6.04	48.24	67.05	-0.37	Nucleus
	DjLBD15	DJ05353.t1	159	17920	5.92	55.83	68.68	-0.44	Nucleus
	DjLBD16	DJ05836.t1	258	27181.6	6.53	36.25	83.26	-0.12	Chloroplast
	DjLBD17	DJ06913.t1	293	32117.4	5.69	47.68	71.33	-0.62	Nucleus
	DjLBD18	DJ07014.t1	197	21301.2	6.3	57.04	83.65	-0.03	Extracellular
	DjLBD19	DJ07071.t1	313	34813	6.05	59.68	66.42	-0.58	Nucleus
	DjLBD20	DJ09137.t1	179	19328.6	8.23	59.08	58.44	-0.46	Nucleus
	DjLBD21	DJ09409.t1	152	17418.6	8.37	56.59	75.79	-0.37	Nucleus
	DjLBD22	DJ10816.t1	228	25884.5	9.23	36.91	62.32	-0.79	Nucleus
	DjLBD23	DJ12163.t1	217	23866.8	8.5	56.59	78.62	-0.41	Nucleus
	DjLBD24	DJ13094.t1	210	22532.3	6.88	71.82	74.33	-0.19	Nucleus
	DjLBD25	DJ13095.t1	256	26808	7.15	72.68	70.94	-0.19	Nucleus
	DjLBD26	DJ14701.t1	155	17416.6	6.82	51.46	71.81	-0.44	Nucleus
	DjLBD27	DJ15054.t1	315	35100	6.22	61.88	74.06	-0.62	Nucleus
	DjLBD28	DJ15208.t1	215	23886.7	5.86	72.4	75.3	-0.34	Nucleus
	DjLBD29	DJ17468.t1	264	30414.4	5.68	53.93	75.04	-0.74	Nucleus
	DjLBD30	DJ17531.t1	154	16970.8	6.05	40.88	67.86	-0.45	Extracellular
	DjLBD31	DJ17856.t1	195	21339.3	7.47	54.39	81.49	-0.16	Extracellular
	DjLBD32	DJ19876.t1	181	20230.9	5.17	72.07	80.33	-0.24	Nucleus
	DjLBD33	DJ19959.t1	192	21164.9	5.89	66.37	73.65	-0.21	Nucleus
	DjLBD34	DJ21554.t1	203	21869.9	7.54	60.13	82.12	-0.12	Chloroplast
	DjLBD35	DJ21716.t1	204	23637.1	5.51	59.45	74.12	-0.76	Nucleus
	DjLBD36	DJ23159.t1	241	26055.4	8.16	41.54	84.23	-0.26	Mitochondrion
