# Supplementary material for: Genome-wide identification and expression analysis of the LBD gene family in Jasminum sambac
Source: Research Square preprint supplement (doi:10.21203/rs.3.rs-7770306/v1), 2025-10-30
Supplement: Supplementary file 7 [file 7fa210378b76fcf9fb890b81.xlsx]

## Sheet: Sheet1
ID	DJ1-1 (0 h, FPKM)	DJ1-2 (0 h, FPKM)	DJ1-3 (0 h, FPKM)	DJ2-1 (48 h, FPKM)	DJ2-2 (48 h, FPKM)	DJ2-3 (48 h, FPKM)	DJ1-1 (0 h, COUNT)	DJ1-2 (0 h, COUNT)	DJ1-3 (0 h, COUNT)	DJ2-1 (48 h, COUNT)	DJ2-2 (48 h, COUNT)	DJ2-3 (48 h, COUNT)	log2FoldChange (48h / 0h)	pvalue	padj	regulated	chr	start	end	strand	gene_name	gene_description	KEGG	KEGG pathway	NR	Swissprot	Tremble	KOG	GO	Pfam	TF-Family	TF-Category	TF-Classification
DJ19726	9.9344	8.9505	11.3068	3863.55	3753.27	3116.9	84	99	92	30031	39833	22890	8.57433	0	0	up	GWHBFHJ00000012	3852045	3852984	-	DJ19726	--	--	--	pathogenesis-related STH-2-like [Olea europaea subsp. europaea]	FRA16_FRAAN RecName: Full=Major strawberry allergen Fra a 1.06 {ECO:0000305}; AltName: Full=Class 10 plant pathogenesis-related protein Fra a 1.06 {ECO:0000305}; Short=PR10-related protein Fra a 1.06 {ECO:0000305}; EC=3.1.27.- {ECO:0000269|PubMed:30572279}; AltName: Allergen=Fra a 1 {ECO:0000305};	A0A022QXI4_ERYGU RecName: Full=Bet_v_1 domain-containing protein {ECO:0000259|Pfam:PF00407};	--	GO:0010427,abscisic acid binding; GO:0004518,nuclease activity; GO:0004864,protein phosphatase inhibitor activity; GO:0038023,signaling receptor activity; GO:0009738,abscisic acid-activated signaling pathway; GO:0006952,defense response; GO:0009607,response to biotic stimulus; GO:0003674,molecular_function; GO:0005488,binding; GO:0008289,lipid binding; GO:0019840,isoprenoid binding; GO:0031406,ca…	PF00407.22:Pathogenesis-related protein Bet v 1 family	--	--	--
DJ22422	2.5897	2.7823	2.9821	1129.66	1259.09	1071.31	37	52	41	14837	22579	13294	8.78619	5.49204e-284	5.61094e-280	up	GWHBFHJ00000013	8774093	8774898	+	DJ22422	--	K26731 K+:H+ antiporter | (RefSeq) cation/H(+) antiporter 18-like isoform X1 (A)	--	dirigent protein 5-like [Olea europaea var. sylvestris]	DIR5_ARATH RecName: Full=Dirigent protein 5; Short=AtDIR5; Flags: Precursor;	A0A6I9SSN4_SESIN RecName: Full=Dirigent protein {ECO:0000256|RuleBase:RU363099};	--	GO:0048046,apoplast; GO:0042349,guiding stereospecific synthesis activity; GO:1901599,(-)-pinoresinol biosynthetic process; GO:0003674,molecular_function; GO:0030234,enzyme regulator activity; GO:0098772,molecular function regulator activity; GO:0006725,cellular aromatic compound metabolic process; GO:0008150,biological_process; GO:0008152,metabolic process; GO:0009058,biosynthetic process; GO:00…	PF03018.17:Dirigent-like protein	--	--	--
DJ05793	2.5486	3.9492	3.4358	1654.36	2166.27	1720.01	37	75	48	22079	39474	21688	9.20738	2.14596e-219	1.46161e-215	up	GWHBFHJ00000006	41323534	41324352	-	DJ05793	--	K09841 xanthoxin dehydrogenase [EC:1.1.1.288] | (RefSeq) xanthoxin dehydrogenase-like (A)	ko00906: Carotenoid biosynthesis; ko01100: Metabolic pathways; ko01110: Biosynthesis of secondary metabolites	(-)-isopiperitenol/(-)-carveol dehydrogenase, mitochondrial-like [Olea europaea var. sylvestris]	ISPD_MENPI RecName: Full=(-)-isopiperitenol/(-)-carveol dehydrogenase, mitochondrial; EC=1.1.1.223; EC=1.1.1.243; Flags: Precursor;	A0A6P6X9C4_COFAR SubName: Full=(-)-isopiperitenol/(-)-carveol dehydrogenase, mitochondrial-like isoform X1 {ECO:0000313|RefSeq:XP_027125639.1}; SubName: Full=LOW QUALITY PROTEIN: (-)-isopiperitenol/(-)-carveol dehydrogenase, mitochondrial-like {ECO:0000313|RefSeq:XP_027123909.1};	Reductases with broad range of substrate specificities	GO:0005739,mitochondrion; GO:0018459,carveol dehydrogenase activity; GO:0018458,isopiperitenol dehydrogenase activity; GO:0000166,nucleotide binding; GO:0031525,menthol biosynthetic process; GO:0003674,molecular_function; GO:0003824,catalytic activity; GO:0016491,oxidoreductase activity; GO:0016614,oxidoreductase activity, acting on CH-OH group of donors; GO:0016616,oxidoreductase activity, actin…	PF13561.9:Enoyl-(Acyl carrier protein) reductase	--	--	--
DJ04318	1.305	0.9976	1.4794	548.302	676.639	545.984	22	22	24	8497	14317	7994	8.98373	7.98497e-202	4.07892e-198	up	GWHBFHJ00000006	23972422	23973761	-	DJ04318	--	K19642 D-galacturonate reductase [EC:1.1.1.365] | (RefSeq) D-galacturonate reductase-like (A)	ko00053: Ascorbate and aldarate metabolism; ko01240: Biosynthesis of cofactors	D-galacturonate reductase-like [Olea europaea var. sylvestris]	GALUR_FRAAN RecName: Full=D-galacturonate reductase; Short=FaGalUR; EC=1.1.1.365; AltName: Full=Aldo-keto reductase 2;	A0A2G9GDT1_9LAMI SubName: Full=Aldo/keto reductase family protein {ECO:0000313|EMBL:PIN03439.1}; EC=1.1.1.365 {ECO:0000313|EMBL:PIN03439.1};	Aldo/keto reductase family proteins	GO:0102098,D-galacturonate reductase activity; GO:0019853,L-ascorbic acid biosynthetic process; GO:0003674,molecular_function; GO:0003824,catalytic activity; GO:0016491,oxidoreductase activity; GO:0016614,oxidoreductase activity, acting on CH-OH group of donors; GO:0016616,oxidoreductase activity, acting on the CH-OH group of donors, NAD or NADP as acceptor; GO:0005975,carbohydrate metabolic proc…	PF00248.24:Aldo/keto reductase family	--	--	--
DJ13584	5.7003	9.0909	10.928	4574.52	3780.98	3271.5	116	242	214	85576	96574	57822	8.92139	1.68006e-194	6.86575e-191	up	GWHBFHJ00000009	31588675	31590055	+	DJ13584	--	no KO assigned | (RefSeq) glucan endo-1,3-beta-glucosidase-like (A)	--	glucan endo-1,3-beta-glucosidase, acidic-like [Olea europaea subsp. europaea]	E13H_TOBAC RecName: Full=Glucan endo-1,3-beta-glucosidase, acidic isoform PR-Q'; EC=3.2.1.39; AltName: Full=(1->3)-beta-glucan endohydrolase; Short=(1->3)-beta-glucanase; AltName: Full=Beta-1,3-endoglucanase; AltName: Full=PR-35; Flags: Precursor;	Q68V46_OLEEU SubName: Full=Beta-1,3-glucanase {ECO:0000313|EMBL:CAH17549.1};	--	GO:0046658,anchored component of plasma membrane; GO:0048046,apoplast; GO:0042973,glucan endo-1,3-beta-D-glucosidase activity; GO:0005975,carbohydrate metabolic process; GO:0006952,defense response; GO:0003674,molecular_function; GO:0003824,catalytic activity; GO:0004553,hydrolase activity, hydrolyzing O-glycosyl compounds; GO:0008422,beta-glucosidase activity; GO:0015926,glucosidase activity; GO…	PF00332.21:Glycosyl hydrolases family 17	--	--	--
DJ26727	0.706	0.8831	1.3339	346.106	435.904	356.943	22	36	40	9915	17050	9661	8.7165	2.99531e-189	1.02005e-185	up	GWHBFHJ00000003	20352458	20354303	-	DJ26727	--	K00422 polyphenol oxidase [EC:1.10.3.1] | (RefSeq) aureusidin synthase-like (A)	ko00350: Tyrosine metabolism; ko00950: Isoquinoline alkaloid biosynthesis; ko01100: Metabolic pathways; ko01110: Biosynthesis of secondary metabolites	polyphenol oxidase, chloroplastic-like [Olea europaea subsp. europaea]	PPO_MALDO RecName: Full=Polyphenol oxidase, chloroplastic; Short=PPO; EC=1.10.3.1; AltName: Full=Catechol oxidase; Flags: Precursor;	A0A6I9UES7_SESIN SubName: Full=aureusidin synthase {ECO:0000313|RefSeq:XP_011096441.1};	--	GO:0009543,chloroplast thylakoid lumen; GO:0004097,catechol oxidase activity; GO:0046872,metal ion binding; GO:0046148,pigment biosynthetic process; GO:0003674,molecular_function; GO:0003824,catalytic activity; GO:0004497,monooxygenase activity; GO:0016491,oxidoreductase activity; GO:0016679,oxidoreductase activity, acting on diphenols and related substances as donors; GO:0016682,oxidoreductase a…	PF12143.11:Protein of unknown function (DUF_B2219)	--	--	--
novel.1260	0.8689	0.1533	0.9724	4413.12	4738.66	3857.98	13	3	14	60695	88984	50131	12.838	2.30786e-183	6.73666e-180	up	GWHBFHJ00000005	20882767	20883945	-	--	--	K20628 expansin | (RefSeq) expansin-B15-like (A)	--	hypothetical protein BUALT_Bualt12G0068400 [Buddleja alternifolia]	EGC_CITJA RecName: Full=EG45-like domain containing protein; AltName: Full=Blight-associated protein p12; AltName: Full=Plant natriuretic peptide; Short=PNP; Flags: Precursor;	A0A022RPU1_ERYGU RecName: Full=Expansin-like EG45 domain-containing protein {ECO:0000259|PROSITE:PS50842};	--	GO:0048046,apoplast; GO:0009627,systemic acquired resistance; GO:0006950,response to stress; GO:0006952,defense response; GO:0008150,biological_process; GO:0009605,response to external stimulus; GO:0009607,response to biotic stimulus; GO:0043207,response to external biotic stimulus; GO:0044419,biological process involved in interspecies interaction between organisms; GO:0050896,response to stimul…	PF03330.21:Lytic transglycolase	--	--	--
DJ12462	3.9098	4.768	6.1912	660.759	855.224	766.997	42	67	64	6525	11531	7156	7.36415	1.16568e-173	2.97728e-170	up	GWHBFHJ00000009	8522134	8522739	+	DJ12462	--	K25075 pterocarpan synthase [EC:4.2.1.139] | (RefSeq) dirigent protein 1 (A)	ko00943: Isoflavonoid biosynthesis; ko01100: Metabolic pathways; ko01110: Biosynthesis of secondary metabolites	Hypothetical predicted protein [Olea europaea subsp. europaea]	DIR21_ARATH RecName: Full=Dirigent protein 21; Short=AtDIR21; Flags: Precursor;	A0A6I9TXJ1_SESIN RecName: Full=Dirigent protein {ECO:0000256|RuleBase:RU363099};	--	GO:0005576,extracellular region; GO:0009699,phenylpropanoid biosynthetic process; GO:0006725,cellular aromatic compound metabolic process; GO:0008150,biological_process; GO:0008152,metabolic process; GO:0009058,biosynthetic process; GO:0009698,phenylpropanoid metabolic process; GO:0009987,cellular process; GO:0019438,aromatic compound biosynthetic process; GO:0019748,secondary metabolic process; …	PF03018.17:Dirigent-like protein	--	--	--
DJ07687	0.6797	1.7586	1.0323	1062.52	1233.02	1130.8	13	44	19	18682	29601	18785	10.0016	9.09481e-164	2.06482e-160	up	GWHBFHJ00000007	27163035	27166709	+	DJ07687	--	K08070 2-alkenal reductase [EC:1.3.1.74] | (RefSeq) NADPH-dependent oxidoreductase 2-alkenal reductase (A)	--	2-alkenal reductase (NADP(+)-dependent)-like [Olea europaea subsp. europaea]	AER_ARATH RecName: Full=NADPH-dependent oxidoreductase 2-alkenal reductase {ECO:0000303|PubMed:16299173}; Short=AtAER {ECO:0000303|PubMed:16299173}; EC=1.3.1.- {ECO:0000269|PubMed:10848984}; EC=1.3.1.74 {ECO:0000269|PubMed:12514241, ECO:0000269|PubMed:16299173, ECO:0000269|PubMed:17028190, ECO:0000269|PubMed:26678323}; AltName: Full=NADP-dependent alkenal double bond reductase P1 {ECO:0000303|Pub…	A0A2G9G1R9_9LAMI SubName: Full=Putative NAD-dependent oxidoreductase {ECO:0000313|EMBL:PIM99250.1}; EC=1.3.1.74 {ECO:0000313|EMBL:PIM99250.1};	Predicted NAD-dependent oxidoreductase	GO:0005829,cytosol; GO:0005654,nucleoplasm; GO:0005634,nucleus; GO:0009536,plastid; GO:0032440,2-alkenal reductase [NAD(P)+] activity; GO:0006979,response to oxidative stress; GO:0003674,molecular_function; GO:0003824,catalytic activity; GO:0016491,oxidoreductase activity; GO:0016627,oxidoreductase activity, acting on the CH-CH group of donors; GO:0016628,oxidoreductase activity, acting on the CH…	PF00107.29:Zinc-binding dehydrogenase	--	--	--
novel.2116	1.2192	1.8389	1.7806	344.867	501.436	402.159	37	73	52	9621	19100	10600	8.10116	2.08861e-160	4.26766e-157	up	GWHBFHJ00000008	2099342	2101250	-	--	--	K20617 cytochrome P450 family 71 subfamily A | (RefSeq) cytochrome P450 71A9-like (A)	--	cytochrome P450 71A6-like [Olea europaea var. sylvestris]	C7317_PRUMU RecName: Full=Cytochrome P450 736A117 {ECO:0000303|PubMed:25015725}; EC=1.14.-.- {ECO:0000305};	A0A6I9SRY0_SESIN SubName: Full=cytochrome P450 71A6-like {ECO:0000313|RefSeq:XP_011071980.1};	Cytochrome P450 CYP2 subfamily	GO:0016021,integral component of membrane; GO:0020037,heme binding; GO:0005506,iron ion binding; GO:0004497,monooxygenase activity; GO:0016705,oxidoreductase activity, acting on paired donors, with incorporation or reduction of molecular oxygen; GO:0003674,molecular_function; GO:0005488,binding; GO:0046906,tetrapyrrole binding; GO:0097159,organic cyclic compound binding; GO:1901363,heterocyclic c…	PF00067.25:Cytochrome P450	--	--	--
DJ13429	367.113	257.713	359.662	2.0297	2.8814	2.5461	15937	14635	15025	81	157	96	-6.93988	7.70655e-156	1.43153e-152	down	GWHBFHJ00000009	29949357	29959383	+	DJ13429	--	K12133 MYB-related transcription factor LHY | (RefSeq) protein LHY-like (A)	ko04712: Circadian rhythm - plant	LHY-like isoform X1 [Olea europaea subsp. europaea]	LHY_PETHY RecName: Full=Protein LATE ELONGATED HYPOCOTYL {ECO:0000303|PubMed:26124104}; Short=PhLHY {ECO:0000303|PubMed:26124104};	A0A8M8V2Y3_SESIN SubName: Full=protein LHY-like {ECO:0000313|RefSeq:XP_020553443.1};	Zuotin and related molecular chaperones (DnaJ superfamily), contains DNA-binding domains	GO:0005634,nucleus; GO:0000976,transcription cis-regulatory region binding; GO:0007623,circadian rhythm; GO:0010597,green leaf volatile biosynthetic process; GO:0045892,negative regulation of DNA-templated transcription; GO:0042752,regulation of circadian rhythm; GO:0001067,transcription regulatory region nucleic acid binding; GO:0003674,molecular_function; GO:0003676,nucleic acid binding; GO:000…	PF00249.34:Myb-like DNA-binding domain	MYB-related	TF	MYB->MYB-related
DJ24806	2.8391	3.4565	4.8625	288.133	321.404	347.523	54	86	89	5038	7673	5741	6.52471	1.88035e-154	3.20177e-151	up	GWHBFHJ00000002	14460786	14463766	+	DJ24806	--	K13265 vestitone reductase [EC:1.1.1.348] | (RefSeq) vestitone reductase (A)	ko00943: Isoflavonoid biosynthesis; ko01100: Metabolic pathways; ko01110: Biosynthesis of secondary metabolites	vestitone reductase-like [Olea europaea var. sylvestris]	VESTR_MEDSA RecName: Full=Vestitone reductase; EC=1.1.1.348 {ECO:0000269|PubMed:7625843, ECO:0000269|PubMed:8071365};	A0A6I9U278_SESIN SubName: Full=vestitone reductase isoform X2 {ECO:0000313|RefSeq:XP_011090658.1};	Flavonol reductase/cinnamoyl-CoA reductase	GO:0016491,oxidoreductase activity; GO:0006952,defense response; GO:0009813,flavonoid biosynthetic process; GO:0003674,molecular_function; GO:0003824,catalytic activity; GO:0006950,response to stress; GO:0008150,biological_process; GO:0050896,response to stimulus; GO:0008152,metabolic process; GO:0009058,biosynthetic process; GO:0009812,flavonoid metabolic process; GO:0071704,organic substance me…	PF01370.24:NAD dependent epimerase/dehydratase family	--	--	--
DJ22729	11.5276	10.7584	10.8312	634.074	489.023	477.093	480	586	434	24271	25558	17254	5.68172	2.61023e-146	4.10268e-143	up	GWHBFHJ00000013	14778022	14782238	+	DJ22729	--	K00276 primary-amine oxidase [EC:1.4.3.21] | (RefSeq) primary amine oxidase-like isoform X1 (A)	ko00260: Glycine, serine and threonine metabolism; ko00350: Tyrosine metabolism; ko00360: Phenylalanine metabolism; ko00410: beta-Alanine metabolism; ko00950: Isoquinoline alkaloid biosynthesis; ko00960: Tropane, piperidine and pyridine alkaloid biosynthesis; ko01100: Metabolic pathways; ko01110: Biosynthesis of secondary metabolites	primary amine oxidase-like isoform X1 [Olea europaea var. sylvestris]	CAOG1_ARATH RecName: Full=Amine oxidase [copper-containing] gamma 1 {ECO:0000303|PubMed:31862580}; Short=AtCuAO1 {ECO:0000303|PubMed:21471330, ECO:0000303|PubMed:23915037}; Short=AtCuAOgamma1 {ECO:0000303|PubMed:31862580}; Short=Copper amine oxidase 1 {ECO:0000303|PubMed:21471330}; EC=1.4.3.21 {ECO:0000269|PubMed:23915037}; AltName: Full=Primary amine oxidase 1 {ECO:0000305}; Flags: Precursor;	A0A2G9GBZ9_9LAMI RecName: Full=Amine oxidase {ECO:0000256|RuleBase:RU000672}; EC=1.4.3.- {ECO:0000256|RuleBase:RU000672};	Copper amine oxidase	GO:0005615,extracellular space; GO:0052595,aliphatic amine oxidase activity; GO:0052594,aminoacetone:oxygen oxidoreductase(deaminating) activity; GO:0005507,copper ion binding; GO:0052596,phenethylamine:oxygen oxidoreductase (deaminating) activity; GO:0008131,primary amine oxidase activity; GO:0048038,quinone binding; GO:0052593,tryptamine:oxygen oxidoreductase (deaminating) activity; GO:0009738,…	PF01179.23:Copper amine oxidase, enzyme domain	--	--	--
novel.2659	0.2151	0.2349	0.3193	111.838	121.519	130.613	7	10	10	3346	4964	3692	8.98506	1.44002e-144	2.10172e-141	up	GWHBFHJ00000009	25661747	25663693	+	--	--	K20513 ferruginol synthase [EC:1.14.14.175] | (RefSeq) ferruginol synthase-like (A)	ko00904: Diterpenoid biosynthesis; ko01110: Biosynthesis of secondary metabolites	ferruginol synthase-like [Olea europaea var. sylvestris]	CYT24_CATRO RecName: Full=Cytochrome P450 76T24 {ECO:0000303|PubMed:24710322}; Short=CrCYP76T24 {ECO:0000303|PubMed:24710322}; EC=1.14.-.- {ECO:0000305};	A0A1W7HBW0_SCODU SubName: Full=Cytochrome P450 {ECO:0000313|EMBL:BAX34738.1};	Cytochrome P450 CYP2 subfamily	GO:0016021,integral component of membrane; GO:0020037,heme binding; GO:0005506,iron ion binding; GO:0004497,monooxygenase activity; GO:0016705,oxidoreductase activity, acting on paired donors, with incorporation or reduction of molecular oxygen; GO:0003674,molecular_function; GO:0005488,binding; GO:0046906,tetrapyrrole binding; GO:0097159,organic cyclic compound binding; GO:1901363,heterocyclic c…	PF00067.25:Cytochrome P450	--	--	--
DJ12545	0.2145	0.1913	0.1486	259.779	284.996	268.454	6	7	4	6680	10006	6522	10.5962	2.46465e-144	3.35734e-141	up	GWHBFHJ00000009	9783049	9786284	-	DJ12545	--	K26385 lysine histidine transporter | (RefSeq) lysine histidine transporter-like 8 isoform X1 (A)	--	lysine histidine transporter-like 8 [Olea europaea subsp. europaea]	LHTL8_ARATH RecName: Full=Lysine histidine transporter-like 8; AltName: Full=Amino acid transporter-like protein 1;	A0A022RD99_ERYGU RecName: Full=Aa_trans domain-containing protein {ECO:0000259|Pfam:PF01490};	Amino acid transporters	GO:0016021,integral component of membrane; GO:0016020,membrane; GO:0005886,plasma membrane; GO:0015171,amino acid transmembrane transporter activity; GO:0003333,amino acid transmembrane transport; GO:0003674,molecular_function; GO:0005215,transporter activity; GO:0005342,organic acid transmembrane transporter activity; GO:0022857,transmembrane transporter activity; GO:0046943,carboxylic acid tran…	PF01490.21:Transmembrane amino acid transporter protein	--	--	--
DJ26010	4.6178	6.4051	4.7492	409.528	373.256	398.101	97	176	96	7908	9841	7263	6.29978	9.43651e-142	1.2051e-138	up	GWHBFHJ00000003	3057301	3058591	-	DJ26010	--	K08287 dual-specificity kinase [EC:2.7.12.1] | (RefSeq) serine/threonine-protein kinase AFC2-like (A)	--	cytochrome b561 and DOMON domain-containing protein At4g17280-like [Olea europaea var. sylvestris]	B561P_ARATH RecName: Full=Cytochrome b561 and DOMON domain-containing protein At5g35735; AltName: Full=Protein b561A.tha16; Flags: Precursor;	A0A022RW52_ERYGU RecName: Full=Cytochrome b561 and DOMON domain-containing protein {ECO:0000256|PIRNR:PIRNR037471};	Predicted membrane protein, contains DoH and Cytochrome b-561/ferric reductase transmembrane domains	GO:0016021,integral component of membrane; GO:0046872,metal ion binding; GO:0071456,cellular response to hypoxia; GO:0003674,molecular_function; GO:0005488,binding; GO:0043167,ion binding; GO:0043169,cation binding; GO:0001666,response to hypoxia; GO:0006950,response to stress; GO:0008150,biological_process; GO:0009628,response to abiotic stimulus; GO:0009987,cellular process; GO:0033554,cellular…	PF04526.16:Protein of unknown function (DUF568)	--	--	--
DJ17042	1.2894	1.6429	0.7816	382.229	438.882	490.237	24	40	14	6540	10253	7925	8.51489	1.19467e-141	1.43593e-138	up	GWHBFHJ00000011	2386049	2388757	+	DJ17042	--	K01456 peptide-N4-(N-acetyl-beta-glucosaminyl)asparagine amidase [EC:3.5.1.52] | (RefSeq) peptide-N(4)-(N-acetyl-beta- glucosaminyl)asparagine amidase isoform X1 (A)	ko04141: Protein processing in endoplasmic reticulum	auxin-induced protein PCNT115-like [Olea europaea var. sylvestris]	AKR2_ORYSJ RecName: Full=Probable aldo-keto reductase 2; EC=1.1.1.-;	A0A6P6WQP8_COFAR SubName: Full=auxin-induced protein PCNT115-like {ECO:0000313|RefSeq:XP_027117001.1};	Voltage-gated shaker-like K+ channel, subunit beta/KCNAB	GO:0005737,cytoplasm; GO:0004033,aldo-keto reductase (NADP) activity; GO:0003674,molecular_function; GO:0003824,catalytic activity; GO:0016491,oxidoreductase activity; GO:0016614,oxidoreductase activity, acting on CH-OH group of donors; GO:0016616,oxidoreductase activity, acting on the CH-OH group of donors, NAD or NADP as acceptor; GO:0005575,cellular_component; GO:0005622,intracellular anatomic…	PF00248.24:Aldo/keto reductase family	--	--	--
DJ18930	0.2918	0.2974	0.3706	296.642	431.476	267.911	9	12	11	8411	16704	7177	10.1254	1.84431e-141	2.0936e-138	up	GWHBFHJ00000011	33498228	33503197	+	DJ18930	--	K22277 glucan endo-1,6-beta-glucosidase [EC:3.2.1.75] | (RefSeq) probable glucan endo-1,6-beta-glucosidase B (A)	--	probable glucan 1,3-beta-glucosidase A [Olea europaea subsp. europaea]	--	A0A5B7BU40_DAVIN RecName: Full=Cellulase domain-containing protein {ECO:0000259|Pfam:PF00150};	--	GO:0005576,extracellular region; GO:0051015,actin filament binding; GO:0016985,mannan endo-1,4-beta-mannosidase activity; GO:0007015,actin filament organization; GO:0071704,organic substance metabolic process; GO:0003674,molecular_function; GO:0003779,actin binding; GO:0005488,binding; GO:0005515,protein binding; GO:0008092,cytoskeletal protein binding; GO:0044877,protein-containing complex bindi…	PF00150.21:Cellulase (glycosyl hydrolase family 5)	--	--	--
DJ05795	1.0458	2.043	2.1735	366.369	348.779	315.933	18	46	36	5797	7535	4723	7.70111	6.43347e-141	6.91868e-138	up	GWHBFHJ00000006	41328142	41329112	+	DJ05795	--	K09841 xanthoxin dehydrogenase [EC:1.1.1.288] | (RefSeq) xanthoxin dehydrogenase-like (A)	ko00906: Carotenoid biosynthesis; ko01100: Metabolic pathways; ko01110: Biosynthesis of secondary metabolites	(-)-isopiperitenol/(-)-carveol dehydrogenase, mitochondrial-like [Olea europaea var. sylvestris]	ISPD_MENPI RecName: Full=(-)-isopiperitenol/(-)-carveol dehydrogenase, mitochondrial; EC=1.1.1.223; EC=1.1.1.243; Flags: Precursor;	A0A2R6QGY1_ACTCC SubName: Full=(-)-isopiperitenol/(-)-carveol dehydrogenase {ECO:0000313|EMBL:PSS07877.1};	Reductases with broad range of substrate specificities	GO:0005739,mitochondrion; GO:0018459,carveol dehydrogenase activity; GO:0018458,isopiperitenol dehydrogenase activity; GO:0000166,nucleotide binding; GO:0031525,menthol biosynthetic process; GO:0003674,molecular_function; GO:0003824,catalytic activity; GO:0016491,oxidoreductase activity; GO:0016614,oxidoreductase activity, acting on CH-OH group of donors; GO:0016616,oxidoreductase activity, actin…	PF13561.9:Enoyl-(Acyl carrier protein) reductase	--	--	--
DJ09853	0.0752	0.2875	0.6253	1356.7	1512.2	1156.15	1	5	8	16581	25234	13350	12.1173	8.59166e-139	8.77767e-136	up	GWHBFHJ00000008	10286263	10288313	-	DJ09853	--	K20628 expansin | (RefSeq) expansin-B3 (A)	--	expansin-like B1 [Olea europaea var. sylvestris]	EXLB1_ARATH RecName: Full=Expansin-like B1; Short=At-EXPR1; Short=AtEXLB1; Short=AtEXPR1; AltName: Full=Ath-ExpBeta-3.1; Flags: Precursor;	A0A6I9SK31_SESIN SubName: Full=expansin-like B1 {ECO:0000313|RefSeq:XP_011070248.1};	--	GO:0005576,extracellular region; GO:0009653,anatomical structure morphogenesis; GO:0019953,sexual reproduction; GO:0008150,biological_process; GO:0032502,developmental process; GO:0048856,anatomical structure development; GO:0000003,reproduction; GO:0005575,cellular_component; GO:0110165,cellular anatomical entity	PF01357.24:Expansin C-terminal domain	--	--	--
DJ08161	702.536	397.48	729.078	3.1723	2.083	2.9331	20959	15512	20931	87	78	76	-7.70906	1.2339e-134	1.20059e-131	down	GWHBFHJ00000007	33941309	33943175	+	DJ08161	--	K20618 nepetalactol monooxygenase [EC:1.14.14.161] | (RefSeq) cytochrome P450 76A1-like (A)	ko00902: Monoterpenoid biosynthesis; ko01100: Metabolic pathways; ko01110: Biosynthesis of secondary metabolites	cytochrome P450 76A1-like [Olea europaea var. sylvestris]	IO_CATRO RecName: Full=Iridoid oxidase {ECO:0000303|PubMed:24710322}; Short=CrIO {ECO:0000303|PubMed:24710322}; EC=1.14.14.161 {ECO:0000269|PubMed:24710322}; AltName: Full=Cytochrome P450 76A26 {ECO:0000303|PubMed:24710322}; Short=CrCYP76A26 {ECO:0000303|PubMed:24710322};	A0A384XD78_OLEEU SubName: Full=Iridoid oxidase {ECO:0000313|EMBL:ATN39842.1};	Cytochrome P450 CYP2 subfamily	GO:0005783,endoplasmic reticulum; GO:0005789,endoplasmic reticulum membrane; GO:0016021,integral component of membrane; GO:0020037,heme binding; GO:0005506,iron ion binding; GO:0004497,monooxygenase activity; GO:0016705,oxidoreductase activity, acting on paired donors, with incorporation or reduction of molecular oxygen; GO:0035834,indole alkaloid metabolic process; GO:0009753,response to jasmoni…	PF00067.25:Cytochrome P450	--	--	--
DJ20053	4.2169	4.4423	6.9471	501.509	355.262	419.438	82	113	130	8965	8671	7084	6.4582	5.53721e-134	5.14281e-131	up	GWHBFHJ00000012	7027609	7029020	-	DJ20053	--	K13229 2,4-dihydroxy-1,4-benzoxazin-3-one-glucoside dioxygenase [EC:1.14.11.59] | (RefSeq) DIBOA-glucoside dioxygenase BX6 (A)	ko00402: Benzoxazinoid biosynthesis; ko00999: Biosynthesis of various plant secondary metabolites; ko01100: Metabolic pathways; ko01110: Biosynthesis of secondary metabolites	1-aminocyclopropane-1-carboxylate oxidase homolog 1-like [Olea europaea subsp. europaea]	ACCH1_ARATH RecName: Full=1-aminocyclopropane-1-carboxylate oxidase homolog 1;	A0A5H2Q8Y6_SCODU SubName: Full=2-oxoglutarate-dependent dioxygenase {ECO:0000313|EMBL:AYC63496.1};	Iron/ascorbate family oxidoreductases	GO:0046872,metal ion binding; GO:0016491,oxidoreductase activity; GO:0003674,molecular_function; GO:0005488,binding; GO:0043167,ion binding; GO:0043169,cation binding; GO:0003824,catalytic activity	PF03171.23:2OG-Fe(II) oxygenase superfamily	--	--	--
DJ25283	0.9402	1.4824	1.4045	426.117	357.55	272.124	16	33	23	6666	7637	4022	8.19079	6.7852e-130	6.02792e-127	up	GWHBFHJ00000002	25507117	25508502	+	DJ25283	--	K00430 peroxidase [EC:1.11.1.7] | (RefSeq) peroxidase N1-like (A)	ko00940: Phenylpropanoid biosynthesis; ko01100: Metabolic pathways; ko01110: Biosynthesis of secondary metabolites	peroxidase [Dorcoceras hygrometricum]	PERN1_TOBAC RecName: Full=Peroxidase N1; EC=1.11.1.7; AltName: Full=Peroxidase B2; AltName: Full=Peroxidase B3; Flags: Precursor;	A0A2Z7BEK3_9LAMI RecName: Full=Peroxidase {ECO:0000256|ARBA:ARBA00012313, ECO:0000256|RuleBase:RU362060}; EC=1.11.1.7 {ECO:0000256|ARBA:ARBA00012313, ECO:0000256|RuleBase:RU362060};	--	GO:0005576,extracellular region; GO:0009505,plant-type cell wall; GO:0020037,heme binding; GO:0046872,metal ion binding; GO:0004601,peroxidase activity; GO:0042744,hydrogen peroxide catabolic process; GO:0006979,response to oxidative stress; GO:0003674,molecular_function; GO:0005488,binding; GO:0046906,tetrapyrrole binding; GO:0097159,organic cyclic compound binding; GO:1901363,heterocyclic compo…	PF00141.26:Peroxidase	--	--	--
DJ18931	0.3585	0.3737	0.2371	159.71	204.604	148.967	11	15	7	4505	7880	3970	9.11888	2.215e-129	1.88579e-126	up	GWHBFHJ00000011	33525509	33528341	+	DJ18931	--	K22277 glucan endo-1,6-beta-glucosidase [EC:3.2.1.75] | (RefSeq) probable glucan endo-1,6-beta-glucosidase B (A)	--	probable glucan 1,3-beta-glucosidase A [Olea europaea subsp. europaea]	--	A0A5B7BU40_DAVIN RecName: Full=Cellulase domain-containing protein {ECO:0000259|Pfam:PF00150};	--	GO:0005576,extracellular region; GO:0051015,actin filament binding; GO:0016985,mannan endo-1,4-beta-mannosidase activity; GO:0007015,actin filament organization; GO:0071704,organic substance metabolic process; GO:0003674,molecular_function; GO:0003779,actin binding; GO:0005488,binding; GO:0005515,protein binding; GO:0008092,cytoskeletal protein binding; GO:0044877,protein-containing complex bindi…	PF00150.21:Cellulase (glycosyl hydrolase family 5)	--	--	--
DJ04506	0.1385	0.3706	0.1799	281.52	414.387	313.479	4	14	5	7473	15019	7862	10.5466	2.95737e-124	2.41712e-121	up	GWHBFHJ00000006	27179586	27183057	+	DJ04506	--	K22425 oleuropein beta-glucosidase [EC:3.2.1.206] | (RefSeq) beta-glucosidase (A)	--	beta-glucosidase-like [Olea europaea subsp. europaea]	BGLC_OLEEU RecName: Full=Oleuropein beta-glucosidase {ECO:0000305}; EC=3.2.1.206 {ECO:0000269|PubMed:25697790}; AltName: Full=Beta-glucosidase {ECO:0000303|PubMed:25697790}; Short=OeGLU {ECO:0000303|PubMed:25697790};	A0A6I9T407_SESIN SubName: Full=beta-glucosidase-like {ECO:0000313|RefSeq:XP_011077708.1};	Beta-glucosidase, lactase phlorizinhydrolase, and related proteins	GO:0005634,nucleus; GO:0008422,beta-glucosidase activity; GO:0043621,protein self-association; GO:0005975,carbohydrate metabolic process; GO:0006952,defense response; GO:0051259,protein complex oligomerization; GO:0003674,molecular_function; GO:0003824,catalytic activity; GO:0004553,hydrolase activity, hydrolyzing O-glycosyl compounds; GO:0015926,glucosidase activity; GO:0016787,hydrolase activit…	PF00232.21:Glycosyl hydrolase family 1	--	--	--
DJ05500	40.8194	37.2818	38.1288	984.367	806.704	876.771	267	319	240	5919	6623	4981	4.60681	3.5675e-124	2.80364e-121	up	GWHBFHJ00000006	38783884	38784252	-	DJ05500	--	K17278 membrane-associated progesterone receptor component | (RefSeq) membrane steroid-binding protein 2-like (A)	--	membrane steroid-binding 2-like [Olea europaea subsp. europaea]	MSBP2_ARATH RecName: Full=Membrane steroid-binding protein 2; Short=AtMP2; AltName: Full=Membrane-associated progesterone-binding protein 3 {ECO:0000303|Ref.5}; Short=AtMAPR3 {ECO:0000303|Ref.5};	A0A2C9UI66_MANES RecName: Full=Cytochrome b5 heme-binding domain-containing protein {ECO:0000259|SMART:SM01117};	Putative steroid membrane receptor Hpr6.6/25-Dx	GO:0009535,chloroplast thylakoid membrane; GO:0005829,cytosol; GO:0012505,endomembrane system; GO:0005783,endoplasmic reticulum; GO:0016021,integral component of membrane; GO:0016020,membrane; GO:0005886,plasma membrane; GO:0019904,protein domain specific binding; GO:0005496,steroid binding; GO:0003674,molecular_function; GO:0005488,binding; GO:0005515,protein binding; GO:0008289,lipid binding; G…	PF00173.31:Cytochrome b5-like Heme/Steroid binding domain	--	--	--
DJ11022	206.561	173.398	140.074	1.4444	1.4174	1.9147	16023	17595	10456	103	138	129	-6.69493	3.88447e-123	2.93968e-120	down	GWHBFHJ00000008	32997394	33002140	-	DJ11022	--	K03403 magnesium chelatase subunit H [EC:6.6.1.1] | (RefSeq) magnesium-chelatase subunit ChlH, chloroplastic-like (A)	ko00860: Porphyrin metabolism; ko01100: Metabolic pathways; ko01110: Biosynthesis of secondary metabolites	magnesium-chelatase subunit, chloroplastic [Olea europaea subsp. europaea]	CHLH_ARATH RecName: Full=Magnesium-chelatase subunit ChlH, chloroplastic; Short=Mg-chelatase subunit H; EC=6.6.1.1; AltName: Full=ABA-binding protein; AltName: Full=Mg-protoporphyrin IX chelatase subunit ChlH; AltName: Full=Protein CONDITIONAL CHLORINA; AltName: Full=Protein GENOMES UNCOUPLED 5; AltName: Full=Protein RAPID TRANSPIRATION IN DETACHED LEAVES 1; Flags: Precursor;	A0A2G9I491_9LAMI RecName: Full=Magnesium chelatase {ECO:0000256|ARBA:ARBA00012825}; EC=6.6.1.1 {ECO:0000256|ARBA:ARBA00012825};	--	GO:0009507,chloroplast; GO:0009706,chloroplast inner membrane; GO:0009570,chloroplast stroma; GO:0010007,magnesium chelatase complex; GO:0005739,mitochondrion; GO:0009536,plastid; GO:0005524,ATP binding; GO:0016851,magnesium chelatase activity; GO:0003729,mRNA binding; GO:0015995,chlorophyll biosynthetic process; GO:0015979,photosynthesis; GO:0000166,nucleotide binding; GO:0003674,molecular_funct…	PF02514.19:CobN/Magnesium Chelatase	--	--	--
DJ13057	0.1945	0.0991	0.3369	1508.99	2377.3	1442.99	3	2	5	21393	46017	19328	13.214	3.13259e-118	2.286e-115	up	GWHBFHJ00000009	24697963	24698832	-	DJ13057	--	K01051 pectinesterase [EC:3.1.1.11] | (RefSeq) pectinesterase 2 (A)	ko00040: Pentose and glucuronate interconversions; ko01100: Metabolic pathways	pectinesterase 2 [Olea europaea subsp. europaea]	PME17_ARATH RecName: Full=Probable pectinesterase/pectinesterase inhibitor 17; Includes: RecName: Full=Pectinesterase inhibitor 17; AltName: Full=Pectin methylesterase inhibitor 17; Includes: RecName: Full=Pectinesterase 17; Short=PE 17; EC=3.1.1.11; AltName: Full=Pectin methylesterase 17; Short=AtPME17; Flags: Precursor;	A0A5B6YIX0_DAVIN RecName: Full=Pectinesterase {ECO:0000256|ARBA:ARBA00013229, ECO:0000256|RuleBase:RU000589}; EC=3.1.1.11 {ECO:0000256|ARBA:ARBA00013229, ECO:0000256|RuleBase:RU000589};	--	GO:0005576,extracellular region; GO:0045330,aspartyl esterase activity; GO:0030599,pectinesterase activity; GO:0046910,pectinesterase inhibitor activity; GO:0042545,cell wall modification; GO:0050829,defense response to Gram-negative bacterium; GO:0045490,pectin catabolic process; GO:0009617,response to bacterium; GO:0009620,response to fungus; GO:0003674,molecular_function; GO:0003824,catalytic …	PF04043.18:Plant invertase/pectin methylesterase inhibitor	--	--	--
DJ03010	10.9252	15.2933	11.8324	574.755	529.01	575.08	379	694	395	18329	23034	17327	5.54133	9.97587e-118	7.02886e-115	up	GWHBFHJ00000006	540114	542070	+	DJ03010	--	K00021 hydroxymethylglutaryl-CoA reductase (NADPH) [EC:1.1.1.34] | (RefSeq) 3-hydroxy-3-methylglutaryl-coenzyme A reductase-like (A)	ko00900: Terpenoid backbone biosynthesis; ko01100: Metabolic pathways; ko01110: Biosynthesis of secondary metabolites	hydroxymethylglutaryl-CoA reductase [Osmanthus fragrans]	HMDH_CAMAC RecName: Full=3-hydroxy-3-methylglutaryl-coenzyme A reductase; Short=HMG-CoA reductase; EC=1.1.1.34;	A0A678PDB7_9LAMI RecName: Full=3-hydroxy-3-methylglutaryl coenzyme A reductase {ECO:0000256|RuleBase:RU361219}; Short=HMG-CoA reductase {ECO:0000256|RuleBase:RU361219}; EC=1.1.1.34 {ECO:0000256|RuleBase:RU361219};	3-hydroxy-3-methylglutaryl-CoA (HMG-CoA) reductase	GO:0005789,endoplasmic reticulum membrane; GO:0016021,integral component of membrane; GO:0004420,hydroxymethylglutaryl-CoA reductase (NADPH) activity; GO:0015936,coenzyme A metabolic process; GO:0008299,isoprenoid biosynthetic process; GO:0003674,molecular_function; GO:0003824,catalytic activity; GO:0016491,oxidoreductase activity; GO:0016614,oxidoreductase activity, acting on CH-OH group of dono…	PF00368.21:Hydroxymethylglutaryl-coenzyme A reductase	--	--	--
DJ27820	0.501	0.9192	0.9892	183.338	282.166	247.754	10	24	19	3364	7069	4295	8.29683	4.61708e-117	3.14469e-114	up	GWHBFHJ00000003	32127498	32128854	+	DJ27820	--	K05863 solute carrier family 25 (mitochondrial adenine nucleotide translocator), member 4/5/6/31 | (RefSeq) ADP,ATP carrier protein 1, mitochondrial-like (A)	--	ADP,ATP carrier 1, mitochondrial-like [Olea europaea subsp. europaea]	ADT3_ARATH RecName: Full=ADP,ATP carrier protein 3, mitochondrial; AltName: Full=ADP/ATP translocase 3; AltName: Full=Adenine nucleotide translocator 3; Short=ANT 3; Flags: Precursor;	A0A2G9HCF9_9LAMI RecName: Full=ADP/ATP translocase {ECO:0000256|RuleBase:RU368008}; AltName: Full=ADP,ATP carrier protein {ECO:0000256|RuleBase:RU368008};	Mitochondrial ADP/ATP carrier proteins	GO:0009941,chloroplast envelope; GO:0016021,integral component of membrane; GO:0016020,membrane; GO:0005743,mitochondrial inner membrane; GO:0005739,mitochondrion; GO:0005886,plasma membrane; GO:0005471,ATP:ADP antiporter activity; GO:0140021,mitochondrial ADP transmembrane transport; GO:1990544,mitochondrial ATP transmembrane transport; GO:0015865,purine nucleotide transport; GO:0000295,adenine …	PF00153.30:Mitochondrial carrier protein	--	--	--
DJ26366	0.2644	0.0253	0.2061	239.536	205.243	200.679	8	1	6	6663	7795	5274	10.5332	2.68143e-113	1.76741e-110	up	GWHBFHJ00000003	12089788	12093080	-	DJ26366	--	--	--	sodium/calcium exchanger NCL2-like [Olea europaea var. sylvestris]	NCL2_ORYSJ RecName: Full=Sodium/calcium exchanger NCL2 {ECO:0000305}; AltName: Full=Na(+)/Ca(2+)-exchange protein NCL2 {ECO:0000305}; AltName: Full=OsEFCAX2 {ECO:0000303|PubMed:24286292}; AltName: Full=Protein NCX-like 2 {ECO:0000305}; Short=OsNCL2 {ECO:0000305};	A0A6I9U9Z9_SESIN SubName: Full=uncharacterized protein LOC105175605 isoform X1 {ECO:0000313|RefSeq:XP_011096401.1};	--	GO:0016021,integral component of membrane; GO:0005886,plasma membrane; GO:0005774,vacuolar membrane; GO:0005509,calcium ion binding; GO:0015369,calcium:proton antiporter activity; GO:0070588,calcium ion transmembrane transport; GO:0006874,cellular calcium ion homeostasis; GO:0006814,sodium ion transport; GO:0003674,molecular_function; GO:0005488,binding; GO:0043167,ion binding; GO:0043169,cation …	PF01699.27:Sodium/calcium exchanger protein	--	--	--
DJ31833	3.1091	2.9176	3.1863	46.6958	43.7155	47.6713	145	178	143	2002	2559	1931	3.99514	6.84992e-111	4.37389e-108	up	GWHBFHJ00000284	21556	24186	+	DJ31833	--	K03327 multidrug resistance protein, MATE family | (RefSeq) protein DETOXIFICATION 34-like (A)	--	G-type lectin S-receptor-like serine/threonine-protein kinase At5g24080 [Olea europaea var. sylvestris]	Y5248_ARATH RecName: Full=G-type lectin S-receptor-like serine/threonine-protein kinase At5g24080; EC=2.7.11.1; Flags: Precursor;	A0A2G9G482_9LAMI RecName: Full=Non-specific serine/threonine protein kinase {ECO:0000256|ARBA:ARBA00012513}; EC=2.7.11.1 {ECO:0000256|ARBA:ARBA00012513};	--	GO:0016021,integral component of membrane; GO:0005886,plasma membrane; GO:0005524,ATP binding; GO:0005516,calmodulin binding; GO:0030246,carbohydrate binding; GO:0106310,protein serine kinase activity; GO:0004674,protein serine/threonine kinase activity; GO:0031625,ubiquitin protein ligase binding; GO:0006468,protein phosphorylation; GO:0048544,recognition of pollen; GO:0000166,nucleotide binding…	PF00069.28:Protein kinase domain	--	--	--
DJ00577	49.5146	48.2172	59.8238	0.5915	0.6227	0.8217	1457	1856	1694	16	23	21	-6.18681	2.66169e-110	1.64807e-107	down	GWHBFHJ00000001	4631692	4636282	-	DJ00577	--	K10615 E3 ubiquitin-protein ligase HERC4 [EC:2.3.2.26] | (RefSeq) probable E3 ubiquitin-protein ligase HERC4 isoform X1 (A)	ko04120: Ubiquitin mediated proteolysis	ultraviolet-B receptor UVR8 isoform X2 [Olea europaea var. sylvestris]	UVR8_ARATH RecName: Full=Ultraviolet-B receptor UVR8 {ECO:0000303|PubMed:12226503}; AltName: Full=Protein UV-B RESISTANCE 8 {ECO:0000303|PubMed:12226503}; AltName: Full=RCC1 domain-containing protein UVR8 {ECO:0000303|PubMed:12226503};	A0A6I9THN8_SESIN SubName: Full=ultraviolet-B receptor UVR8 isoform X2 {ECO:0000313|RefSeq:XP_011085017.1};	FOG: RCC1 domain	GO:0000785,chromatin; GO:0005829,cytosol; GO:0005634,nucleus; GO:0009536,plastid; GO:0003682,chromatin binding; GO:0005085,guanyl-nucleotide exchange factor activity; GO:0042802,identical protein binding; GO:0009881,photoreceptor activity; GO:0042803,protein homodimerization activity; GO:0009649,entrainment of circadian clock; GO:0009411,response to UV; GO:0010224,response to UV-B; GO:0003674,mol…	PF00415.21:Regulator of chromosome condensation (RCC1) repeat	--	--	--
DJ24722	0.5021	0.4387	0.4845	52.6672	64.3751	63.0118	14	16	13	1350	2253	1526	7.07552	5.98705e-110	3.59804e-107	up	GWHBFHJ00000002	12777866	12782224	-	DJ24722	--	K22324 aliphatic glucosinolate S-oxygenase [EC:1.14.13.237] | (RefSeq) FMO_GS-OX5; flavin-monooxygenase glucosinolate S-oxygenase 5 (A)	--	Flavin-containing monooxygenase FMO GS-OX5 [Olea europaea subsp. europaea]	GSXL3_ARATH RecName: Full=Flavin-containing monooxygenase FMO GS-OX-like 3; EC=1.8.-.-; AltName: Full=Flavin-monooxygenase glucosinolate S-oxygenase-like 3;	A0A4S4D1K4_CAMSI RecName: Full=Flavin-containing monooxygenase {ECO:0000256|RuleBase:RU361177}; EC=1.-.-.- {ECO:0000256|RuleBase:RU361177};	Flavin-containing monooxygenase	GO:0050660,flavin adenine dinucleotide binding; GO:0004499,N,N-dimethylaniline monooxygenase activity; GO:0050661,NADP binding; GO:0000166,nucleotide binding; GO:0003674,molecular_function; GO:0005488,binding; GO:0036094,small molecule binding; GO:0043167,ion binding; GO:0043168,anion binding; GO:0097159,organic cyclic compound binding; GO:1901265,nucleoside phosphate binding; GO:1901363,heterocy…	PF00743.22:Flavin-binding monooxygenase-like	--	--	--
DJ00014	413.39	216.333	358.732	1.7885	1.269	1.3606	8046	5508	6719	32	31	23	-7.71226	7.82243e-110	4.56674e-107	down	GWHBFHJ00000001	129618	130715	+	DJ00014	--	K17479 glutaredoxin domain-containing cysteine-rich protein 1 | (RefSeq) uncharacterized protein At5g39865 (A)	--	uncharacterized protein At5g39865 [Olea europaea var. sylvestris]	Y5986_ARATH RecName: Full=Uncharacterized protein At5g39865;	A0A5B7BMU2_DAVIN SubName: Full=Putative glutaredoxin domain-containing cysteine-rich protein 1 {ECO:0000313|EMBL:MPA69161.1};	Glutaredoxin-related protein	GO:0097573,glutathione oxidoreductase activity; GO:0003674,molecular_function; GO:0003824,catalytic activity; GO:0015035,protein-disulfide reductase activity; GO:0015036,disulfide oxidoreductase activity; GO:0016491,oxidoreductase activity; GO:0016667,oxidoreductase activity, acting on a sulfur group of donors; GO:0140096,catalytic activity, acting on a protein	PF00462.27:Glutaredoxin	--	--	--
DJ21066	2.8912	2.7216	4.6183	150.831	188.653	168.035	121	149	186	5803	9910	6108	5.74614	2.24367e-108	1.27347e-105	up	GWHBFHJ00000012	27603755	27610995	+	DJ21066	--	K10999 cellulose synthase A [EC:2.4.1.12] | (RefSeq) cellulose synthase A catalytic subunit 9 [UDP-forming]-like (A)	--	cellulose synthase-like protein G3 [Olea europaea var. sylvestris]	CSLG3_ARATH RecName: Full=Cellulose synthase-like protein G3; Short=AtCslG3; EC=2.4.1.-;	A0A6I9TES0_SESIN SubName: Full=cellulose synthase-like protein G3 {ECO:0000313|RefSeq:XP_011082331.1};	--	GO:0000139,Golgi membrane; GO:0016021,integral component of membrane; GO:0005886,plasma membrane; GO:0016760,cellulose synthase (UDP-forming) activity; GO:0051753,mannan synthase activity; GO:0071555,cell wall organization; GO:0030244,cellulose biosynthetic process; GO:0009833,plant-type primary cell wall biogenesis; GO:0003674,molecular_function; GO:0003824,catalytic activity; GO:0008194,UDP-gly…	PF03552.17:Cellulose synthase	--	--	--
DJ14497	314.572	229.909	265.217	5.6829	6.1276	7.6857	8671	8290	7035	144	212	184	-5.29042	6.67587e-108	3.68671e-105	down	GWHBFHJ00000009	39044513	39046960	+	DJ14497	--	K17525 chitinase domain-containing protein 1 | (RefSeq) rhodanese-like domain-containing protein 4, chloroplastic (A)	--	rhodanese-like domain-containing 4, chloroplastic [Olea europaea subsp. europaea]	STR4_ARATH RecName: Full=Rhodanese-like domain-containing protein 4, chloroplastic; AltName: Full=Protein THYLAKOID RHODANESE-LIKE {ECO:0000303|PubMed:19682289}; AltName: Full=Sulfurtransferase 4 {ECO:0000303|PubMed:17408957}; Short=AtStr4 {ECO:0000303|PubMed:17408957}; Flags: Precursor;	A0A2G9I9T5_9LAMI RecName: Full=Rhodanese domain-containing protein {ECO:0000259|PROSITE:PS50206};	--	GO:0009507,chloroplast; GO:0009941,chloroplast envelope; GO:0009534,chloroplast thylakoid; GO:0009535,chloroplast thylakoid membrane; GO:0098807,chloroplast thylakoid membrane protein complex; GO:0005829,cytosol; GO:0016021,integral component of membrane; GO:0009772,photosynthetic electron transport in photosystem II; GO:0006091,generation of precursor metabolites and energy; GO:0008150,biologica…	PF14159.9:CAAD domains of cyanobacterial aminoacyl-tRNA synthetase	--	--	--
novel.3351	0.0626	0.0266	0.0795	30.5056	46.4534	33.1212	9	5	11	4030	8379	4134	9.50298	1.4289e-106	7.68332e-104	up	GWHBFHJ00000011	33872767	33883459	+	--	--	K03006 DNA-directed RNA polymerase II subunit RPB1 [EC:2.7.7.6] | (RefSeq) LOW QUALITY PROTEIN: DNA-directed RNA polymerase II subunit RPB1-like (A)	ko03020: RNA polymerase; ko03420: Nucleotide excision repair	Retrovirus-related Pol polyprotein from transposon TNT 1-94 [Cajanus cajan]	POLX_TOBAC RecName: Full=Retrovirus-related Pol polyprotein from transposon TNT 1-94; Includes: RecName: Full=Protease; EC=3.4.23.-; Includes: RecName: Full=Reverse transcriptase; EC=2.7.7.49; Includes: RecName: Full=Endonuclease;	A0A151RCT9_CAJCA SubName: Full=Retrovirus-related Pol polyprotein from transposon TNT 1-94 {ECO:0000313|EMBL:KYP40337.1}; EC=1.2.1.27 {ECO:0000313|EMBL:KYP40337.1};	FOG: Transposon-encoded proteins with TYA, reverse transcriptase, integrase domains in various combinations	GO:0004190,aspartic-type endopeptidase activity; GO:0004519,endonuclease activity; GO:0003676,nucleic acid binding; GO:0003964,RNA-directed DNA polymerase activity; GO:0008270,zinc ion binding; GO:0015074,DNA integration; GO:0006508,proteolysis; GO:0003674,molecular_function; GO:0003824,catalytic activity; GO:0004175,endopeptidase activity; GO:0008233,peptidase activity; GO:0016787,hydrolase acti…	PF07727.17:Reverse transcriptase (RNA-dependent DNA polymerase)	--	--	--
DJ24805	4.7333	4.6153	8.3819	282.719	301.92	331.992	98	125	167	5381	7846	5970	5.80519	2.33936e-106	1.22565e-103	up	GWHBFHJ00000002	14447820	14450901	+	DJ24805	--	K13265 vestitone reductase [EC:1.1.1.348] | (RefSeq) vestitone reductase (A)	ko00943: Isoflavonoid biosynthesis; ko01100: Metabolic pathways; ko01110: Biosynthesis of secondary metabolites	vestitone reductase-like [Olea europaea var. sylvestris]	VESTR_MEDSA RecName: Full=Vestitone reductase; EC=1.1.1.348 {ECO:0000269|PubMed:7625843, ECO:0000269|PubMed:8071365};	A0A6I9U278_SESIN SubName: Full=vestitone reductase isoform X2 {ECO:0000313|RefSeq:XP_011090658.1};	Flavonol reductase/cinnamoyl-CoA reductase	GO:0016491,oxidoreductase activity; GO:0006952,defense response; GO:0009813,flavonoid biosynthetic process; GO:0003674,molecular_function; GO:0003824,catalytic activity; GO:0006950,response to stress; GO:0008150,biological_process; GO:0050896,response to stimulus; GO:0008152,metabolic process; GO:0009058,biosynthetic process; GO:0009812,flavonoid metabolic process; GO:0071704,organic substance me…	PF01370.24:NAD dependent epimerase/dehydratase family	--	--	--
DJ10914	280.304	240.727	373.493	4.6345	4.3892	6.6813	3816	4287	4893	58	75	79	-5.73917	3.15038e-105	1.60929e-102	down	GWHBFHJ00000008	31762090	31765778	-	DJ10914	--	K02636 cytochrome b6-f complex iron-sulfur subunit [EC:7.1.1.6] | (RefSeq) cytochrome b6-f complex iron-sulfur subunit 2, chloroplastic-like (A)	ko00195: Photosynthesis; ko01100: Metabolic pathways	cytochrome b6-f complex iron-sulfur subunit, chloroplastic [Olea europaea subsp. europaea]	UCRIA_TOBAC RecName: Full=Cytochrome b6-f complex iron-sulfur subunit 1, chloroplastic; EC=7.1.1.6; AltName: Full=Plastohydroquinone:plastocyanin oxidoreductase iron-sulfur protein 1; AltName: Full=Rieske iron-sulfur protein 1; Short=ISP 1; Short=RISP 1; Flags: Precursor;	A0A5B7B5R6_DAVIN RecName: Full=Plastoquinol--plastocyanin reductase {ECO:0000256|ARBA:ARBA00012952}; EC=7.1.1.6 {ECO:0000256|ARBA:ARBA00012952};	Ubiquinol cytochrome c reductase, subunit RIP1	GO:0009535,chloroplast thylakoid membrane; GO:0016021,integral component of membrane; GO:0005886,plasma membrane; GO:0051537,2 iron, 2 sulfur cluster binding; GO:0045158,electron transporter, transferring electrons within cytochrome b6/f complex of photosystem II activity; GO:0046872,metal ion binding; GO:0016491,oxidoreductase activity; GO:0009496,plastoquinol--plastocyanin reductase activity; G…	PF00355.29:Rieske [2Fe-2S] domain	--	--	--
DJ20032	12.8115	11.4533	13.4086	291.768	255.543	225.767	419	490	422	8772	10490	6413	4.45407	1.29478e-104	6.45274e-102	up	GWHBFHJ00000012	6796806	6801323	-	DJ20032	--	K08176 MFS transporter, PHS family, inorganic phosphate transporter | (RefSeq) inorganic phosphate transporter 1-4-like isoform X1 (A)	--	inorganic phosphate transporter 1-4-like isoform X4 [Olea europaea var. sylvestris]	PHT11_PETHY RecName: Full=Low affinity inorganic phosphate transporter 1 {ECO:0000303|PubMed:18315538, ECO:0000303|PubMed:19380421}; Short=PhPT1 {ECO:0000303|PubMed:18315538, ECO:0000303|PubMed:19380421}; Short=PhPht1;1 {ECO:0000303|PubMed:18315538}; AltName: Full=Arbuscular mycorrhiza-induced phosphate transporter PT1 {ECO:0000305}; Short=AM-induced phosphate transporter PT1 {ECO:0000305}; AltNa…	O22055_CATRO SubName: Full=Phosphate transporter {ECO:0000313|EMBL:BAA20522.1};	Inorganic phosphate transporter	GO:0016021,integral component of membrane; GO:0005886,plasma membrane; GO:0005315,inorganic phosphate transmembrane transporter activity; GO:0015293,symporter activity; GO:0009873,ethylene-activated signaling pathway; GO:0080187,floral organ senescence; GO:0006817,phosphate ion transport; GO:0009723,response to ethylene; GO:0003674,molecular_function; GO:0005215,transporter activity; GO:0015291,s…	PF00083.27:Sugar (and other) transporter	--	--	--
DJ26525	0.4949	0.1351	0.551	166.529	148.945	131.37	14	5	15	4331	5289	3228	8.71907	4.99772e-104	2.43139e-101	up	GWHBFHJ00000003	16707902	16709497	-	DJ26525	--	K22395 cinnamyl-alcohol dehydrogenase [EC:1.1.1.195] | (RefSeq) berberine bridge enzyme-like 13 (A)	ko00940: Phenylpropanoid biosynthesis; ko01100: Metabolic pathways; ko01110: Biosynthesis of secondary metabolites	berberine bridge enzyme-like 18 [Olea europaea subsp. europaea]	STOX_BERWI RecName: Full=Tetrahydroberberine oxidase {ECO:0000303|PubMed:3402447}; Short=THB oxidase {ECO:0000305}; EC=1.3.3.8 {ECO:0000269|PubMed:21327819, ECO:0000269|PubMed:3402447}; AltName: Full=(S)-tetrahydroprotoberberine oxidase {ECO:0000303|PubMed:21327819}; Short=BwSTOX {ECO:0000303|PubMed:21327819}; Flags: Precursor;	A0A8M8VCL5_SESIN SubName: Full=berberine bridge enzyme-like 18 {ECO:0000313|RefSeq:XP_020554265.1};	--	GO:0071949,FAD binding; GO:0050328,tetrahydroberberine oxidase activity; GO:0000166,nucleotide binding; GO:0003674,molecular_function; GO:0005488,binding; GO:0036094,small molecule binding; GO:0043167,ion binding; GO:0043168,anion binding; GO:0050660,flavin adenine dinucleotide binding; GO:0097159,organic cyclic compound binding; GO:1901265,nucleoside phosphate binding; GO:1901363,heterocyclic co…	PF01565.26:FAD binding domain	--	--	--
DJ00576	2.7379	2.99	2.6263	74.1641	86.7986	79.2248	91	130	84	2266	3621	2287	4.92917	2.56402e-102	1.21839e-99	up	GWHBFHJ00000001	4619152	4621728	-	DJ00576	--	K04733 interleukin-1 receptor-associated kinase 4 [EC:2.7.11.1] | (RefSeq) proline-rich receptor-like protein kinase PERK12 (A)	--	wall-associated receptor kinase-like 20 [Olea europaea subsp. europaea]	WAKLQ_ARATH RecName: Full=Wall-associated receptor kinase-like 20; EC=2.7.11.-; Flags: Precursor;	A0A6I9TIL5_SESIN SubName: Full=wall-associated receptor kinase-like 20 {ECO:0000313|RefSeq:XP_011085014.1};	Serine/threonine protein kinase	GO:0016021,integral component of membrane; GO:0005886,plasma membrane; GO:0005524,ATP binding; GO:0106310,protein serine kinase activity; GO:0004674,protein serine/threonine kinase activity; GO:0007166,cell surface receptor signaling pathway; GO:0006468,protein phosphorylation; GO:0000166,nucleotide binding; GO:0003674,molecular_function; GO:0005488,binding; GO:0017076,purine nucleotide binding; …	PF00069.28:Protein kinase domain	--	--	--
DJ02564	0.4223	0.5947	0.5775	50.5347	78.5217	67.2814	19	35	25	2090	4434	2629	7.03034	4.65062e-102	2.15968e-99	up	GWHBFHJ00000001	41458992	41462006	-	DJ02564	--	K04733 interleukin-1 receptor-associated kinase 4 [EC:2.7.11.1] | (RefSeq) G-type lectin S-receptor-like serine/threonine-protein kinase RKS1 (A)	--	G-type lectin S-receptor-like serine threonine-kinase At1g11300 [Olea europaea subsp. europaea]	SD113_ARATH RecName: Full=G-type lectin S-receptor-like serine/threonine-protein kinase SD1-13; EC=2.7.11.1; AltName: Full=Calmodulin-binding receptor-like protein kinase 1; AltName: Full=Receptor-like protein kinase 2; AltName: Full=S-domain-1 (SD1) receptor kinase 13; Short=SD1-13; Flags: Precursor;	A0A8M8V0D2_SESIN SubName: Full=G-type lectin S-receptor-like serine/threonine-protein kinase At1g11300 {ECO:0000313|RefSeq:XP_020552107.1};	--	GO:0005576,extracellular region; GO:0016021,integral component of membrane; GO:0005886,plasma membrane; GO:0005524,ATP binding; GO:0005516,calmodulin binding; GO:0030246,carbohydrate binding; GO:0004672,protein kinase activity; GO:0106310,protein serine kinase activity; GO:0004674,protein serine/threonine kinase activity; GO:0031625,ubiquitin protein ligase binding; GO:0071446,cellular response t…	PF07714.20:Protein tyrosine and serine/threonine kinase	--	--	--
DJ02092	0.2612	0.1426	0.504	222.942	130.407	189.703	7	5	13	5493	4387	4416	9.37111	7.33994e-102	3.33282e-99	up	GWHBFHJ00000001	35831418	35832929	+	DJ02092	--	K01593 aromatic-L-amino-acid/L-tryptophan decarboxylase [EC:4.1.1.28 4.1.1.105] | (RefSeq) tyrosine/DOPA decarboxylase 1-like (A)	ko00350: Tyrosine metabolism; ko00360: Phenylalanine metabolism; ko00380: Tryptophan metabolism; ko00901: Indole alkaloid biosynthesis; ko00950: Isoquinoline alkaloid biosynthesis; ko00965: Betalain biosynthesis; ko01100: Metabolic pathways; ko01110: Biosynthesis of secondary metabolites	tyrosine DOPA decarboxylase 1-like [Olea europaea subsp. europaea]	TYDC_PAPSO RecName: Full=Tyrosine decarboxylase {ECO:0000303|PubMed:23204519}; Short=PsTyDC {ECO:0000303|PubMed:23204519}; EC=4.1.1.25 {ECO:0000269|PubMed:23204519};	A0A0N9LAJ7_OLEEU SubName: Full=Putative tyrosine decarboxylase {ECO:0000313|EMBL:ALG62777.1}; EC=4.1.1.25 {ECO:0000313|EMBL:ALG62777.1};	Aromatic-L-amino-acid/L-histidine decarboxylase	GO:0030170,pyridoxal phosphate binding; GO:0004837,tyrosine decarboxylase activity; GO:0006520,cellular amino acid metabolic process; GO:0003674,molecular_function; GO:0005488,binding; GO:0019842,vitamin binding; GO:0036094,small molecule binding; GO:0043167,ion binding; GO:0043168,anion binding; GO:0070279,vitamin B6 binding; GO:0097159,organic cyclic compound binding; GO:1901363,heterocyclic co…	PF00282.22:Pyridoxal-dependent decarboxylase conserved domain	--	--	--
DJ01706	1.1397	0.4356	0.423	280.004	255.988	225.131	14	7	5	3162	3947	2402	8.68333	1.07862e-101	4.79117e-99	up	GWHBFHJ00000001	26525329	26526021	-	DJ01706	--	K15472 premnaspirodiene oxygenase [EC:1.14.14.151] | (RefSeq) cytochrome P450 71D7-like (A)	ko00909: Sesquiterpenoid and triterpenoid biosynthesis; ko01110: Biosynthesis of secondary metabolites	premnaspirodiene oxygenase-like [Olea europaea var. sylvestris]	C7D55_HYOMU RecName: Full=Premnaspirodiene oxygenase; Short=HPO; EC=1.14.14.151 {ECO:0000269|PubMed:17715131}; AltName: Full=Cytochrome P450 71D55;	A0A6I9TEV0_SESIN SubName: Full=premnaspirodiene oxygenase {ECO:0000313|RefSeq:XP_011082374.1};	Cytochrome P450 CYP2 subfamily	GO:0016021,integral component of membrane; GO:0020037,heme binding; GO:0005506,iron ion binding; GO:0004497,monooxygenase activity; GO:0016705,oxidoreductase activity, acting on paired donors, with incorporation or reduction of molecular oxygen; GO:0003674,molecular_function; GO:0005488,binding; GO:0046906,tetrapyrrole binding; GO:0097159,organic cyclic compound binding; GO:1901363,heterocyclic c…	PF00067.25:Cytochrome P450	--	--	--
DJ07720	41.7228	32.4337	48.4383	0.511	0.4423	0.6638	1954	1987	2183	22	26	27	-6.16034	1.92073e-101	8.35027e-99	down	GWHBFHJ00000007	27574439	27578042	-	DJ07720	--	K20890 xylan alpha-glucuronosyltransferase [EC:2.4.1.-] | (RefSeq) UDP-glucuronate:xylan alpha-glucuronosyltransferase 1-like (A)	--	uncharacterized protein LOC111404006 [Olea europaea var. sylvestris]	--	A0A8M8UZB8_SESIN SubName: Full=uncharacterized protein LOC105161922 {ECO:0000313|RefSeq:XP_020549395.1};	FOG: Ankyrin repeat	--	PF13962.9:Domain of unknown function	--	--	--
DJ21493	0.2506	0.4047	0.2478	31.9474	33.9884	27.3369	62	131	59	7267	10556	5875	6.76128	3.50887e-101	1.49368e-98	up	GWHBFHJ00000012	34969251	34983315	-	DJ21493	--	K01183 chitinase [EC:3.2.1.14] | (RefSeq) endochitinase EP3-like (A)	ko00520: Amino sugar and nucleotide sugar metabolism; ko01100: Metabolic pathways	endochitinase EP3-like [Olea europaea var. sylvestris]	CHI4_BRANA RecName: Full=Basic endochitinase CHB4; EC=3.2.1.14; Flags: Precursor;	A0A5B6Z0Q2_DAVIN SubName: Full=Putative endochitinase PR4 {ECO:0000313|EMBL:MPA37398.1}; EC=3.2.1.14 {ECO:0000313|EMBL:MPA37398.1}; Flags: Fragment;	Predicted chitinase	GO:0005615,extracellular space; GO:0008061,chitin binding; GO:0004568,chitinase activity; GO:0016998,cell wall macromolecule catabolic process; GO:0006032,chitin catabolic process; GO:0006952,defense response; GO:0000272,polysaccharide catabolic process; GO:0003674,molecular_function; GO:0005488,binding; GO:0097367,carbohydrate derivative binding; GO:0003824,catalytic activity; GO:0004553,hydrola…	PF00182.22:Chitinase class I	--	--	--
DJ11900	21.4246	10.5287	25.7334	9418.06	5401.66	4778.78	308	198	356	124465	97468	59668	8.52335	6.71998e-100	2.80223e-97	up	GWHBFHJ00000009	1401751	1402656	-	DJ11900	--	K13513 lysocardiolipin and lysophospholipid acyltransferase [EC:2.3.1.- 2.3.1.51] | (RefSeq) probable 1-acyl-sn-glycerol-3-phosphate acyltransferase 4 isoform X1 (A)	ko00561: Glycerolipid metabolism; ko00564: Glycerophospholipid metabolism; ko01100: Metabolic pathways; ko01110: Biosynthesis of secondary metabolites	pathogenesis-related protein 5-like [Olea europaea var. sylvestris]	CRJ35_CRYJA RecName: Full=Pathogenesis-related thaumatin-like protein 3.5 {ECO:0000305}; AltName: Allergen=Cry j 3.5 {ECO:0000303|PubMed:16203714}; Flags: Precursor;	A0A2U1L7J3_ARTAN SubName: Full=Thaumatin-like protein {ECO:0000313|EMBL:PWA44990.1};	--	GO:0006952,defense response; GO:0009737,response to abscisic acid; GO:0009607,response to biotic stimulus; GO:0006950,response to stress; GO:0008150,biological_process; GO:0050896,response to stimulus; GO:0009719,response to endogenous stimulus; GO:0009725,response to hormone; GO:0010033,response to organic substance; GO:0033993,response to lipid; GO:0042221,response to chemical; GO:0097305,respo…	PF00314.20:Thaumatin family	--	--	--
DJ17062	42.914	26.6198	40.3706	1231.76	1525.95	1516.78	1119	908	1013	29526	49942	34351	5.38116	2.01345e-99	8.22815e-97	up	GWHBFHJ00000011	2563386	2566494	+	DJ17062	--	K01456 peptide-N4-(N-acetyl-beta-glucosaminyl)asparagine amidase [EC:3.5.1.52] | (RefSeq) peptide-N(4)-(N-acetyl-beta- glucosaminyl)asparagine amidase isoform X1 (A)	ko04141: Protein processing in endoplasmic reticulum	auxin-induced protein PCNT115-like [Olea europaea var. sylvestris]	AKR2_ORYSJ RecName: Full=Probable aldo-keto reductase 2; EC=1.1.1.-;	A0A6P6WQP8_COFAR SubName: Full=auxin-induced protein PCNT115-like {ECO:0000313|RefSeq:XP_027117001.1};	Voltage-gated shaker-like K+ channel, subunit beta/KCNAB	GO:0005737,cytoplasm; GO:0004033,aldo-keto reductase (NADP) activity; GO:0003674,molecular_function; GO:0003824,catalytic activity; GO:0016491,oxidoreductase activity; GO:0016614,oxidoreductase activity, acting on CH-OH group of donors; GO:0016616,oxidoreductase activity, acting on the CH-OH group of donors, NAD or NADP as acceptor; GO:0005575,cellular_component; GO:0005622,intracellular anatomic…	PF00248.24:Aldo/keto reductase family	--	--	--
