# Supplementary material for: Genome-wide identification and expression analysis of the LBD gene family in Jasminum sambac
Source: Research Square preprint supplement (doi:10.21203/rs.3.rs-7770306/v1), 2025-10-30
Supplement: Supplementary file 8 [file 8fbcfee48fa8949156895ae2.xlsx]

## Sheet: Sheet1
Index	Compounds	Class	Ion mode	Formula	Index	Compounds	Class	Q1 (m/z, Da)	Q3 (m/z, Da)	Molecular weight (Da)	Ion mode	Ionization mode	Formula	DJ1-1 (0h,ng/g, FW)	DJ1-2 (0h,ng/g, FW)	DJ1-3 (0h,ng/g, FW)	DJ2-1 (48h,ng/g, FW)	DJ2-2 (48h,ng/g, FW)	DJ2-3 (48h,ng/g, FW)	DJ3-1 (96h,ng/g, FW)	DJ3-2 (96h,ng/g, FW)	DJ3-3 (96h,ng/g, FW)	MWXS243916b_R1 (0h,ng/g, FW)	MWXS243916b_R2 (48h,ng/g, FW)	MWXS243916b_R3 (96h,ng/g, FW)	cpd_ID	CAS	KEGG_map
MEIAA	Methyl indole-3-acetate	Auxin	Positive	C11H11NO2	MEIAA	Methyl indole-3-acetate	Auxin	190.171	130	189.079	Positive	[M+H]+	C11H11NO2	0.208547	0.543845	0.197657	0.418226	0.546276	0.496501	0.488086	0.984698	0.787343	0.771212	0.645496	0.585274	-	1912-33-0	-
iP9G	N6-Isopentenyl-adenine-9-glucoside	CK	Positive	C16H23N5O5	iP9G	N6-Isopentenyl-adenine-9-glucoside	CK	366.113	204.1	365.17	Positive	[M+H]+	C16H23N5O5	15.719	8.42011	18.7062	39.6115	45.7837	35.433	39.5148	60.5116	45.432	35.7096	35.1278	34.8992	-	83087-94-9	-
IAA-Asp	Indole-3-acetyl-L-aspartic acid	Auxin	Negative	C14H14N2O5	IAA-Asp	Indole-3-acetyl-L-aspartic acid	Auxin	288.929	131.9	290.09	Negative	[M-H]-	C14H14N2O5	0.422874	0.700711	0.551032	5.19618	4.0825	3.74186	3.5261	1.96992	1.74792	2.3484	2.34158	2.42272	-	2456-73-7	-
ICAld	Indole-3-carboxaldehyde	Auxin	Positive	C9H7NO	ICAld	Indole-3-carboxaldehyde	Auxin	146.1	91	145.053	Positive	[M+H]+	C9H7NO	2.65152	3.20651	2.72673	4.55432	4.76235	3.78266	5.79246	5.30328	4.97843	3.3638	4.37956	4.1451	C08493	487-89-8	-
JA-Val	N-[(-)-Jasmonoyl]-(L)-valine	JA	Negative	C17H27NO4	JA-Val	N-[(-)-Jasmonoyl]-(L)-valine	JA	308.049	116	309.194	Negative	[M-H]-	C17H27NO4	0.0356595	0.21791	0.0732671	0.172455	0.169554	0.119985	0.144607	0.1521	0.199689	0.182557	0.134901	0.152061	-	120303-51-7	-
IPR	N6-isopentenyladenosine	CK	Positive	C15H21N5O4	IPR	N6-isopentenyladenosine	CK	336.2	204.2	335.159	Positive	[M+H]+	C15H21N5O4	3.49772	4.18825	4.45478	2.7476	3.37573	1.564	2.87167	1.84918	1.92915	2.11392	2.20778	2.24552	C04432	7724-76-7	ko00908,ko01100,ko01110
cZ	cis-Zeatin	CK	Positive	C10H13N5O	cZ	cis-Zeatin	CK	220.3	136.1	219.112	Positive	[M+H]+	C10H13N5O	0.188882	0.196145	0.194462	0.195761	0.215113	0.188176	0.235925	0.300352	0.2986	0.249214	0.261506	0.229374	C15545	32771-64-5	ko00908,ko01100,ko01110
cZROG	cis-Zeatin-O-glucoside riboside	CK	Positive	C21H31N5O10	cZROG	cis-Zeatin-O-glucoside riboside	CK	514.142	382	513.207	Positive	[M+H]+	C21H31N5O10	0.665947	0.490431	0.652171	1.68403	1.35006	1.25222	2.43354	2.95372	2.89268	1.62199	1.72065	1.68154	-	125225-72-1	-
iPRMP	N-6-iso-pentenyladenosine-5'-monophosphate	CK	Positive	C15H22N5O7P	iPRMP	N-6-iso-pentenyladenosine-5'-monophosphate	CK	416	204.1	415.126	Positive	[M+H]+	C15H22N5O7P	34.7776	87.505	48.2497	41.8973	36.1116	23.6704	19.0003	21.0047	14.8114	27.804	25.6818	26.0228	-	20268-93-3	-
DZ	Dihydrozeatin	CK	Positive	C10H15N5O	DZ	Dihydrozeatin	CK	222	136.1	221.128	Positive	[M+H]+	C10H15N5O	1.57608	1.56289	1.18854	1.55255	1.23086	1.23392	1.49653	1.61884	1.60327	1.35793	1.37822	1.33999	C02029	14894-18-9	ko00908,ko01110,ko04075
tZ9G	trans-Zeatin-9-glucoside	CK	Positive	C16H23N5O6	tZ9G	trans-Zeatin-9-glucoside	CK	382	220.1	381.165	Positive	[M+H]+	C16H23N5O6	9.71561	9.01468	9.62079	10.6061	10.9367	9.09908	10.1873	9.13546	11.6972	7.8916	8.38838	8.64876	-	51255-96-0	-
tZOG	trans-Zeatin-O-glucoside	CK	Positive	C16H23N5O6	tZOG	trans-Zeatin-O-glucoside	CK	382.088	220.2	381.165	Positive	[M+H]+	C16H23N5O6	3.40637	3.05313	4.96527	4.60691	3.64983	4.39179	6.14442	3.47951	4.29476	4.10858	3.8631	3.8405	C03423	56329-06-7	ko00908,ko01110
BAP7G	N6-Benzyladenine-7-glucoside	CK	Positive	C18H21N5O5	BAP7G	N6-Benzyladenine-7-glucoside	CK	388.081	226.2	387.154	Positive	[M+H]+	C18H21N5O5	0.363277	0.687425	0.362174	0.31815	0.769782	0.770905	0.318846	0.33605	0.329241	0.546254	0.475682	0.387758	-	56159-42-3	-
GA29	Gibberellin A29	GA	Negative	C19H24O6	GA29	Gibberellin A29	GA	347.2	259.1	348.157	Negative	[M-H]-	C19H24O6	62.2598	55.6646	77.9452	59.3724	59.9961	63.153	60.4785	60.5876	62.2151	48.4684	58.453	63.013	C06096	29774-53-6	ko00904
2MeScZR	2-Methylthio-cis-zeatin riboside	CK	Positive	C16H23N5O5S	2MeScZR	2-Methylthio-cis-zeatin riboside	CK	397.974	266.1	397.142	Positive	[M+H]+	C16H23N5O5S	0.238414	0.442247	0.195691	0.58098	0.833318	0.828787	1.13051	0.998125	1.40842	0.772722	0.771858	0.714698	-	52049-48-6	-
tZRMP	9-Ribosyl-trans-zeatin 5'-monophosphate	CK	Positive	C15H22N5O8P	tZRMP	9-Ribosyl-trans-zeatin 5'-monophosphate	CK	432	220.1	431.121	Positive	[M+H]+	C15H22N5O8P	4.03767	26.5925	6.61609	30.0283	60.3432	17.7063	9.71699	10.189	10.9231	17.0927	14.5566	15.078	-	25615-16-1	-
cZ9G	cis-Zeatin-9-glucoside	CK	Positive	C16H23N5O6	cZ9G	cis-Zeatin-9-glucoside	CK	382.099	220.1	381.165	Positive	[M+H]+	C16H23N5O6	1.96803	1.15472	1.60039	2.56754	2.61775	2.69228	1.94669	3.13905	2.50927	2.16292	2.16952	2.12952	-	169565-72-4	-
cZRMP	cis-Zeatin riboside monophosphate	CK	Positive	C15H22N5O8P	cZRMP	cis-Zeatin riboside monophosphate	CK	432	220.2	431.121	Positive	[M+H]+	C15H22N5O8P	3.00592	7.18091	3.01227	4.7529	5.60811	3.52475	3.80744	4.8252	3.90843	4.09924	3.9737	3.82304	-	125225-71-0	-
DHZ7G	Dihydrozeatin-7-glucoside	CK	Positive	C16H25N5O6	DHZ7G	Dihydrozeatin-7-glucoside	CK	384.2	222.1	383.18	Positive	[M+H]+	C16H25N5O6	9.6952	6.5459	6.812	7.56061	7.5348	9.07036	8.06042	9.25321	8.53928	8.42336	8.52282	8.12332	-	91599-03-0	-
TRA	Tryptamine	Auxin	Positive	C10H12N2	TRA	Tryptamine	Auxin	161.102	144.1	160.1	Positive	[M+H]+	C10H12N2	3.91902	6.73744	3.1572	18.8021	22.1752	18.2039	11.6492	8.99607	19.5511	15.3883	13.2004	13.8733	C00398	61-54-1	ko00380,ko00901,ko01100,ko01110
pT9G	4-[[(9-beta-D-Glucopyranosyl-9H-purin-6-yl)amino]methyl]phenol	CK	Positive	C18H21N5O6	pT9G	4-[[(9-beta-D-Glucopyranosyl-9H-purin-6-yl)amino]methyl]phenol	CK	404.075	242.1	403.149	Positive	[M+H]+	C18H21N5O6	0.826958	0.788843	1.75955	1.36755	0.904511	1.39548	2.3293	1.13226	1.27464	1.39096	1.32876	1.33001	-	1046433-04-8	-
ABA	Abscisic acid	ABA	Negative	C15H20O4	ABA	Abscisic acid	ABA	263.1	153.1	264.136	Negative	[M-H]-	C15H20O4	55.6796	87.9577	50.7035	50.9711	27.3426	29.3709	47.938	66.3415	54.7191	53.2512	41.1604	43.221	C06082	21293-29-8	ko00906,ko01100,ko01110,ko04075
Phe	L-Phenylalanine	SA	Positive	C9H11NO2	Phe	L-Phenylalanine	SA	166.1	149.1	165.079	Positive	[M+H]+	C9H11NO2	7625.17	9725.46	12529.6	14385.9	9767.96	9532.14	11149.9	11941.4	10538.9	10209.2	9250.06	9108.32	C00079	63-91-2	ko00360,ko00400,ko00460,ko00470,ko00940,ko00960,ko00966,ko00970,ko00996,ko00999,ko01100,ko01110,ko01210,ko01230,ko02010
ACC	1-Aminocyclopropanecarboxylic acid	ETH	Positive	C4H7NO2	ACC	1-Aminocyclopropanecarboxylic acid	ETH	102.2	56	101.048	Positive	[M+H]+	C4H7NO2	31.1186	55.0684	65.0531	84.4271	64.9575	101.408	104.638	90.3333	98.9344	106.184	109.212	102.158	C01234	22059-21-8	ko00270,ko01100,ko01110
IP	N6-isopentenyladenine	CK	Positive	C10H13N5	IP	N6-isopentenyladenine	CK	204.3	136	203.117	Positive	[M+H]+	C10H13N5	0.239213	0.224384	0.227967	0.400076	0.344186	0.293123	0.33912	0.458965	0.301822	0.327328	0.285848	0.295834	-	2365-40-4	-
SAG	Salicylic acid 2-O-β-glucoside	SA	Negative	C13H16O8	SAG	Salicylic acid 2-O-β-glucoside	SA	299.2	137	300.085	Negative	[M-H]-	C13H16O8	12086.6	10698.7	11247	10947.3	12190.5	17833.8	10962.2	11353.9	9244.73	13055.6	11068.3	11729.8	-	10366-91-3	-
DHZROG	Dihydrozeatin-O-glucoside riboside	CK	Positive	C21H33N5O10	DHZROG	Dihydrozeatin-O-glucoside riboside	CK	516.128	222.1	515.223	Positive	[M+H]+	C21H33N5O10	0.75544	0.989573	1.06936	2.43904	2.62974	1.92916	4.22557	2.94073	3.26457	2.46892	2.44962	2.46232	-	62512-95-2	-
SA	Salicylic acid	SA	Negative	C7H6O3	SA	Salicylic acid	SA	137	93	138.032	Negative	[M-H]-	C7H6O3	61.7676	73.5396	73.5058	79.2151	74.3816	98.1791	128.491	167.042	142.549	115.416	102.305	106.692	C00805	69-72-7	ko00996,ko01100,ko01110,ko04075
OxIAA	2-oxindole-3-acetic acid	Auxin	Positive	C10H9NO3	OxIAA	2-oxindole-3-acetic acid	Auxin	192.14	146.1	191.058	Positive	[M+H]+	C10H9NO3	1373.92	980.035	1019.64	670.458	811.657	645.281	686.827	697.273	742.065	728.302	693.568	673.418	-	2971-31-5	-
TRP	L-tryptophan	Auxin	Positive	C11H12N2O2	TRP	L-tryptophan	Auxin	205.063	188.1	204.09	Positive	[M+H]+	C11H12N2O2	9980.29	12233.5	20598.7	15292	13074.2	19729.4	14846.9	17390.2	14603.4	16228.6	16415.1	16383.8	C00078	73-22-3	ko00260,ko00380,ko00400,ko00901,ko00966,ko00970,ko00996,ko00999,ko01100,ko01110,ko01210,ko01230,ko01240
JA-ILE	Jasmonoyl-L-isoleucine	JA	Negative	C18H29NO4	JA-ILE	Jasmonoyl-L-isoleucine	JA	322.4	129.7	323.21	Negative	[M-H]-	C18H29NO4	2.33953	34.0466	5.7922	14.3452	10.8463	8.13659	9.62577	9.2866	12.215	9.98294	9.54546	9.79546	C18699	120330-93-0	ko04075
JA	Jasmonic acid	JA	Negative	C12H18O3	JA	Jasmonic acid	JA	209.1	58.8	210.126	Negative	[M-H]-	C12H18O3	1.76403	13.1881	5.83465	3.83289	2.71512	2.42683	1.70173	1.98656	1.87978	2.75446	3.59222	3.10096	C08491	3572-66-5	ko00592,ko01100,ko01110,ko04075
tZ	trans-Zeatin	CK	Positive	C10H13N5O	tZ	trans-Zeatin	CK	220.2	136.1	219.112	Positive	[M+H]+	C10H13N5O	0.748204	1.07894	0.756834	3.41062	2.81618	1.80956	1.6656	0.985317	1.29216	1.5474	1.48235	1.46335	C00371	1637-39-4	ko00908,ko01100,ko01110,ko04075
IPA	3-Indolepropionic acid	Auxin	Positive	C11H11NO2	IPA	3-Indolepropionic acid	Auxin	190	130	189.079	Positive	[M+H]+	C11H11NO2		43.1743	17.0699	59.6527	71.1732	54.5955	214.522	145.87	105.811	55.1962	50.669	48.1632	-	830-96-6	-
GA6	Gibberellin A6	GA	Negative	C19H22O6	GA6	Gibberellin A6	GA	345.2	257.1	346.142	Negative	[M-H]-	C19H22O6	7.20864	5.50779	9.19057	8.71868	10.115	8.27884		8.81438	7.39198	8.79252	8.99174	8.96916	C11856	19147-78-5	-
tZR	trans-Zeatin riboside	CK	Positive	C15H21N5O5	tZR	trans-Zeatin riboside	CK	352.2	219.9	351.154	Positive	[M+H]+	C15H21N5O5		1.97574	0.790355	2.78717	4.93924	1.13816	2.59221		4.22601	2.16272	2.29542	2.06824	C16431	6025-53-2	ko00908,ko01110
OPDA	cis(+)-12-Oxophytodienoic acid	JA	Positive	C18H28O3	OPDA	cis(+)-12-Oxophytodienoic acid	JA	293.1	275.2	292.204	Positive	[M+H]+	C18H28O3	4.14225	7.45321	8.32727	13.1919	10.6193	11.9896			9.30907	8.15904	8.17526	7.67814	-	5074224-79-7	-
2MeSiPR	2-Methylthio-N6-isopentenyladenosine	CK	Positive	C16H23N5O4S	2MeSiPR	2-Methylthio-N6-isopentenyladenosine	CK	382.08	250.2	381.147	Positive	[M+H]+	C16H23N5O4S				2.00106	1.08639	1.74019	7.22082	6.3958	8.33529	3.8393	5.93044	4.2157	-	20859-00-1	-
H2JA	Dihydrojasmonic acid	JA	Negative	C12H20O3	H2JA	Dihydrojasmonic acid	JA	211.1	59	212.141	Negative	[M-H]-	C12H20O3	0.467656	0.483298	0.419156			0.247267	0.30986						-	3572-64-3	-
cZR	cis-Zeatin riboside	CK	Positive	C15H21N5O5	cZR	cis-Zeatin riboside	CK	352.135	220.1	351.154	Positive	[M+H]+	C15H21N5O5	0.230239	0.381621					1.06224	1.08496	2.55458	0.974316	0.990138	0.80458	C16449	15896-46-5	ko00908,ko01110
IAA-Glu	Indole-3-acetyl glutamic acid	Auxin	Negative	C15H16N2O5	IAA-Glu	Indole-3-acetyl glutamic acid	Auxin	302.97	145.9	304.106	Negative	[M-H]-	C15H16N2O5				2.10852		1.01163	1.51131		1.1975				-	57105-48-3	-
12-OH-JA	12-Hydroxyjasmonic acid	JA	Positive	C12H18O4	12-OH-JA	12-Hydroxyjasmonic acid	JA	209.2	191.2	226.121	Positive	[M-H2O+H]+	C12H18O4	36.2587			35.8165	37.7408	33.5758							-	140631-27-2	-
DHZR	Dihydrozeatin ribonucleoside	CK	Positive	C15H23N5O5	DHZR	Dihydrozeatin ribonucleoside	CK	353.993	222	353.17	Positive	[M+H]+	C15H23N5O5					0.978752		1.40369	0.818549	1.67051				C16447	22663-55-4	ko00908,ko01110
2-Coumarate	2-Coumarate	SA	Negative	C9H8O3	2-Coumarate	2-Coumarate	SA	162.8	119	164.047	Negative	[M-H]-	C9H8O3						11.0444		16.5436	12.2942				C01772	614-60-8	ko00360,ko00999,ko01100,ko01110
ST	（±）Strigol	SL	Positive	C19H22O6	ST	（±）Strigol	SL	347.4	96.9	346.142	Positive	[M+H]+	C19H22O6							64.8933	84.6613	103.596				C09190	51820-11-2	ko00906,ko01110
IAA-Phe-Me	Indole-3-acetyl-L-phenylalanne methyle ester	Auxin	Positive	C20H20N2O3	IAA-Phe-Me	Indole-3-acetyl-L-phenylalanne methyle ester	Auxin	337.01	130.2	336.147	Positive	[M+H]+	C20H20N2O3	2.51908	2.97342			1.49024								-	1060809-98-4	-
IAA-Val	N-(3-Indolylacetyl)-L-valine	Auxin	Positive	C15H18N2O3	IAA-Val	N-(3-Indolylacetyl)-L-valine	Auxin	275.134	130	274.132	Positive	[M+H]+	C15H18N2O3								1.34347	1.47137	0.89083	1.10139	0.709306	-	57105-42-7	-
OPC-6	3-oxo-2-(2-(Z)-Pentenyl)cyclopentane-1-hexanoic acid	JA	Positive	C16H26O3	OPC-6	3-oxo-2-(2-(Z)-Pentenyl)cyclopentane-1-hexanoic acid	JA	267.2	249.2	266.188	Positive	[M+H]+	C16H26O3								8.43522	10.5303				-	136768-22-4	-
OPC-4	3-oxo-2-(2-(Z)-Pentenyl) cyclopentane-1-butyric acid	JA	Positive	C14H22O3	OPC-4	3-oxo-2-(2-(Z)-Pentenyl) cyclopentane-1-butyric acid	JA	239.136	221.3	238.157	Positive	[M+H]+	C14H22O3							9.43757		12.0348	6.3387	5.98726	5.61886	-	136845-17-5	-
BAPR	6-Benzyladenosine	CK	Positive	C17H19N5O4	BAPR	6-Benzyladenosine	CK	358.079	226.1	357.144	Positive	[M+H]+	C17H19N5O4		0.321642							0.240699				-	4294-16-0	-
JA-Phe	N-[(-)-Jasmonoyl]-(l)-phenalanine	JA	Positive	C21H27NO4	JA-Phe	N-[(-)-Jasmonoyl]-(l)-phenalanine	JA	358.169	120.2	357.194	Positive	[M+H]+	C21H27NO4	0.13159		0.155936										-	120303-53-9	-
MEJA	Methyl jasmonate	JA	Positive	C13H20O3	MEJA	Methyl jasmonate	JA	225.2	151.2	224.141	Positive	[M+H]+	C13H20O3					37.6851	32.6644							C11512	39924-52-2	ko00592,ko01110
GA44	Gibberellin A44	GA	Negative	C20H26O5	GA44	Gibberellin A44	GA	345.1	301.2	346.178	Negative	[M-H]-	C20H26O5									3.04878				C12308	36434-15-8	-
2MeScZ	2-Methylthio-cis-zeatin	CK	Positive	C11H15N5OS	2MeScZ	2-Methylthio-cis-zeatin	CK	266.154	182.2	265.1	Positive	[M+H]+	C11H15N5OS									0.396062				-	52020-11-8	-
t-CA	trans-Cinnamic acid	SA	Negative	C9H8O2	t-CA	trans-Cinnamic acid	SA	146.8	77.1	148.052	Negative	[M-H]-	C9H8O2								85.4667					C00423	140-10-3	ko00130,ko00360,ko00940,ko00996,ko00999,ko01100,ko01110
IAA-Glc	1-O-indol-3-ylacetylglucose	Auxin	Positive	C16H19NO7	IAA-Glc	1-O-indol-3-ylacetylglucose	Auxin	360.1	198.2	337.116	Positive	[M+Na]+	C16H19NO7			304.608										-	19817-95-9	-
GA7	Gibberellin A7	GA	Negative	C19H22O5	GA7	Gibberellin A7	GA	329.2	223	330.147	Negative	[M-H]-	C19H22O5	0.0664126												C11867	510-75-8	ko00904,ko01110
K9G	Kinetin-9-glucoside	CK	Positive	C16H19N5O6	K9G	Kinetin-9-glucoside	CK	378.163	216.1	377.134	Positive	[M+H]+	C16H19N5O6					0.126217								-	98177-43-6	-
MeSAG	2-Methoxycarbonylphenyl beta-D-glucopyranoside	SA	Positive	C14H18O8	MeSAG	2-Methoxycarbonylphenyl beta-D-glucopyranoside	SA	337.1	337.1	314.1	Positive	[M+Na]+	C14H18O8			61.3346										-	10019-60-0	-
BAP	6-Benzyladenine	CK	Positive	C12H11N5	BAP	6-Benzyladenine	CK	226.051	91.1	225.101	Positive	[M+H]+	C12H11N5	0.403916												C11263	1214-39-7	-
GA3	Gibberellin A3	GA	Negative	C19H22O6	GA3	Gibberellin A3	GA	345	239	346.142	Negative	[M-H]-	C19H22O6	0.87418												C01699	1977-6-5	ko00904,ko01110
IAN	3-Indoleacetonitrile	Auxin	Positive	C10H8N2	IAN	3-Indoleacetonitrile	Auxin	157.037	130.1	156.069	Positive	[M+H]+	C10H8N2	0.35886												-	771-51-7	-
GA1	Gibberellin A1	GA	Negative	C19H24O6	GA1	Gibberellin A1	GA	347	259	348.157	Negative	[M-H]-	C19H24O6		14.2595											C00859	545-97-1	ko00904,ko01100,ko01110,ko04075
GA9	Gibberellin A9	GA	Negative	C19H24O4	GA9	Gibberellin A9	GA	315.1	270.9	316.167	Negative	[M-H]-	C19H24O4													C11863	427-77-0	ko00904,ko01100,ko01110
MLT	Melatonine	MLT	Positive	C13H16N2O2	MLT	Melatonine	MLT	233.1	174.1	232.121	Positive	[M+H]+	C13H16N2O2													C01598	73-31-4	ko00380,ko01100,ko01110
GA19	Gibberellin A19	GA	Negative	C20H26O6	GA19	Gibberellin A19	GA	361.2	273.2	362.173	Negative	[M-H]-	C20H26O6													C02034	6980-44-5	ko00904,ko01100,ko01110
GA34	Gibberellin A34	GA	Negative	C19H24O6	GA34	Gibberellin A34	GA	347.2	241.3	348.157	Negative	[M-H]-	C19H24O6													C11868	32630-92-5	ko00904
GA8	Gibberellin A8	GA	Negative	C19H24O7	GA8	Gibberellin A8	GA	363.1	275.2	364.152	Negative	[M-H]-	C19H24O7													C03579	7044-72-6	ko00904
GA53	Gibberellin A53	GA	Negative	C20H28O5	GA53	Gibberellin A53	GA	347.1	303.1	348.194	Negative	[M-H]-	C20H28O5													C06094	51576-08-0	ko00904,ko01100,ko01110
GA12-ald	Gibberellin A12 aldehyde	GA	Negative	C20H28O3	GA12-ald	Gibberellin A12 aldehyde	GA	315.1	271.1	316.204	Negative	[M-H]-	C20H28O3													C06093	19436-07-8	ko00904,ko01100,ko01110
GA24	Gibberellin A24	GA	Negative	C20H26O5	GA24	Gibberellin A24	GA	345.1	257.1	346.178	Negative	[M-H]-	C20H26O5													C11861	19427-32-8	ko00904,ko01100,ko01110
GA15	Gibberellin A15	GA	Negative	C20H26O4	GA15	Gibberellin A15	GA	329.1	131	330.183	Negative	[M-H]-	C20H26O4													C14162	13744-18-8	-
JA-ACC	Jasmonate-1-aminocyclopropane-1-carboxylic acid	JA	Positive	C16H22NO4-	JA-ACC	Jasmonate-1-aminocyclopropane-1-carboxylic acid	JA	294.1	151.1	292.155	Positive	[M+H]+	C16H22NO4-													-	-	-
GA51	Gibberellin A51	GA	Negative	C19H24O5	GA51	Gibberellin A51	GA	331.1	243.2	332.162	Negative	[M-H]-	C19H24O5													C11865	56978-14-4	ko00904,ko01110
ABA-GE	ABA-glucosyl ester	ABA	Positive	C21H30O9	ABA-GE	ABA-glucosyl ester	ABA	449.3	287.2	426.189	Positive	[M+Na]+	C21H30O9													-	79199-48-7	-
GA4	Gibberellin A4	GA	Negative	C19H24O5	GA4	Gibberellin A4	GA	331	212.8	332.162	Negative	[M-H]-	C19H24O5													C11864	468-44-0	ko00904,ko01100,ko01110,ko04075
ABA-ald	Abscisic aldehyde	ABA	Positive	C15H20O3	ABA-ald	Abscisic aldehyde	ABA	249.2	147	248.141	Positive	[M+H]+	C15H20O3													C13455	41944-86-9	ko00906,ko01100,ko01110
IAA-Leu	N-(3-Indolylacetyl)-L-leucine	Auxin	Positive	C16H20N2O3	IAA-Leu	N-(3-Indolylacetyl)-L-leucine	Auxin	289.195	130	288.147	Positive	[M+H]+	C16H20N2O3													-	36838-63-8	-
IAA-Glu-diMe	Indole-3-acetyl-L-glutamic acid dimethyl ester	Auxin	Negative	C17H20N2O5	IAA-Glu-diMe	Indole-3-acetyl-L-glutamic acid dimethyl ester	Auxin	330.958	115.8	332.137	Negative	[M-H]-	C17H20N2O5													-	-	-
IAA-Ala	N-(3-Indolylacetyl)-L-alanine	Auxin	Positive	C13H14N2O3	IAA-Ala	N-(3-Indolylacetyl)-L-alanine	Auxin	247.054	130.1	246.1	Positive	[M+H]+	C13H14N2O3													-	57105-39-2	-
IA	3-Indoleacrylic acid	Auxin	Positive	C11H9NO2	IA	3-Indoleacrylic acid	Auxin	188.061	170.1	187.063	Positive	[M+H]+	C11H9NO2													-	1204-06-4	-
IAA-Gly	Indole-3-acetyl glycine	Auxin	Positive	C12H12N2O3	IAA-Gly	Indole-3-acetyl glycine	Auxin	233.056	130.1	232.085	Positive	[M+H]+	C12H12N2O3													-	13113-08-1	-
ICA	Indole-3-carboxylic acid	Auxin	Negative	C9H7NO2	ICA	Indole-3-carboxylic acid	Auxin	160	116.1	161.048	Negative	[M-H]-	C9H7NO2													C19837	771-50-6	-
IAM	3-Indole acetamide	Auxin	Positive	C10H10N2O	IAM	3-Indole acetamide	Auxin	175.072	130.1	174.079	Positive	[M+H]+	C10H10N2O													C02693	879-37-8	ko00380,ko01100
IAA	Indole-3-acetic acid	Auxin	Positive	C10H9NO2	IAA	Indole-3-acetic acid	Auxin	176.1	130.1	175.063	Positive	[M+H]+	C10H9NO2													C00954	87-51-4	ko00380,ko01100,ko04075
IAA-Leu-Me	Indole-3-acetyl-L-leucine methyl ester	Auxin	Positive	C17H22N2O3	IAA-Leu-Me	Indole-3-acetyl-L-leucine methyl ester	Auxin	302.9	130.1	302.163	Positive	[M+H]+	C17H22N2O3													-	30372-97-3	-
IAA-Phe	N-(3-Indolylacetyl)-L-phenylalanine	Auxin	Negative	C19H18N2O3	IAA-Phe	N-(3-Indolylacetyl)-L-phenylalanine	Auxin	321.025	164.1	322.132	Negative	[M-H]-	C19H18N2O3													-	57105-50-7	-
IAA-Val-Me	Indole-3-acetyl-L-valine methyl ester	Auxin	Positive	C16H20N2O3	IAA-Val-Me	Indole-3-acetyl-L-valine methyl ester	Auxin	289.208	130.1	288.147	Positive	[M+H]+	C16H20N2O3													-	1308991-15-2	-
IBA	Indole-3-butyric acid	Auxin	Positive	C12H13NO2	IBA	Indole-3-butyric acid	Auxin	204.3	130.2	203.095	Positive	[M+H]+	C12H13NO2													C11284	133-32-4	-
ILA	Indole-3-lactic acid	Auxin	Negative	C11H11NO3	ILA	Indole-3-lactic acid	Auxin	203.95	158	205.074	Negative	[M-H]-	C11H11NO3													-	1821-52-9	-
Indole	Indole	Auxin	Positive	C8H7N	Indole	Indole	Auxin	118.1	91	117.058	Positive	[M+H]+	C8H7N													C00463	120-72-9	ko00380,ko00400,ko00402,ko00999,ko01100,ko01110
IAA-Trp	Indole-3-acetyl-L-tryptophan	Auxin	Negative	C21H19N3O3	IAA-Trp	Indole-3-acetyl-L-tryptophan	Auxin	360.007	203	361.143	Negative	[M-H]-	C21H19N3O3													-	57105-53-0	-
oT9G	ortho-Topolin-9-glucoside	CK	Positive	C18H21N5O6	oT9G	ortho-Topolin-9-glucoside	CK	404.011	136.2	403.149	Positive	[M+H]+	C18H21N5O6													-	160299-96-7	-
GA20	Gibberellin A20	GA	Negative	C19H24O5	GA20	Gibberellin A20	GA	331.3	287	332.162	Negative	[M-H]-	C19H24O5													C02035	19143-87-4	ko00904,ko01100,ko01110
pTR	para-Topolin riboside	CK	Positive	C17H19N5O5	pTR	para-Topolin riboside	CK	374.066	242.2	373.139	Positive	[M+H]+	C17H19N5O5													-	23666-24-2	-
mT9G	meta-Topolin-9-glucoside	CK	Positive	C18H21N5O6	mT9G	meta-Topolin-9-glucoside	CK	404.063	242.3	403.149	Positive	[M+H]+	C18H21N5O6													-	179528-30-4	-
BAP9G	N6-Benzyladenine-9-glucoside	CK	Positive	C18H21N5O5	BAP9G	N6-Benzyladenine-9-glucoside	CK	388.08	226.1	387.154	Positive	[M+H]+	C18H21N5O5													-	4294-17-1	-
K	Kinetin	CK	Positive	C10H9N5O	K	Kinetin	CK	216.042	81	215.081	Positive	[M+H]+	C10H9N5O													C08272	525-79-1	-
KR	Kinetin riboside	CK	Positive	C15H17N5O5	KR	Kinetin riboside	CK	348.067	216.2	347.123	Positive	[M+H]+	C15H17N5O5													-	4338-47-0	-
GA5	Gibberellin A5	GA	Negative	C19H22O5	GA5	Gibberellin A5	GA	329.1	145	330.147	Negative	[M-H]-	C19H22O5													C11871	561-56-8	ko00904,ko01110
2CltZ	2-Chloro-trans-zeatin	CK	Positive	C10H12ClN5O	2CltZ	2-Chloro-trans-zeatin	CK	254.3	170.2	253.073	Positive	[M+H]+	C10H12ClN5O													-	29736-30-9	-
mT	meta-Topolin	CK	Positive	C12H11N5O	mT	meta-Topolin	CK	242.07	107.1	241.096	Positive	[M+H]+	C12H11N5O													-	75737-38-1	-
iP7G	N6-Isopentenyl-adenine-7-glucoside	CK	Positive	C16H23N5O5	iP7G	N6-Isopentenyl-adenine-7-glucoside	CK	366.107	204.2	365.17	Positive	[M+H]+	C16H23N5O5													-	59384-58-6	-
2MeSiP	2-Methylthio-N6-isopentenyladenine	CK	Positive	C11H15N5S	2MeSiP	2-Methylthio-N6-isopentenyladenine	CK	250.074	182.1	249.105	Positive	[M+H]+	C11H15N5S													-	20758-33-2	-
oTR	ortho-Topolin riboside	CK	Positive	C17H19N5O5	oTR	ortho-Topolin riboside	CK	374.065	136	373.139	Positive	[M+H]+	C17H19N5O5													-	50868-58-1	-
mTR	meta-Topolin riboside	CK	Positive	C17H19N5O5	mTR	meta-Topolin riboside	CK	374.09	242.1	373.139	Positive	[M+H]+	C17H19N5O5													-	110505-76-5	-
oT	ortho-Topolin	CK	Positive	C12H11N5O	oT	ortho-Topolin	CK	242.067	136.1	241.096	Positive	[M+H]+	C12H11N5O													-	20366-83-0	-
pT	para-Topolin	CK	Positive	C12H11N5O	pT	para-Topolin	CK	242.104	136.2	241.096	Positive	[M+H]+	C12H11N5O													-	80054-30-4	-
5DS	5-Deoxystrigol	SL	Positive	C19H22O5	5DS	5-Deoxystrigol	SL	331.116	217.2	330.147	Positive	[M+H]+	C19H22O5													C18037	151716-18-6	ko00906,ko01110
