# Supplementary material for: Genome-wide identification and expression analysis of the LBD gene family in Jasminum sambac
Source: Research Square preprint supplement (doi:10.21203/rs.3.rs-7770306/v1), 2025-10-30
Supplement: Supplementary file 9 [file dc1406f69d06ad938c78c546.xlsx]

## Sheet: Sheet1
ID	DJ2-1 (48 h, FPKM)	DJ2-2 (48 h, FPKM)	DJ2-3 (48 h, FPKM)	DJ3-1 (96 h, FPKM)	DJ3-2 (96 h, FPKM)	DJ3-3 (96 h, FPKM)	DJ2-1 (48 h, COUNT)	DJ2-2 (48 h, COUNT)	DJ2-3 (48 h, COUNT)	DJ3-1 (96 h, COUNT)	DJ3-2 (96 h, COUNT)	DJ3-3 (96 h, COUNT)	log2FoldChange (96h / 48h)	pvalue	padj	regulated	chr	start	end	strand	gene_name	gene_description	KEGG	KEGG pathway	NR	Swissprot	Tremble	KOG	GO	Pfam	TF-Family	TF-Category	TF-Classification
DJ03884	132.875	135.679	148.273	36.9421	32.6648	40.9322	1271	1772	1340	376	341	383	-1.86061	1.22041e-49	2.36149e-45	down	GWHBFHJ00000006	11574269	11574855	-	DJ03884	--	K13993 HSP20 family protein | (RefSeq) 17.3 kDa class I heat shock protein-like (A)	ko04141: Protein processing in endoplasmic reticulum	kDa class I heat shock -like [Olea europaea subsp. europaea]	HSP16_SOYBN RecName: Full=18.5 kDa class I heat shock protein; AltName: Full=HSP 18.5;	E1UIZ9_OLEEU SubName: Full=Putative small heat shock protein {ECO:0000313|EMBL:CBG37777.1};	Molecular chaperone (small heat-shock protein Hsp26/Hsp42)	GO:0005737,cytoplasm; GO:0043621,protein self-association; GO:0051082,unfolded protein binding; GO:0051259,protein complex oligomerization; GO:0006457,protein folding; GO:0009408,response to heat; GO:0042542,response to hydrogen peroxide; GO:0009651,response to salt stress; GO:0003674,molecular_function; GO:0005488,binding; GO:0005515,protein binding; GO:0008150,biological_process; GO:0009987,cel…	PF00011.24:Hsp20/alpha crystallin family	--	--	--
DJ28568	137.665	141.879	153.475	46.8518	40.462	44.7547	1088	1531	1146	394	349	346	-1.6577	2.84668e-47	2.75416e-43	down	GWHBFHJ00000004	7911608	7912428	+	DJ28568	--	--	--	protein EARLY FLOWERING 4-like [Olea europaea var. sylvestris]	EF4L1_ARATH RecName: Full=Protein ELF4-LIKE 1;	A0A8M8V0W2_SESIN SubName: Full=protein EARLY FLOWERING 4-like {ECO:0000313|RefSeq:XP_020549990.1};	--	GO:0005634,nucleus; GO:0042803,protein homodimerization activity; GO:0009649,entrainment of circadian clock; GO:0042753,positive regulation of circadian rhythm; GO:0048511,rhythmic process; GO:0003674,molecular_function; GO:0005488,binding; GO:0005515,protein binding; GO:0042802,identical protein binding; GO:0046983,protein dimerization activity; GO:0007623,circadian rhythm; GO:0008150,biological…	PF07011.14:Early Flowering 4 domain	--	--	--
novel.2970	50.3941	55.1648	53.912	223.435	161.241	224.417	744	1112	752	3510	2598	3241	1.9802	1.88998e-38	1.21904e-34	up	GWHBFHJ00000010	23801940	23802953	-	--	--	K00384 thioredoxin reductase (NADPH) [EC:1.8.1.9] | (RefSeq) thioredoxin reductase 1-like (A)	ko00450: Selenocompound metabolism	germin-like protein subfamily 1 member 13, partial [Olea europaea var. sylvestris]	GL116_ARATH RecName: Full=Germin-like protein subfamily 1 member 16; Flags: Precursor;	A0A2G9FZS4_9LAMI RecName: Full=Germin-like protein {ECO:0000256|RuleBase:RU366015};	--	GO:0048046,apoplast; GO:0030145,manganese ion binding; GO:0003674,molecular_function; GO:0005488,binding; GO:0043167,ion binding; GO:0043169,cation binding; GO:0046872,metal ion binding; GO:0046914,transition metal ion binding; GO:0005575,cellular_component; GO:0005576,extracellular region; GO:0110165,cellular anatomical entity	PF00190.25:Cupin	--	--	--
DJ06729	163.645	193.931	139.795	788.197	945.487	956.373	1296	2097	1046	6642	8172	7409	2.49016	9.55089e-33	4.62024e-29	up	GWHBFHJ00000007	5795687	5796459	+	DJ06729	--	K05387 glutamate receptor, ionotropic, plant | (RefSeq) LOW QUALITY PROTEIN: glutamate receptor 2.3-like (A)	--	major allergen Pru ar 1-like [Olea europaea var. sylvestris]	PRU1_PRUAR RecName: Full=Major allergen Pru ar 1; AltName: Allergen=Pru ar 1;	A0A5J5AAS6_9ASTE RecName: Full=Bet_v_1 domain-containing protein {ECO:0000259|SMART:SM01037};	--	GO:0010427,abscisic acid binding; GO:0004864,protein phosphatase inhibitor activity; GO:0038023,signaling receptor activity; GO:0009738,abscisic acid-activated signaling pathway; GO:0006952,defense response; GO:0009607,response to biotic stimulus; GO:0003674,molecular_function; GO:0005488,binding; GO:0008289,lipid binding; GO:0019840,isoprenoid binding; GO:0031406,carboxylic acid binding; GO:0033…	PF00407.22:Pathogenesis-related protein Bet v 1 family	--	--	--
DJ28026	341.114	308.997	328.764	674.899	624.435	655.905	12001	14843	10928	25265	23976	22573	1.05526	2.24067e-31	8.6714e-28	up	GWHBFHJ00000004	1667671	1670818	-	DJ28026	--	K03283 heat shock 70kDa protein 1/6/8 | (RefSeq) heat shock cognate 70 kDa protein 2-like (A)	ko03040: Spliceosome; ko04141: Protein processing in endoplasmic reticulum; ko04144: Endocytosis	heat shock cognate 70 kDa protein 2-like [Olea europaea var. sylvestris]	HS704_ARATH RecName: Full=Heat shock 70 kDa protein 4 {ECO:0000303|PubMed:11599561}; AltName: Full=Heat shock cognate 70 kDa protein 4 {ECO:0000303|PubMed:11402207}; AltName: Full=Heat shock cognate protein 70-4 {ECO:0000303|PubMed:11402207}; Short=AtHsc70-4 {ECO:0000303|PubMed:11402207}; AltName: Full=Heat shock protein 70-4 {ECO:0000303|PubMed:11599561}; Short=AtHsp70-4 {ECO:0000303|PubMed:1159…	A0A6N2B438_SOLCI SubName: Full=Uncharacterized protein {ECO:0000313|EMBL:TMW88369.1};	Molecular chaperones HSP70/HSC70, HSP70 superfamily	GO:0005737,cytoplasm; GO:0005829,cytosol; GO:0005794,Golgi apparatus; GO:0005739,mitochondrion; GO:0005634,nucleus; GO:0009505,plant-type cell wall; GO:0000325,plant-type vacuole; GO:0005886,plasma membrane; GO:0005524,ATP binding; GO:0016887,ATP hydrolysis activity; GO:0140662,ATP-dependent protein folding chaperone; GO:0031072,heat shock protein binding; GO:0051787,misfolded protein binding; GO…	PF00012.23:Hsp70 protein	--	--	--
DJ26489	26.4315	32.9656	27.0027	113.078	86.0991	116.305	690	1175	666	3141	2453	2970	1.91246	2.42931e-27	7.83453e-24	up	GWHBFHJ00000003	15826946	15828547	+	DJ26489	--	K22395 cinnamyl-alcohol dehydrogenase [EC:1.1.1.195] | (RefSeq) hypothetical protein (A)	ko00940: Phenylpropanoid biosynthesis; ko01100: Metabolic pathways; ko01110: Biosynthesis of secondary metabolites	berberine bridge enzyme-like 18 [Olea europaea var. sylvestris]	BBE18_ARATH RecName: Full=Berberine bridge enzyme-like 18 {ECO:0000303|PubMed:26037923}; Short=AtBBE-like 18 {ECO:0000303|PubMed:26037923}; EC=1.1.1.- {ECO:0000250|UniProtKB:O64743}; Flags: Precursor;	A0A022PXZ9_ERYGU RecName: Full=FAD-binding PCMH-type domain-containing protein {ECO:0000259|PROSITE:PS51387}; Flags: Fragment;	--	GO:0005576,extracellular region; GO:0009505,plant-type cell wall; GO:0071949,FAD binding; GO:0016491,oxidoreductase activity; GO:0000166,nucleotide binding; GO:0003674,molecular_function; GO:0005488,binding; GO:0036094,small molecule binding; GO:0043167,ion binding; GO:0043168,anion binding; GO:0050660,flavin adenine dinucleotide binding; GO:0097159,organic cyclic compound binding; GO:1901265,nuc…	PF01565.26:FAD binding domain	--	--	--
DJ13052	0.6331	1.5359	0.6282	18.555	27.1177	15.8554	16	53	15	499	748	392	4.49045	2.22984e-26	6.1639e-23	up	GWHBFHJ00000009	24545732	24548155	-	DJ13052	--	K01051 pectinesterase [EC:3.1.1.11] | (RefSeq) pectinesterase 2 (A)	ko00040: Pentose and glucuronate interconversions; ko01100: Metabolic pathways	pectinesterase 2 [Olea europaea subsp. europaea]	PME2_CITSI RecName: Full=Pectinesterase 2; Short=PE 2; EC=3.1.1.11; AltName: Full=Pectin methylesterase; Flags: Precursor;	A0A2G9GDA1_9LAMI RecName: Full=Pectinesterase {ECO:0000256|ARBA:ARBA00013229, ECO:0000256|RuleBase:RU000589}; EC=3.1.1.11 {ECO:0000256|ARBA:ARBA00013229, ECO:0000256|RuleBase:RU000589};	--	GO:0005576,extracellular region; GO:0045330,aspartyl esterase activity; GO:0004857,enzyme inhibitor activity; GO:0030599,pectinesterase activity; GO:0042545,cell wall modification; GO:0045490,pectin catabolic process; GO:0003674,molecular_function; GO:0003824,catalytic activity; GO:0016787,hydrolase activity; GO:0016788,hydrolase activity, acting on ester bonds; GO:0030234,enzyme regulator activi…	PF01095.22:Pectinesterase	--	--	--
DJ09853	1356.7	1512.2	1156.15	8599.96	5797.85	5464.73	16581	25234	13350	111837	77333	65332	2.34689	4.31761e-26	1.04432e-22	up	GWHBFHJ00000008	10286263	10288313	-	DJ09853	--	K20628 expansin | (RefSeq) expansin-B3 (A)	--	expansin-like B1 [Olea europaea var. sylvestris]	EXLB1_ARATH RecName: Full=Expansin-like B1; Short=At-EXPR1; Short=AtEXLB1; Short=AtEXPR1; AltName: Full=Ath-ExpBeta-3.1; Flags: Precursor;	A0A6I9SK31_SESIN SubName: Full=expansin-like B1 {ECO:0000313|RefSeq:XP_011070248.1};	--	GO:0005576,extracellular region; GO:0009653,anatomical structure morphogenesis; GO:0019953,sexual reproduction; GO:0008150,biological_process; GO:0032502,developmental process; GO:0048856,anatomical structure development; GO:0000003,reproduction; GO:0005575,cellular_component; GO:0110165,cellular anatomical entity	PF01357.24:Expansin C-terminal domain	--	--	--
DJ12469	3.8225	2.497	2.4056	18.8359	23.8549	23.7629	37	33	22	194	252	225	2.99628	3.51103e-25	7.54872e-22	up	GWHBFHJ00000009	8629770	8630363	+	DJ12469	--	K25075 pterocarpan synthase [EC:4.2.1.139] | (RefSeq) dirigent protein 2-like (A)	ko00943: Isoflavonoid biosynthesis; ko01100: Metabolic pathways; ko01110: Biosynthesis of secondary metabolites	Hypothetical predicted protein [Olea europaea subsp. europaea]	DIR11_ARATH RecName: Full=Dirigent protein 11; Short=AtDIR11; Flags: Precursor;	A0A022QYE6_ERYGU RecName: Full=Dirigent protein {ECO:0000256|RuleBase:RU363099};	--	GO:0048046,apoplast; GO:0009699,phenylpropanoid biosynthetic process; GO:0006725,cellular aromatic compound metabolic process; GO:0008150,biological_process; GO:0008152,metabolic process; GO:0009058,biosynthetic process; GO:0009698,phenylpropanoid metabolic process; GO:0009987,cellular process; GO:0019438,aromatic compound biosynthetic process; GO:0019748,secondary metabolic process; GO:0044237,c…	PF03018.17:Dirigent-like protein	--	--	--
DJ14781	17.1293	19.0916	19.2818	4.8645	5.7397	4.6876	1102	1677	1172	333	403	295	-1.79598	6.1478e-25	1.1896e-21	down	GWHBFHJ00000010	2699976	2707129	-	DJ14781	--	K05658 ATP-binding cassette, subfamily B (MDR/TAP), member 1 [EC:7.6.2.2] | (RefSeq) ABC transporter B family member 15-like (A)	ko02010: ABC transporters	ABC transporter B family member 15-like [Olea europaea var. sylvestris]	AB15B_ARATH RecName: Full=ABC transporter B family member 15; Short=ABC transporter ABCB.15; Short=AtABCB15; AltName: Full=Multidrug resistance protein 13; AltName: Full=P-glycoprotein 15;	A0A6I9UC25_SESIN SubName: Full=ABC transporter B family member 15-like {ECO:0000313|RefSeq:XP_011098546.1};	Multidrug/pheromone exporter, ABC superfamily	GO:0016021,integral component of membrane; GO:0140359,ABC-type transporter activity; GO:0005524,ATP binding; GO:0042626,ATPase-coupled transmembrane transporter activity; GO:0055085,transmembrane transport; GO:0003674,molecular_function; GO:0005215,transporter activity; GO:0015399,primary active transmembrane transporter activity; GO:0022804,active transmembrane transporter activity; GO:0022857,t…	PF00664.26:ABC transporter transmembrane region	--	--	--
DJ13429	2.0297	2.8814	2.5461	15.9902	10.2861	11.8347	81	157	96	679	448	462	2.39265	1.03142e-24	1.81436e-21	up	GWHBFHJ00000009	29949357	29959383	+	DJ13429	--	K12133 MYB-related transcription factor LHY | (RefSeq) protein LHY-like (A)	ko04712: Circadian rhythm - plant	LHY-like isoform X1 [Olea europaea subsp. europaea]	LHY_PETHY RecName: Full=Protein LATE ELONGATED HYPOCOTYL {ECO:0000303|PubMed:26124104}; Short=PhLHY {ECO:0000303|PubMed:26124104};	A0A8M8V2Y3_SESIN SubName: Full=protein LHY-like {ECO:0000313|RefSeq:XP_020553443.1};	Zuotin and related molecular chaperones (DnaJ superfamily), contains DNA-binding domains	GO:0005634,nucleus; GO:0000976,transcription cis-regulatory region binding; GO:0007623,circadian rhythm; GO:0010597,green leaf volatile biosynthetic process; GO:0045892,negative regulation of DNA-templated transcription; GO:0042752,regulation of circadian rhythm; GO:0001067,transcription regulatory region nucleic acid binding; GO:0003674,molecular_function; GO:0003676,nucleic acid binding; GO:000…	PF00249.34:Myb-like DNA-binding domain	MYB-related	TF	MYB->MYB-related
DJ07921	11.8173	9.5661	11.1034	28.2519	28.5326	34.6733	285	315	253	725	751	818	1.55352	1.46752e-21	2.36638e-18	up	GWHBFHJ00000007	30981708	30984449	-	DJ07921	--	K14498 serine/threonine-protein kinase SRK2 [EC:2.7.11.1] | (RefSeq) serine/threonine-protein kinase SAPK2-like (A)	ko04016: MAPK signaling pathway - plant; ko04075: Plant hormone signal transduction	serine threonine- kinase SAPK2 [Olea europaea subsp. europaea]	SAPK2_ORYSI RecName: Full=Serine/threonine-protein kinase SAPK2; EC=2.7.11.1; AltName: Full=Osmotic stress/abscisic acid-activated protein kinase 2;	A0A6I9UIA8_SESIN SubName: Full=serine/threonine-protein kinase SAPK2 {ECO:0000313|RefSeq:XP_011100039.1};	Serine/threonine protein kinase	GO:0005737,cytoplasm; GO:0005634,nucleus; GO:0005524,ATP binding; GO:0106310,protein serine kinase activity; GO:0004674,protein serine/threonine kinase activity; GO:0009738,abscisic acid-activated signaling pathway; GO:0006468,protein phosphorylation; GO:0009845,seed germination; GO:0000166,nucleotide binding; GO:0003674,molecular_function; GO:0005488,binding; GO:0017076,purine nucleotide binding…	PF00069.28:Protein kinase domain	--	--	--
novel.1351	35.3699	40.8729	35.9196	114.915	85.8542	96.167	1234	1947	1184	4266	3269	3282	1.45181	1.71373e-21	2.55082e-18	up	GWHBFHJ00000005	29103787	29116120	+	--	--	K22425 oleuropein beta-glucosidase [EC:3.2.1.206] | (RefSeq) beta-glucosidase (A)	--	beta-glucosidase-like [Olea europaea subsp. europaea]	BGLC_OLEEU RecName: Full=Oleuropein beta-glucosidase {ECO:0000305}; EC=3.2.1.206 {ECO:0000269|PubMed:25697790}; AltName: Full=Beta-glucosidase {ECO:0000303|PubMed:25697790}; Short=OeGLU {ECO:0000303|PubMed:25697790};	A0A2H4ER88_OLEEU SubName: Full=Beta-glucosidase {ECO:0000313|EMBL:ANW07465.1};	Beta-glucosidase, lactase phlorizinhydrolase, and related proteins	GO:0005634,nucleus; GO:0008422,beta-glucosidase activity; GO:0043621,protein self-association; GO:0005975,carbohydrate metabolic process; GO:0006952,defense response; GO:0051259,protein complex oligomerization; GO:0003674,molecular_function; GO:0003824,catalytic activity; GO:0004553,hydrolase activity, hydrolyzing O-glycosyl compounds; GO:0015926,glucosidase activity; GO:0016787,hydrolase activit…	PF00232.21:Glycosyl hydrolase family 1	--	--	--
DJ04636	1.2663	0.7848	0.8248	17.6681	17.3151	8.962	13	11	8	193	194	90	4.00811	6.27596e-20	8.67427e-17	up	GWHBFHJ00000006	29773201	29773830	-	DJ04636	--	--	--	uncharacterized protein LOC111406845 [Olea europaea var. sylvestris]	--	A0A6P6TLY3_COFAR SubName: Full=uncharacterized protein LOC113702182 {ECO:0000313|RefSeq:XP_027079047.1};	--	--	PF14009.9:PADRE domain	--	--	--
novel.2786	36.4732	37.6318	39.3913	74.845	80.5965	85.54	1030	1451	1051	2249	2484	2363	1.14588	1.10202e-18	1.42161e-15	up	GWHBFHJ00000009	38426530	38429035	+	--	--	K20772 1-aminocyclopropane-1-carboxylate synthase 1/2/6 [EC:4.4.1.14] | (RefSeq) 1-aminocyclopropane-1-carboxylate synthase-like (A)	ko00270: Cysteine and methionine metabolism; ko01100: Metabolic pathways; ko01110: Biosynthesis of secondary metabolites; ko04016: MAPK signaling pathway - plant	1-aminocyclopropane-1-carboxylate synthase-like [Olea europaea var. sylvestris]	1A1C_TOBAC RecName: Full=1-aminocyclopropane-1-carboxylate synthase; Short=ACC synthase; EC=4.4.1.14; AltName: Full=S-adenosyl-L-methionine methylthioadenosine-lyase;	A0A5J4ZP62_9ASTE RecName: Full=Aminotran_1_2 domain-containing protein {ECO:0000259|Pfam:PF00155};	1-aminocyclopropane-1-carboxylate synthase, and related proteins	GO:0016847,1-aminocyclopropane-1-carboxylate synthase activity; GO:0030170,pyridoxal phosphate binding; GO:0008483,transaminase activity; GO:0006520,cellular amino acid metabolic process; GO:0009693,ethylene biosynthetic process; GO:0009835,fruit ripening; GO:0003674,molecular_function; GO:0003824,catalytic activity; GO:0016829,lyase activity; GO:0016846,carbon-sulfur lyase activity; GO:0005488,b…	PF00155.24:Aminotransferase class I and II	--	--	--
DJ12123	6.8407	8.5056	7.6192	1.8689	1.8221	1.9515	172	292	181	50	50	48	-1.97461	4.56093e-18	5.51587e-15	down	GWHBFHJ00000009	3758615	3761329	-	DJ12123	--	K07374 tubulin alpha | (RefSeq) tubulin alpha chain (A)	ko04145: Phagosome; ko04814: Motor proteins	Alpha tubulin [Artemisia annua]	TBA_PRUDU RecName: Full=Tubulin alpha chain;	A0A2U1Q854_ARTAN RecName: Full=Tubulin alpha chain {ECO:0000256|RuleBase:RU000352};	Alpha tubulin	GO:0005737,cytoplasm; GO:0005874,microtubule; GO:0005525,GTP binding; GO:0005200,structural constituent of cytoskeleton; GO:0007017,microtubule-based process; GO:0000166,nucleotide binding; GO:0003674,molecular_function; GO:0005488,binding; GO:0017076,purine nucleotide binding; GO:0019001,guanyl nucleotide binding; GO:0032553,ribonucleotide binding; GO:0032555,purine ribonucleotide binding; GO:00…	PF00091.28:Tubulin/FtsZ family, GTPase domain	--	--	--
DJ02554	3.6649	4.1754	3.4049	0.3827	0.4851	0.4579	90	140	79	10	13	11	-3.03343	4.26708e-17	4.85694e-14	down	GWHBFHJ00000001	41341353	41343929	+	DJ02554	--	K04125 gibberellin 2beta-dioxygenase [EC:1.14.11.13] | (RefSeq) gibberellin 2-beta-dioxygenase 8-like isoform X1 (A)	ko00904: Diterpenoid biosynthesis; ko01110: Biosynthesis of secondary metabolites	2-oxoglutarate-dependent dioxygenase GA 2-oxidase [Jasminum sambac]	G2OX8_ARATH RecName: Full=Gibberellin 2-beta-dioxygenase 8; EC=1.14.11.13; AltName: Full=GA 2-oxidase 8; AltName: Full=Gibberellin 2-beta-hydroxylase 8; AltName: Full=Gibberellin 2-oxidase 8;	A0A5B7A7G2_DAVIN SubName: Full=Putative gibberellin 2-beta-dioxygenase 8-like {ECO:0000313|EMBL:MPA52699.1}; EC=1.14.11.13 {ECO:0000313|EMBL:MPA52699.1};	Iron/ascorbate family oxidoreductases	GO:0005737,cytoplasm; GO:0005634,nucleus; GO:0052635,C-20 gibberellin 2-beta-dioxygenase activity; GO:0051213,dioxygenase activity; GO:0046872,metal ion binding; GO:0010336,gibberellic acid homeostasis; GO:0009686,gibberellin biosynthetic process; GO:0045487,gibberellin catabolic process; GO:0009685,gibberellin metabolic process; GO:0003674,molecular_function; GO:0003824,catalytic activity; GO:00…	PF03171.23:2OG-Fe(II) oxygenase superfamily	--	--	--
novel.2005	6.8427	6.0458	5.6331	22.0995	36.4745	26.9257	126	152	98	433	733	485	2.27757	1.2884e-16	1.31214e-13	up	GWHBFHJ00000007	33977779	33978908	+	--	--	K17592 sacsin | (RefSeq) sacsin-like (A)	--	uncharacterized protein LOC111396436 [Olea europaea var. sylvestris]	--	A0A5B7C5H0_DAVIN SubName: Full=Uncharacterized protein {ECO:0000313|EMBL:MPA75476.1}; Flags: Fragment;	--	--	PF12609.11:Wound-induced protein	--	--	--
novel.1585	136.718	114.223	333.813	25.6975	14.0369	14.4771	1535	1751	3541	307	172	159	-3.36419	2.10157e-16	2.03327e-13	down	GWHBFHJ00000006	28107946	28108864	+	--	--	--	--	jasmintide 4 precursor [Jasminum sambac]	--	A0A2K9QL61_9LAMI SubName: Full=Jasmintide 4 {ECO:0000313|EMBL:AUR26543.1};	--	--	--	--	--	--
novel.556	15.0036	24.3192	57.3378	2.3115	0.6198	1.4458	244	540	881	40	11	23	-4.4139	3.47534e-16	3.20228e-13	down	GWHBFHJ00000002	25634943	25635940	+	--	--	--	--	--	--	--	--	--	--	--	--	--
DJ30009	353.207	266.091	319.846	885.697	639.731	712.32	4334	4458	3708	11564	8567	8550	1.30585	6.68831e-16	5.88267e-13	up	GWHBFHJ00000005	2568482	2569798	+	DJ30009	--	K00430 peroxidase [EC:1.11.1.7] | (RefSeq) cationic peroxidase 1-like (A)	ko00940: Phenylpropanoid biosynthesis; ko01100: Metabolic pathways; ko01110: Biosynthesis of secondary metabolites	cationic peroxidase 1-like [Olea europaea subsp. europaea]	PER1_ARAHY RecName: Full=Cationic peroxidase 1; EC=1.11.1.7; AltName: Full=PNPC1; Flags: Precursor;	A0A5J4ZKC4_9ASTE RecName: Full=Peroxidase {ECO:0000256|ARBA:ARBA00012313, ECO:0000256|RuleBase:RU362060}; EC=1.11.1.7 {ECO:0000256|ARBA:ARBA00012313, ECO:0000256|RuleBase:RU362060};	--	GO:0005576,extracellular region; GO:0020037,heme binding; GO:0046872,metal ion binding; GO:0004601,peroxidase activity; GO:0042744,hydrogen peroxide catabolic process; GO:0006979,response to oxidative stress; GO:0003674,molecular_function; GO:0005488,binding; GO:0046906,tetrapyrrole binding; GO:0097159,organic cyclic compound binding; GO:1901363,heterocyclic compound binding; GO:0043167,ion bindi…	PF00141.26:Peroxidase	--	--	--
DJ06588	7.1079	3.6958	6.6044	22.5898	23.5159	23.1856	131	93	115	443	473	418	2.06918	7.3142e-16	6.15347e-13	up	GWHBFHJ00000007	4228550	4230674	+	DJ06588	--	K17500 integrin-linked kinase-associated serine/threonine phosphatase 2C [EC:3.1.3.16] | (RefSeq) WAT1-related protein At3g18200-like (A)	--	WAT1-related At4g30420 [Olea europaea subsp. europaea]	WTR37_ARATH RecName: Full=WAT1-related protein At4g30420;	A0A2G9GC89_9LAMI RecName: Full=WAT1-related protein {ECO:0000256|RuleBase:RU363077};	--	GO:0016021,integral component of membrane; GO:0005886,plasma membrane; GO:0022857,transmembrane transporter activity; GO:0003674,molecular_function; GO:0005215,transporter activity; GO:0005575,cellular_component; GO:0016020,membrane; GO:0031224,intrinsic component of membrane; GO:0110165,cellular anatomical entity; GO:0071944,cell periphery	PF00892.23:EamA-like transporter family	--	--	--
DJ23283	9.0746	7.8925	14.2872	0.9594	1.1433	1.9133	160	190	238	18	22	33	-2.89731	8.31932e-16	6.70745e-13	down	GWHBFHJ00000013	29834036	29835210	-	DJ23283	--	K17808 mitochondrial protein import protein ZIM17 | (RefSeq) DNL-type zinc finger protein (A)	--	DNL-type zinc finger protein [Olea europaea var. sylvestris]	--	A0A2Z7D7B6_9LAMI RecName: Full=DNL-type domain-containing protein {ECO:0000259|PROSITE:PS51501};	--	GO:0008270,zinc ion binding; GO:0003674,molecular_function; GO:0005488,binding; GO:0043167,ion binding; GO:0043169,cation binding; GO:0046872,metal ion binding; GO:0046914,transition metal ion binding	--	--	--	--
DJ30020	11.3835	7.4063	8.6848	28.3477	33.4094	43.1224	197	175	142	522	631	730	1.99552	1.36289e-15	1.05488e-12	up	GWHBFHJ00000005	2859593	2864407	+	DJ30020	--	K05658 ATP-binding cassette, subfamily B (MDR/TAP), member 1 [EC:7.6.2.2] | (RefSeq) uncharacterized protein LOC111781709 (A)	ko02010: ABC transporters	protein SRG1-like [Olea europaea var. sylvestris]	SRG1_ARATH RecName: Full=Protein SRG1; Short=AtSRG1; AltName: Full=Protein SENESCENCE-RELATED GENE 1;	A0A2G9HXH5_9LAMI SubName: Full=Iron/ascorbate family oxidoreductase {ECO:0000313|EMBL:PIN22217.1}; EC=1.14.11.31 {ECO:0000313|EMBL:PIN22217.1};	Iron/ascorbate family oxidoreductases	GO:0046872,metal ion binding; GO:0016682,oxidoreductase activity, acting on diphenols and related substances as donors, oxygen as acceptor; GO:0010150,leaf senescence; GO:0003674,molecular_function; GO:0005488,binding; GO:0043167,ion binding; GO:0043169,cation binding; GO:0003824,catalytic activity; GO:0016491,oxidoreductase activity; GO:0016679,oxidoreductase activity, acting on diphenols and re…	PF03171.23:2OG-Fe(II) oxygenase superfamily	--	--	--
DJ17661	38.9074	39.3792	37.8189	84.2174	87.2543	76.5913	686	948	630	1580	1679	1321	1.15419	1.61135e-15	1.19922e-12	up	GWHBFHJ00000011	8911807	8913594	-	DJ17661	--	--	--	ninja-family protein AFP3-like [Olea europaea var. sylvestris]	AFP3_ARATH RecName: Full=Ninja-family protein AFP3; AltName: Full=ABI five-binding protein 3; Short=ABI5-binding protein 3;	A0A6I9UCI5_SESIN RecName: Full=Ninja-family protein {ECO:0000256|RuleBase:RU369029}; AltName: Full=ABI-binding protein {ECO:0000256|RuleBase:RU369029};	--	GO:0005634,nucleus; GO:0045892,negative regulation of DNA-templated transcription; GO:0009737,response to abscisic acid; GO:0007165,signal transduction; GO:0006139,nucleobase-containing compound metabolic process; GO:0006351,DNA-templated transcription; GO:0006355,regulation of DNA-templated transcription; GO:0006725,cellular aromatic compound metabolic process; GO:0006807,nitrogen compound metab…	PF16136.8:Putative nuclear localisation signal	--	--	--
DJ14275	3.1476	3.4972	3.2295	1.308	1.2066	1.1711	294	446	285	130	123	107	-1.36834	3.07184e-15	2.12286e-12	down	GWHBFHJ00000009	37318277	37327016	-	DJ14275	--	K22736 vacuolar iron transporter family protein | (RefSeq) vacuolar iron transporter homolog 1-like (A)	--	Hypothetical predicted protein [Olea europaea subsp. europaea]	VITH4_ARATH RecName: Full=Vacuolar iron transporter homolog 4 {ECO:0000305}; AltName: Full=Protein NODULIN-LIKE 4 {ECO:0000303|PubMed:21411332};	A0A2G9GJ46_9LAMI SubName: Full=Putative membrane protein {ECO:0000313|EMBL:PIN05278.1};	Uncharacterized membrane protein	GO:0016021,integral component of membrane; GO:0016020,membrane; GO:0005774,vacuolar membrane; GO:0005381,iron ion transmembrane transporter activity; GO:0005384,manganese ion transmembrane transporter activity; GO:0030026,cellular manganese ion homeostasis; GO:0006880,intracellular sequestering of iron ion; GO:0003674,molecular_function; GO:0005215,transporter activity; GO:0008324,cation transmem…	PF01988.22:VIT family	--	--	--
DJ17877	21.8463	25.0354	25.3068	10.5396	10.2347	10.6391	487	762	533	250	249	232	-1.14458	8.39877e-15	5.44239e-12	down	GWHBFHJ00000011	11934220	11936145	+	DJ17877	--	--	--	probable esterase D14L [Olea europaea var. sylvestris]	KAI2_ARATH RecName: Full=Probable esterase KAI2; AltName: Full=Protein DWARF-14-like; Short=Protein D14-like; AltName: Full=Protein HYPOSENSITIVE TO LIGHT; AltName: Full=Protein KARRIKIN INSENSITIVE 2;	A0A2Z7DFN4_9LAMI RecName: Full=AB hydrolase-1 domain-containing protein {ECO:0000259|Pfam:PF12697};	--	GO:0005829,cytosol; GO:0005634,nucleus; GO:0016787,hydrolase activity; GO:0009704,de-etiolation; GO:0009640,photomorphogenesis; GO:0080167,response to karrikin; GO:0003674,molecular_function; GO:0003824,catalytic activity; GO:0007275,multicellular organism development; GO:0008150,biological_process; GO:0009314,response to radiation; GO:0009416,response to light stimulus; GO:0009628,response to ab…	PF00561.23:alpha/beta hydrolase fold	--	--	--
DJ13246	59.5843	53.3319	80.4105	4.1241	4.5235	12.3366	869	1062	1108	64	72	176	-3.14968	8.43781e-15	5.44239e-12	down	GWHBFHJ00000009	27626695	27627964	-	DJ13246	--	K00384 thioredoxin reductase (NADPH) [EC:1.8.1.9] | (RefSeq) thioredoxin reductase 1-like (A)	ko00450: Selenocompound metabolism	germin-like protein 5-1 [Olea europaea var. sylvestris]	GL24_ARATH RecName: Full=Germin-like protein subfamily 2 member 4; Flags: Precursor;	A0A5B7ASL0_DAVIN RecName: Full=Germin-like protein {ECO:0000256|RuleBase:RU366015}; Flags: Fragment;	--	GO:0048046,apoplast; GO:0009505,plant-type cell wall; GO:0009506,plasmodesma; GO:0030145,manganese ion binding; GO:0010497,plasmodesmata-mediated intercellular transport; GO:2000280,regulation of root development; GO:0003674,molecular_function; GO:0005488,binding; GO:0043167,ion binding; GO:0043169,cation binding; GO:0046872,metal ion binding; GO:0046914,transition metal ion binding; GO:0006810,t…	PF00190.25:Cupin	--	--	--
DJ26492	1.1088	2.0162	0.5666	9.9535	12.6122	17.7845	29	72	14	277	360	455	3.46959	1.02123e-14	6.37447e-12	up	GWHBFHJ00000003	15865570	15867174	+	DJ26492	--	K22395 cinnamyl-alcohol dehydrogenase [EC:1.1.1.195] | (RefSeq) hypothetical protein (A)	ko00940: Phenylpropanoid biosynthesis; ko01100: Metabolic pathways; ko01110: Biosynthesis of secondary metabolites	berberine bridge enzyme-like 18 [Olea europaea var. sylvestris]	BBE18_ARATH RecName: Full=Berberine bridge enzyme-like 18 {ECO:0000303|PubMed:26037923}; Short=AtBBE-like 18 {ECO:0000303|PubMed:26037923}; EC=1.1.1.- {ECO:0000250|UniProtKB:O64743}; Flags: Precursor;	A0A6I9UB21_SESIN SubName: Full=berberine bridge enzyme-like 18 {ECO:0000313|RefSeq:XP_011096887.1};	--	GO:0005576,extracellular region; GO:0009505,plant-type cell wall; GO:0071949,FAD binding; GO:0016491,oxidoreductase activity; GO:0000166,nucleotide binding; GO:0003674,molecular_function; GO:0005488,binding; GO:0036094,small molecule binding; GO:0043167,ion binding; GO:0043168,anion binding; GO:0050660,flavin adenine dinucleotide binding; GO:0097159,organic cyclic compound binding; GO:1901265,nuc…	PF01565.26:FAD binding domain	--	--	--
DJ10749	23.1943	17.6819	18.0609	46.4472	41.5785	46.7114	367	382	270	782	718	723	1.24867	2.05e-14	1.23961e-11	up	GWHBFHJ00000008	29174165	29175948	+	DJ10749	--	K12835 ATP-dependent RNA helicase DDX42 [EC:3.6.4.13] | (RefSeq) DEAD-box ATP-dependent RNA helicase 24 isoform X1 (A)	ko03040: Spliceosome	probable WRKY transcription factor 28 [Olea europaea var. sylvestris]	WRK28_ARATH RecName: Full=WRKY transcription factor 28; AltName: Full=WRKY DNA-binding protein 28;	A0A5J4ZZB1_9ASTE RecName: Full=WRKY domain-containing protein {ECO:0000259|PROSITE:PS50811};	--	GO:0005634,nucleus; GO:0003700,DNA-binding transcription factor activity; GO:0043565,sequence-specific DNA binding; GO:1900057,positive regulation of leaf senescence; GO:0042659,regulation of cell fate specification; GO:0003674,molecular_function; GO:0140110,transcription regulator activity; GO:0003676,nucleic acid binding; GO:0003677,DNA binding; GO:0005488,binding; GO:0097159,organic cyclic com…	PF03106.18:WRKY DNA -binding domain	WRKY	TF	WRKY
DJ30623	23.22	18.6701	25.8742	50.4553	41.3957	49.4649	644	707	678	1489	1253	1342	1.12034	2.52771e-14	1.45673e-11	up	GWHBFHJ00000005	19387728	19391281	+	DJ30623	--	K00131 glyceraldehyde-3-phosphate dehydrogenase (NADP+) [EC:1.2.1.9] | (RefSeq) NADP-dependent glyceraldehyde-3-phosphate dehydrogenase (A)	ko00010: Glycolysis / Gluconeogenesis; ko00030: Pentose phosphate pathway; ko01100: Metabolic pathways; ko01200: Carbon metabolism	NADP-dependent glyceraldehyde-3-phosphate dehydrogenase [Olea europaea subsp. europaea]	GAPN_NICPL RecName: Full=NADP-dependent glyceraldehyde-3-phosphate dehydrogenase; EC=1.2.1.9; AltName: Full=Glyceraldehyde-3-phosphate dehydrogenase [NADP(+)]; AltName: Full=Non-phosphorylating glyceraldehyde 3-phosphate dehydrogenase; AltName: Full=Triosephosphate dehydrogenase;	A0A6I9TIN2_SESIN SubName: Full=NADP-dependent glyceraldehyde-3-phosphate dehydrogenase {ECO:0000313|RefSeq:XP_011084003.1};	Aldehyde dehydrogenase	GO:0005737,cytoplasm; GO:0008886,glyceraldehyde-3-phosphate dehydrogenase (NADP+) (non-phosphorylating) activity; GO:0003674,molecular_function; GO:0003824,catalytic activity; GO:0016491,oxidoreductase activity; GO:0016620,oxidoreductase activity, acting on the aldehyde or oxo group of donors, NAD or NADP as acceptor; GO:0016903,oxidoreductase activity, acting on the aldehyde or oxo group of dono…	PF00171.25:Aldehyde dehydrogenase family	--	--	--
novel.2149	3.8298	5.124	4.8515	12.8949	10.1959	12.701	127	232	152	455	369	412	1.41984	2.55963e-14	1.45673e-11	up	GWHBFHJ00000008	4039844	4043579	+	--	--	K25731 VPS35 endosomal protein-sorting factor-like | (RefSeq) UPF0505 protein C16orf62 homolog isoform X1 (A)	--	probable WRKY transcription factor 61 isoform X1 [Olea europaea var. sylvestris]	WK72A_SOLLC RecName: Full=WRKY transcription factor 72A {ECO:0000305}; Short=SlWRKY72a {ECO:0000303|PubMed:20409007}; AltName: Full=SlWRKY73 {ECO:0000303|PubMed:24884371}; AltName: Full=WRKY DNA-binding protein 72A {ECO:0000305};	A0A6I9SVW3_SESIN SubName: Full=probable WRKY transcription factor 72 {ECO:0000313|RefSeq:XP_011071617.1};	--	GO:0005634,nucleus; GO:0003700,DNA-binding transcription factor activity; GO:0043565,sequence-specific DNA binding; GO:0006952,defense response; GO:0003674,molecular_function; GO:0140110,transcription regulator activity; GO:0003676,nucleic acid binding; GO:0003677,DNA binding; GO:0005488,binding; GO:0097159,organic cyclic compound binding; GO:1901363,heterocyclic compound binding; GO:0006950,resp…	PF03106.18:WRKY DNA -binding domain	WRKY	TF	WRKY
DJ31332	5.958	6.7062	8.4302	1.9156	0.862	0.9296	190	292	254	65	30	29	-2.45836	3.9268e-14	2.17096e-11	down	GWHBFHJ00000005	27322888	27326547	-	DJ31332	--	K26562 MFS transporter, POT/PTR family, peptide/nitrate/nicotianamine transporter | (RefSeq) protein NRT1/ PTR FAMILY 5.6 (A)	--	protein NRT1/ PTR FAMILY 5.6 [Olea europaea var. sylvestris]	PTR45_ARATH RecName: Full=Protein NRT1/ PTR FAMILY 5.7; Short=AtNPF5.7;	A0A6I9U6K8_SESIN SubName: Full=protein NRT1/ PTR FAMILY 5.6 {ECO:0000313|RefSeq:XP_011094926.1};	H+/oligopeptide symporter	GO:0016021,integral component of membrane; GO:0071916,dipeptide transmembrane transporter activity; GO:0042937,tripeptide transmembrane transporter activity; GO:0003674,molecular_function; GO:0005215,transporter activity; GO:0022857,transmembrane transporter activity; GO:0035673,oligopeptide transmembrane transporter activity; GO:0042887,amide transmembrane transporter activity; GO:1904680,peptid…	PF00854.24:POT family	--	--	--
DJ29832	9.1535	10.3393	9.5177	3.8166	3.4848	4.0527	284	438	279	126	118	123	-1.30341	5.35655e-14	2.87914e-11	down	GWHBFHJ00000004	30369063	30371713	+	DJ29832	--	--	--	protein IQ-DOMAIN 14-like [Olea europaea var. sylvestris]	IQD13_ARATH RecName: Full=Protein IQ-DOMAIN 13 {ECO:0000303|PubMed:16368012}; Short=AtIQD13 {ECO:0000303|PubMed:16368012};	A0A068UQQ1_COFCA RecName: Full=DUF4005 domain-containing protein {ECO:0000259|Pfam:PF13178};	--	GO:0055028,cortical microtubule; GO:0005886,plasma membrane; GO:0005516,calmodulin binding; GO:0009834,plant-type secondary cell wall biogenesis; GO:2000652,regulation of secondary cell wall biogenesis; GO:0051592,response to calcium ion; GO:0010089,xylem development; GO:0003674,molecular_function; GO:0005488,binding; GO:0005515,protein binding; GO:0008150,biological_process; GO:0009832,plant-typ…	PF13178.9:Protein of unknown function (DUF4005)	--	--	--
novel.1485	6.0524	7.014	6.4871	24.6964	49.7711	30.2314	79	125	80	343	709	386	2.49714	8.47349e-14	4.43141e-11	up	GWHBFHJ00000006	10737727	10740283	+	--	--	K01803 triosephosphate isomerase (TIM) [EC:5.3.1.1] | (RefSeq) triosephosphate isomerase, cytosolic (A)	ko00010: Glycolysis / Gluconeogenesis; ko00051: Fructose and mannose metabolism; ko00562: Inositol phosphate metabolism; ko00710: Carbon fixation in photosynthetic organisms; ko01100: Metabolic pathways; ko01110: Biosynthesis of secondary metabolites; ko01200: Carbon metabolism; ko01230: Biosynthesis of amino acids	elicitor-responsive 1-like [Olea europaea subsp. europaea]	PP16A_ARATH RecName: Full=16 kDa phloem protein 1 {ECO:0000303|PubMed:29320165}; Short=AtPP16-1 {ECO:0000303|PubMed:29320165}; Short=Phloem protein 16-1 {ECO:0000303|PubMed:29320165}; AltName: Full=Elicitor-responsive protein FIERG2 {ECO:0000303|PubMed:15282545};	A0A068TVN6_COFCA RecName: Full=C2 domain-containing protein {ECO:0000259|PROSITE:PS50004};	Predicted Ca2+-dependent phospholipid-binding protein	GO:0046872,metal ion binding; GO:0003723,RNA binding; GO:0006952,defense response; GO:0003674,molecular_function; GO:0005488,binding; GO:0043167,ion binding; GO:0043169,cation binding; GO:0003676,nucleic acid binding; GO:0097159,organic cyclic compound binding; GO:1901363,heterocyclic compound binding; GO:0006950,response to stress; GO:0008150,biological_process; GO:0050896,response to stimulus	PF00168.33:C2 domain	--	--	--
DJ29564	4.9067	4.8244	8.8216	0.379	0.4311	0.8245	73	98	124	6	7	12	-3.44729	1.14965e-13	5.85415e-11	down	GWHBFHJ00000004	27901718	27903070	+	DJ29564	--	K02872 large subunit ribosomal protein L13Ae | (RefSeq) 60S ribosomal protein L13a-4-like (A)	ko03010: Ribosome	Hypothetical predicted protein [Olea europaea subsp. europaea]	FLA11_ARATH RecName: Full=Fasciclin-like arabinogalactan protein 11; Flags: Precursor;	A0A6I9U653_SESIN SubName: Full=fasciclin-like arabinogalactan protein 11 {ECO:0000313|RefSeq:XP_011089317.1};	--	GO:0031225,anchored component of membrane; GO:0005886,plasma membrane; GO:0009834,plant-type secondary cell wall biogenesis; GO:0008150,biological_process; GO:0009832,plant-type cell wall biogenesis; GO:0009987,cellular process; GO:0042546,cell wall biogenesis; GO:0044085,cellular component biogenesis; GO:0071554,cell wall organization or biogenesis; GO:0071669,plant-type cell wall organization o…	PF02469.25:Fasciclin domain	--	--	--
novel.1218	0.9803	0.7898	0.7263	5.4356	11.4974	14.1302	10	11	7	59	128	141	3.70288	1.49237e-13	7.40443e-11	up	GWHBFHJ00000005	18540009	18540634	.	--	--	--	--	uncharacterized protein LOC111400531 [Olea europaea var. sylvestris]	--	A0A830CY90_9LAMI SubName: Full=Uncharacterized protein {ECO:0000313|EMBL:GFQ02539.1};	--	--	--	--	--	--
DJ25283	426.117	357.55	272.124	1039.37	1355.66	1114.77	6666	7637	4022	17301	23145	17059	1.79451	1.67992e-13	8.12663e-11	up	GWHBFHJ00000002	25507117	25508502	+	DJ25283	--	K00430 peroxidase [EC:1.11.1.7] | (RefSeq) peroxidase N1-like (A)	ko00940: Phenylpropanoid biosynthesis; ko01100: Metabolic pathways; ko01110: Biosynthesis of secondary metabolites	peroxidase [Dorcoceras hygrometricum]	PERN1_TOBAC RecName: Full=Peroxidase N1; EC=1.11.1.7; AltName: Full=Peroxidase B2; AltName: Full=Peroxidase B3; Flags: Precursor;	A0A2Z7BEK3_9LAMI RecName: Full=Peroxidase {ECO:0000256|ARBA:ARBA00012313, ECO:0000256|RuleBase:RU362060}; EC=1.11.1.7 {ECO:0000256|ARBA:ARBA00012313, ECO:0000256|RuleBase:RU362060};	--	GO:0005576,extracellular region; GO:0009505,plant-type cell wall; GO:0020037,heme binding; GO:0046872,metal ion binding; GO:0004601,peroxidase activity; GO:0042744,hydrogen peroxide catabolic process; GO:0006979,response to oxidative stress; GO:0003674,molecular_function; GO:0005488,binding; GO:0046906,tetrapyrrole binding; GO:0097159,organic cyclic compound binding; GO:1901363,heterocyclic compo…	PF00141.26:Peroxidase	--	--	--
DJ12177	21.1728	33.1651	25.5184	98.3681	133.737	85.4609	620	1326	706	3065	4274	2448	2.05587	1.98125e-13	9.35054e-11	up	GWHBFHJ00000009	4362178	4364214	-	DJ12177	--	K14487 auxin responsive GH3 gene family | (RefSeq) probable indole-3-acetic acid-amido synthetase GH3.1 (A)	ko04075: Plant hormone signal transduction	probable indole-3-acetic acid-amido synthetase GH3.1 [Olea europaea var. sylvestris]	GH31_ARATH RecName: Full=Probable indole-3-acetic acid-amido synthetase GH3.1; EC=6.3.2.-; AltName: Full=Auxin-responsive GH3-like protein 1; Short=AtGH3-1;	A0A6I9TTE8_SESIN SubName: Full=probable indole-3-acetic acid-amido synthetase GH3.1 {ECO:0000313|RefSeq:XP_011088186.1};	--	GO:0005737,cytoplasm; GO:0016881,acid-amino acid ligase activity; GO:0009733,response to auxin; GO:0003674,molecular_function; GO:0003824,catalytic activity; GO:0016874,ligase activity; GO:0016879,ligase activity, forming carbon-nitrogen bonds; GO:0008150,biological_process; GO:0009719,response to endogenous stimulus; GO:0009725,response to hormone; GO:0010033,response to organic substance; GO:00…	PF03321.16:GH3 auxin-responsive promoter	--	--	--
DJ28089	4.5668	8.0484	20.3921	0.2682	0	0.3647	64	154	270	4	0	5	-5.66849	2.12424e-13	9.61536e-11	down	GWHBFHJ00000004	2292173	2293032	-	DJ28089	--	K02872 large subunit ribosomal protein L13Ae | (RefSeq) 60S ribosomal protein L13a-4-like (A)	ko03010: Ribosome	fasciclin-like arabinogalactan protein 11 [Olea europaea var. sylvestris]	FLA11_ARATH RecName: Full=Fasciclin-like arabinogalactan protein 11; Flags: Precursor;	A0A1U7ZP66_NELNU SubName: Full=fasciclin-like arabinogalactan protein 11 {ECO:0000313|RefSeq:XP_010253626.1};	--	GO:0031225,anchored component of membrane; GO:0005886,plasma membrane; GO:0009834,plant-type secondary cell wall biogenesis; GO:0008150,biological_process; GO:0009832,plant-type cell wall biogenesis; GO:0009987,cellular process; GO:0042546,cell wall biogenesis; GO:0044085,cellular component biogenesis; GO:0071554,cell wall organization or biogenesis; GO:0071669,plant-type cell wall organization o…	PF02469.25:Fasciclin domain	--	--	--
novel.3907	3.1625	0.7027	1.8053	18.8681	26.4053	15.1477	89	27	48	565	811	417	3.50485	2.13675e-13	9.61536e-11	up	GWHBFHJ00000013	32769515	32773687	-	--	--	K25731 VPS35 endosomal protein-sorting factor-like | (RefSeq) UPF0505 protein C16orf62 homolog isoform X1 (A)	--	probable WRKY transcription factor 72 [Olea europaea subsp. europaea]	WK72A_SOLLC RecName: Full=WRKY transcription factor 72A {ECO:0000305}; Short=SlWRKY72a {ECO:0000303|PubMed:20409007}; AltName: Full=SlWRKY73 {ECO:0000303|PubMed:24884371}; AltName: Full=WRKY DNA-binding protein 72A {ECO:0000305};	A0A6G7SE98_9ROSI SubName: Full=WRKY transcription factor 2 {ECO:0000313|EMBL:QIK00162.1};	--	GO:0005634,nucleus; GO:0003700,DNA-binding transcription factor activity; GO:0043565,sequence-specific DNA binding; GO:0006952,defense response; GO:0003674,molecular_function; GO:0140110,transcription regulator activity; GO:0003676,nucleic acid binding; GO:0003677,DNA binding; GO:0005488,binding; GO:0097159,organic cyclic compound binding; GO:1901363,heterocyclic compound binding; GO:0006950,resp…	PF03106.18:WRKY DNA -binding domain	WRKY	TF	WRKY
DJ06801	26.5982	18.9713	22.3562	2.5324	5.4159	2.9323	306	298	243	31	68	33	-2.55836	2.63951e-13	1.16079e-10	down	GWHBFHJ00000007	6841189	6841894	+	DJ06801	--	K03676 glutaredoxin 3 | (RefSeq) monothiol glutaredoxin-S2-like isoform X1 (A)	--	monothiol glutaredoxin-S2-like [Olea europaea var. sylvestris]	GRXS2_ARATH RecName: Full=Monothiol glutaredoxin-S2; Short=AtGrxS2; AltName: Full=Protein ROXY 10;	A0A7N0ZRA9_KALFE RecName: Full=Glutaredoxin domain-containing protein {ECO:0000259|Pfam:PF00462};	Glutaredoxin and related proteins	GO:0005737,cytoplasm; GO:0051537,2 iron, 2 sulfur cluster binding; GO:0097573,glutathione oxidoreductase activity; GO:0046872,metal ion binding; GO:0000122,negative regulation of transcription by RNA polymerase II; GO:0003674,molecular_function; GO:0005488,binding; GO:0051536,iron-sulfur cluster binding; GO:0051540,metal cluster binding; GO:0003824,catalytic activity; GO:0015035,protein-disulfide…	PF00462.27:Glutaredoxin	--	--	--
DJ16875	52.9988	25.1967	18.3704	239.284	510.324	233.352	342	222	112	1643	3594	1473	3.42897	3.13358e-13	1.34744e-10	up	GWHBFHJ00000011	976038	978351	+	DJ16875	--	K20769 fatty acid omega-hydroxylase [EC:1.14.-.-] | (RefSeq) cytochrome P450 94A2 (A)	ko00073: Cutin, suberine and wax biosynthesis	hypothetical protein BUALT_Bualt05G0076000 [Buddleja alternifolia]	BGIA_MOMCH RecName: Full=Glu S.griseus protease inhibitor; AltName: Full=BGIA;	A0A834YU35_9MAGN SubName: Full=Uncharacterized protein {ECO:0000313|EMBL:KAF8394317.1};	--	GO:0004867,serine-type endopeptidase inhibitor activity; GO:0009611,response to wounding; GO:0003674,molecular_function; GO:0004857,enzyme inhibitor activity; GO:0004866,endopeptidase inhibitor activity; GO:0030234,enzyme regulator activity; GO:0030414,peptidase inhibitor activity; GO:0061134,peptidase regulator activity; GO:0061135,endopeptidase regulator activity; GO:0098772,molecular function …	PF00280.21:Potato inhibitor I family	--	--	--
novel.1256	191.078	305.269	192.508	2122.8	913.037	997.587	2410	5257	2294	28489	12568	12308	2.57718	3.39357e-13	1.42751e-10	up	GWHBFHJ00000005	20744583	20745691	-	--	--	K20628 expansin | (RefSeq) expansin-A10-like (A)	--	hypothetical protein BUALT_Bualt12G0068400 [Buddleja alternifolia]	EGC_CITJA RecName: Full=EG45-like domain containing protein; AltName: Full=Blight-associated protein p12; AltName: Full=Plant natriuretic peptide; Short=PNP; Flags: Precursor;	A0A022RPU1_ERYGU RecName: Full=Expansin-like EG45 domain-containing protein {ECO:0000259|PROSITE:PS50842};	--	GO:0048046,apoplast; GO:0009627,systemic acquired resistance; GO:0006950,response to stress; GO:0006952,defense response; GO:0008150,biological_process; GO:0009605,response to external stimulus; GO:0009607,response to biotic stimulus; GO:0043207,response to external biotic stimulus; GO:0044419,biological process involved in interspecies interaction between organisms; GO:0050896,response to stimul…	PF03330.21:Lytic transglycolase	--	--	--
DJ15701	5.7338	3.2536	4.866	16.263	13.3	13.7297	111	86	89	335	281	260	1.71214	6.76615e-13	2.7276e-10	up	GWHBFHJ00000010	22834084	22835359	-	DJ15701	--	K22683 aspartyl protease family protein [EC:3.4.23.-] | (RefSeq) aspartyl protease family protein 2 (A)	--	basic 7S globulin-like [Olea europaea subsp. europaea]	GIP2_NICBE RecName: Full=Probable aspartic proteinase GIP2 {ECO:0000305}; EC=3.4.23.- {ECO:0000305}; AltName: Full=Glucanase inhibitor protein 2 {ECO:0000303|PubMed:28082413}; Short=NbGIP2 {ECO:0000303|PubMed:28082413}; Flags: Precursor;	A0A6I9UX34_SESIN SubName: Full=basic 7S globulin-like {ECO:0000313|RefSeq:XP_011099700.2};	Aspartyl protease	GO:0048046,apoplast; GO:0004190,aspartic-type endopeptidase activity; GO:0006952,defense response; GO:0006508,proteolysis; GO:0003674,molecular_function; GO:0003824,catalytic activity; GO:0004175,endopeptidase activity; GO:0008233,peptidase activity; GO:0016787,hydrolase activity; GO:0070001,aspartic-type peptidase activity; GO:0140096,catalytic activity, acting on a protein; GO:0006950,response …	PF14541.9:Xylanase inhibitor C-terminal	--	--	--
novel.1330	6.575	3.403	2.0414	30.8138	68.1982	32.3529	75	53	22	374	849	361	3.52997	7.33819e-13	2.83988e-10	up	GWHBFHJ00000005	27266268	27266967	.	--	--	--	--	Hypothetical predicted protein [Olea europaea subsp. europaea]	--	A0A7J0E831_9ERIC SubName: Full=Uncharacterized protein {ECO:0000313|EMBL:GFY82634.1};	--	--	--	--	--	--
DJ25256	17.1369	16.2634	9.3246	67.3134	96.3695	55.517	284	368	146	1187	1743	900	2.42121	7.53759e-13	2.85985e-10	up	GWHBFHJ00000002	25040300	25041960	+	DJ25256	--	K17338 receptor expression-enhancing protein 1/2/3/4 | (RefSeq) putative HVA22-like protein g isoform X1 (A)	--	hypothetical protein BUALT_Bualt15G0082000 [Buddleja alternifolia]	COS1_COCNU RecName: Full=Cocosin 1 {ECO:0000305}; AltName: Full=11S globulin 1 {ECO:0000303|Ref.1, ECO:0000312|EMBL:AKS26848.1}; AltName: Full=CnCOS-1 {ECO:0000303|Ref.1}; Contains: RecName: Full=Cocosin 1 acidic chain {ECO:0000305}; Contains: RecName: Full=Cocosin 1 basic chain {ECO:0000305}; Flags: Precursor;	A0A830CP08_9LAMI SubName: Full=11s globulin seed storage protein 2 {ECO:0000313|EMBL:GFP99198.1};	--	GO:0043245,extraorganismal space; GO:0045735,nutrient reservoir activity; GO:0048316,seed development; GO:0010431,seed maturation; GO:0003674,molecular_function; GO:0000003,reproduction; GO:0003006,developmental process involved in reproduction; GO:0007275,multicellular organism development; GO:0008150,biological_process; GO:0009791,post-embryonic development; GO:0010154,fruit development; GO:002…	PF00190.25:Cupin	--	--	--
novel.3279	14.9811	16.6615	12.6851	37.9619	35.9949	35.7346	135	205	108	364	354	315	1.3534	1.3885e-12	5.16682e-10	up	GWHBFHJ00000011	25944071	25944623	.	--	--	K09338 homeobox-leucine zipper protein | (RefSeq) homeobox-leucine zipper protein HOX27-like (A)	--	hypothetical protein CDL12_13746 [Handroanthus impetiginosus]	--	A0A2G9H8J7_9LAMI SubName: Full=Uncharacterized protein {ECO:0000313|EMBL:PIN13630.1};	--	GO:0045087,innate immune response; GO:0050793,regulation of developmental process; GO:0002376,immune system process; GO:0006950,response to stress; GO:0006952,defense response; GO:0006955,immune response; GO:0008150,biological_process; GO:0009605,response to external stimulus; GO:0009607,response to biotic stimulus; GO:0043207,response to external biotic stimulus; GO:0044419,biological process in…	--	--	--	--
DJ30569	4.6051	4.8887	5.3123	16.1932	23.9899	14.8108	89	129	97	333	506	280	1.96704	1.44534e-12	5.27686e-10	up	GWHBFHJ00000005	18513206	18515093	+	DJ30569	--	K00521 ferric-chelate reductase [EC:1.16.1.7] | (RefSeq) ferric reduction oxidase 7, chloroplastic-like (A)	--	NAC domain-containing protein 92-like isoform X1 [Olea europaea var. sylvestris]	NAC87_ARATH RecName: Full=NAC domain-containing protein 87 {ECO:0000303|PubMed:15029955}; Short=ANAC087 {ECO:0000303|PubMed:15029955};	A0A6I9T481_SESIN SubName: Full=NAC domain-containing protein 92 {ECO:0000313|RefSeq:XP_011078584.1};	--	GO:0005737,cytoplasm; GO:0005634,nucleus; GO:0003700,DNA-binding transcription factor activity; GO:0000976,transcription cis-regulatory region binding; GO:0003674,molecular_function; GO:0140110,transcription regulator activity; GO:0001067,transcription regulatory region nucleic acid binding; GO:0003676,nucleic acid binding; GO:0003677,DNA binding; GO:0003690,double-stranded DNA binding; GO:000548…	PF02365.18:No apical meristem (NAM) protein	NAC	TF	NAC
DJ09970	7.4492	5.7445	6.5912	14.3349	17.0097	16.9628	189	199	158	387	471	421	1.35383	2.17005e-12	7.63463e-10	up	GWHBFHJ00000008	11956097	11957842	+	DJ09970	--	K20617 cytochrome P450 family 71 subfamily A | (RefSeq) cytochrome P450 71A1-like (A)	--	cytochrome P450 71A6-like [Olea europaea var. sylvestris]	C71A6_NEPRA RecName: Full=Cytochrome P450 71A6; EC=1.14.-.-; Flags: Fragment;	A0A6I9SRY0_SESIN SubName: Full=cytochrome P450 71A6-like {ECO:0000313|RefSeq:XP_011071980.1};	Cytochrome P450 CYP2 subfamily	GO:0016021,integral component of membrane; GO:0020037,heme binding; GO:0005506,iron ion binding; GO:0004497,monooxygenase activity; GO:0016705,oxidoreductase activity, acting on paired donors, with incorporation or reduction of molecular oxygen; GO:0003674,molecular_function; GO:0005488,binding; GO:0046906,tetrapyrrole binding; GO:0097159,organic cyclic compound binding; GO:1901363,heterocyclic c…	PF00067.25:Cytochrome P450	--	--	--
