# Supplementary material for: Genome-wide identification and expression analysis of the LBD gene family in Jasminum sambac
Source: Research Square preprint supplement (doi:10.21203/rs.3.rs-7770306/v1), 2025-10-30
Supplement: Supplementary file 10 [file ff5af961061017ac5557d201.xlsx]

## Sheet: Sheet1
Index	Compounds	Class	DJ2-1 (48 h, ng/g, FW)	DJ2-2 (48 h, ng/g, FW)	DJ2-3 (48 h, ng/g, FW)	DJ3-1 (96 h, ng/g, FW)	DJ3-2 (96 h, ng/g, FW)	DJ3-3 (96 h, ng/g, FW)	Index	Compounds	Class	Pvalue	FDR	Fold_Change (96h / 48h)	Log2FC	Type
tZRMP	9-Ribosyl-trans-zeatin 5'-monophosphate	CK	30.0283	60.3432	17.7063	9.71699	10.189	10.9231	tZRMP	9-Ribosyl-trans-zeatin 5'-monophosphate	CK	0.179046	0.355595	0.285249	-1.80971	down
tZ	trans-Zeatin	CK	3.41062	2.81618	1.80956	1.6656	0.985317	1.29216	tZ	trans-Zeatin	CK	0.083715	0.281308	0.490655	-1.02722	down
IPA	3-Indolepropionic acid	Auxin	59.6527	71.1732	54.5955	214.522	145.87	105.811	IPA	3-Indolepropionic acid	Auxin	0.0950318	0.281308	2.51429	1.33015	up
OPDA	cis(+)-12-Oxophytodienoic acid	JA	13.1919	10.6193	11.9896	0	0	9.30907	OPDA	cis(+)-12-Oxophytodienoic acid	JA	0.0972383	0.281308	0.260024	-1.94328	down
2MeSiPR	2-Methylthio-N6-isopentenyladenosine	CK	2.00106	1.08639	1.74019	7.22082	6.3958	8.33529	2MeSiPR	2-Methylthio-N6-isopentenyladenosine	CK	0.00321321	0.0596354	4.54714	2.18496	up
cZR	cis-Zeatin riboside	CK	0	0	0	1.06224	1.08496	2.55458	cZR	cis-Zeatin riboside	CK	0.0865442	0.281308	inf	inf	up
12-OH-JA	12-Hydroxyjasmonic acid	JA	35.8165	37.7408	33.5758	0	0	0	12-OH-JA	12-Hydroxyjasmonic acid	JA	0.00113379	0.0544222	0	-inf	down
DHZR	Dihydrozeatin ribonucleoside	CK	0	0.978752	0	1.40369	0.818549	1.67051	DHZR	Dihydrozeatin ribonucleoside	CK	0.0820694	0.281308	3.97726	1.99177	up
2-Coumarate	2-Coumarate	SA	0	0	11.0444	0	16.5436	12.2942	2-Coumarate	2-Coumarate	SA	0.39557	0.593355	2.61108	1.38464	up
ST	（±）Strigol	SL	0	0	0	64.8933	84.6613	103.596	ST	（±）Strigol	SL	0.0170851	0.164017	inf	inf	up
IAA-Val	N-(3-Indolylacetyl)-L-valine	Auxin	0	0	0	0	1.34347	1.47137	IAA-Val	N-(3-Indolylacetyl)-L-valine	Auxin	0.184345	0.355595	inf	inf	up
OPC-6	3-oxo-2-(2-(Z)-Pentenyl)cyclopentane-1-hexanoic acid	JA	0	0	0	0	8.43522	10.5303	OPC-6	3-oxo-2-(2-(Z)-Pentenyl)cyclopentane-1-hexanoic acid	JA	0.18844	0.355595	inf	inf	up
OPC-4	3-oxo-2-(2-(Z)-Pentenyl) cyclopentane-1-butyric acid	JA	0	0	0	9.43757	0	12.0348	OPC-4	3-oxo-2-(2-(Z)-Pentenyl) cyclopentane-1-butyric acid	JA	0.189412	0.355595	inf	inf	up
MEJA	Methyl jasmonate	JA	0	37.6851	32.6644	0	0	0	MEJA	Methyl jasmonate	JA	0.185575	0.355595	0	-inf	down
